# Supplementary material for: Prognostic and immune infiltrative biomarkers of CENPO in pan–cancer and its relationship with lung adenocarcinoma cell proliferation and metastasis
Source: Springer Nature journal article supplement (doi:10.1186/s12885-023-11233-2), 2023-08-09

Repeat 1

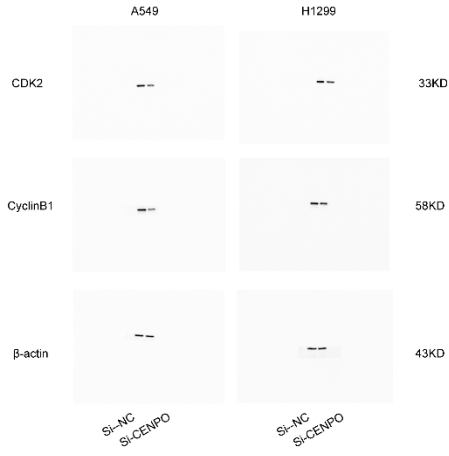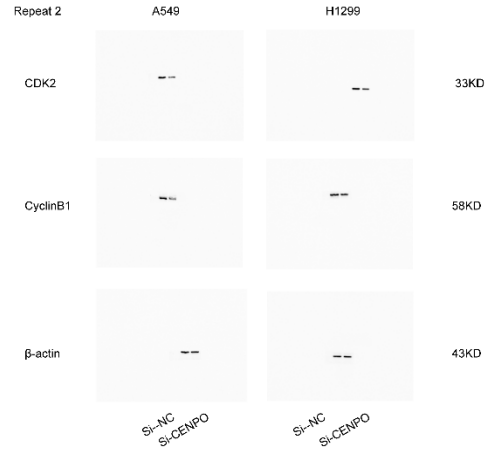

Repeat 3

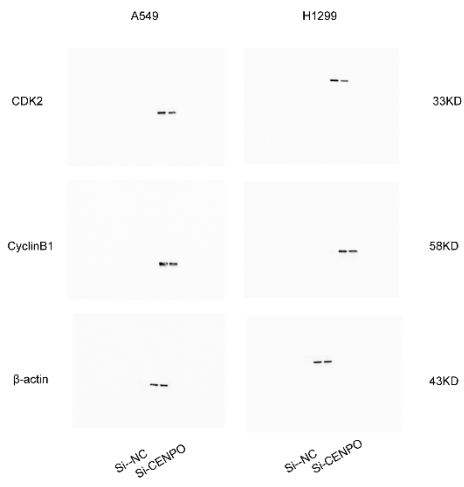

Supplement: MOESM15 [file 25904274]
