# Supplementary material for: Prognostic and immune infiltrative biomarkers of CENPO in pan–cancer and its relationship with lung adenocarcinoma cell proliferation and metastasis
Source: Springer Nature journal article supplement (doi:10.1186/s12885-023-11233-2), 2023-08-09

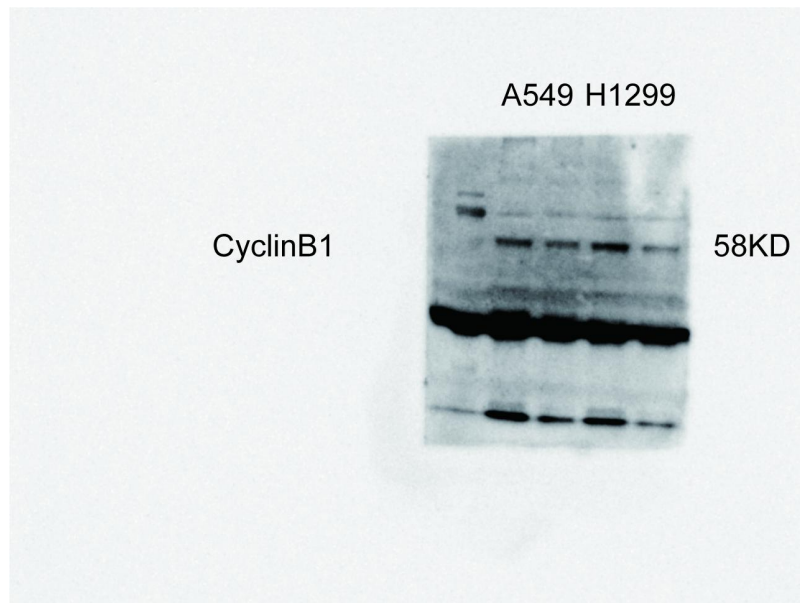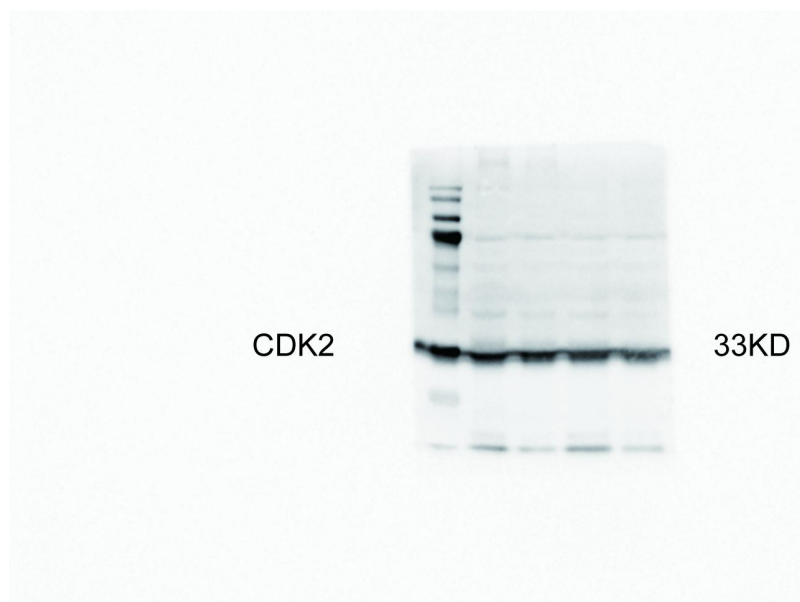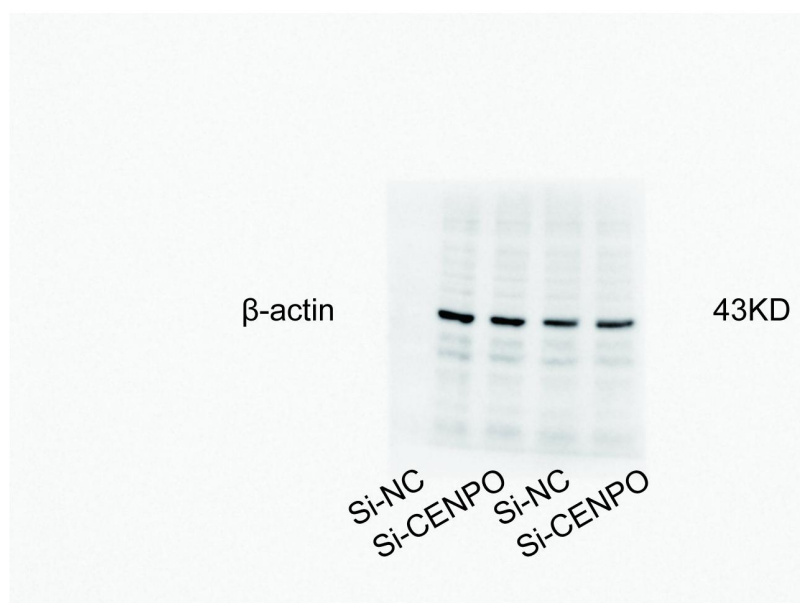

Supplement: MOESM16 [file 25904274]
