# Supplementary material for: Prognostic and immune infiltrative biomarkers of CENPO in pan–cancer and its relationship with lung adenocarcinoma cell proliferation and metastasis
Source: BMC Cancer. 2023 Aug 9;23:735. doi: 10.1186/s12885-023-11233-2 (PMC10410993; doi:10.1186/s12885-023-11233-2)
Supplement: Supplementary file 1 — Additional file 1. [file 12885_2023_11233_MOESM1_ESM.xlsx]

## Sheet: 4220DEGs
row.names(tT)	logFC	AveExpr	t	P.Value	adj.P.Val	B	regulated
2023-03-10	-1.69085	4.15943	-4.23364	4.65e-05	0.000114927	0.905175	Down-Regulated
?|729884	4.80023	3.66542	10.0973	1.52e-17	1.8e-16	29.1814	Up-Regulated
?|90288	-2.1177	4.66528	-6.11061	1.39e-08	5.4e-08	8.78079	Down-Regulated
A2M	-1.88051	15.3075	-11.9212	8.06e-22	1.69e-20	38.9652	Down-Regulated
A2ML1	1.01086	1.25169	3.67205	0.000366598	0.000792988	-1.05792	Up-Regulated
AACSL	-1.09933	1.35937	-5.59207	1.54e-07	5.22e-07	6.43313	Down-Regulated
AADAC	-3.39359	6.03157	-8.78015	1.79e-14	1.42e-13	22.1628	Down-Regulated
AATK	-2.96394	8.11556	-14.3108	2.68e-27	1.27e-25	51.5155	Down-Regulated
ABCA10	-2.28341	4.17502	-10.6453	7.84e-19	1.1e-17	32.1246	Down-Regulated
ABCA12	5.30138	4.09123	14.7539	2.74e-28	1.59e-26	53.7842	Up-Regulated
ABCA3	-2.96702	12.8253	-12.3408	8.53e-23	2.05e-21	41.2005	Down-Regulated
ABCA4	1.68615	5.14071	4.38234	2.61e-05	6.68e-05	1.45944	Up-Regulated
ABCA6	-1.72506	7.25428	-8.6425	3.72e-14	2.85e-13	21.4381	Down-Regulated
ABCA8	-3.95965	8.23441	-14.2007	4.74e-27	2.18e-25	50.9484	Down-Regulated
ABCA9	-2.32177	6.21743	-11.0082	1.1e-19	1.73e-18	34.0738	Down-Regulated
ABCB1	-1.74118	6.4146	-7.42009	2.19e-11	1.19e-10	15.133	Down-Regulated
ABCB4	1.63291	3.62485	7.43635	2.01e-11	1.1e-10	15.215	Up-Regulated
ABCB6	1.4403	8.46261	9.6292	1.9e-16	1.96e-15	26.6742	Up-Regulated
ABCC11	1.00848	1.15541	4.77422	5.36e-06	1.5e-05	2.98396	Up-Regulated
ABCC13	-2.583	3.03462	-11.6309	3.84e-21	7.29e-20	37.413	Down-Regulated
ABCC2	1.51658	3.56536	3.84477	0.000198371	0.000445722	-0.476894	Up-Regulated
ABCC3	1.94237	10.594	10.3209	4.53e-18	5.78e-17	30.3818	Up-Regulated
ABCC6	-1.58841	8.53716	-9.10863	3.1e-15	2.71e-14	23.9007	Down-Regulated
ABCC8	-1.37029	2.59176	-4.56393	1.27e-05	3.38e-05	2.15464	Down-Regulated
ABCC9	-1.0354	8.72989	-7.63469	7.27e-12	4.23e-11	16.2192	Down-Regulated
ABCG1	-1.41928	10.3019	-10.6691	6.9e-19	9.72e-18	32.2524	Down-Regulated
ABCG2	-2.13662	7.37992	-10.855	2.52e-19	3.75e-18	33.2514	Down-Regulated
ABHD11	1.09349	8.98637	8.50463	7.73e-14	5.67e-13	20.7146	Up-Regulated
ABHD12B	-1.1261	2.28543	-4.30758	3.49e-05	8.77e-05	1.17905	Down-Regulated
ABHD6	-1.22074	7.92473	-11.0039	1.13e-19	1.77e-18	34.0509	Down-Regulated
ABI3BP	-2.88024	9.97784	-13.7321	5.44e-26	2.14e-24	48.5217	Down-Regulated
ABLIM1	-1.23569	11.8257	-8.33392	1.9e-13	1.34e-12	19.8225	Down-Regulated
ABLIM3	-1.59072	9.10043	-9.64184	1.77e-16	1.84e-15	26.7417	Down-Regulated
ABP1	3.02611	5.87196	7.38458	2.62e-11	1.41e-10	14.9543	Up-Regulated
ABTB1	-1.07131	9.3473	-13.808	3.66e-26	1.47e-24	48.9162	Down-Regulated
ACACB	-1.80724	8.35177	-12.3144	9.81e-23	2.34e-21	41.0604	Down-Regulated
ACADL	-4.54977	6.6884	-17.7206	1.16e-34	2.32e-32	68.3768	Down-Regulated
ACAN	1.52052	4.6919	4.56932	1.24e-05	3.31e-05	2.17558	Up-Regulated
ACCN2	1.04106	5.28594	5.27261	6.39e-07	2e-06	5.04598	Up-Regulated
ACE	-1.82127	10.843	-14.0848	8.65e-27	3.78e-25	50.3504	Down-Regulated
ACMSD	1.58114	1.17019	4.65731	8.67e-06	2.36e-05	2.51976	Up-Regulated
ACOT11	1.56179	6.86548	11.2057	3.8e-20	6.31e-19	35.1341	Up-Regulated
ACOXL	-3.26365	6.244	-12.4419	4.97e-23	1.24e-21	41.7374	Down-Regulated
ACP5	-1.92622	11.8467	-11.1322	5.65e-20	9.21e-19	34.7398	Down-Regulated
ACR	-1.3328	2.27165	-7.58891	9.21e-12	5.29e-11	15.9867	Down-Regulated
ACRV1	1.02224	0.681881	6.46651	2.53e-09	1.07e-08	10.4531	Up-Regulated
ACSBG1	-2.16704	3.76441	-7.77324	3.56e-12	2.15e-11	16.9259	Down-Regulated
ACSM1	-1.14633	3.7576	-5.51037	2.22e-07	7.4e-07	6.07383	Down-Regulated
ACSM5	-1.89069	3.83089	-9.14626	2.54e-15	2.24e-14	24.1005	Down-Regulated
ACSS1	-1.0945	9.7679	-7.38161	2.66e-11	1.43e-10	14.9394	Down-Regulated
ACSS3	-2.18181	7.67813	-12.5813	2.36e-23	6.21e-22	42.4769	Down-Regulated
ACTBL2	1.1245	2.00173	4.5645	1.26e-05	3.37e-05	2.15687	Up-Regulated
ACTG2	-1.15614	8.86701	-4.77174	5.41e-06	1.51e-05	2.97403	Down-Regulated
ACTL8	1.0834	0.582965	5.13638	1.16e-06	3.51e-06	4.46949	Up-Regulated
ACTN2	-3.71023	4.39467	-20.8099	8.63e-41	7.7e-38	82.3845	Down-Regulated
ACVRL1	-2.4031	10.592	-18.4983	2.97e-36	8.59e-34	72.0191	Down-Regulated
ACY3	2.16058	3.86257	9.03771	4.53e-15	3.89e-14	23.5245	Up-Regulated
ADAM12	2.9908	7.26529	10.1827	9.56e-18	1.16e-16	29.6396	Up-Regulated
ADAM19	1.00913	8.83541	5.6925	9.73e-08	3.39e-07	6.87891	Up-Regulated
ADAM28	2.17164	7.46477	9.17923	2.13e-15	1.91e-14	24.2756	Up-Regulated
ADAM29	-1.71818	1.9509	-8.77531	1.84e-14	1.46e-13	22.1372	Down-Regulated
ADAM32	1.03363	1.76736	4.65055	8.91e-06	2.42e-05	2.49317	Up-Regulated
ADAM33	-1.72782	5.56745	-7.41822	2.21e-11	1.2e-10	15.1236	Down-Regulated
ADAM6	1.93571	15.2262	5.72129	8.53e-08	2.99e-07	7.00755	Up-Regulated
ADAM8	2.11159	9.17701	11.1995	3.93e-20	6.52e-19	35.1013	Up-Regulated
ADAMDEC1	2.42244	5.58913	5.79717	6.02e-08	2.15e-07	7.34822	Up-Regulated
ADAMTS1	-2.09365	10.6516	-10.8007	3.38e-19	4.93e-18	32.9597	Down-Regulated
ADAMTS12	1.87939	6.60758	7.42179	2.17e-11	1.18e-10	15.1416	Up-Regulated
ADAMTS14	2.57688	5.43943	11.7747	1.77e-21	3.54e-20	38.1825	Up-Regulated
ADAMTS15	-1.68731	5.29464	-7.75441	3.92e-12	2.35e-11	16.8296	Down-Regulated
ADAMTS16	3.14813	4.78268	9.05726	4.08e-15	3.52e-14	23.6282	Up-Regulated
ADAMTS18	1.82696	2.5506	6.25598	6.98e-09	2.81e-08	9.45826	Up-Regulated
ADAMTS8	-4.45354	7.79877	-15.2167	2.6e-29	1.77e-27	56.1303	Down-Regulated
ADAMTSL3	-2.57017	7.99125	-13.9773	1.51e-26	6.31e-25	49.7944	Down-Regulated
ADAMTSL4	-2.25187	10.0218	-13.3137	4.88e-25	1.65e-23	46.3368	Down-Regulated
ADARB1	-1.72536	9.60966	-11.9885	5.62e-22	1.2e-20	39.3246	Down-Regulated
ADARB2	-1.21741	2.67566	-5.61602	1.38e-07	4.71e-07	6.53902	Down-Regulated
ADCK5	1.18781	6.71115	9.64337	1.76e-16	1.82e-15	26.7499	Up-Regulated
ADCY4	-2.05092	7.6803	-14.2712	3.29e-27	1.55e-25	51.3117	Down-Regulated
ADCY5	-1.37112	5.26253	-5.75198	7.41e-08	2.62e-07	7.14501	Down-Regulated
ADCY8	-4.46395	3.37322	-14.4782	1.13e-27	5.73e-26	52.3751	Down-Regulated
ADCY9	-1.38286	10.2529	-11.5108	7.33e-21	1.34e-19	36.7699	Down-Regulated
ADCYAP1R1	-1.28702	1.51463	-6.78648	5.29e-10	2.42e-09	11.9937	Down-Regulated
ADH1A	-3.48012	4.51866	-13.5513	1.4e-25	5.19e-24	47.5795	Down-Regulated
ADH1B	-4.49507	11.0448	-12.2827	1.16e-22	2.73e-21	40.8917	Down-Regulated
ADH1C	-1.30944	5.84848	-3.03885	0.00294032	0.00560385	-3.00166	Down-Regulated
ADH7	-1.21674	2.32227	-3.0761	0.00262137	0.00503478	-2.89578	Down-Regulated
ADHFE1	-1.93291	6.03511	-10.3407	4.07e-18	5.23e-17	30.4881	Down-Regulated
ADM2	3.27332	6.39109	16.4469	5.55e-32	6.48e-30	62.2444	Up-Regulated
ADPRH	-1.49224	9.16326	-16.7596	1.2e-32	1.58e-30	63.7691	Down-Regulated
ADRA1A	-3.56785	3.0513	-17.6618	1.54e-34	3.01e-32	68.0982	Down-Regulated
ADRA1B	-1.0626	5.07186	-4.57165	1.23e-05	3.28e-05	2.18462	Down-Regulated
ADRA1D	-2.21936	4.00688	-11.0225	1.02e-19	1.61e-18	34.1509	Down-Regulated
ADRA2C	-1.53156	5.07726	-6.18904	9.6e-09	3.8e-08	9.14532	Down-Regulated
ADRB1	-4.12796	6.96614	-14.4133	1.58e-27	7.84e-26	52.0419	Down-Regulated
ADRB2	-3.42783	8.04849	-19.9241	4.37e-39	2.19e-36	78.4932	Down-Regulated
ADSSL1	1.11446	7.09853	6.46458	2.56e-09	1.08e-08	10.4439	Up-Regulated
AFAP1L1	-1.57928	8.78213	-11.5076	7.46e-21	1.36e-19	36.7532	Down-Regulated
AFF2	-2.08692	6.03567	-9.17649	2.16e-15	1.93e-14	24.261	Down-Regulated
AFF3	-3.27357	7.76576	-13.4102	2.94e-25	1.03e-23	46.8423	Down-Regulated
AG2	-1.88588	9.82484	-10.0663	1.79e-17	2.11e-16	29.0149	Down-Regulated
AGAP11	-2.5895	4.8602	-12.9946	2.63e-24	8e-23	44.6604	Down-Regulated
AGBL1	-2.84041	2.61543	-13.5931	1.13e-25	4.21e-24	47.7974	Down-Regulated
AGER	-6.90283	11.9502	-20.217	1.18e-39	6.92e-37	79.791	Down-Regulated
AGMAT	2.83244	4.13786	13.8904	2.38e-26	9.75e-25	49.344	Up-Regulated
AGPAT4	-1.17617	7.99352	-8.79613	1.64e-14	1.31e-13	22.2471	Down-Regulated
AGR2	1.42676	11.5245	4.56462	1.26e-05	3.37e-05	2.15731	Up-Regulated
AGR3	-1.99927	9.4287	-4.9229	2.88e-06	8.33e-06	3.58529	Down-Regulated
AGRP	-3.16629	3.50989	-13.4504	2.38e-25	8.47e-24	47.0522	Down-Regulated
AGT	1.34074	6.67808	4.23898	4.56e-05	0.000112753	0.924843	Up-Regulated
AGTPBP1	-1.27754	9.07702	-15.8612	1.01e-30	9.54e-29	59.3563	Down-Regulated
AGTR1	-2.72998	5.93099	-14.0862	8.59e-27	3.76e-25	50.3577	Down-Regulated
AGTR2	-4.47668	6.85852	-9.40713	6.26e-16	6.06e-15	25.4886	Down-Regulated
AGXT2L1	1.02053	0.720822	3.71456	0.000315727	0.000688755	-0.916844	Up-Regulated
AHNAK	-2.0115	14.7506	-12.6919	1.31e-23	3.62e-22	43.0625	Down-Regulated
AHNAK2	1.47207	9.81074	5.51775	2.15e-07	7.17e-07	6.10614	Up-Regulated
AIF1L	-1.00362	9.05164	-5.27629	6.28e-07	1.97e-06	5.06168	Down-Regulated
AIM2	2.40796	5.52053	6.80442	4.84e-10	2.23e-09	12.081	Up-Regulated
AJAP1	-1.71196	3.25424	-6.49528	2.2e-09	9.39e-09	10.5902	Down-Regulated
AK1	-1.62114	10.739	-12.085	3.35e-22	7.38e-21	39.8387	Down-Regulated
AK3L1	2.82215	6.21171	11.4471	1.03e-20	1.85e-19	36.4289	Up-Regulated
AK7	-1.92137	6.27677	-6.86662	3.55e-10	1.66e-09	12.3845	Down-Regulated
AKAP12	-1.33726	10.367	-5.6712	1.07e-07	3.72e-07	6.78402	Down-Regulated
AKAP13	-1.0423	12.414	-8.47884	8.85e-14	6.46e-13	20.5796	Down-Regulated
AKAP14	-2.48444	3.15562	-5.68754	9.96e-08	3.46e-07	6.85682	Down-Regulated
AKAP2	-2.38799	10.9978	-15.4561	7.74e-30	5.82e-28	57.3345	Down-Regulated
AKAP5	-1.00775	6.97524	-7.29531	4.12e-11	2.17e-10	14.5064	Down-Regulated
AKAP7	-1.12679	7.19731	-10.2668	6.07e-18	7.59e-17	30.0915	Down-Regulated
AKR1B10	3.79471	3.62222	7.00674	1.77e-10	8.58e-10	13.0725	Up-Regulated
AKR1B15	2.77824	1.60106	7.46943	1.7e-11	9.43e-11	15.3819	Up-Regulated
AKR7A3	2.45864	3.58738	6.87661	3.38e-10	1.59e-09	12.4334	Up-Regulated
ALAS2	-2.82196	3.15552	-8.1423	5.2e-13	3.46e-12	18.8264	Down-Regulated
ALDH18A1	1.71503	10.3818	22.0734	3.78e-43	4.85e-40	87.7648	Up-Regulated
ALDH1A1	-2.25999	11.1655	-9.6179	2.01e-16	2.07e-15	26.6137	Down-Regulated
ALDH1A2	-2.60168	7.25003	-8.84475	1.27e-14	1.03e-13	22.5036	Down-Regulated
ALDH1B1	1.19886	9.28717	9.99753	2.6e-17	3e-16	28.6464	Up-Regulated
ALDH2	-1.62913	12.825	-11.2222	3.47e-20	5.8e-19	35.2226	Down-Regulated
ALDH3B1	-1.55532	11.222	-7.68319	5.67e-12	3.34e-11	16.4661	Down-Regulated
ALDH3B2	1.84889	6.18385	7.55442	1.1e-11	6.26e-11	15.8117	Up-Regulated
ALDOA	1.12846	14.1546	11.2729	2.64e-20	4.51e-19	35.495	Up-Regulated
ALG1L	2.91415	4.77584	8.6043	4.56e-14	3.44e-13	21.2374	Up-Regulated
ALG3	1.04703	9.52851	12.4329	5.21e-23	1.3e-21	41.6898	Up-Regulated
ALOX12P2	1.37933	3.16341	4.99279	2.14e-06	6.29e-06	3.87212	Up-Regulated
ALOX15	-3.08269	6.24789	-6.83237	4.21e-10	1.95e-09	12.2172	Down-Regulated
ALOX15B	-1.86074	9.85221	-5.96309	2.79e-08	1.04e-07	8.10163	Down-Regulated
ALOX5	-2.05385	10.6767	-11.1214	5.99e-20	9.72e-19	34.682	Down-Regulated
ALOX5AP	-2.03982	10.518	-9.56505	2.68e-16	2.71e-15	26.3313	Down-Regulated
ALOXE3	1.61196	1.94047	7.66876	6.1e-12	3.59e-11	16.3926	Up-Regulated
ALPK2	2.78641	3.79116	8.68218	3.01e-14	2.33e-13	21.6467	Up-Regulated
ALPL	-2.31806	11.1422	-7.89801	1.86e-12	1.16e-11	17.5655	Down-Regulated
ALPP	-3.4516	5.24888	-10.3098	4.81e-18	6.12e-17	30.3224	Down-Regulated
ALPPL2	-1.2535	3.66241	-3.29347	0.00131551	0.00263976	-2.25639	Down-Regulated
ALS2CL	-1.77059	9.09301	-10.4786	1.93e-18	2.57e-17	31.229	Down-Regulated
ALS2CR12	-1.97784	2.87978	-5.94612	3.02e-08	1.12e-07	8.02405	Down-Regulated
AMICA1	-2.11791	9.50346	-12.0072	5.09e-22	1.09e-20	39.4239	Down-Regulated
AMIGO1	-1.09672	6.93723	-8.17294	4.43e-13	2.97e-12	18.9852	Down-Regulated
AMOTL1	-1.64911	10.6906	-13.6622	7.84e-26	2.99e-24	48.1577	Down-Regulated
ANGPT1	-2.58613	8.73864	-12.0241	4.64e-22	1e-20	39.5142	Down-Regulated
ANGPT4	-3.87644	3.12531	-19.1133	1.73e-37	6.69e-35	74.8436	Down-Regulated
ANGPTL1	-2.92065	6.57126	-15.8424	1.11e-30	1.02e-28	59.2629	Down-Regulated
ANGPTL4	1.3152	8.39596	4.245	4.45e-05	0.000110438	0.947009	Up-Regulated
ANGPTL5	-2.35545	2.49152	-11.0462	8.98e-20	1.42e-18	34.2784	Down-Regulated
ANGPTL7	-4.29353	3.53645	-17.7699	9.19e-35	1.93e-32	68.6098	Down-Regulated
ANK3	-1.15287	10.0387	-6.97234	2.1e-10	1.01e-09	12.9031	Down-Regulated
ANKRD1	-5.25813	7.24835	-14.0954	8.19e-27	3.62e-25	50.4048	Down-Regulated
ANKRD20A3	-1.66555	2.95469	-8.08678	6.96e-13	4.57e-12	18.5389	Down-Regulated
ANKRD20B	-1.08047	2.29398	-6.03214	2.02e-08	7.66e-08	8.41843	Down-Regulated
ANKRD22	2.70403	7.52606	11.7413	2.12e-21	4.17e-20	38.0037	Up-Regulated
ANKRD29	-3.20131	8.30077	-14.1517	6.11e-27	2.76e-25	50.6957	Down-Regulated
ANKRD34B	2.6739	2.35476	8.20131	3.82e-13	2.58e-12	19.1325	Up-Regulated
ANKRD34C	-1.18198	1.06416	-6.08316	1.59e-08	6.1e-08	8.65377	Down-Regulated
ANKRD44	-1.15383	7.36672	-7.38972	2.55e-11	1.37e-10	14.9802	Down-Regulated
ANKRD56	1.12694	7.1956	6.63555	1.11e-09	4.91e-09	11.2628	Up-Regulated
ANKRD7	1.14986	1.20096	5.69546	9.6e-08	3.34e-07	6.89214	Up-Regulated
ANKS1A	-1.06002	10.6524	-11.6838	2.89e-21	5.56e-20	37.6963	Down-Regulated
ANKS4B	1.58552	1.27959	4.48914	1.71e-05	4.48e-05	1.86593	Up-Regulated
ANLN	3.72135	7.59783	15.9348	7.02e-31	6.8e-29	59.7213	Up-Regulated
ANO2	-2.41997	3.98567	-12.1628	2.21e-22	5.01e-21	40.2535	Down-Regulated
ANO5	-1.601	6.57251	-7.60515	8.47e-12	4.88e-11	16.0691	Down-Regulated
ANO7	1.63002	4.20059	11.0487	8.86e-20	1.41e-18	34.2915	Up-Regulated
ANXA10	1.62998	1.16965	4.37239	2.71e-05	6.93e-05	1.4219	Up-Regulated
ANXA3	-2.117	10.8756	-10.7465	4.54e-19	6.52e-18	32.6684	Down-Regulated
ANXA8	-3.5774	7.6021	-9.96681	3.07e-17	3.5e-16	28.4817	Down-Regulated
ANXA8L2	-3.94134	7.364	-11.5842	4.94e-21	9.25e-20	37.1634	Down-Regulated
AOC2	-1.3626	4.54427	-10.3975	2.99e-18	3.9e-17	30.7931	Down-Regulated
AOC3	-2.46452	11.6065	-15.5472	4.89e-30	3.77e-28	57.7906	Down-Regulated
AOX1	-1.76458	7.82538	-7.31629	3.71e-11	1.96e-10	14.6115	Down-Regulated
AP1S1	1.09888	9.6019	10.9391	1.6e-19	2.45e-18	33.7029	Up-Regulated
AP1S2	-1.0362	8.98632	-7.37162	2.8e-11	1.5e-10	14.8892	Down-Regulated
APBA2	1.33282	7.03869	5.7641	7.01e-08	2.49e-07	7.19946	Up-Regulated
APBB1	-1.5779	9.3013	-12.2954	1.09e-22	2.57e-21	40.9592	Down-Regulated
APCDD1L	2.98049	2.8525	9.00922	5.28e-15	4.48e-14	23.3736	Up-Regulated
APH1B	-1.00582	8.83453	-9.35936	8.09e-16	7.75e-15	25.234	Down-Regulated
APLN	-1.3906	8.52346	-5.29909	5.68e-07	1.79e-06	5.15912	Down-Regulated
APOA1	-2.66923	2.96751	-14.0734	9.18e-27	3.99e-25	50.2912	Down-Regulated
APOA5	-1.54753	1.32913	-8.82639	1.4e-14	1.13e-13	22.4067	Down-Regulated
APOB48R	-1.87419	9.1187	-10.4513	2.24e-18	2.96e-17	31.0825	Down-Regulated
APOBEC1	1.77186	0.931643	5.80986	5.68e-08	2.03e-07	7.40543	Up-Regulated
APOBEC3A	-1.08807	5.53003	-4.21757	4.95e-05	0.000121574	0.846098	Down-Regulated
APOBEC3B	2.01337	6.26981	8.33463	1.9e-13	1.33e-12	19.8262	Up-Regulated
APOBEC4	-2.63775	3.83771	-6.50556	2.1e-09	8.96e-09	10.6393	Down-Regulated
APOC1	-1.76169	11.337	-7.27293	4.62e-11	2.41e-10	14.3944	Down-Regulated
APOC2	-1.68662	7.77321	-5.6362	1.26e-07	4.32e-07	6.62847	Down-Regulated
APOC4	-1.11596	1.34787	-6.39577	3.57e-09	1.48e-08	10.1171	Down-Regulated
APOH	-2.23307	5.87351	-6.20504	8.9e-09	3.54e-08	9.21995	Down-Regulated
APOL3	-1.39786	10.0933	-9.50606	3.68e-16	3.67e-15	26.0164	Down-Regulated
APOL4	-1.07952	8.89327	-5.67204	1.07e-07	3.7e-07	6.78775	Down-Regulated
APOLD1	-1.44763	9.42482	-6.34646	4.52e-09	1.86e-08	9.88387	Down-Regulated
AQP1	-2.31644	13.8161	-9.41392	6.03e-16	5.85e-15	25.5248	Down-Regulated
AQP10	-1.88274	2.00859	-9.16425	2.3e-15	2.05e-14	24.196	Down-Regulated
AQP11	1.61463	3.84099	11.9296	7.71e-22	1.62e-20	39.0099	Up-Regulated
AQP4	-4.45429	11.5237	-11.5619	5.57e-21	1.03e-19	37.044	Down-Regulated
AQP5	-1.51216	7.76703	-3.12852	0.00222657	0.00431851	-2.74495	Down-Regulated
AQP7	-1.04114	4.3673	-3.22401	0.00164561	0.00325506	-2.46466	Down-Regulated
AQP9	-1.56312	8.71658	-5.92384	3.35e-08	1.23e-07	7.92238	Down-Regulated
AR	-1.02289	4.88337	-4.01283	0.000107187	0.000251003	0.108137	Down-Regulated
ARAP2	-1.22923	9.69903	-10.9317	1.67e-19	2.53e-18	33.6632	Down-Regulated
ARAP3	-1.30961	9.12584	-12.6089	2.04e-23	5.43e-22	42.623	Down-Regulated
ARC	-3.4103	5.66412	-12.8886	4.62e-24	1.34e-22	44.1015	Down-Regulated
ARHGAP11A	1.95143	7.36647	12.0651	3.73e-22	8.16e-21	39.7331	Up-Regulated
ARHGAP11B	1.79197	3.33937	8.84919	1.24e-14	1e-13	22.5271	Up-Regulated
ARHGAP18	-1.01344	10.5933	-9.52713	3.28e-16	3.29e-15	26.1289	Down-Regulated
ARHGAP23	-1.11209	10.123	-8.75883	2.01e-14	1.58e-13	22.0504	Down-Regulated
ARHGAP24	-1.38599	8.93164	-11.2412	3.14e-20	5.28e-19	35.3249	Down-Regulated
ARHGAP29	-1.27017	10.7018	-9.20203	1.88e-15	1.7e-14	24.3967	Down-Regulated
ARHGAP30	-1.23282	10.1609	-8.55084	6.05e-14	4.5e-13	20.9568	Down-Regulated
ARHGAP31	-2.13095	10.6031	-17.1949	1.45e-33	2.3e-31	65.8708	Down-Regulated
ARHGAP39	1.12689	7.66151	6.20247	9.01e-09	3.58e-08	9.20797	Up-Regulated
ARHGAP6	-2.63893	7.28589	-18.7664	8.55e-37	2.74e-34	73.2562	Down-Regulated
ARHGEF10	-1.08839	9.7035	-9.20882	1.81e-15	1.64e-14	24.4328	Down-Regulated
ARHGEF15	-2.42077	8.75689	-18.749	9.26e-37	2.93e-34	73.1762	Down-Regulated
ARHGEF16	1.50321	8.48198	12.4143	5.76e-23	1.42e-21	41.5911	Up-Regulated
ARHGEF19	1.17432	8.53963	8.99689	5.64e-15	4.76e-14	23.3082	Up-Regulated
ARHGEF37	-1.64249	7.884	-9.22454	1.67e-15	1.51e-14	24.5164	Down-Regulated
ARHGEF4	-1.54948	7.2412	-6.23156	7.84e-09	3.14e-08	9.34392	Down-Regulated
ARHGEF6	-1.48817	9.68748	-11.3549	1.7e-20	2.97e-19	35.9345	Down-Regulated
ARL14	1.89294	2.39085	5.4126	3.44e-07	1.12e-06	5.64791	Up-Regulated
ARL9	2.13317	2.02075	9.19542	1.95e-15	1.76e-14	24.3616	Up-Regulated
ARMC2	-1.00674	5.82367	-5.53655	1.97e-07	6.61e-07	6.18863	Down-Regulated
ARMC3	-1.17954	5.58564	-2.74528	0.00701831	0.0125357	-3.79712	Down-Regulated
ARMC4	-1.80742	5.34416	-4.39421	2.49e-05	6.39e-05	1.50426	Down-Regulated
ARMCX1	-1.03553	8.49623	-8.88733	1.01e-14	8.29e-14	22.7286	Down-Regulated
ARNT2	-1.10528	8.92195	-5.625	1.32e-07	4.53e-07	6.57881	Down-Regulated
ARNTL2	2.53671	6.14179	9.84999	5.76e-17	6.36e-16	27.8556	Up-Regulated
ARRB1	-1.45257	10.214	-13.288	5.59e-25	1.86e-23	46.2021	Down-Regulated
ARRDC4	-1.36521	9.373	-9.22513	1.66e-15	1.51e-14	24.5195	Down-Regulated
ARSE	1.13834	7.52722	4.22614	4.79e-05	0.000117978	0.877574	Up-Regulated
ARSH	1.60698	0.88864	8.94244	7.54e-15	6.27e-14	23.02	Up-Regulated
ART1	-1.22893	1.04989	-8.15997	4.74e-13	3.16e-12	18.918	Down-Regulated
ART4	-2.44186	4.33446	-11.1205	6.02e-20	9.76e-19	34.6769	Down-Regulated
ART5	-1.14977	3.06601	-5.46947	2.67e-07	8.79e-07	5.89511	Down-Regulated
ARTN	1.58447	3.47449	6.83298	4.2e-10	1.95e-09	12.2202	Up-Regulated
ASAH2B	1.38185	2.19997	6.42987	3.02e-09	1.27e-08	10.2788	Up-Regulated
ASF1B	2.29716	7.24884	13.8696	2.65e-26	1.08e-24	49.2359	Up-Regulated
ASNS	1.3723	8.63967	11.4863	8.36e-21	1.51e-19	36.6391	Up-Regulated
ASPA	-2.86072	4.04698	-13.9082	2.17e-26	8.94e-25	49.4363	Down-Regulated
ASPG	-3.50621	3.91698	-8.34587	1.79e-13	1.26e-12	19.8848	Down-Regulated
ASPHD1	1.93794	5.44528	7.42223	2.16e-11	1.18e-10	15.1438	Up-Regulated
ASPHD2	1.13748	6.36924	6.56814	1.55e-09	6.71e-09	10.9388	Up-Regulated
ASPM	3.47168	6.53627	15.2475	2.22e-29	1.52e-27	56.2858	Up-Regulated
ASPRV1	-1.2836	5.2186	-11.1629	4.78e-20	7.86e-19	34.9049	Down-Regulated
ASTN1	-1.17226	2.71079	-4.08643	8.14e-05	0.000193661	0.370247	Down-Regulated
ATAD2	1.58405	8.88291	10.2812	5.62e-18	7.06e-17	30.1685	Up-Regulated
ATAD3A	1.03847	8.96959	11.0301	9.8e-20	1.55e-18	34.1916	Up-Regulated
ATAD3B	1.06006	7.92357	8.00492	1.07e-12	6.86e-12	18.116	Up-Regulated
ATAD5	1.57187	5.74156	9.87781	4.96e-17	5.55e-16	28.0047	Up-Regulated
ATF3	-1.71355	10.526	-7.51658	1.33e-11	7.51e-11	15.6201	Down-Regulated
ATG9B	1.3626	4.94292	5.50886	2.24e-07	7.44e-07	6.06724	Up-Regulated
ATIC	1.28593	10.3721	18.0197	2.81e-35	6.71e-33	69.7869	Up-Regulated
ATOH8	-3.01701	9.54136	-10.092	1.56e-17	1.85e-16	29.1531	Down-Regulated
ATP10A	-1.35857	9.1146	-7.43054	2.07e-11	1.13e-10	15.1857	Down-Regulated
ATP10B	4.72265	4.53347	14.0235	1.19e-26	5.08e-25	50.0333	Up-Regulated
ATP12A	-1.39509	3.35847	-3.3004	0.0012862	0.00258449	-2.2354	Down-Regulated
ATP13A4	-2.94924	9.1817	-9.04671	4.32e-15	3.72e-14	23.5722	Down-Regulated
ATP13A5	-1.15817	2.11885	-4.5598	1.29e-05	3.44e-05	2.13862	Down-Regulated
ATP1A2	-3.01225	5.97355	-11.2522	2.95e-20	5e-19	35.3839	Down-Regulated
ATP1A3	1.03388	4.1507	3.92218	0.000149723	0.000343259	-0.209805	Up-Regulated
ATP1B2	-1.71486	6.04226	-9.92074	3.94e-17	4.44e-16	28.2347	Down-Regulated
ATP6V1B1	-1.12726	5.12011	-3.65242	0.000392619	0.000845622	-1.12261	Down-Regulated
ATP6V1C2	1.27253	6.10656	8.85865	1.18e-14	9.58e-14	22.5771	Up-Regulated
ATP8A1	-1.62469	10.076	-9.0922	3.39e-15	2.94e-14	23.8135	Down-Regulated
ATP8A2	-1.711	5.06373	-7.93493	1.54e-12	9.66e-12	17.7554	Down-Regulated
AURKA	2.35696	7.34652	13.3564	3.9e-25	1.33e-23	46.5604	Up-Regulated
AURKAPS1	1.05101	3.11261	6.9486	2.36e-10	1.13e-09	12.7864	Up-Regulated
AURKB	3.38088	5.56324	14.6583	4.48e-28	2.46e-26	53.2965	Up-Regulated
AVL9	1.27265	8.43016	12.7632	8.99e-24	2.54e-22	43.4392	Up-Regulated
AVPR2	-2.67456	4.20564	-15.1	4.69e-29	3.11e-27	55.541	Down-Regulated
AWAT2	-2.28099	2.18826	-9.02088	4.96e-15	4.24e-14	23.4353	Down-Regulated
AXIN2	-1.29561	8.90387	-8.27045	2.66e-13	1.83e-12	19.4919	Down-Regulated
AXL	-1.00871	10.694	-6.29681	5.74e-09	2.34e-08	9.64995	Down-Regulated
AZU1	-1.51979	2.69956	-5.41305	3.43e-07	1.12e-06	5.64985	Down-Regulated
B3GALNT1	-1.13353	8.9004	-7.39392	2.5e-11	1.35e-10	15.0013	Down-Regulated
B3GALT2	-1.67885	5.44828	-7.57814	9.73e-12	5.57e-11	15.932	Down-Regulated
B3GNT3	4.17556	7.2078	15.3128	1.6e-29	1.13e-27	56.6145	Up-Regulated
B3GNT4	2.22757	3.24951	8.61808	4.24e-14	3.21e-13	21.3098	Up-Regulated
B3GNT6	3.91523	3.72052	8.88189	1.04e-14	8.51e-14	22.6998	Up-Regulated
B3GNT8	-1.28845	8.41255	-6.40629	3.39e-09	1.41e-08	10.1669	Down-Regulated
B3GNTL1	1.0011	6.17473	8.59676	4.74e-14	3.57e-13	21.1978	Up-Regulated
B4GALNT1	2.13716	4.70029	7.28134	4.43e-11	2.31e-10	14.4365	Up-Regulated
B4GALNT2	1.05716	2.50072	2.59217	0.0107748	0.0186389	-4.18389	Up-Regulated
B4GALNT4	3.65872	4.07421	9.31869	1.01e-15	9.48e-15	25.0174	Up-Regulated
B4GALT2	1.18833	9.61538	14.5507	7.79e-28	4.05e-26	52.7462	Up-Regulated
BAALC	-1.83418	7.07315	-6.68557	8.69e-10	3.89e-09	11.5042	Down-Regulated
BACE2	1.16359	9.85257	6.61875	1.21e-09	5.31e-09	11.1819	Up-Regulated
BAI2	1.64837	5.72729	7.23695	5.54e-11	2.86e-10	14.2147	Up-Regulated
BAI3	-2.37509	4.28558	-10.8343	2.82e-19	4.16e-18	33.14	Down-Regulated
BAIAP2L1	1.05102	10.2466	9.85074	5.74e-17	6.34e-16	27.8596	Up-Regulated
BAIAP2L2	2.12803	3.49138	7.41994	2.19e-11	1.19e-10	15.1323	Up-Regulated
BARD1	1.23581	6.00107	9.27677	1.26e-15	1.16e-14	24.7943	Up-Regulated
BARX1	4.06999	2.82809	8.00922	1.04e-12	6.71e-12	18.1382	Up-Regulated
BARX2	3.30488	4.9442	8.72542	2.4e-14	1.87e-13	21.8744	Up-Regulated
BASP1	1.53164	9.63637	8.14983	5e-13	3.33e-12	18.8654	Up-Regulated
BCAM	-1.00824	12.4681	-6.2015	9.05e-09	3.59e-08	9.20344	Down-Regulated
BCAN	1.2912	2.6136	5.70907	9.02e-08	3.15e-07	6.9529	Up-Regulated
BCHE	-2.86585	6.58845	-13.269	6.18e-25	2.04e-23	46.1024	Down-Regulated
BCL2A1	-1.26618	8.22378	-5.83198	5.13e-08	1.84e-07	7.50534	Down-Regulated
BCL2L10	1.97946	1.31888	9.98247	2.82e-17	3.24e-16	28.5656	Up-Regulated
BCL2L15	2.94509	6.09075	10.8301	2.89e-19	4.24e-18	33.1172	Up-Regulated
BCL2L2	-1.14852	10.1592	-15.0533	5.95e-29	3.83e-27	55.3047	Down-Regulated
BCL6B	-1.68596	8.74559	-12.3004	1.06e-22	2.51e-21	40.9857	Down-Regulated
BCL9	1.30567	9.38449	11.2125	3.66e-20	6.09e-19	35.1707	Up-Regulated
BCMO1	1.28213	3.52215	4.45415	1.96e-05	5.11e-05	1.73197	Up-Regulated
BCO2	-1.55623	4.58619	-6.60551	1.29e-09	5.64e-09	11.1182	Down-Regulated
BDH1	1.10069	7.87225	8.06795	7.68e-13	5.02e-12	18.4415	Up-Regulated
BDNF	-3.38548	5.97438	-14.4343	1.42e-27	7.08e-26	52.1501	Down-Regulated
BEAN	2.66565	5.4997	9.9504	3.35e-17	3.82e-16	28.3937	Up-Regulated
BEND6	1.81207	4.76612	8.4225	1.19e-13	8.58e-13	20.2849	Up-Regulated
BEST1	-1.24919	6.09129	-8.76939	1.9e-14	1.5e-13	22.1061	Down-Regulated
BET3L	-1.20373	1.30782	-8.85512	1.2e-14	9.75e-14	22.5584	Down-Regulated
BEX1	-2.14685	3.63023	-7.35698	3.01e-11	1.61e-10	14.8156	Down-Regulated
BEX4	-1.11822	9.53095	-7.84	2.52e-12	1.54e-11	17.2677	Down-Regulated
BEX5	-1.71215	6.12971	-7.03382	1.54e-10	7.55e-10	13.2061	Down-Regulated
BHLHA15	1.90646	3.33517	9.09945	3.26e-15	2.84e-14	23.852	Up-Regulated
BHLHE41	-1.03339	9.23259	-6.14254	1.2e-08	4.68e-08	8.92891	Down-Regulated
BHMT2	1.07457	5.6557	2.84546	0.00525223	0.00961035	-3.53352	Up-Regulated
BIK	1.42316	5.61941	7.00363	1.79e-10	8.71e-10	13.0572	Up-Regulated
BIRC5	3.86097	6.11407	15.301	1.69e-29	1.19e-27	56.5552	Up-Regulated
BLM	2.12883	6.00218	12.9745	2.93e-24	8.81e-23	44.5542	Up-Regulated
BMP2	-1.97922	9.56625	-9.94128	3.52e-17	3.99e-16	28.3448	Down-Regulated
BMP3	-1.34256	8.55941	-4.18019	5.71e-05	0.000138834	0.709346	Down-Regulated
BMP5	-1.77779	7.07225	-7.29855	4.06e-11	2.13e-10	14.5226	Down-Regulated
BMP6	-1.72589	7.6512	-6.79981	4.95e-10	2.28e-09	12.0586	Down-Regulated
BMP8A	2.32208	6.50576	11.1268	5.81e-20	9.46e-19	34.711	Up-Regulated
BMPER	-3.20294	6.08345	-12.7067	1.21e-23	3.37e-22	43.1407	Down-Regulated
BMPR1B	-1.14376	6.4641	-4.13121	6.88e-05	0.000165473	0.531506	Down-Regulated
BMPR2	-1.18921	11.7701	-11.808	1.48e-21	3.01e-20	38.3606	Down-Regulated
BMX	-3.0043	4.61587	-13.7074	6.19e-26	2.41e-24	48.3929	Down-Regulated
BNIPL	-1.8098	7.26838	-6.14998	1.16e-08	4.53e-08	8.96349	Down-Regulated
BOLA2	1.02991	9.59435	9.35057	8.48e-16	8.1e-15	25.1872	Up-Regulated
BOP1	1.86571	7.26419	9.59832	2.24e-16	2.29e-15	26.5091	Up-Regulated
BPHL	1.17838	8.12962	11.5333	6.49e-21	1.2e-19	36.8909	Up-Regulated
BRCA1	1.26077	7.48645	8.61395	4.33e-14	3.28e-13	21.2881	Up-Regulated
BRDT	2.88796	1.92003	5.6927	9.73e-08	3.38e-07	6.8798	Up-Regulated
BRI3BP	1.34334	6.20936	11.0206	1.03e-19	1.62e-18	34.1405	Up-Regulated
BRIP1	2.71102	4.93352	13.7968	3.88e-26	1.55e-24	48.858	Up-Regulated
BRIX1	1.04675	9.14201	11.63	3.86e-21	7.32e-20	37.4087	Up-Regulated
BRSK1	2.31018	4.51108	9.75861	9.44e-17	1.01e-15	27.3663	Up-Regulated
BST1	-1.32494	7.3634	-8.31717	2.08e-13	1.45e-12	19.7352	Down-Regulated
BTG2	-1.49663	11.9899	-8.02989	9.37e-13	6.06e-12	18.2449	Down-Regulated
BTK	-1.60998	8.64477	-8.5434	6.29e-14	4.67e-13	20.9178	Down-Regulated
BTNL3	-1.31688	1.27294	-4.49992	1.64e-05	4.3e-05	1.90731	Down-Regulated
BTNL8	-2.5997	3.56316	-10.2763	5.76e-18	7.23e-17	30.1425	Down-Regulated
BTNL9	-4.4094	7.7001	-18.3805	5.15e-36	1.43e-33	71.4721	Down-Regulated
BUB1	2.7323	7.1334	13.336	4.34e-25	1.47e-23	46.4539	Up-Regulated
BUB1B	3.6443	6.11366	16.6404	2.15e-32	2.64e-30	63.1894	Up-Regulated
BYSL	1.16956	8.34754	11.6812	2.93e-21	5.63e-20	37.6826	Up-Regulated
BZW2	1.28632	10.2488	12.3884	6.61e-23	1.61e-21	41.4536	Up-Regulated
C10orf10	-1.07648	11.7594	-4.62105	1e-05	2.72e-05	2.37739	Down-Regulated
C10orf105	-1.82575	3.96984	-9.74641	1.01e-16	1.07e-15	27.301	Down-Regulated
C10orf107	-2.65913	4.91	-7.7457	4.1e-12	2.46e-11	16.7851	Down-Regulated
C10orf116	-3.33322	10.0318	-15.4529	7.86e-30	5.87e-28	57.3184	Down-Regulated
C10orf128	-1.70367	5.58835	-8.44224	1.07e-13	7.75e-13	20.3881	Down-Regulated
C10orf140	-1.02799	3.86753	-5.10082	1.35e-06	4.06e-06	4.32054	Down-Regulated
C10orf2	1.25348	7.58246	11.7754	1.76e-21	3.53e-20	38.1864	Up-Regulated
C10orf25	-1.2262	6.22786	-10.5337	1.43e-18	1.95e-17	31.5251	Down-Regulated
C10orf54	-1.57636	10.7599	-13.0221	2.28e-24	6.95e-23	44.8054	Down-Regulated
C10orf55	1.08919	3.7787	4.52047	1.51e-05	3.98e-05	1.98647	Up-Regulated
C10orf67	-4.62077	4.08168	-23.4827	1.11e-45	3.78e-42	93.5358	Down-Regulated
C10orf72	-1.10402	9.16417	-7.69395	5.36e-12	3.17e-11	16.521	Down-Regulated
C10orf79	-2.2333	6.12948	-5.51283	2.2e-07	7.32e-07	6.0846	Down-Regulated
C10orf93	-1.04031	2.6289	-3.66083	0.000381271	0.000822821	-1.09495	Down-Regulated
C11orf16	-1.9211	4.27135	-4.7095	7e-06	1.93e-05	2.72603	Down-Regulated
C11orf21	-1.97136	4.81137	-9.90816	4.21e-17	4.75e-16	28.1673	Down-Regulated
C11orf24	1.02018	9.5555	13.1818	9.79e-25	3.13e-23	45.6451	Up-Regulated
C11orf41	1.21164	4.17339	4.97547	2.3e-06	6.74e-06	3.80078	Up-Regulated
C11orf66	-2.43809	5.2158	-7.39839	2.44e-11	1.32e-10	15.0238	Down-Regulated
C11orf80	1.17532	7.74871	11.9386	7.35e-22	1.55e-20	39.0582	Up-Regulated
C11orf85	1.3012	1.13755	4.87878	3.46e-06	9.93e-06	3.40557	Up-Regulated
C11orf86	3.08311	1.71104	8.6253	4.08e-14	3.1e-13	21.3477	Up-Regulated
C11orf88	-3.36896	5.01583	-7.18337	7.27e-11	3.7e-10	13.9476	Down-Regulated
C11orf9	-2.88084	9.78638	-10.5498	1.31e-18	1.79e-17	31.6114	Down-Regulated
C11orf92	-2.31246	7.84329	-7.75678	3.87e-12	2.33e-11	16.8417	Down-Regulated
C12orf36	2.08267	1.40496	6.35779	4.28e-09	1.77e-08	9.93736	Up-Regulated
C12orf48	1.76462	5.76584	11.1386	5.45e-20	8.92e-19	34.7743	Up-Regulated
C12orf49	-1.19059	10.3461	-12.8718	5.05e-24	1.46e-22	44.0129	Down-Regulated
C12orf56	1.90859	1.32149	5.91848	3.43e-08	1.26e-07	7.89795	Up-Regulated
C12orf63	-1.02347	3.15396	-3.00117	0.00329913	0.00623733	-3.10763	Down-Regulated
C12orf69	-1.61389	4.19604	-8.30297	2.24e-13	1.56e-12	19.6612	Down-Regulated
C12orf70	1.26239	1.08781	7.06166	1.34e-10	6.61e-10	13.3437	Up-Regulated
C13orf1	-1.32286	8.70528	-16.3092	1.09e-31	1.21e-29	61.5695	Down-Regulated
C13orf15	-2.89392	11.0762	-20.0562	2.42e-39	1.24e-36	79.0798	Down-Regulated
C13orf30	-3.20631	6.47405	-6.50194	2.13e-09	9.1e-09	10.622	Down-Regulated
C13orf36	-6.35811	5.0918	-24.0418	1.16e-46	7.42e-43	95.7603	Down-Regulated
C13orf38	2.12708	2.17478	9.24803	1.47e-15	1.34e-14	24.6413	Up-Regulated
C14orf105	1.37964	1.01504	4.99288	2.14e-06	6.29e-06	3.8725	Up-Regulated
C14orf132	-2.63817	9.61509	-16.8831	6.56e-33	9.44e-31	64.3675	Down-Regulated
C14orf139	-2.21089	6.814	-13.498	1.85e-25	6.75e-24	47.301	Down-Regulated
C14orf180	-1.19207	1.40182	-6.1907	9.53e-09	3.77e-08	9.15304	Down-Regulated
C14orf37	1.01466	5.57637	5.53594	1.98e-07	6.62e-07	6.18595	Up-Regulated
C14orf49	-1.51153	5.63132	-8.03159	9.29e-13	6.01e-12	18.2537	Down-Regulated
C14orf50	-1.33619	3.96278	-4.50981	1.57e-05	4.14e-05	1.94538	Down-Regulated
C14orf73	-1.20339	4.15117	-5.50675	2.26e-07	7.51e-07	6.05797	Down-Regulated
C14orf86	-1.53166	1.61181	-6.42952	3.03e-09	1.27e-08	10.2771	Down-Regulated
C15orf26	-2.58599	3.48808	-7.68371	5.65e-12	3.33e-11	16.4688	Down-Regulated
C15orf42	2.51079	4.94436	12.6337	1.79e-23	4.8e-22	42.7542	Up-Regulated
C15orf48	2.77688	8.04156	8.78335	1.76e-14	1.4e-13	22.1797	Up-Regulated
C15orf51	-1.43636	2.34105	-8.88687	1.01e-14	8.31e-14	22.7262	Down-Regulated
C15orf52	-1.35975	8.55964	-8.67365	3.15e-14	2.43e-13	21.6019	Down-Regulated
C15orf54	1.02042	1.60312	5.58507	1.59e-07	5.38e-07	6.40223	Up-Regulated
C15orf59	-2.03679	5.29241	-11.1538	5.03e-20	8.25e-19	34.8558	Down-Regulated
C16orf54	-1.36674	7.42264	-7.12151	9.93e-11	4.97e-10	13.6402	Down-Regulated
C16orf59	3.26551	4.68691	18.0676	2.24e-35	5.55e-33	70.0115	Up-Regulated
C16orf71	-1.21519	5.16786	-3.87669	0.000176719	0.000400491	-0.367241	Down-Regulated
C16orf75	2.13651	6.88101	15.0192	7.08e-29	4.51e-27	55.132	Up-Regulated
C16orf86	-1.19259	5.39263	-10.5044	1.68e-18	2.26e-17	31.3675	Down-Regulated
C16orf88	1.27107	7.88129	15.8926	8.66e-31	8.24e-29	59.512	Up-Regulated
C16orf89	-2.14965	11.2894	-6.05596	1.8e-08	6.88e-08	8.52817	Down-Regulated
C17orf103	-1.22304	8.84424	-9.85928	5.48e-17	6.08e-16	27.9054	Down-Regulated
C17orf104	1.08348	3.49582	3.9762	0.00012276	0.00028513	-0.0210032	Up-Regulated
C17orf108	-1.1446	7.62714	-8.94564	7.41e-15	6.17e-14	23.0369	Down-Regulated
C17orf53	2.39112	5.25118	13.9748	1.53e-26	6.38e-25	49.7814	Up-Regulated
C17orf72	-1.19702	7.18742	-4.89924	3.18e-06	9.15e-06	3.48878	Down-Regulated
C17orf87	-1.66299	6.22144	-8.23288	3.24e-13	2.21e-12	19.2965	Down-Regulated
C17orf91	-1.63515	8.29301	-12.0195	4.76e-22	1.03e-20	39.4895	Down-Regulated
C17orf96	1.43511	6.48827	8.0502	8.43e-13	5.48e-12	18.3498	Up-Regulated
C18orf16	-1.83588	2.54715	-6.22448	8.11e-09	3.24e-08	9.31079	Down-Regulated
C18orf34	-1.42129	2.30257	-5.01978	1.91e-06	5.64e-06	3.9836	Down-Regulated
C18orf56	1.94576	2.56352	10.2292	7.44e-18	9.17e-17	29.8893	Up-Regulated
C19orf26	1.69608	2.88355	6.41906	3.19e-09	1.33e-08	10.2275	Up-Regulated
C19orf35	-1.01735	4.24393	-5.75734	7.23e-08	2.56e-07	7.16907	Down-Regulated
C19orf38	-1.18236	5.81088	-6.33354	4.81e-09	1.97e-08	9.82292	Down-Regulated
C19orf40	1.28977	5.03059	10.2619	6.23e-18	7.77e-17	30.0651	Up-Regulated
C19orf45	1.09776	1.26893	5.26021	6.74e-07	2.11e-06	4.99311	Up-Regulated
C19orf48	1.09868	8.86874	9.23068	1.61e-15	1.47e-14	24.549	Up-Regulated
C19orf51	-1.04176	6.10829	-2.99473	0.00336435	0.00635186	-3.12563	Down-Regulated
C19orf59	-4.84102	8.91443	-15.144	3.75e-29	2.53e-27	55.7636	Down-Regulated
C19orf69	-1.12584	1.17078	-7.3731	2.78e-11	1.49e-10	14.8966	Down-Regulated
C19orf76	-1.29161	4.56374	-8.67416	3.15e-14	2.43e-13	21.6046	Down-Regulated
C19orf77	1.56894	1.96156	5.88084	4.09e-08	1.49e-07	7.72672	Up-Regulated
C1orf106	2.00594	9.4526	11.0151	1.06e-19	1.67e-18	34.1113	Up-Regulated
C1orf107	1.02828	8.98495	14.3769	1.91e-27	9.37e-26	51.8551	Up-Regulated
C1orf110	-2.16733	2.79318	-6.04071	1.94e-08	7.37e-08	8.45792	Down-Regulated
C1orf112	1.73289	6.59833	15.2609	2.07e-29	1.43e-27	56.3531	Up-Regulated
C1orf114	-1.82669	4.81138	-5.56546	1.73e-07	5.84e-07	6.31577	Down-Regulated
C1orf115	-1.84193	9.55127	-10.7136	5.42e-19	7.74e-18	32.4917	Down-Regulated
C1orf116	-1.54581	12.1189	-5.91359	3.51e-08	1.29e-07	7.87567	Down-Regulated
C1orf126	1.49332	5.4024	8.66854	3.24e-14	2.5e-13	21.575	Up-Regulated
C1orf129	-2.53099	2.84495	-6.77254	5.66e-10	2.58e-09	11.9258	Down-Regulated
C1orf135	2.06361	4.44629	11.9325	7.59e-22	1.6e-20	39.0255	Up-Regulated
C1orf141	-2.1394	2.18766	-5.72264	8.48e-08	2.97e-07	7.01357	Down-Regulated
C1orf150	-1.90726	3.86505	-7.4175	2.21e-11	1.21e-10	15.12	Down-Regulated
C1orf158	-2.81471	3.41856	-6.6702	9.37e-10	4.17e-09	11.43	Down-Regulated
C1orf162	-1.94925	9.16377	-11.4683	9.21e-21	1.66e-19	36.5425	Down-Regulated
C1orf168	-2.86797	4.76787	-9.15498	2.42e-15	2.15e-14	24.1467	Down-Regulated
C1orf170	2.41086	4.11745	14.3529	2.16e-27	1.05e-25	51.7317	Up-Regulated
C1orf173	-3.13612	5.72846	-6.35504	4.34e-09	1.79e-08	9.92439	Down-Regulated
C1orf182	1.90413	1.5239	9.08537	3.51e-15	3.05e-14	23.7772	Up-Regulated
C1orf183	-1.57932	6.27516	-13.5391	1.49e-25	5.51e-24	47.5159	Down-Regulated
C1orf186	-1.97813	5.09451	-8.2635	2.76e-13	1.89e-12	19.4558	Down-Regulated
C1orf189	-1.78877	1.83314	-5.41193	3.45e-07	1.12e-06	5.64502	Down-Regulated
C1orf192	-1.42195	6.00552	-4.60545	1.07e-05	2.88e-05	2.31634	Down-Regulated
C1orf194	-2.9331	4.75021	-5.97353	2.65e-08	9.92e-08	8.14939	Down-Regulated
C1orf198	-1.24191	11.7452	-13.1551	1.13e-24	3.54e-23	45.5048	Down-Regulated
C1orf21	-1.50059	10.0061	-11.1032	6.6e-20	1.06e-18	34.5844	Down-Regulated
C1orf220	1.50854	2.24127	8.74106	2.2e-14	1.73e-13	21.9568	Up-Regulated
C1orf228	-1.28573	4.68842	-6.81849	4.51e-10	2.08e-09	12.1495	Down-Regulated
C1orf230	-2.32144	2.84259	-6.92867	2.61e-10	1.24e-09	12.6885	Down-Regulated
C1orf38	-1.04583	10.3852	-7.95809	1.36e-12	8.61e-12	17.8746	Down-Regulated
C1orf51	1.10374	6.1546	4.83691	4.13e-06	1.17e-05	3.23602	Up-Regulated
C1orf61	2.72686	1.9795	8.88629	1.02e-14	8.33e-14	22.7231	Up-Regulated
C1orf65	2.01464	1.29486	9.35913	8.1e-16	7.75e-15	25.2328	Up-Regulated
C1orf69	-1.0043	7.96982	-10.6454	7.84e-19	1.1e-17	32.1252	Down-Regulated
C1orf74	1.43073	5.96757	15.0843	5.08e-29	3.32e-27	55.4614	Up-Regulated
C1orf87	-3.691	4.44388	-8.6273	4.03e-14	3.07e-13	21.3582	Down-Regulated
C1orf88	-1.70503	8.11895	-5.59123	1.54e-07	5.24e-07	6.42944	Down-Regulated
C1orf92	-3.04406	3.59394	-6.7561	6.14e-10	2.79e-09	11.846	Down-Regulated
C1QA	-1.84092	12.569	-8.93017	8.05e-15	6.67e-14	22.9551	Down-Regulated
C1QB	-1.85931	12.7592	-8.49616	8.08e-14	5.91e-13	20.6702	Down-Regulated
C1QC	-1.27697	12.3385	-6.01905	2.14e-08	8.12e-08	8.35825	Down-Regulated
C1QL1	1.27378	2.06324	5.24212	7.3e-07	2.27e-06	4.91615	Up-Regulated
C1QL2	1.47831	1.65743	3.80439	0.00022939	0.000510446	-0.614598	Up-Regulated
C1QTNF2	-1.95818	5.47034	-11.5191	7.01e-21	1.29e-19	36.8147	Down-Regulated
C1QTNF6	2.20341	8.03707	12.3698	7.3e-23	1.77e-21	41.3543	Up-Regulated
C1QTNF7	-2.74911	7.13193	-12.7052	1.22e-23	3.4e-22	43.1327	Down-Regulated
C2	-1.61669	11.7889	-8.45937	9.81e-14	7.12e-13	20.4777	Down-Regulated
C20orf103	1.58703	5.79669	5.87467	4.21e-08	1.53e-07	7.69871	Up-Regulated
C20orf151	1.76207	4.89413	8.44945	1.03e-13	7.48e-13	20.4258	Up-Regulated
C20orf160	-2.66291	7.04555	-18.8616	5.5e-37	1.88e-34	73.6933	Down-Regulated
C20orf186	1.01945	0.609761	3.84633	0.000197259	0.000443417	-0.471561	Up-Regulated
C20orf194	-1.45462	9.30069	-14.3495	2.2e-27	1.07e-25	51.7142	Down-Regulated
C20orf197	1.18934	3.12608	4.17404	5.84e-05	0.000141945	0.686919	Up-Regulated
C20orf20	1.01809	8.26457	14.5735	6.93e-28	3.67e-26	52.8627	Up-Regulated
C20orf202	-2.50339	3.85406	-17.2379	1.18e-33	1.93e-31	66.077	Down-Regulated
C20orf24	1.11696	10.5595	9.95016	3.36e-17	3.82e-16	28.3924	Up-Regulated
C20orf26	-2.12558	4.11351	-5.54606	1.89e-07	6.35e-07	6.23039	Down-Regulated
C20orf46	-2.04028	5.89676	-13.7245	5.66e-26	2.22e-24	48.482	Down-Regulated
C20orf56	-2.51229	8.03667	-7.18444	7.23e-11	3.69e-10	13.9529	Down-Regulated
C20orf70	1.72429	1.75158	4.73331	6.34e-06	1.76e-05	2.82064	Up-Regulated
C20orf85	-3.743	6.25527	-6.73655	6.76e-10	3.06e-09	11.7511	Down-Regulated
C21orf125	1.90605	3.21001	5.93788	3.14e-08	1.16e-07	7.98639	Up-Regulated
C21orf128	-1.74979	3.24531	-5.23465	7.54e-07	2.34e-06	4.88441	Down-Regulated
C21orf15	-1.18816	2.75048	-4.73977	6.18e-06	1.71e-05	2.84637	Down-Regulated
C21orf34	-1.91096	4.4939	-10.0472	1.99e-17	2.33e-16	28.9129	Down-Regulated
C21orf45	1.13342	7.26777	11.3568	1.68e-20	2.94e-19	35.945	Up-Regulated
C21orf62	-1.26599	1.56665	-5.8974	3.79e-08	1.39e-07	7.80197	Down-Regulated
C22orf15	-2.27228	3.73426	-6.10004	1.46e-08	5.66e-08	8.73183	Down-Regulated
C22orf34	-1.23785	2.87698	-5.17759	9.67e-07	2.97e-06	4.64288	Down-Regulated
C22orf41	1.09012	1.82244	4.77862	5.26e-06	1.47e-05	3.00158	Up-Regulated
C2CD4A	3.29007	5.32995	10.2964	5.17e-18	6.53e-17	30.25	Up-Regulated
C2CD4D	1.64109	2.9329	7.99502	1.12e-12	7.2e-12	18.0649	Up-Regulated
C2orf27A	1.15223	3.38878	6.52863	1.87e-09	8.06e-09	10.7495	Up-Regulated
C2orf39	-2.65772	5.09853	-5.50745	2.25e-07	7.49e-07	6.06106	Down-Regulated
C2orf40	-3.53877	5.99637	-11.689	2.81e-21	5.43e-20	37.7243	Down-Regulated
C2orf48	1.43284	1.55544	7.48079	1.6e-11	8.93e-11	15.4392	Up-Regulated
C2orf50	-1.04993	3.56534	-3.42872	0.00084264	0.00173393	-1.84037	Down-Regulated
C2orf54	-1.92309	8.28141	-7.4174	2.22e-11	1.21e-10	15.1195	Down-Regulated
C2orf55	-1.09987	8.53409	-7.12466	9.77e-11	4.91e-10	13.6558	Down-Regulated
C2orf58	-1.17189	3.48833	-5.50744	2.25e-07	7.49e-07	6.06102	Down-Regulated
C2orf62	-2.4018	4.03882	-6.89879	3.03e-10	1.43e-09	12.542	Down-Regulated
C2orf65	-1.56363	4.01399	-7.75095	3.99e-12	2.39e-11	16.8119	Down-Regulated
C2orf71	-3.83946	3.21644	-16.8426	7.99e-33	1.11e-30	64.1714	Down-Regulated
C2orf73	-1.8149	2.78088	-6.37724	3.9e-09	1.62e-08	10.0293	Down-Regulated
C2orf77	-1.61004	7.4635	-7.16102	8.14e-11	4.13e-10	13.8364	Down-Regulated
C3orf15	-2.18567	6.13581	-6.89676	3.06e-10	1.44e-09	12.5321	Down-Regulated
C3orf16	-2.25885	3.0295	-5.81299	5.6e-08	2e-07	7.41957	Down-Regulated
C3orf30	1.05445	0.730841	5.28725	5.99e-07	1.89e-06	5.10849	Up-Regulated
C3orf36	-1.36196	4.43597	-5.63621	1.26e-07	4.32e-07	6.62849	Down-Regulated
C3orf42	-1.01313	3.98863	-7.97862	1.22e-12	7.8e-12	17.9804	Down-Regulated
C3orf50	-1.02081	1.1893	-6.26736	6.61e-09	2.67e-08	9.51163	Down-Regulated
C3orf54	-1.37116	5.60542	-8.34493	1.8e-13	1.27e-12	19.8799	Down-Regulated
C3orf57	1.59361	3.11059	4.41789	2.27e-05	5.85e-05	1.59398	Up-Regulated
C3orf67	1.71018	4.56104	6.85775	3.71e-10	1.74e-09	12.3412	Up-Regulated
C3orf70	-1.08018	6.15676	-6.59325	1.37e-09	5.97e-09	11.0593	Down-Regulated
C4BPA	-2.90964	11.4847	-7.01991	1.65e-10	8.06e-10	13.1375	Down-Regulated
C4orf12	-1.09382	4.64872	-8.44928	1.04e-13	7.49e-13	20.4249	Down-Regulated
C4orf19	-1.04033	7.47529	-4.15009	6.4e-05	0.000154676	0.599882	Down-Regulated
C4orf22	-1.63094	2.0788	-5.0144	1.95e-06	5.76e-06	3.96134	Down-Regulated
C4orf31	-2.43139	11.0444	-9.95733	3.23e-17	3.68e-16	28.4308	Down-Regulated
C4orf32	-1.10332	8.59289	-9.37022	7.63e-16	7.32e-15	25.2919	Down-Regulated
C4orf38	-1.4721	3.90756	-10.3151	4.67e-18	5.95e-17	30.3507	Down-Regulated
C4orf48	1.73183	4.69908	7.36987	2.82e-11	1.51e-10	14.8804	Up-Regulated
C4orf7	2.68263	3.29109	5.34132	4.72e-07	1.51e-06	5.34024	Up-Regulated
C5	-1.33957	8.68679	-5.48952	2.44e-07	8.07e-07	5.98265	Down-Regulated
C5AR1	-1.82895	9.82698	-9.12499	2.84e-15	2.5e-14	23.9875	Down-Regulated
C5orf23	-1.92763	8.62074	-9.00351	5.44e-15	4.61e-14	23.3433	Down-Regulated
C5orf34	1.97778	4.60994	11.1421	5.35e-20	8.77e-19	34.7931	Up-Regulated
C5orf38	-2.56149	6.08883	-9.04629	4.33e-15	3.73e-14	23.57	Down-Regulated
C5orf4	-1.69385	9.99847	-9.01247	5.19e-15	4.42e-14	23.3908	Down-Regulated
C5orf46	2.76942	1.65182	9.08374	3.54e-15	3.07e-14	23.7686	Up-Regulated
C5orf49	-2.17817	6.21004	-5.99023	2.45e-08	9.21e-08	8.22591	Down-Regulated
C5orf53	-1.11007	8.21731	-10.0635	1.82e-17	2.14e-16	28.9999	Down-Regulated
C5orf56	-1.09164	6.76177	-10.0563	1.89e-17	2.22e-16	28.9614	Down-Regulated
C6	-3.05991	5.67358	-7.04222	1.48e-10	7.25e-10	13.2476	Down-Regulated
C6orf103	-2.65834	3.17541	-6.44653	2.79e-09	1.18e-08	10.358	Down-Regulated
C6orf105	-2.5136	7.04514	-11.5085	7.42e-21	1.35e-19	36.7579	Down-Regulated
C6orf118	-2.78596	3.75455	-6.44284	2.84e-09	1.19e-08	10.3404	Down-Regulated
C6orf126	1.56226	0.868242	7.06846	1.3e-10	6.4e-10	13.3774	Up-Regulated
C6orf129	1.37491	7.4686	11.6146	4.19e-21	7.92e-20	37.326	Up-Regulated
C6orf141	1.41279	4.38746	5.31998	5.18e-07	1.65e-06	5.2486	Up-Regulated
C6orf145	-1.20864	9.89634	-12.4286	5.34e-23	1.32e-21	41.6669	Down-Regulated
C6orf155	-2.71447	4.12839	-14.71	3.44e-28	1.96e-26	53.5603	Down-Regulated
C6orf165	-1.95832	5.17664	-5.32475	5.08e-07	1.61e-06	5.26905	Down-Regulated
C6orf168	1.08545	6.99076	6.78263	5.39e-10	2.47e-09	11.9749	Up-Regulated
C6orf174	-2.77035	7.74597	-12.3397	8.57e-23	2.06e-21	41.1948	Down-Regulated
C6orf222	2.91158	2.12893	9.86755	5.24e-17	5.84e-16	27.9497	Up-Regulated
C6orf223	-1.25878	7.40769	-4.40591	2.38e-05	6.12e-05	1.54855	Down-Regulated
C6orf25	-1.36108	1.20387	-8.40874	1.28e-13	9.19e-13	20.213	Down-Regulated
C6orf59	-1.21562	3.21878	-7.05917	1.36e-10	6.68e-10	13.3314	Down-Regulated
C6orf97	-1.57099	7.54195	-5.35693	4.4e-07	1.41e-06	5.40743	Down-Regulated
C7	-2.37816	11.2666	-8.47821	8.88e-14	6.47e-13	20.5763	Down-Regulated
C7orf10	2.07947	4.4694	8.6938	2.83e-14	2.2e-13	21.7079	Up-Regulated
C7orf16	-1.34446	1.23441	-6.95269	2.31e-10	1.11e-09	12.8065	Down-Regulated
C7orf23	-1.11054	9.39982	-10.1766	9.88e-18	1.2e-16	29.6068	Down-Regulated
C7orf41	-1.65184	10.1246	-11.566	5.44e-21	1.02e-19	37.066	Down-Regulated
C7orf45	-1.08941	0.782083	-9.26547	1.34e-15	1.23e-14	24.7341	Down-Regulated
C7orf57	-1.09138	4.77418	-2.91143	0.00432226	0.00801228	-3.35546	Down-Regulated
C7orf58	-2.16794	8.57048	-12.1363	2.55e-22	5.69e-21	40.1125	Down-Regulated
C7orf68	1.33512	7.98379	6.78062	5.44e-10	2.49e-09	11.9652	Up-Regulated
C8B	-4.619	5.31288	-12.7167	1.15e-23	3.21e-22	43.1937	Down-Regulated
C8orf12	-1.30006	1.07516	-7.63301	7.34e-12	4.27e-11	16.2107	Down-Regulated
C8orf30A	1.00521	8.82324	11.059	8.39e-20	1.33e-18	34.3466	Up-Regulated
C8orf34	-2.13608	5.38658	-8.25833	2.83e-13	1.94e-12	19.4289	Down-Regulated
C8orf47	1.27544	5.12608	3.54577	0.000567397	0.00119645	-1.46934	Up-Regulated
C8orf51	1.27179	4.67394	7.45293	1.85e-11	1.02e-10	15.2986	Up-Regulated
C8orf73	1.6999	7.95284	8.5608	5.74e-14	4.28e-13	21.009	Up-Regulated
C8orf77	1.07716	2.02636	5.92261	3.37e-08	1.24e-07	7.91675	Up-Regulated
C8orf79	-1.58336	6.14733	-8.80927	1.53e-14	1.23e-13	22.3164	Down-Regulated
C8orf84	-3.26487	6.90656	-16.8403	8.08e-33	1.11e-30	64.1604	Down-Regulated
C8orf85	-2.88704	5.48437	-11.1051	6.54e-20	1.05e-18	34.5944	Down-Regulated
C8ORFK29	1.30682	1.46829	6.76123	5.99e-10	2.73e-09	11.8709	Up-Regulated
C9orf100	2.08011	5.86625	14.7813	2.38e-28	1.41e-26	53.9237	Up-Regulated
C9orf117	-1.95627	4.57898	-5.36035	4.34e-07	1.39e-06	5.42214	Down-Regulated
C9orf125	-1.44714	7.1893	-5.81262	5.61e-08	2.01e-07	7.41791	Down-Regulated
C9orf135	-2.00627	4.04938	-4.38713	2.56e-05	6.56e-05	1.47752	Down-Regulated
C9orf140	3.39977	6.53101	17.7259	1.13e-34	2.28e-32	68.4019	Up-Regulated
C9orf171	-2.94982	4.21404	-6.44151	2.86e-09	1.2e-08	10.3341	Down-Regulated
C9orf24	-3.14122	5.7978	-6.49569	2.2e-09	9.37e-09	10.5922	Down-Regulated
C9orf45	-1.10648	6.49593	-5.24851	7.1e-07	2.21e-06	4.9433	Down-Regulated
C9orf68	-1.28609	6.29086	-7.06231	1.34e-10	6.59e-10	13.3469	Down-Regulated
C9orf84	1.9038	2.70532	6.21286	8.57e-09	3.41e-08	9.25647	Up-Regulated
CA1	-2.19501	1.72099	-8.74767	2.13e-14	1.67e-13	21.9916	Down-Regulated
CA10	1.39131	1.73714	3.34932	0.00109615	0.00222174	-2.08628	Up-Regulated
CA2	-2.35808	9.27435	-10.7862	3.66e-19	5.32e-18	32.8814	Down-Regulated
CA3	-2.70367	6.19198	-9.46585	4.56e-16	4.5e-15	25.8018	Down-Regulated
CA4	-6.16222	6.34579	-18.4687	3.41e-36	9.73e-34	71.8816	Down-Regulated
CA8	-1.00747	5.89088	-3.29871	0.00129329	0.00259796	-2.24052	Down-Regulated
CA9	5.42962	4.29468	11.0013	1.15e-19	1.79e-18	34.037	Up-Regulated
CAB39L	-1.47912	8.59598	-11.8581	1.13e-21	2.33e-20	38.6279	Down-Regulated
CABLES1	-1.42237	9.7156	-9.58001	2.47e-16	2.51e-15	26.4113	Down-Regulated
CABLES2	1.10461	7.6793	10.2811	5.62e-18	7.06e-17	30.1682	Up-Regulated
CABYR	3.37617	4.91218	11.8759	1.03e-21	2.13e-20	38.7231	Up-Regulated
CACHD1	-1.79021	8.91928	-9.1216	2.89e-15	2.54e-14	23.9695	Down-Regulated
CACNA1B	1.24567	1.79306	3.22325	0.00164964	0.00326211	-2.46693	Up-Regulated
CACNA1D	-1.60818	7.3897	-6.5907	1.38e-09	6.04e-09	11.0471	Down-Regulated
CACNA1E	1.93211	2.10691	7.76139	3.78e-12	2.28e-11	16.8653	Up-Regulated
CACNA1S	-2.85365	1.91818	-13.4869	1.96e-25	7.1e-24	47.2433	Down-Regulated
CACNA2D2	-4.09654	10.5088	-10.9543	1.48e-19	2.26e-18	33.7846	Down-Regulated
CACNB4	-2.37763	6.36724	-12.0118	4.96e-22	1.07e-20	39.4485	Down-Regulated
CACNG1	-1.01828	1.19091	-5.99585	2.39e-08	8.99e-08	8.2517	Down-Regulated
CACNG4	-2.01327	8.11855	-6.12301	1.31e-08	5.11e-08	8.83826	Down-Regulated
CACNG6	-2.38165	3.97443	-6.00801	2.26e-08	8.52e-08	8.30749	Down-Regulated
CAD	1.04644	9.77493	9.47961	4.24e-16	4.19e-15	25.8752	Up-Regulated
CADM1	-1.75411	11.4638	-10.5027	1.7e-18	2.28e-17	31.3582	Down-Regulated
CADM3	-1.17303	6.49378	-4.5372	1.41e-05	3.74e-05	2.05107	Down-Regulated
CALB2	-1.03529	4.89746	-2.76738	0.00658769	0.0118221	-3.73967	Down-Regulated
CALCOCO1	-1.46713	11.0254	-17.9649	3.64e-35	8.5e-33	69.5292	Down-Regulated
CALCRL	-2.55423	10.5994	-16.8325	8.4e-33	1.14e-30	64.1227	Down-Regulated
CALML3	1.01711	1.46816	2.69102	0.00818596	0.0144678	-3.93641	Up-Regulated
CALN1	-1.04665	1.27662	-4.5381	1.4e-05	3.73e-05	2.05457	Down-Regulated
CALU	1.17312	12.0847	10.9472	1.53e-19	2.34e-18	33.7465	Up-Regulated
CAMK2A	-1.95305	3.89291	-11.4633	9.46e-21	1.7e-19	36.5159	Down-Regulated
CAMK2N1	-1.27812	10.0081	-7.25153	5.15e-11	2.67e-10	14.2875	Down-Regulated
CAMK2N2	2.25471	2.88236	9.84419	5.95e-17	6.54e-16	27.8246	Up-Regulated
CAMP	-3.28923	4.0389	-12.9421	3.48e-24	1.03e-22	44.3837	Down-Regulated
CANT1	1.00966	10.8749	12.531	3.09e-23	7.98e-22	42.2104	Up-Regulated
CAPN11	-1.10362	2.32817	-6.16455	1.08e-08	4.24e-08	9.03124	Down-Regulated
CAPN12	1.02769	7.52449	5.8508	4.7e-08	1.7e-07	7.59047	Up-Regulated
CAPN14	1.05926	2.42785	4.57816	1.2e-05	3.2e-05	2.20997	Up-Regulated
CAPN3	-2.20667	7.24427	-10.7491	4.47e-19	6.44e-18	32.6825	Down-Regulated
CAPN5	1.0952	8.77262	5.72063	8.56e-08	3e-07	7.00458	Up-Regulated
CAPN9	-2.51547	6.63631	-7.8557	2.32e-12	1.43e-11	17.3483	Down-Regulated
CAPS	-1.5525	9.59984	-4.22348	4.84e-05	0.000119036	0.867814	Down-Regulated
CAPS2	-1.03661	5.40361	-5.14222	1.13e-06	3.43e-06	4.49401	Down-Regulated
CAPSL	-2.93257	4.66368	-6.08761	1.55e-08	5.98e-08	8.67432	Down-Regulated
CARD11	1.67406	8.07336	7.93084	1.57e-12	9.85e-12	17.7343	Up-Regulated
CARD14	2.50021	5.06379	11.0597	8.35e-20	1.33e-18	34.3506	Up-Regulated
CARD16	-1.51161	8.31555	-9.58721	2.38e-16	2.42e-15	26.4498	Down-Regulated
CARD9	-1.26212	6.35428	-6.84614	3.93e-10	1.83e-09	12.2844	Down-Regulated
CASC1	-1.91061	4.71037	-5.91013	3.57e-08	1.31e-07	7.85991	Down-Regulated
CASC5	2.72665	5.41638	12.896	4.44e-24	1.29e-22	44.1405	Up-Regulated
CASKIN1	2.09	2.01954	8.4628	9.64e-14	7e-13	20.4956	Up-Regulated
CASKIN2	-1.64356	10.1522	-14.1062	7.74e-27	3.43e-25	50.461	Down-Regulated
CASP1	-1.05935	9.34997	-7.85469	2.33e-12	1.44e-11	17.3431	Down-Regulated
CASP12	-2.49391	2.60639	-13.1407	1.22e-24	3.79e-23	45.4289	Down-Regulated
CASP5	-1.56615	3.3502	-7.17154	7.72e-11	3.92e-10	13.8887	Down-Regulated
CASQ2	-3.17684	4.96556	-10.7142	5.4e-19	7.72e-18	32.4947	Down-Regulated
CASS4	-1.68829	7.61892	-9.25945	1.38e-15	1.27e-14	24.7021	Down-Regulated
CASZ1	-1.22922	9.37609	-8.14212	5.21e-13	3.46e-12	18.8255	Down-Regulated
CAT	-2.03501	11.7684	-18.5245	2.63e-36	7.83e-34	72.14	Down-Regulated
CATSPERB	1.50872	2.98369	5.68733	9.97e-08	3.46e-07	6.85585	Up-Regulated
CAV1	-3.77881	12.9887	-21.8915	8.16e-43	9.85e-40	87.0024	Down-Regulated
CAV2	-2.51182	11.8818	-17.8954	5.06e-35	1.13e-32	69.2023	Down-Regulated
CAV3	-2.95671	2.28559	-15.1689	3.31e-29	2.24e-27	55.8894	Down-Regulated
CBFA2T3	-1.40429	7.3707	-8.12818	5.6e-13	3.71e-12	18.7532	Down-Regulated
CBLC	3.02322	6.46381	13.3575	3.88e-25	1.33e-23	46.5663	Up-Regulated
CBX2	2.02632	6.8254	8.95156	7.18e-15	5.98e-14	23.0683	Up-Regulated
CBX3	1.02183	11.457	11.9773	5.97e-22	1.27e-20	39.2643	Up-Regulated
CBX7	-1.82892	10.0881	-15.6295	3.23e-30	2.68e-28	58.2023	Down-Regulated
CBX8	1.17597	6.80578	11.342	1.82e-20	3.16e-19	35.8657	Up-Regulated
CCBE1	-2.67027	6.79605	-10.5224	1.52e-18	2.06e-17	31.4644	Down-Regulated
CCDC108	-2.64646	5.40241	-6.01613	2.17e-08	8.22e-08	8.3448	Down-Regulated
CCDC11	-1.5352	5.34248	-4.2925	3.71e-05	9.27e-05	1.12289	Down-Regulated
CCDC114	-1.64988	5.86547	-4.66032	8.56e-06	2.33e-05	2.53161	Down-Regulated
CCDC129	2.27505	2.41441	6.02767	2.06e-08	7.81e-08	8.39787	Up-Regulated
CCDC13	-1.59729	4.33476	-6.54428	1.74e-09	7.49e-09	10.8245	Down-Regulated
CCDC135	-2.25836	4.05691	-5.34309	4.68e-07	1.5e-06	5.34784	Down-Regulated
CCDC138	1.07061	5.32345	6.07972	1.61e-08	6.2e-08	8.63789	Up-Regulated
CCDC141	-3.72934	5.78613	-15.8043	1.35e-30	1.21e-28	59.0735	Down-Regulated
CCDC146	-1.29616	7.23732	-5.39081	3.79e-07	1.23e-06	5.55358	Down-Regulated
CCDC147	-2.27322	4.34354	-7.11098	1.05e-10	5.23e-10	13.5879	Down-Regulated
CCDC150	2.05782	2.93676	10.4259	2.57e-18	3.37e-17	30.9458	Up-Regulated
CCDC151	-1.61564	4.66116	-4.46034	1.92e-05	4.99e-05	1.75561	Down-Regulated
CCDC152	-1.58579	6.45981	-12.5419	2.92e-23	7.56e-22	42.2679	Down-Regulated
CCDC153	-1.27154	4.90163	-5.02058	1.9e-06	5.62e-06	3.9869	Down-Regulated
CCDC17	-2.61585	5.52118	-6.64215	1.08e-09	4.76e-09	11.2946	Down-Regulated
CCDC19	-1.40575	6.43252	-4.34362	3.04e-05	7.69e-05	1.31377	Down-Regulated
CCDC21	1.01732	8.25076	9.54774	2.94e-16	2.96e-15	26.2389	Up-Regulated
CCDC33	-2.28308	3.74396	-5.33777	4.79e-07	1.53e-06	5.32498	Down-Regulated
CCDC34	1.45338	7.15398	10.2701	5.96e-18	7.46e-17	30.1091	Up-Regulated
CCDC37	-2.69183	3.23022	-6.2352	7.71e-09	3.09e-08	9.36092	Down-Regulated
CCDC39	-1.68637	5.18408	-5.93749	3.14e-08	1.16e-07	7.98464	Down-Regulated
CCDC42B	-2.35132	4.83105	-5.71933	8.61e-08	3.02e-07	6.99878	Down-Regulated
CCDC48	-3.21106	7.11103	-17.8341	6.77e-35	1.45e-32	68.9133	Down-Regulated
CCDC54	-1.30995	1.0768	-11.1275	5.79e-20	9.43e-19	34.7144	Down-Regulated
CCDC60	-2.64267	3.44047	-6.45414	2.69e-09	1.14e-08	10.3942	Down-Regulated
CCDC64	1.59856	7.21445	8.70448	2.68e-14	2.08e-13	21.7641	Up-Regulated
CCDC65	-2.38634	4.96244	-6.81255	4.65e-10	2.14e-09	12.1206	Down-Regulated
CCDC68	-1.58189	8.13226	-8.55218	6.01e-14	4.47e-13	20.9638	Down-Regulated
CCDC69	-1.48268	10.6423	-10.9153	1.82e-19	2.75e-18	33.5749	Down-Regulated
CCDC74B	-1.35102	4.74671	-3.96146	0.000129619	0.000299858	-0.0727282	Down-Regulated
CCDC78	-1.80054	5.85755	-4.43354	2.13e-05	5.52e-05	1.65345	Down-Regulated
CCDC81	-2.20028	4.27942	-6.73953	6.66e-10	3.02e-09	11.7656	Down-Regulated
CCDC85A	-3.32732	7.20959	-18.1017	1.91e-35	4.78e-33	70.1711	Down-Regulated
CCDC89	-1.38307	4.59192	-6.00643	2.28e-08	8.57e-08	8.30026	Down-Regulated
CCDC96	-1.10217	6.39241	-5.43494	3.11e-07	1.02e-06	5.74484	Down-Regulated
CCDC99	1.31843	7.19503	13.2653	6.3e-25	2.07e-23	46.0829	Up-Regulated
CCIN	-1.74547	3.13132	-9.8615	5.42e-17	6.02e-16	27.9173	Down-Regulated
CCK	-1.49988	2.28419	-5.54759	1.88e-07	6.31e-07	6.23713	Down-Regulated
CCL14	-2.54246	8.56754	-8.95644	7e-15	5.84e-14	23.0941	Down-Regulated
CCL14-CCL15	-1.85256	2.28434	-4.84992	3.91e-06	1.11e-05	3.28858	Down-Regulated
CCL15	-1.43149	3.34803	-4.08161	8.29e-05	0.000197037	0.35299	Down-Regulated
CCL19	1.468	7.33535	4.11313	7.36e-05	0.00017621	0.466237	Up-Regulated
CCL20	1.19677	7.44301	3.13205	0.00220207	0.00427463	-2.73472	Up-Regulated
CCL23	-2.83763	5.3448	-10.9732	1.33e-19	2.06e-18	33.8861	Down-Regulated
CCL24	-1.8441	2.94814	-5.62389	1.33e-07	4.55e-07	6.57388	Down-Regulated
CCL25	1.11408	0.857404	6.29026	5.92e-09	2.4e-08	9.61917	Up-Regulated
CCL26	1.26417	2.19773	4.82169	4.4e-06	1.24e-05	3.17462	Up-Regulated
CCL7	2.13487	2.76994	6.26521	6.68e-09	2.69e-08	9.50157	Up-Regulated
CCNA1	-1.47976	4.10235	-3.84263	0.00019991	0.000449032	-0.484222	Down-Regulated
CCNA2	2.81857	7.07556	14.4438	1.35e-27	6.76e-26	52.1986	Up-Regulated
CCNB1	2.8116	8.08123	16.4138	6.53e-32	7.49e-30	62.0825	Up-Regulated
CCNB2	3.19477	6.64327	15.1809	3.11e-29	2.12e-27	55.9497	Up-Regulated
CCND2	-1.39464	10.2338	-10.0392	2.08e-17	2.43e-16	28.87	Down-Regulated
CCNE1	3.05964	5.39836	14.5391	8.26e-28	4.26e-26	52.6871	Up-Regulated
CCNE2	2.0651	6.14604	11.55	5.93e-21	1.1e-19	36.9803	Up-Regulated
CCNF	1.79443	7.37429	13.0139	2.38e-24	7.25e-23	44.7618	Up-Regulated
CCNI2	1.20573	3.82882	6.47195	2.47e-09	1.05e-08	10.479	Up-Regulated
CCNO	1.99982	5.36247	5.96857	2.72e-08	1.01e-07	8.12669	Up-Regulated
CCR8	1.69335	3.00956	7.47633	1.64e-11	9.12e-11	15.4167	Up-Regulated
CCRL1	-3.09917	6.49333	-15.7406	1.85e-30	1.59e-28	58.7567	Down-Regulated
CCRL2	-1.70084	7.96365	-10.1631	1.06e-17	1.29e-16	29.5346	Down-Regulated
CCT3	1.34306	12.072	15.4547	7.79e-30	5.84e-28	57.3276	Up-Regulated
CCT5	1.20448	11.8655	13.3032	5.16e-25	1.73e-23	46.282	Up-Regulated
CCT6A	1.09318	11.6431	9.30923	1.06e-15	9.93e-15	24.967	Up-Regulated
CD101	-2.70612	7.46132	-14.0058	1.3e-26	5.53e-25	49.9419	Down-Regulated
CD160	-1.52649	4.01695	-9.98949	2.72e-17	3.12e-16	28.6032	Down-Regulated
CD163	-1.19042	11.3696	-4.64023	9.29e-06	2.52e-05	2.45259	Down-Regulated
CD19	2.21385	4.08118	5.56262	1.76e-07	5.91e-07	6.30328	Up-Regulated
CD1A	1.01301	5.39106	2.55527	0.0119163	0.0204345	-4.27416	Up-Regulated
CD1C	-1.23545	6.55713	-4.40772	2.36e-05	6.08e-05	1.5554	Down-Regulated
CD1E	-1.00709	5.5999	-3.27772	0.00138444	0.00276888	-2.30395	Down-Regulated
CD22	-1.01425	7.32501	-3.89628	0.000164571	0.000374822	-0.299627	Down-Regulated
CD24	1.3038	12.0137	6.49146	2.24e-09	9.56e-09	10.572	Up-Regulated
CD244	-1.61643	5.62853	-8.22434	3.38e-13	2.3e-12	19.2521	Down-Regulated
CD27	1.21322	7.21554	4.97523	2.31e-06	6.75e-06	3.7998	Up-Regulated
CD300C	-2.07869	6.99075	-10.7895	3.6e-19	5.23e-18	32.8991	Down-Regulated
CD300LF	-2.11054	8.10759	-10.9546	1.47e-19	2.26e-18	33.7864	Down-Regulated
CD300LG	-5.7036	5.23811	-18.1719	1.37e-35	3.52e-33	70.4996	Down-Regulated
CD302	-1.64899	11.0488	-11.1237	5.91e-20	9.61e-19	34.6944	Down-Regulated
CD33	-1.58225	7.41297	-7.82009	2.79e-12	1.7e-11	17.1657	Down-Regulated
CD34	-1.39077	10.6765	-11.2285	3.36e-20	5.61e-19	35.2565	Down-Regulated
CD36	-3.4255	10.1926	-16.2391	1.55e-31	1.65e-29	61.2245	Down-Regulated
CD37	-1.26029	9.85442	-6.87704	3.37e-10	1.58e-09	12.4355	Down-Regulated
CD52	-2.52951	10.5419	-12.9578	3.2e-24	9.51e-23	44.4666	Down-Regulated
CD53	-1.07139	10.8765	-5.84174	4.9e-08	1.77e-07	7.54948	Down-Regulated
CD5L	-4.04072	3.34595	-17.8268	7.01e-35	1.48e-32	68.8787	Down-Regulated
CD68	-1.37998	13.0048	-8.11663	5.95e-13	3.94e-12	18.6934	Down-Regulated
CD69	-1.18141	8.23744	-5.59011	1.55e-07	5.26e-07	6.42447	Down-Regulated
CD70	1.00955	3.46124	3.77658	0.000253379	0.000560668	-0.708785	Up-Regulated
CD74	-1.00413	16.49	-5.70673	9.12e-08	3.19e-07	6.94245	Down-Regulated
CD79A	1.97186	7.72826	5.83852	4.97e-08	1.79e-07	7.53492	Up-Regulated
CD83	-1.71781	9.7499	-9.94324	3.49e-17	3.96e-16	28.3553	Down-Regulated
CD93	-1.90252	11.9797	-12.8461	5.79e-24	1.67e-22	43.8773	Down-Regulated
CD97	-1.34557	11.8494	-10.8167	3.1e-19	4.54e-18	33.0455	Down-Regulated
CDA	1.55433	6.44029	4.11514	7.31e-05	0.000174957	0.473497	Up-Regulated
CDC14A	-1.25792	7.73738	-8.74362	2.17e-14	1.71e-13	21.9702	Down-Regulated
CDC20	3.85883	7.05441	16.8449	7.9e-33	1.1e-30	64.183	Up-Regulated
CDC25A	2.26451	5.18576	11.2411	3.14e-20	5.28e-19	35.324	Up-Regulated
CDC25C	3.88177	4.06923	16.8977	6.11e-33	8.9e-31	64.4384	Up-Regulated
CDC42EP2	-1.04728	8.41861	-7.23761	5.53e-11	2.85e-10	14.218	Down-Regulated
CDC45	3.66704	5.14641	15.0735	5.37e-29	3.49e-27	55.4069	Up-Regulated
CDC6	3.27876	6.65926	16.4562	5.3e-32	6.22e-30	62.2901	Up-Regulated
CDC7	1.17989	6.8248	7.35548	3.04e-11	1.62e-10	14.8081	Up-Regulated
CDCA2	2.94753	5.03472	13.6143	1.01e-25	3.81e-24	47.9082	Up-Regulated
CDCA3	3.05476	5.47472	15.6366	3.12e-30	2.59e-28	58.2379	Up-Regulated
CDCA4	1.3252	7.94654	10.8366	2.79e-19	4.12e-18	33.1522	Up-Regulated
CDCA5	2.81922	7.10127	14.4553	1.27e-27	6.4e-26	52.2576	Up-Regulated
CDCA7	2.58614	6.78811	10.4282	2.54e-18	3.33e-17	30.9584	Up-Regulated
CDCA8	3.06798	6.88266	16.1163	2.85e-31	2.89e-29	60.6193	Up-Regulated
CDCP1	1.04654	10.2097	6.62401	1.18e-09	5.18e-09	11.2073	Up-Regulated
CDH1	1.07614	12.7032	9.58302	2.43e-16	2.47e-15	26.4274	Up-Regulated
CDH13	-1.76564	8.37222	-8.63351	3.9e-14	2.98e-13	21.3908	Down-Regulated
CDH16	-1.89648	1.77689	-9.10121	3.23e-15	2.81e-14	23.8613	Down-Regulated
CDH17	1.80115	3.0634	5.14759	1.1e-06	3.35e-06	4.51657	Up-Regulated
CDH19	-3.08301	3.22964	-13.4048	3.02e-25	1.05e-23	46.8141	Down-Regulated
CDH2	1.24496	5.36963	3.82658	0.000211811	0.000473742	-0.539047	Up-Regulated
CDH23	-1.84937	6.6512	-8.73005	2.34e-14	1.83e-13	21.8988	Down-Regulated
CDH24	1.26681	6.92567	6.98935	1.93e-10	9.32e-10	12.9868	Up-Regulated
CDH26	-1.35731	6.19625	-5.3498	4.54e-07	1.46e-06	5.37672	Down-Regulated
CDH3	2.82576	9.52179	10.4959	1.76e-18	2.36e-17	31.3218	Up-Regulated
CDH5	-2.37942	11.1121	-17.7316	1.1e-34	2.24e-32	68.429	Down-Regulated
CDHR3	-3.33545	7.13318	-7.75503	3.91e-12	2.35e-11	16.8328	Down-Regulated
CDHR4	-2.91067	4.45074	-5.88302	4.05e-08	1.48e-07	7.73661	Down-Regulated
CDK1	2.19956	7.99148	11.9894	5.59e-22	1.2e-20	39.3293	Up-Regulated
CDK5R1	1.72419	6.29308	9.50344	3.73e-16	3.71e-15	26.0024	Up-Regulated
CDK5R2	2.35099	1.90554	7.68789	5.53e-12	3.27e-11	16.4901	Up-Regulated
CDKL1	-1.70822	5.41183	-9.19208	1.98e-15	1.78e-14	24.3439	Down-Regulated
CDKL2	-1.45858	8.01521	-6.94469	2.41e-10	1.15e-09	12.7671	Down-Regulated
CDKL5	-1.23358	5.88283	-6.90224	2.98e-10	1.41e-09	12.5589	Down-Regulated
CDKN1C	-1.13184	8.70629	-8.09522	6.66e-13	4.38e-12	18.5826	Down-Regulated
CDKN2A	2.35515	6.2691	7.54922	1.13e-11	6.41e-11	15.7854	Up-Regulated
CDKN2B	-1.44	9.56984	-7.95707	1.37e-12	8.65e-12	17.8693	Down-Regulated
CDKN3	2.96544	5.35841	12.5725	2.48e-23	6.5e-22	42.4301	Up-Regulated
CDO1	-2.9583	6.31295	-15.1235	4.17e-29	2.79e-27	55.6596	Down-Regulated
CDON	-1.49199	8.08313	-8.0296	9.38e-13	6.07e-12	18.2434	Down-Regulated
CDT1	2.68015	6.59714	13.7048	6.27e-26	2.44e-24	48.3796	Up-Regulated
CDX1	1.34815	2.06637	6.74934	6.35e-10	2.88e-09	11.8131	Up-Regulated
CDX2	1.89595	1.20731	6.12867	1.28e-08	4.98e-08	8.8645	Up-Regulated
CEACAM1	1.65601	8.95559	9.342	8.88e-16	8.42e-15	25.1416	Up-Regulated
CEACAM21	-1.78141	6.02326	-7.3759	2.74e-11	1.47e-10	14.9107	Down-Regulated
CEACAM3	-1.2253	3.53013	-6.20557	8.88e-09	3.53e-08	9.22246	Down-Regulated
CEACAM4	-1.25819	4.59424	-5.03996	1.75e-06	5.19e-06	4.06719	Down-Regulated
CEACAM5	2.96496	9.82617	5.61801	1.37e-07	4.67e-07	6.54784	Up-Regulated
CEACAM7	2.00397	2.93307	5.62073	1.35e-07	4.62e-07	6.55988	Up-Regulated
CEACAM8	-2.32595	2.75731	-5.83763	5e-08	1.8e-07	7.53086	Down-Regulated
CEBPA	-1.49781	9.80711	-7.76025	3.8e-12	2.29e-11	16.8594	Down-Regulated
CEBPD	-1.01692	11.1168	-6.15505	1.13e-08	4.43e-08	8.98705	Down-Regulated
CECR1	-1.04091	11.3321	-5.9052	3.65e-08	1.34e-07	7.83745	Down-Regulated
CECR2	-1.32568	6.20831	-4.80307	4.75e-06	1.34e-05	3.09967	Down-Regulated
CECR7	1.65953	2.98912	5.39776	3.67e-07	1.19e-06	5.58367	Up-Regulated
CELA2B	-2.00439	1.15941	-9.89231	4.59e-17	5.15e-16	28.0823	Down-Regulated
CELF2	-1.3193	11.0224	-10.9308	1.68e-19	2.55e-18	33.6583	Down-Regulated
CELF5	2.21643	2.5081	8.67918	3.06e-14	2.37e-13	21.6309	Up-Regulated
CELSR3	2.74291	6.14321	11.4237	1.17e-20	2.08e-19	36.3032	Up-Regulated
CENPA	3.37296	4.78919	14.8223	1.93e-28	1.18e-26	54.1324	Up-Regulated
CENPE	2.62662	6.23816	13.1926	9.25e-25	2.96e-23	45.7018	Up-Regulated
CENPF	3.2801	8.12423	15.3125	1.6e-29	1.13e-27	56.6131	Up-Regulated
CENPH	1.42258	6.58572	10.3627	3.61e-18	4.67e-17	30.6064	Up-Regulated
CENPI	2.94971	3.91301	12.4637	4.42e-23	1.12e-21	41.8532	Up-Regulated
CENPK	2.13511	5.38667	11.2839	2.49e-20	4.26e-19	35.5538	Up-Regulated
CENPL	1.43506	6.7992	13.0105	2.42e-24	7.37e-23	44.7444	Up-Regulated
CENPM	1.86921	6.05863	9.11173	3.05e-15	2.67e-14	23.9171	Up-Regulated
CENPO	1.04895	6.4938	8.94306	7.52e-15	6.25e-14	23.0233	Up-Regulated
CENPW	1.32143	6.26105	7.63741	7.17e-12	4.18e-11	16.2331	Up-Regulated
CEP55	3.18972	6.90805	14.847	1.7e-28	1.05e-26	54.2579	Up-Regulated
CEP72	1.23351	6.1025	9.60168	2.2e-16	2.25e-15	26.5271	Up-Regulated
CERCAM	1.46387	9.38163	8.48407	8.61e-14	6.29e-13	20.607	Up-Regulated
CES1	-2.79244	11.2966	-12.1333	2.59e-22	5.77e-21	40.0963	Down-Regulated
CES4	-2.70917	5.50751	-9.46801	4.51e-16	4.45e-15	25.8133	Down-Regulated
CETP	-1.53537	5.07277	-6.97757	2.04e-10	9.86e-10	12.9288	Down-Regulated
CFB	1.40919	10.9591	6.22931	7.93e-09	3.17e-08	9.33339	Up-Regulated
CFC1B	-1.01845	0.749148	-5.90919	3.58e-08	1.32e-07	7.85562	Down-Regulated
CFD	-2.74987	9.74248	-12.4613	4.48e-23	1.13e-21	41.8406	Down-Regulated
CFHR3	1.099	2.44004	5.43552	3.11e-07	1.01e-06	5.74737	Up-Regulated
CFL2	-1.37484	9.79383	-11.7697	1.82e-21	3.62e-20	38.1559	Down-Regulated
CFP	-2.36798	6.98137	-13.4509	2.37e-25	8.46e-24	47.0551	Down-Regulated
CFTR	-2.53875	8.44253	-7.21128	6.31e-11	3.24e-10	14.0866	Down-Regulated
CGB	1.03282	0.826002	5.33667	4.82e-07	1.54e-06	5.32025	Up-Regulated
CGNL1	-2.58511	10.4443	-16.9957	3.79e-33	5.73e-31	64.9121	Down-Regulated
CGREF1	3.3071	4.47254	11.4721	9.03e-21	1.63e-19	36.5628	Up-Regulated
CHAC1	1.01116	5.9283	5.9112	3.55e-08	1.3e-07	7.86478	Up-Regulated
CHAF1B	1.9872	6.67051	14.5582	7.49e-28	3.91e-26	52.7846	Up-Regulated
CHD5	-1.26063	1.95516	-5.46998	2.66e-07	8.77e-07	5.89732	Down-Regulated
CHEK1	2.01069	6.65044	12.7744	8.46e-24	2.4e-22	43.4987	Up-Regulated
CHEK2	1.15207	7.08441	9.10283	3.2e-15	2.79e-14	23.8699	Up-Regulated
CHGB	1.56325	3.99593	3.23461	0.00159069	0.00315221	-2.43312	Up-Regulated
CHI3L2	-2.36261	8.6595	-8.03807	8.98e-13	5.82e-12	18.2871	Down-Regulated
CHIA	-3.00619	6.32183	-7.31229	3.78e-11	1.99e-10	14.5915	Down-Regulated
CHML	1.10271	9.08567	6.58751	1.41e-09	6.13e-09	11.0317	Up-Regulated
CHP2	-1.0194	2.00815	-2.50262	0.0137335	0.0232536	-4.40097	Down-Regulated
CHPF	1.24881	11.0378	11.3577	1.67e-20	2.93e-19	35.9496	Up-Regulated
CHPF2	1.06589	10.5975	12.4763	4.14e-23	1.05e-21	41.9198	Up-Regulated
CHPT1	-1.08229	9.74596	-8.42978	1.15e-13	8.27e-13	20.3229	Down-Regulated
CHRDL1	-2.89807	9.38342	-10.3616	3.64e-18	4.69e-17	30.6004	Down-Regulated
CHRDL2	1.47921	4.30915	5.50485	2.28e-07	7.57e-07	6.04965	Up-Regulated
CHRM1	-4.62947	3.94392	-16.8008	9.8e-33	1.31e-30	63.9692	Down-Regulated
CHRM2	-2.73616	2.04888	-11.5295	6.63e-21	1.22e-19	36.8706	Down-Regulated
CHRM3	-1.52086	4.24378	-5.34945	4.55e-07	1.46e-06	5.3752	Down-Regulated
CHRM4	-1.57905	2.52004	-7.46361	1.75e-11	9.69e-11	15.3525	Down-Regulated
CHRNA10	-1.21664	3.56033	-7.74707	4.07e-12	2.44e-11	16.7921	Down-Regulated
CHRNA2	-3.32314	2.34532	-20.1154	1.86e-39	1e-36	79.3423	Down-Regulated
CHRNA4	-1.45636	1.45236	-6.62012	1.2e-09	5.27e-09	11.1885	Down-Regulated
CHRNA5	2.60348	4.87237	11.7766	1.75e-21	3.51e-20	38.1924	Up-Regulated
CHRNA6	1.17566	1.37184	6.68995	8.51e-10	3.81e-09	11.5254	Up-Regulated
CHRNA9	1.14864	1.58905	3.35513	0.00107539	0.00218116	-2.06842	Up-Regulated
CHRNB1	1.08414	7.43039	9.53823	3.09e-16	3.11e-15	26.1881	Up-Regulated
CHRNB4	2.06362	1.7228	9.31972	1e-15	9.44e-15	25.0228	Up-Regulated
CHST15	1.04767	10.1688	9.74913	9.93e-17	1.06e-15	27.3156	Up-Regulated
CHST4	1.06597	3.48459	3.56413	0.000532834	0.00112914	-1.41024	Up-Regulated
CHST6	1.31767	6.54742	3.84252	0.000199992	0.000449167	-0.48461	Up-Regulated
CHST9	-2.69067	5.71538	-5.04413	1.72e-06	5.11e-06	4.08447	Down-Regulated
CHTF18	1.28884	6.97741	9.15554	2.41e-15	2.14e-14	24.1497	Up-Regulated
CIB2	1.04621	6.07838	5.9721	2.67e-08	9.99e-08	8.14283	Up-Regulated
CILP	2.18096	6.80551	6.57338	1.51e-09	6.55e-09	10.9639	Up-Regulated
CILP2	3.7559	5.64321	12.1513	2.35e-22	5.29e-21	40.1921	Up-Regulated
CITED1	-1.14287	2.96917	-4.50955	1.57e-05	4.15e-05	1.94438	Down-Regulated
CITED2	-1.19296	11.6323	-9.22719	1.64e-15	1.49e-14	24.5305	Down-Regulated
CKAP2	1.07919	8.53212	8.71448	2.54e-14	1.98e-13	21.8167	Up-Regulated
CKAP2L	3.17065	5.51752	14.9714	9.03e-29	5.69e-27	54.8899	Up-Regulated
CKAP4	1.03331	11.0498	10.4891	1.83e-18	2.44e-17	31.2852	Up-Regulated
CKM	1.75866	2.27893	5.95087	2.95e-08	1.1e-07	8.04574	Up-Regulated
CKMT1A	1.93537	4.77681	5.4751	2.6e-07	8.59e-07	5.91967	Up-Regulated
CKMT1B	1.84164	6.33509	5.41683	3.38e-07	1.1e-06	5.66626	Up-Regulated
CKS1B	1.53428	8.78315	11.0725	7.79e-20	1.24e-18	34.4194	Up-Regulated
CLCN2	1.23647	5.91783	9.78357	8.25e-17	8.9e-16	27.5	Up-Regulated
CLDN10	2.63241	5.54383	5.74705	7.58e-08	2.67e-07	7.12293	Up-Regulated
CLDN11	-1.98741	6.90274	-9.67611	1.47e-16	1.55e-15	26.9249	Down-Regulated
CLDN12	1.13857	10.0145	11.8664	1.08e-21	2.24e-20	38.6727	Up-Regulated
CLDN14	1.69051	2.12009	8.6652	3.3e-14	2.54e-13	21.5574	Up-Regulated
CLDN18	-6.70303	11.0966	-13.7131	6e-26	2.35e-24	48.423	Down-Regulated
CLDN3	1.32307	9.5024	5.44518	2.97e-07	9.74e-07	5.78934	Up-Regulated
CLDN4	1.10269	12.5563	8.42802	1.16e-13	8.35e-13	20.3138	Up-Regulated
CLDN5	-2.87872	10.0229	-15.967	5.98e-31	5.84e-29	59.8811	Down-Regulated
CLDN6	1.94073	3.03729	4.12945	6.92e-05	0.000166441	0.525154	Up-Regulated
CLDN8	-1.40753	4.21961	-3.25882	0.00147157	0.0029283	-2.36075	Down-Regulated
CLDND2	-1.00172	1.74484	-6.85511	3.76e-10	1.76e-09	12.3283	Down-Regulated
CLEC10A	-1.13841	7.48166	-4.88919	3.32e-06	9.52e-06	3.44788	Down-Regulated
CLEC12A	-2.35217	6.91531	-9.34359	8.8e-16	8.36e-15	25.15	Down-Regulated
CLEC12B	-1.27596	2.16268	-5.66981	1.08e-07	3.74e-07	6.7778	Down-Regulated
CLEC14A	-2.21303	10.028	-16.1667	2.22e-31	2.31e-29	60.868	Down-Regulated
CLEC17A	1.15472	2.42471	4.25218	4.33e-05	0.000107563	0.97353	Up-Regulated
CLEC1A	-2.23198	6.85817	-14.5282	8.74e-28	4.5e-26	52.6309	Down-Regulated
CLEC3B	-4.28326	9.66966	-20.5165	3.13e-40	2.33e-37	81.1069	Down-Regulated
CLEC4D	-1.01297	3.42038	-3.9021	0.000161117	0.000367403	-0.279482	Down-Regulated
CLEC4E	-1.85199	6.63852	-7.09751	1.12e-10	5.57e-10	13.5212	Down-Regulated
CLEC4F	-1.51673	3.35008	-6.45629	2.66e-09	1.13e-08	10.4044	Down-Regulated
CLEC4M	-3.34587	2.76951	-10.2633	6.18e-18	7.72e-17	30.0727	Down-Regulated
CLEC6A	-1.55356	3.05446	-5.48175	2.53e-07	8.34e-07	5.94869	Down-Regulated
CLEC9A	-1.28276	3.01387	-5.1771	9.69e-07	2.97e-06	4.64081	Down-Regulated
CLIC2	-1.20461	9.83017	-6.99497	1.87e-10	9.08e-10	13.0145	Down-Regulated
CLIC3	-2.79422	8.85865	-12.2213	1.61e-22	3.72e-21	40.565	Down-Regulated
CLIC5	-4.53376	10.8092	-18.9106	4.39e-37	1.55e-34	73.9182	Down-Regulated
CLSPN	3.05045	5.25546	12.7031	1.24e-23	3.43e-22	43.1216	Up-Regulated
CLU	-1.32151	12.6348	-5.26462	6.61e-07	2.07e-06	5.0119	Down-Regulated
CLUL1	-1.47284	4.75654	-5.61712	1.37e-07	4.69e-07	6.54389	Down-Regulated
CMA1	-1.23173	1.95895	-4.28488	3.82e-05	9.54e-05	1.09458	Down-Regulated
CMAH	-1.12183	8.78008	-5.88237	4.06e-08	1.48e-07	7.73366	Down-Regulated
CMTM1	1.11121	6.53601	8.52143	7.07e-14	5.21e-13	20.8026	Up-Regulated
CMTM2	-2.01346	3.50938	-9.92976	3.75e-17	4.24e-16	28.2831	Down-Regulated
CMTM5	-2.11869	1.93477	-11.6036	4.45e-21	8.4e-20	37.2669	Down-Regulated
CNFN	2.32279	3.92308	10.4481	2.28e-18	3.01e-17	31.0648	Up-Regulated
CNGA1	1.14862	3.36629	4.6923	7.51e-06	2.06e-05	2.65788	Up-Regulated
CNGA3	1.73682	2.71579	5.20565	8.56e-07	2.64e-06	4.76145	Up-Regulated
CNGA4	-2.16624	3.95347	-6.01864	2.15e-08	8.13e-08	8.35635	Down-Regulated
CNGB1	1.16068	3.07806	4.14419	6.55e-05	0.000157994	0.57848	Up-Regulated
CNKSR2	-2.21726	4.21466	-9.82051	6.76e-17	7.38e-16	27.6977	Down-Regulated
CNN1	-1.3705	8.6438	-6.45831	2.64e-09	1.11e-08	10.414	Down-Regulated
CNR1	-2.11231	7.17223	-7.95887	1.36e-12	8.58e-12	17.8786	Down-Regulated
CNRIP1	-1.29117	7.99368	-10.4324	2.48e-18	3.26e-17	30.9808	Down-Regulated
CNTD2	3.05788	3.33451	9.32614	9.67e-16	9.14e-15	25.0571	Up-Regulated
CNTFR	-3.00736	3.80842	-10.9598	1.43e-19	2.2e-18	33.814	Down-Regulated
CNTN1	-1.53464	6.33322	-4.71236	6.92e-06	1.91e-05	2.73738	Down-Regulated
CNTN4	-1.37305	6.28375	-6.78204	5.4e-10	2.47e-09	11.9721	Down-Regulated
CNTN6	-5.32693	5.57647	-20.4983	3.39e-40	2.33e-37	81.0274	Down-Regulated
CNTNAP3	-1.45447	4.89369	-6.14448	1.19e-08	4.63e-08	8.93794	Down-Regulated
COBL	-1.26619	9.8293	-6.95289	2.31e-10	1.11e-09	12.8075	Down-Regulated
COCH	3.32229	5.38009	11.4355	1.1e-20	1.95e-19	36.3667	Up-Regulated
COL10A1	4.97718	7.22124	14.7582	2.68e-28	1.57e-26	53.8057	Up-Regulated
COL11A1	6.35008	5.48504	11.7511	2.01e-21	3.98e-20	38.0561	Up-Regulated
COL13A1	-1.86524	6.52304	-9.10456	3.17e-15	2.77e-14	23.8791	Down-Regulated
COL15A1	1.26977	9.66475	4.89695	3.21e-06	9.23e-06	3.47945	Up-Regulated
COL17A1	3.52909	6.39553	7.95965	1.35e-12	8.55e-12	17.8826	Up-Regulated
COL1A1	3.18812	13.983	11.0949	6.91e-20	1.11e-18	34.5394	Up-Regulated
COL1A2	1.63811	14.2765	6.71506	7.52e-10	3.39e-09	11.647	Up-Regulated
COL21A1	-1.14179	7.18851	-4.76404	5.59e-06	1.56e-05	2.9432	Down-Regulated
COL22A1	2.47901	3.69685	8.36078	1.65e-13	1.17e-12	19.9626	Up-Regulated
COL24A1	1.8777	4.32541	9.59779	2.24e-16	2.3e-15	26.5063	Up-Regulated
COL29A1	-1.85734	7.06754	-9.09854	3.27e-15	2.85e-14	23.8471	Down-Regulated
COL3A1	2.85968	13.8803	10.5113	1.62e-18	2.18e-17	31.4046	Up-Regulated
COL4A3	-3.36254	8.32804	-11.5819	5e-21	9.35e-20	37.1509	Down-Regulated
COL4A4	-2.17954	9.22564	-10.0659	1.8e-17	2.11e-16	29.0128	Down-Regulated
COL4A5	-1.66875	8.37709	-7.98352	1.19e-12	7.61e-12	18.0056	Down-Regulated
COL4A6	-2.17288	4.75819	-7.47676	1.64e-11	9.11e-11	15.4189	Down-Regulated
COL5A1	2.19599	11.4495	9.50436	3.71e-16	3.7e-15	26.0073	Up-Regulated
COL5A2	2.29545	10.8021	10.1041	1.46e-17	1.74e-16	29.2177	Up-Regulated
COL6A3	1.43004	13.1787	7.14381	8.88e-11	4.48e-10	13.7509	Up-Regulated
COL6A6	-3.39614	8.16941	-13.197	9.04e-25	2.9e-23	45.7246	Down-Regulated
COL7A1	2.86233	5.6006	9.3085	1.06e-15	9.96e-15	24.9631	Up-Regulated
COL9A3	1.32322	3.51288	4.94486	2.62e-06	7.62e-06	3.67513	Up-Regulated
COLEC10	-3.18956	3.38483	-13.596	1.11e-25	4.16e-24	47.8127	Down-Regulated
COLEC11	-1.00006	4.25084	-4.27357	3.99e-05	9.94e-05	1.05264	Down-Regulated
COLEC12	-1.81587	10.3484	-9.59626	2.26e-16	2.32e-15	26.4981	Down-Regulated
COMP	3.19855	7.04265	7.39386	2.5e-11	1.35e-10	15.001	Up-Regulated
CORO2B	-2.28886	6.90441	-13.2871	5.62e-25	1.87e-23	46.1974	Down-Regulated
CORO6	-1.04744	3.84821	-5.07364	1.51e-06	4.53e-06	4.20715	Down-Regulated
COX4I2	-2.64541	6.90522	-15.569	4.38e-30	3.43e-28	57.8999	Down-Regulated
COX6B2	2.10991	1.87616	8.90765	9.08e-15	7.48e-14	22.836	Up-Regulated
COX7A1	-1.76499	7.29702	-10.2529	6.54e-18	8.12e-17	30.0169	Down-Regulated
CP	2.84842	10.5731	7.91143	1.74e-12	1.09e-11	17.6345	Up-Regulated
CPA3	-2.12328	9.43991	-7.64944	6.74e-12	3.94e-11	16.2943	Down-Regulated
CPAMD8	-2.74282	9.3641	-10.9954	1.18e-19	1.84e-18	34.0052	Down-Regulated
CPB2	-5.82995	6.58314	-14.813	2.03e-28	1.24e-26	54.0849	Down-Regulated
CPD	1.16234	11.9849	7.50716	1.4e-11	7.85e-11	15.5725	Up-Regulated
CPEB1	-1.17915	3.5757	-4.66677	8.34e-06	2.27e-05	2.55704	Down-Regulated
CPM	-1.12976	11.9863	-5.32444	5.08e-07	1.62e-06	5.26771	Down-Regulated
CPNE4	2.53294	3.75861	8.32311	2.01e-13	1.41e-12	19.7661	Up-Regulated
CPNE5	1.48196	6.45855	6.5313	1.85e-09	7.96e-09	10.7623	Up-Regulated
CPNE7	2.33399	4.57176	8.86057	1.17e-14	9.48e-14	22.5872	Up-Regulated
CPS1	1.48234	5.77187	3.32455	0.00118884	0.00239801	-2.16202	Up-Regulated
CPXM1	2.90263	6.72963	10.1892	9.23e-18	1.12e-16	29.6747	Up-Regulated
CPZ	1.09924	7.67133	4.86502	3.67e-06	1.05e-05	3.34977	Up-Regulated
CR2	2.89038	5.41233	6.19863	9.17e-09	3.64e-08	9.19007	Up-Regulated
CRABP1	2.18943	1.88861	5.60533	1.45e-07	4.93e-07	6.49173	Up-Regulated
CRABP2	4.81075	8.31483	14.2917	2.96e-27	1.4e-25	51.4169	Up-Regulated
CRB1	-1.14991	2.26268	-5.2458	7.18e-07	2.24e-06	4.93179	Down-Regulated
CREB3L4	1.16986	8.16649	9.12696	2.81e-15	2.47e-14	23.998	Up-Regulated
CREG2	1.25222	1.38786	5.39546	3.71e-07	1.2e-06	5.57369	Up-Regulated
CRH	-1.23	0.991578	-5.29909	5.68e-07	1.79e-06	5.1591	Down-Regulated
CRHBP	-1.2474	2.48838	-6.47305	2.45e-09	1.04e-08	10.4842	Down-Regulated
CRIM1	-1.37354	11.3445	-10.3759	3.37e-18	4.37e-17	30.677	Down-Regulated
CRISP2	-1.59486	2.67008	-4.12719	6.98e-05	0.000167771	0.516955	Down-Regulated
CRISP3	-1.61866	2.86566	-4.25954	4.21e-05	0.000104706	1.0007	Down-Regulated
CRLF1	2.07911	7.46748	4.79673	4.88e-06	1.37e-05	3.07421	Up-Regulated
CRTAC1	-3.71567	9.80656	-12.0679	3.67e-22	8.05e-21	39.7476	Down-Regulated
CRTAM	-1.23884	5.76088	-6.26428	6.71e-09	2.7e-08	9.49718	Down-Regulated
CRY2	-1.30517	10.402	-11.3734	1.54e-20	2.7e-19	36.0337	Down-Regulated
CRYAB	-2.27105	8.12778	-14.791	2.27e-28	1.36e-26	53.9732	Down-Regulated
CRYGN	1.5117	1.33345	6.60108	1.32e-09	5.76e-09	11.097	Up-Regulated
CRYM	-1.00592	7.34051	-2.78478	0.00626579	0.0112879	-3.69417	Down-Regulated
CSAG1	1.7444	1.03854	4.44393	2.05e-05	5.31e-05	1.69298	Up-Regulated
CSAG2	1.04739	0.54199	3.44422	0.000800065	0.00165195	-1.79181	Up-Regulated
CSF2RB	-1.038	9.47563	-5.61919	1.36e-07	4.65e-07	6.55308	Down-Regulated
CSF3	-4.07295	5.71045	-8.14528	5.12e-13	3.41e-12	18.8418	Down-Regulated
CSF3R	-2.05142	9.97029	-10.0045	2.5e-17	2.9e-16	28.6835	Down-Regulated
CSMD1	-1.68052	3.43867	-4.70833	7.03e-06	1.94e-05	2.72138	Down-Regulated
CSMD2	1.71022	4.14244	6.77387	5.63e-10	2.57e-09	11.9323	Up-Regulated
CSRNP1	-2.11102	11.0142	-12.1247	2.71e-22	6.03e-21	40.0505	Down-Regulated
CST1	5.60996	3.94911	11.7859	1.67e-21	3.36e-20	38.2424	Up-Regulated
CST2	1.92218	3.17771	4.95265	2.54e-06	7.39e-06	3.70707	Up-Regulated
CST4	2.72288	1.53925	9.58732	2.37e-16	2.42e-15	26.4503	Up-Regulated
CST5	-2.52833	3.41223	-8.58093	5.16e-14	3.86e-13	21.1147	Down-Regulated
CST6	-1.53244	7.65347	-5.16438	1.02e-06	3.13e-06	4.58721	Down-Regulated
CSTA	-1.36045	7.70591	-7.87347	2.12e-12	1.31e-11	17.4395	Down-Regulated
CSTF2	1.13183	8.2335	17.9469	3.97e-35	9.15e-33	69.4447	Up-Regulated
CT45A1	-1.44911	1.71712	-3.41966	0.000868498	0.00178303	-1.86866	Down-Regulated
CTDSPL	-1.19576	10.5334	-13.5809	1.2e-25	4.47e-24	47.7339	Down-Regulated
CTF1	-1.07911	7.63469	-7.12875	9.57e-11	4.81e-10	13.6761	Down-Regulated
CTGF	-1.12727	12.7608	-5.9588	2.84e-08	1.06e-07	8.08198	Down-Regulated
CTH	1.07628	6.37944	6.84661	3.92e-10	1.83e-09	12.2868	Up-Regulated
CTHRC1	3.92944	8.18741	14.1389	6.53e-27	2.92e-25	50.6296	Up-Regulated
CTNNAL1	-1.31341	10.1634	-10.0766	1.7e-17	2e-16	29.0703	Down-Regulated
CTNND2	-3.45169	4.78157	-8.27078	2.65e-13	1.83e-12	19.4936	Down-Regulated
CTSG	-1.89787	4.92107	-5.45488	2.85e-07	9.35e-07	5.83156	Down-Regulated
CTSH	-1.65395	13.3635	-8.33076	1.93e-13	1.36e-12	19.806	Down-Regulated
CTSK	1.08951	9.95894	4.91296	3e-06	8.66e-06	3.5447	Up-Regulated
CTSL2	1.8723	5.39991	6.81178	4.66e-10	2.15e-09	12.1168	Up-Regulated
CTSW	-1.46598	7.82418	-6.71135	7.66e-10	3.45e-09	11.629	Down-Regulated
CTTNBP2	-1.02552	5.56276	-4.92619	2.84e-06	8.22e-06	3.59874	Down-Regulated
CWH43	-2.95199	3.03674	-7.59972	8.71e-12	5.01e-11	16.0415	Down-Regulated
CX3CL1	-1.4164	11.0724	-6.0983	1.48e-08	5.71e-08	8.72378	Down-Regulated
CX3CR1	-1.93849	7.00155	-7.68123	5.72e-12	3.37e-11	16.4561	Down-Regulated
CXCL12	-1.13211	10.2479	-6.06498	1.73e-08	6.61e-08	8.56978	Down-Regulated
CXCL13	3.81489	6.66004	7.76752	3.66e-12	2.21e-11	16.8966	Up-Regulated
CXCL14	2.37619	8.01951	5.88274	4.05e-08	1.48e-07	7.73534	Up-Regulated
CXCL17	-1.06801	11.6864	-3.49292	0.000679084	0.00141756	-1.6381	Down-Regulated
CXCL2	-2.52541	9.64615	-7.61826	7.92e-12	4.58e-11	16.1357	Down-Regulated
CXCL3	-2.06553	6.67564	-6.69306	8.38e-10	3.75e-09	11.5405	Down-Regulated
CXCR1	-2.30864	5.26123	-7.77518	3.52e-12	2.13e-11	16.9358	Down-Regulated
CXCR2	-2.24948	6.26059	-9.74193	1.03e-16	1.1e-15	27.2771	Down-Regulated
CXCR5	1.06845	4.68001	3.26517	0.00144173	0.00287561	-2.34169	Up-Regulated
CXorf22	-1.49174	2.27585	-4.54621	1.36e-05	3.62e-05	2.08592	Down-Regulated
CXorf30	-1.59677	2.63558	-4.27952	3.9e-05	9.73e-05	1.07471	Down-Regulated
CXorf36	-1.37537	8.87297	-8.56203	5.7e-14	4.25e-13	21.0155	Down-Regulated
CXorf41	-2.49131	3.17332	-5.89264	3.87e-08	1.42e-07	7.78034	Down-Regulated
CXorf49B	1.40344	0.95238	4.04155	9.63e-05	0.000226927	0.209976	Up-Regulated
CXorf57	-2.30317	5.977	-12.1301	2.63e-22	5.86e-21	40.0795	Down-Regulated
CXorf59	-1.08312	1.72155	-3.72201	0.000307529	0.000671872	-0.891983	Down-Regulated
CXorf61	2.71904	1.79072	5.83901	4.96e-08	1.79e-07	7.53714	Up-Regulated
CXorf64	1.00843	0.936353	4.19299	5.44e-05	0.000132652	0.756071	Up-Regulated
CYB5A	-1.52025	11.75	-9.47911	4.25e-16	4.2e-15	25.8725	Down-Regulated
CYBB	-1.31462	11.7197	-5.70537	9.18e-08	3.2e-07	6.93636	Down-Regulated
CYBRD1	-1.95388	12.2649	-13.7509	4.93e-26	1.95e-24	48.6195	Down-Regulated
CYGB	-1.13539	8.95056	-9.01828	5.03e-15	4.29e-14	23.4215	Down-Regulated
CYP11A1	-1.30042	3.96403	-5.169	1e-06	3.07e-06	4.60666	Down-Regulated
CYP17A1	-2.73796	2.95713	-12.1733	2.09e-22	4.76e-21	40.3094	Down-Regulated
CYP1A1	-2.31412	2.44104	-4.80454	4.72e-06	1.33e-05	3.10557	Down-Regulated
CYP1A2	-3.8934	2.65156	-13.9969	1.37e-26	5.78e-25	49.8956	Down-Regulated
CYP21A2	-1.74708	4.97785	-8.61897	4.22e-14	3.2e-13	21.3144	Down-Regulated
CYP24A1	5.41612	5.88631	12.6665	1.5e-23	4.07e-22	42.9278	Up-Regulated
CYP26A1	1.27485	1.81135	3.66238	0.000379202	0.000818571	-1.08981	Up-Regulated
CYP27A1	-1.94752	11.0355	-12.3038	1.04e-22	2.46e-21	41.0036	Down-Regulated
CYP27B1	2.27095	5.62724	10.7229	5.16e-19	7.38e-18	32.5412	Up-Regulated
CYP27C1	2.02432	3.70384	6.82558	4.36e-10	2.01e-09	12.1841	Up-Regulated
CYP2A13	-1.33383	1.54679	-4.32392	3.28e-05	8.26e-05	1.24002	Down-Regulated
CYP2A6	-2.03751	2.80905	-5.89017	3.92e-08	1.43e-07	7.76908	Down-Regulated
CYP2B7P1	-2.68535	10.3323	-6.92487	2.66e-10	1.26e-09	12.6698	Down-Regulated
CYP2D6	1.05364	3.33218	3.55269	0.000554136	0.00117077	-1.4471	Up-Regulated
CYP2F1	-3.47643	3.50285	-7.94575	1.45e-12	9.14e-12	17.8111	Down-Regulated
CYP39A1	-1.05723	6.61273	-5.05373	1.65e-06	4.91e-06	4.12432	Down-Regulated
CYP3A5	-1.72392	5.60543	-5.35611	4.42e-07	1.42e-06	5.40389	Down-Regulated
CYP3A7	-3.55517	3.12797	-15.4496	8e-30	5.95e-28	57.3017	Down-Regulated
CYP4A11	-1.07318	1.40499	-6.70963	7.72e-10	3.47e-09	11.6207	Down-Regulated
CYP4B1	-4.80302	11.0354	-12.142	2.47e-22	5.53e-21	40.1427	Down-Regulated
CYP4F11	1.18953	4.45578	2.26378	0.0254637	0.0409469	-4.94618	Up-Regulated
CYP4F12	-1.28501	3.69617	-4.3686	2.75e-05	7.02e-05	1.40764	Down-Regulated
CYP4X1	-1.09828	7.86428	-4.14814	6.45e-05	0.000155754	0.592795	Down-Regulated
CYP4Z1	-1.79591	2.71462	-6.48156	2.35e-09	1e-08	10.5248	Down-Regulated
CYP4Z2P	-1.69758	2.05837	-7.31408	3.75e-11	1.98e-10	14.6005	Down-Regulated
CYR61	-1.14858	12.6365	-6.27878	6.26e-09	2.53e-08	9.56522	Down-Regulated
CYS1	-2.46093	7.23334	-11.7611	1.91e-21	3.78e-20	38.1099	Down-Regulated
CYYR1	-2.04942	9.08221	-16.0612	3.74e-31	3.73e-29	60.3473	Down-Regulated
D4S234E	-1.08853	4.60414	-3.94767	0.000136365	0.000314736	-0.120976	Down-Regulated
DAAM2	-1.32239	9.56709	-8.26698	2.71e-13	1.86e-12	19.4738	Down-Regulated
DAB2	-1.04898	10.9908	-7.2769	4.53e-11	2.37e-10	14.4143	Down-Regulated
DAB2IP	-1.13614	10.6134	-12.2678	1.26e-22	2.95e-21	40.8122	Down-Regulated
DACH1	-2.79254	7.11525	-15.858	1.03e-30	9.65e-29	59.3405	Down-Regulated
DACT2	-1.60432	5.94707	-4.22266	4.85e-05	0.000119393	0.864791	Down-Regulated
DAO	-1.26341	1.11212	-7.53558	1.21e-11	6.84e-11	15.7163	Down-Regulated
DAPK1	-1.4225	11.2212	-10.4174	2.69e-18	3.52e-17	30.9003	Down-Regulated
DAPK2	-2.59939	9.0999	-16.34	9.4e-32	1.05e-29	61.7205	Down-Regulated
DARC	-2.69497	8.73424	-8.92901	8.1e-15	6.71e-14	22.949	Down-Regulated
DARS2	1.20098	8.80837	13.2306	7.57e-25	2.45e-23	45.901	Up-Regulated
DBF4	1.37696	7.34328	11.516	7.13e-21	1.31e-19	36.7981	Up-Regulated
DBF4B	1.14276	6.47623	8.76389	1.95e-14	1.54e-13	22.0771	Up-Regulated
DBN1	1.23013	10.468	8.756	2.04e-14	1.61e-13	22.0355	Up-Regulated
DBNDD1	1.92034	8.33915	14.3488	2.2e-27	1.07e-25	51.7109	Up-Regulated
DCAF12L2	1.22257	1.06371	5.08299	1.45e-06	4.36e-06	4.24613	Up-Regulated
DCAF13	1.23152	9.40545	13.2618	6.42e-25	2.11e-23	46.0647	Up-Regulated
DCC	-2.57867	3.95656	-10.1077	1.43e-17	1.71e-16	29.2375	Down-Regulated
DCDC2	-2.42447	6.9666	-8.86466	1.14e-14	9.29e-14	22.6088	Down-Regulated
DCDC2B	-3.0217	3.54507	-6.90197	2.98e-10	1.41e-09	12.5576	Down-Regulated
DCN	-1.23276	13.7044	-6.5432	1.74e-09	7.53e-09	10.8193	Down-Regulated
DCST2	1.42071	2.65265	7.52057	1.31e-11	7.36e-11	15.6403	Up-Regulated
DDC	-1.57139	4.66889	-4.30969	3.47e-05	8.7e-05	1.18693	Down-Regulated
DDIT4	1.16354	11.2837	5.49335	2.4e-07	7.94e-07	5.99936	Up-Regulated
DDIT4L	2.15468	5.61381	9.06308	3.96e-15	3.42e-14	23.6591	Up-Regulated
DDN	1.12701	2.29697	5.16729	1.01e-06	3.09e-06	4.59948	Up-Regulated
DDO	-1.85479	5.88396	-10.4802	1.92e-18	2.55e-17	31.2373	Down-Regulated
DDX11	1.42754	8.05977	7.54881	1.13e-11	6.42e-11	15.7833	Up-Regulated
DDX12	1.36355	5.21142	9.02027	4.98e-15	4.25e-14	23.4321	Up-Regulated
DDX43	-1.67966	3.99063	-4.89677	3.21e-06	9.24e-06	3.47872	Down-Regulated
DEFA1B	-2.71732	2.82323	-7.75564	3.9e-12	2.34e-11	16.8359	Down-Regulated
DENND2A	-1.74473	8.27206	-12.6643	1.52e-23	4.12e-22	42.9161	Down-Regulated
DENND3	-2.13993	10.3876	-19.7858	8.13e-39	3.79e-36	77.877	Down-Regulated
DEPDC1	3.69499	5.60307	15.897	8.47e-31	8.09e-29	59.5343	Up-Regulated
DEPDC1B	3.62775	5.09991	15.8188	1.25e-30	1.13e-28	59.1454	Up-Regulated
DEPDC6	1.34069	8.19857	8.6194	4.21e-14	3.19e-13	21.3167	Up-Regulated
DEPDC7	1.66894	4.24313	7.28604	4.32e-11	2.26e-10	14.46	Up-Regulated
DERL3	2.13262	8.11299	8.79441	1.66e-14	1.33e-13	22.238	Up-Regulated
DES	-3.75944	8.77829	-13.5258	1.6e-25	5.9e-24	47.4462	Down-Regulated
DGCR5	2.85563	4.67115	10.6511	7.6e-19	1.06e-17	32.1559	Up-Regulated
DGCR9	1.74023	3.32986	6.56915	1.54e-09	6.68e-09	10.9436	Up-Regulated
DGKI	1.32112	1.49896	7.82564	2.71e-12	1.66e-11	17.1941	Up-Regulated
DHCR24	-1.13613	14.1414	-10.2686	6.01e-18	7.52e-17	30.101	Down-Regulated
DHDPSL	-1.82222	3.76164	-9.69921	1.3e-16	1.37e-15	27.0485	Down-Regulated
DHH	-1.58991	2.96413	-8.23366	3.22e-13	2.2e-12	19.3006	Down-Regulated
DIO2	2.53063	6.45535	8.3112	2.14e-13	1.5e-12	19.7041	Up-Regulated
DIO3	-1.33368	3.57722	-5.50427	2.28e-07	7.58e-07	6.04713	Down-Regulated
DIRAS1	2.25563	5.30295	7.95442	1.39e-12	8.76e-12	17.8557	Up-Regulated
DIRAS3	-1.04799	5.60127	-4.30526	3.53e-05	8.85e-05	1.1704	Down-Regulated
DISP1	-1.14391	8.64846	-8.97608	6.3e-15	5.29e-14	23.1981	Down-Regulated
DIXDC1	-1.17686	8.98001	-10.8233	3e-19	4.39e-18	33.0806	Down-Regulated
DKC1	1.10559	10.0306	15.5709	4.34e-30	3.41e-28	57.9094	Up-Regulated
DKFZp779M0652	-1.36484	2.32041	-7.86662	2.19e-12	1.35e-11	17.4043	Down-Regulated
DKK2	-2.28209	7.28209	-11.3861	1.43e-20	2.52e-19	36.1021	Down-Regulated
DLC1	-2.52958	11.5303	-14.1689	5.59e-27	2.53e-25	50.7847	Down-Regulated
DLEC1	-2.1376	5.67063	-5.83274	5.11e-08	1.84e-07	7.50879	Down-Regulated
DLG5	1.22818	9.91059	10.5602	1.24e-18	1.7e-17	31.6675	Up-Regulated
DLGAP1	-1.21186	3.92602	-3.93008	0.000145454	0.000334022	-0.182311	Down-Regulated
DLGAP2	-1.29766	2.25309	-7.41908	2.2e-11	1.2e-10	15.1279	Down-Regulated
DLGAP5	4.00042	5.95533	17.0668	2.69e-33	4.18e-31	65.2549	Up-Regulated
DLL1	-1.11456	7.20953	-5.39241	3.76e-07	1.22e-06	5.56053	Down-Regulated
DLL3	3.27141	2.00029	9.20109	1.89e-15	1.71e-14	24.3917	Up-Regulated
DLX3	1.00141	4.40373	3.17562	0.00191963	0.00376015	-2.60759	Up-Regulated
DLX5	1.63103	2.74158	5.12948	1.19e-06	3.61e-06	4.44054	Up-Regulated
DLX6	1.71448	1.30927	5.27611	6.29e-07	1.97e-06	5.0609	Up-Regulated
DLX6AS	1.14461	0.828479	4.45569	1.95e-05	5.08e-05	1.73784	Up-Regulated
DMBT1	-2.57562	11.4055	-5.86496	4.4e-08	1.6e-07	7.65464	Down-Regulated
DMBX1	2.86616	1.68705	10.4366	2.42e-18	3.2e-17	31.0034	Up-Regulated
DMD	-1.43241	8.49763	-8.40276	1.32e-13	9.45e-13	20.1817	Down-Regulated
DMRT2	-1.73926	3.42994	-6.5218	1.94e-09	8.31e-09	10.7169	Down-Regulated
DMRTA2	2.45045	2.11954	6.09555	1.5e-08	5.78e-08	8.71106	Up-Regulated
DNA2	2.06608	5.79267	12.3559	7.87e-23	1.9e-21	41.2806	Up-Regulated
DNAH1	-1.24693	7.19941	-5.16927	1e-06	3.07e-06	4.6078	Down-Regulated
DNAH10	-2.25701	6.27216	-6.61982	1.2e-09	5.28e-09	11.1871	Down-Regulated
DNAH12	-2.62613	4.4828	-5.97874	2.59e-08	9.69e-08	8.17327	Down-Regulated
DNAH14	1.7196	5.6462	13.3434	4.18e-25	1.42e-23	46.4925	Up-Regulated
DNAH6	-2.24919	5.3858	-6.18751	9.67e-09	3.82e-08	9.1382	Down-Regulated
DNAH7	-1.74673	5.45116	-5.17298	9.86e-07	3.02e-06	4.62344	Down-Regulated
DNAH9	-3.5458	5.95087	-7.13354	9.35e-11	4.7e-10	13.6999	Down-Regulated
DNAI1	-2.74554	4.44677	-5.90232	3.7e-08	1.36e-07	7.82434	Down-Regulated
DNAI2	-3.13034	4.29482	-6.70049	8.08e-10	3.63e-09	11.5764	Down-Regulated
DNAJB4	-1.20706	8.84865	-9.56588	2.66e-16	2.7e-15	26.3358	Down-Regulated
DNAJC12	2.90684	5.71418	10.3586	3.7e-18	4.76e-17	30.5841	Up-Regulated
DNAJC22	2.81801	4.07058	10.971	1.35e-19	2.08e-18	33.8744	Up-Regulated
DNAJC5B	-1.36169	5.57933	-5.48685	2.47e-07	8.16e-07	5.97096	Down-Regulated
DNALI1	-1.06996	9.01737	-4.76036	5.67e-06	1.58e-05	2.9285	Down-Regulated
DNASE1	1.33297	5.47436	8.90144	9.38e-15	7.72e-14	22.8032	Up-Regulated
DNASE1L3	-3.76492	6.43081	-10.8937	2.05e-19	3.07e-18	33.4592	Down-Regulated
DNASE2B	-3.28046	4.16783	-12.055	3.94e-22	8.59e-21	39.6789	Down-Regulated
DNM1	1.09641	7.00335	5.45323	2.87e-07	9.42e-07	5.82436	Up-Regulated
DNM3	-1.16759	7.15364	-6.23265	7.8e-09	3.12e-08	9.34903	Down-Regulated
DNMT3A	1.05186	8.91585	9.66476	1.56e-16	1.64e-15	26.8642	Up-Regulated
DNMT3B	1.51434	5.42553	8.03072	9.33e-13	6.04e-12	18.2492	Up-Regulated
DNTTIP1	1.21496	9.44958	8.24652	3.01e-13	2.06e-12	19.3674	Up-Regulated
DOCK11	-1.42059	9.54662	-9.5041	3.72e-16	3.7e-15	26.0059	Down-Regulated
DOCK2	-1.03984	9.82185	-5.78449	6.38e-08	2.27e-07	7.29112	Down-Regulated
DOCK4	-1.6668	9.89518	-13.8545	2.87e-26	1.17e-24	49.1578	Down-Regulated
DOCK8	-1.0911	10.429	-7.41912	2.2e-11	1.2e-10	15.1282	Down-Regulated
DOCK9	-1.02044	11.1341	-9.22424	1.67e-15	1.52e-14	24.5148	Down-Regulated
DOK2	-2.01485	9.16328	-11.5117	7.3e-21	1.33e-19	36.7747	Down-Regulated
DOK5	2.13688	4.34248	7.52267	1.29e-11	7.3e-11	15.651	Up-Regulated
DOK6	-1.34969	6.63594	-6.99191	1.9e-10	9.21e-10	12.9995	Down-Regulated
DOK7	-2.23173	5.74073	-9.58508	2.4e-16	2.45e-15	26.4383	Down-Regulated
DONSON	1.56441	7.1724	14.2017	4.72e-27	2.17e-25	50.9537	Up-Regulated
DPCR1	-2.29764	6.69711	-5.58079	1.62e-07	5.48e-07	6.38336	Down-Regulated
DPEP1	2.24168	3.55282	6.54562	1.72e-09	7.45e-09	10.8309	Up-Regulated
DPEP2	-2.65895	7.41733	-14.7351	3.02e-28	1.74e-26	53.688	Down-Regulated
DPF1	1.01285	1.89897	4.31496	3.4e-05	8.54e-05	1.20658	Up-Regulated
DPP6	-3.33909	3.95362	-12.1559	2.29e-22	5.17e-21	40.2166	Down-Regulated
DPT	-1.39704	9.40011	-5.67842	1.04e-07	3.6e-07	6.81616	Down-Regulated
DPYS	-1.22483	2.53524	-5.35884	4.37e-07	1.4e-06	5.41564	Down-Regulated
DPYSL2	-1.56003	12.3962	-15.379	1.14e-29	8.28e-28	56.9473	Down-Regulated
DPYSL4	1.19635	3.99875	4.06823	8.72e-05	0.000206702	0.305111	Up-Regulated
DPYSL5	1.05909	0.736922	3.1622	0.00200278	0.00390994	-2.64688	Up-Regulated
DQX1	1.08282	1.85881	3.90754	0.000157948	0.000360738	-0.260614	Up-Regulated
DRAM1	-1.53921	11.8323	-9.53508	3.15e-16	3.16e-15	26.1713	Down-Regulated
DRD1	-1.20703	3.8312	-4.34136	3.06e-05	7.75e-05	1.30532	Down-Regulated
DRP2	2.11209	2.53571	9.89376	4.55e-17	5.11e-16	28.0901	Up-Regulated
DSCAML1	-1.40711	4.31699	-4.89617	3.22e-06	9.26e-06	3.47628	Down-Regulated
DSCC1	1.68793	6.14917	9.82705	6.52e-17	7.14e-16	27.7328	Up-Regulated
DSG2	1.39068	11.3338	8.99837	5.59e-15	4.72e-14	23.3161	Up-Regulated
DSG3	1.05983	1.48677	3.29765	0.00129776	0.00260644	-2.24374	Up-Regulated
DSP	1.99773	11.5665	8.63406	3.89e-14	2.97e-13	21.3937	Up-Regulated
DST	-1.24839	11.7276	-7.85175	2.37e-12	1.46e-11	17.328	Down-Regulated
DTHD1	-2.27266	4.65402	-6.14539	1.18e-08	4.62e-08	8.94214	Down-Regulated
DTL	2.13339	7.14144	10.4083	2.82e-18	3.69e-17	30.8514	Up-Regulated
DTX2	1.15161	9.33782	9.28842	1.18e-15	1.1e-14	24.8563	Up-Regulated
DTX4	-1.01537	10.521	-7.85747	2.3e-12	1.42e-11	17.3574	Down-Regulated
DTYMK	1.15124	8.45135	10.5692	1.18e-18	1.62e-17	31.7159	Up-Regulated
DUOX1	-3.8082	10.3205	-13.4718	2.13e-25	7.65e-24	47.1641	Down-Regulated
DUOX2	-1.61969	6.41564	-5.03515	1.79e-06	5.29e-06	4.04722	Down-Regulated
DUOXA1	-3.12472	8.05716	-11.6664	3.17e-21	6.07e-20	37.6033	Down-Regulated
DUOXA2	-2.24857	4.87074	-8.16943	4.51e-13	3.02e-12	18.967	Down-Regulated
DUS4L	1.02939	6.87933	11.9106	8.54e-22	1.78e-20	38.9086	Up-Regulated
DUSP1	-1.50193	13.3432	-6.98057	2.01e-10	9.72e-10	12.9436	Down-Regulated
DUSP13	2.54007	1.65723	7.33658	3.34e-11	1.77e-10	14.7132	Up-Regulated
DUSP26	-1.65824	4.02989	-6.6835	8.78e-10	3.92e-09	11.4943	Down-Regulated
DUSP27	-2.91508	2.79506	-12.974	2.94e-24	8.81e-23	44.5518	Down-Regulated
DUSP4	1.76373	8.21451	7.85836	2.29e-12	1.41e-11	17.3619	Up-Regulated
DUSP5P	1.33088	1.82569	6.84362	3.98e-10	1.85e-09	12.2722	Up-Regulated
DUSP8	-1.32205	8.56066	-9.17839	2.14e-15	1.91e-14	24.2711	Down-Regulated
DUSP9	3.05398	2.62073	9.34606	8.69e-16	8.26e-15	25.1632	Up-Regulated
DVWA	1.46936	0.903653	8.09235	6.76e-13	4.44e-12	18.5677	Up-Regulated
DYDC1	-1.70714	2.30294	-4.94342	2.64e-06	7.67e-06	3.66923	Down-Regulated
DYDC2	-1.90509	4.82151	-4.71449	6.86e-06	1.89e-05	2.74582	Down-Regulated
DYNC2H1	-1.17835	8.12553	-6.08501	1.57e-08	6.05e-08	8.66233	Down-Regulated
DYNLRB2	-2.52499	3.93227	-6.47606	2.42e-09	1.03e-08	10.4986	Down-Regulated
E2F1	1.02187	7.79304	6.63887	1.09e-09	4.84e-09	11.2788	Up-Regulated
E2F2	2.1824	5.68219	12.0849	3.35e-22	7.38e-21	39.8386	Up-Regulated
E2F3	1.46215	8.55492	12.2926	1.1e-22	2.6e-21	40.9442	Up-Regulated
E2F5	1.03004	7.27357	8.12976	5.56e-13	3.68e-12	18.7614	Up-Regulated
E2F7	2.29207	4.67332	9.37268	7.53e-16	7.23e-15	25.305	Up-Regulated
E2F8	3.39067	5.23065	17.0558	2.84e-33	4.38e-31	65.2015	Up-Regulated
ECE2	1.95361	6.82307	14.6314	5.14e-28	2.8e-26	53.1589	Up-Regulated
ECEL1	2.72919	2.51734	7.82345	2.74e-12	1.68e-11	17.1829	Up-Regulated
ECM1	1.01335	9.52905	5.12324	1.22e-06	3.7e-06	4.41438	Up-Regulated
ECM2	-1.0746	8.50195	-6.62554	1.17e-09	5.15e-09	11.2146	Down-Regulated
ECSCR	-2.25959	7.2077	-16.1822	2.05e-31	2.15e-29	60.9443	Down-Regulated
ECT2	2.03921	8.87085	14.0725	9.22e-27	3.99e-25	50.2869	Up-Regulated
ECT2L	-2.10616	4.83958	-5.94164	3.08e-08	1.14e-07	8.00358	Down-Regulated
EDA	-1.30109	6.72727	-6.77185	5.68e-10	2.59e-09	11.9225	Down-Regulated
EDN1	-1.79158	9.74028	-7.89336	1.91e-12	1.19e-11	17.5416	Down-Regulated
EDN2	2.0812	4.88267	5.24875	7.09e-07	2.21e-06	4.94433	Up-Regulated
EDN3	-3.33921	2.73155	-12.9116	4.09e-24	1.2e-22	44.2232	Down-Regulated
EDNRB	-3.65076	9.90337	-20.5046	3.3e-40	2.33e-37	81.0547	Down-Regulated
EEF1A2	4.77277	5.67736	10.6594	7.27e-19	1.02e-17	32.2004	Up-Regulated
EFCAB1	-2.97453	5.96293	-7.2337	5.64e-11	2.91e-10	14.1984	Down-Regulated
EFCAB6	-1.27604	5.02143	-5.17735	9.68e-07	2.97e-06	4.6419	Down-Regulated
EFEMP1	-1.90885	11.857	-11.3489	1.75e-20	3.06e-19	35.9024	Down-Regulated
EFHA2	-1.43243	6.18022	-10.4323	2.48e-18	3.27e-17	30.9801	Down-Regulated
EFHB	-2.35782	4.59692	-6.28076	6.2e-09	2.51e-08	9.57453	Down-Regulated
EFNA2	1.08473	0.574593	5.74424	7.68e-08	2.71e-07	7.11032	Up-Regulated
EFNA3	2.53607	5.82853	16.317	1.05e-31	1.17e-29	61.6078	Up-Regulated
EFNA4	2.06185	7.51037	14.9646	9.35e-29	5.87e-27	54.8552	Up-Regulated
EFNA5	1.15633	8.62965	6.60003	1.32e-09	5.79e-09	11.0919	Up-Regulated
EFNB1	-1.04008	9.74442	-6.71334	7.58e-10	3.41e-09	11.6386	Down-Regulated
EFR3B	-1.92348	7.70542	-9.30817	1.06e-15	9.97e-15	24.9614	Down-Regulated
EGF	1.83664	5.75467	6.40345	3.44e-09	1.43e-08	10.1534	Up-Regulated
EGFL7	-1.43032	9.94364	-8.67949	3.06e-14	2.36e-13	21.6326	Down-Regulated
EGFL8	-1.34453	5.50312	-6.09602	1.49e-08	5.76e-08	8.71324	Down-Regulated
EGFLAM	1.06837	6.13964	5.28289	6.1e-07	1.92e-06	5.08987	Up-Regulated
EGLN3	2.40574	8.44982	10.3681	3.51e-18	4.54e-17	30.6352	Up-Regulated
EGOT	1.07245	1.9209	4.90144	3.15e-06	9.07e-06	3.49775	Up-Regulated
EGR1	-1.49065	12.7017	-6.16714	1.07e-08	4.19e-08	9.04329	Down-Regulated
EGR2	-1.64646	8.84609	-7.92255	1.64e-12	1.03e-11	17.6917	Down-Regulated
EGR3	-1.36841	7.98103	-5.24291	7.27e-07	2.27e-06	4.91949	Down-Regulated
EHD2	-1.33982	12.1622	-11.3259	1.99e-20	3.43e-19	35.779	Down-Regulated
EIF3C	1.12707	7.24736	4.27857	3.91e-05	9.76e-05	1.07119	Up-Regulated
EIF4E3	-1.01399	9.76022	-9.81848	6.83e-17	7.46e-16	27.6869	Down-Regulated
EIF4EBP1	1.18807	8.76973	6.84147	4.03e-10	1.87e-09	12.2616	Up-Regulated
ELAVL2	1.67672	2.04756	5.77622	6.63e-08	2.35e-07	7.25391	Up-Regulated
ELAVL4	1.0047	1.48854	4.67564	8.04e-06	2.2e-05	2.59202	Up-Regulated
ELF5	-1.75916	7.29576	-5.27501	6.32e-07	1.98e-06	5.05623	Down-Regulated
ELMO1	-1.2165	9.1814	-10.0791	1.67e-17	1.97e-16	29.0841	Down-Regulated
ELMOD1	-1.83419	3.10924	-8.05725	8.12e-13	5.3e-12	18.3862	Down-Regulated
ELOVL2	1.66784	4.05433	6.62304	1.18e-09	5.21e-09	11.2026	Up-Regulated
ELOVL3	-1.0486	3.73451	-4.71553	6.83e-06	1.88e-05	2.74994	Down-Regulated
ELOVL4	1.31502	4.1114	5.28387	6.08e-07	1.91e-06	5.09407	Up-Regulated
ELOVL6	1.40695	7.36765	6.30983	5.39e-09	2.2e-08	9.71123	Up-Regulated
EMCN	-2.84331	9.10546	-16.3239	1.02e-31	1.14e-29	61.6414	Down-Regulated
EME1	2.30864	4.60363	13.1416	1.21e-24	3.78e-23	45.434	Up-Regulated
EMILIN2	-1.05756	9.83636	-7.36982	2.82e-11	1.51e-10	14.8802	Down-Regulated
EML1	-1.6773	8.74554	-10.5982	1.01e-18	1.4e-17	31.8716	Down-Regulated
EML5	-1.19182	5.16645	-9.56796	2.64e-16	2.67e-15	26.3469	Down-Regulated
EMP1	-1.1366	12.0741	-6.15382	1.14e-08	4.45e-08	8.98135	Down-Regulated
EMP2	-2.93283	13.5524	-21.4567	5.22e-42	5.11e-39	85.1637	Down-Regulated
EMP3	-1.03337	9.99721	-6.39806	3.53e-09	1.47e-08	10.1279	Down-Regulated
EMR1	-3.16117	6.28963	-11.4825	8.54e-21	1.54e-19	36.6184	Down-Regulated
EMR3	-2.89405	4.74044	-10.5237	1.51e-18	2.05e-17	31.4714	Down-Regulated
EN2	1.79315	1.60451	6.82491	4.37e-10	2.02e-09	12.1809	Up-Regulated
ENAM	-1.06282	3.61061	-3.71498	0.000315257	0.00068795	-0.915437	Down-Regulated
ENC1	1.17779	10.3587	9.87404	5.06e-17	5.65e-16	27.9844	Up-Regulated
ENDOU	-1.98989	2.26776	-12.9355	3.6e-24	1.06e-22	44.3489	Down-Regulated
ENG	-1.49542	12.3398	-11.6811	2.93e-21	5.63e-20	37.6817	Down-Regulated
ENHO	-1.53618	4.22644	-5.63998	1.24e-07	4.25e-07	6.64525	Down-Regulated
ENKUR	-1.89543	5.39246	-4.63078	9.66e-06	2.62e-05	2.41551	Down-Regulated
ENO1	1.26372	14.6725	13.324	4.63e-25	1.56e-23	46.3907	Up-Regulated
ENPP3	1.07608	5.41076	2.70435	0.00788382	0.0139711	-3.90242	Up-Regulated
ENPP6	-1.53728	3.54454	-9.49842	3.83e-16	3.81e-15	25.9756	Down-Regulated
ENTPD2	1.46335	4.55158	5.40639	3.54e-07	1.15e-06	5.62102	Up-Regulated
ENTPD7	1.29469	8.39229	12.5297	3.11e-23	8.02e-22	42.2035	Up-Regulated
ENTPD8	2.89515	3.05105	9.30821	1.06e-15	9.97e-15	24.9616	Up-Regulated
EPAS1	-2.67804	14.0988	-19.8342	6.54e-39	3.2e-36	78.093	Down-Regulated
EPB41L2	-1.24672	10.5254	-9.63303	1.86e-16	1.92e-15	26.6946	Down-Regulated
EPB41L3	-1.06729	9.68868	-6.42618	3.08e-09	1.29e-08	10.2613	Down-Regulated
EPB41L4A	-1.09249	8.82989	-6.96165	2.21e-10	1.06e-09	12.8505	Down-Regulated
EPB41L5	-1.48438	9.81698	-13.7694	4.47e-26	1.78e-24	48.7155	Down-Regulated
EPB42	-1.28706	0.83604	-6.6825	8.82e-10	3.94e-09	11.4894	Down-Regulated
EPCAM	1.4022	12.3348	15.6729	2.6e-30	2.19e-28	58.419	Up-Regulated
EPHA10	3.29767	5.52342	13.6807	7.11e-26	2.74e-24	48.254	Up-Regulated
EPHB1	1.47177	4.82057	5.91847	3.43e-08	1.26e-07	7.89789	Up-Regulated
EPHB2	2.24376	8.24813	11.2659	2.74e-20	4.67e-19	35.4575	Up-Regulated
EPHB3	1.16006	8.4418	7.18697	7.14e-11	3.64e-10	13.9655	Up-Regulated
EPHB6	-1.69283	7.17781	-8.73302	2.3e-14	1.8e-13	21.9144	Down-Regulated
EPHX2	-1.38296	7.97565	-7.02815	1.59e-10	7.75e-10	13.1781	Down-Regulated
EPHX3	1.87834	7.11053	9.89343	4.56e-17	5.12e-16	28.0883	Up-Regulated
EPHX4	2.82959	4.55465	10.1887	9.26e-18	1.13e-16	29.6718	Up-Regulated
EPM2A	-1.07476	6.98389	-14.698	3.65e-28	2.07e-26	53.4991	Down-Regulated
EPN3	3.28374	6.54532	13.6114	1.02e-25	3.85e-24	47.8929	Up-Regulated
EPR1	3.36425	6.71636	14.9265	1.14e-28	7.04e-27	54.6621	Up-Regulated
EPS8L3	1.67809	1.15889	4.35928	2.86e-05	7.26e-05	1.37258	Up-Regulated
EPT1	1.14717	9.56409	12.4604	4.5e-23	1.14e-21	41.8357	Up-Regulated
EPYC	2.68905	1.75678	8.19684	3.91e-13	2.64e-12	19.1093	Up-Regulated
ERBB4	-2.97741	6.36515	-11.3514	1.73e-20	3.02e-19	35.9157	Down-Regulated
ERCC6L	2.99435	4.90651	17.2276	1.24e-33	2.01e-31	66.0275	Up-Regulated
ERG	-2.01214	9.39781	-15.4408	8.36e-30	6.19e-28	57.2577	Down-Regulated
ERO1L	2.02025	10.3481	13.1694	1.05e-24	3.32e-23	45.58	Up-Regulated
ERVFRDE1	-2.62993	3.31589	-14.5692	7.08e-28	3.74e-26	52.8411	Down-Regulated
ESAM	-2.08252	10.7447	-16.4738	4.86e-32	5.77e-30	62.3762	Down-Regulated
ESCO2	2.59567	5.03591	13.6918	6.71e-26	2.6e-24	48.3118	Up-Regulated
ESPL1	3.06897	5.9361	12.9612	3.14e-24	9.35e-23	44.4844	Up-Regulated
ESPN	2.05463	6.06387	6.54546	1.73e-09	7.45e-09	10.8301	Up-Regulated
ESYT3	-1.95515	8.13118	-9.42442	5.7e-16	5.56e-15	25.5808	Down-Regulated
ETNK2	1.27368	7.3249	7.72508	4.56e-12	2.72e-11	16.6798	Up-Regulated
ETS2	-1.0561	12.1682	-8.03748	9.01e-13	5.84e-12	18.2841	Down-Regulated
ETV1	-1.32891	10.1823	-8.96433	6.71e-15	5.61e-14	23.1359	Down-Regulated
ETV4	3.40844	7.49869	17.9201	4.5e-35	1.02e-32	69.3185	Up-Regulated
ETV5	-1.12094	10.4654	-8.65789	3.43e-14	2.63e-13	21.519	Down-Regulated
EVI2B	-1.19459	9.95544	-7.37464	2.76e-11	1.48e-10	14.9043	Down-Regulated
EVPLL	-1.25103	5.16481	-4.67696	8e-06	2.19e-05	2.59724	Down-Regulated
EXD1	-1.78598	2.16247	-7.46972	1.7e-11	9.42e-11	15.3833	Down-Regulated
EXO1	3.58936	5.26654	16.0653	3.67e-31	3.67e-29	60.3676	Up-Regulated
EXOC3L	-1.54421	6.92039	-12.3162	9.72e-23	2.32e-21	41.0696	Down-Regulated
EXOSC5	1.05767	7.98304	9.11156	3.05e-15	2.67e-14	23.9162	Up-Regulated
EYA4	-2.01108	5.9433	-6.82584	4.35e-10	2.01e-09	12.1854	Down-Regulated
EYS	1.08228	3.88922	5.53801	1.96e-07	6.57e-07	6.19506	Up-Regulated
EZH2	2.4712	6.92833	14.5594	7.45e-28	3.9e-26	52.7906	Up-Regulated
F10	-2.13587	6.40867	-12.9786	2.87e-24	8.66e-23	44.5759	Down-Regulated
F11	-4.91344	5.20745	-14.7904	2.28e-28	1.36e-26	53.97	Down-Regulated
F12	2.82561	4.75783	14.6749	4.12e-28	2.3e-26	53.3809	Up-Regulated
F2RL1	1.05867	8.58317	6.11314	1.38e-08	5.34e-08	8.7925	Up-Regulated
F2RL3	-1.4232	7.24224	-5.5801	1.62e-07	5.49e-07	6.38029	Down-Regulated
F5	1.46169	6.64769	4.44249	2.06e-05	5.34e-05	1.68752	Up-Regulated
F8	-1.63031	9.26911	-11.082	7.41e-20	1.18e-18	34.4703	Down-Regulated
FA2H	1.76188	7.41475	8.71724	2.5e-14	1.95e-13	21.8313	Up-Regulated
FABP4	-5.9479	8.36308	-21.1848	1.69e-41	1.57e-38	84.0017	Down-Regulated
FABP5	-2.10394	7.87576	-11.5319	6.54e-21	1.21e-19	36.883	Down-Regulated
FABP7	1.2704	1.35329	3.85129	0.000193753	0.000436253	-0.454554	Up-Regulated
FADS3	-1.01504	8.92273	-9.3211	9.93e-16	9.38e-15	25.0302	Down-Regulated
FADS6	1.68946	1.1246	5.03637	1.78e-06	5.27e-06	4.05228	Up-Regulated
FAM101A	1.96939	5.32701	6.63521	1.11e-09	4.92e-09	11.2612	Up-Regulated
FAM101B	-1.08799	9.12522	-7.97737	1.23e-12	7.85e-12	17.9739	Down-Regulated
FAM105A	-1.77385	10.0842	-10.1272	1.29e-17	1.54e-16	29.3417	Down-Regulated
FAM107A	-4.52106	9.78313	-17.5933	2.13e-34	3.98e-32	67.7733	Down-Regulated
FAM111B	2.67769	6.36612	14.3342	2.38e-27	1.14e-25	51.6359	Up-Regulated
FAM124A	-1.02954	5.06051	-7.45914	1.79e-11	9.9e-11	15.3299	Down-Regulated
FAM124B	-1.66164	5.70739	-9.85402	5.64e-17	6.23e-16	27.8772	Down-Regulated
FAM125B	-1.6916	9.51068	-12.812	6.93e-24	1.99e-22	43.6971	Down-Regulated
FAM128A	1.05968	8.08598	9.75749	9.49e-17	1.01e-15	27.3603	Up-Regulated
FAM131C	1.71892	1.36921	7.85602	2.32e-12	1.43e-11	17.3499	Up-Regulated
FAM133A	1.79671	2.25989	4.3102	3.46e-05	8.69e-05	1.18883	Up-Regulated
FAM134B	-1.49008	8.65013	-7.88713	1.97e-12	1.22e-11	17.5096	Down-Regulated
FAM136A	1.06675	9.32496	14.4757	1.15e-27	5.79e-26	52.3623	Up-Regulated
FAM138F	-1.05582	0.894266	-8.18449	4.17e-13	2.81e-12	19.0452	Down-Regulated
FAM13C	-1.87494	7.27446	-11.0552	8.56e-20	1.36e-18	34.3263	Down-Regulated
FAM150A	1.44286	2.91819	4.38741	2.56e-05	6.56e-05	1.47858	Up-Regulated
FAM150B	-3.82563	4.781	-16.94	4.97e-33	7.3e-31	64.6429	Down-Regulated
FAM153A	-1.3237	3.04148	-5.16867	1e-06	3.08e-06	4.60531	Down-Regulated
FAM153B	-1.17495	1.66001	-5.85347	4.64e-08	1.68e-07	7.60258	Down-Regulated
FAM154B	-2.50199	5.78556	-6.44747	2.78e-09	1.17e-08	10.3624	Down-Regulated
FAM155B	2.74741	4.03704	10.2439	6.87e-18	8.52e-17	29.9682	Up-Regulated
FAM162B	-2.29836	6.331	-12.7673	8.79e-24	2.49e-22	43.4612	Down-Regulated
FAM163A	1.33022	1.74278	6.05005	1.85e-08	7.07e-08	8.50092	Up-Regulated
FAM166B	-2.29892	4.79295	-5.47358	2.62e-07	8.64e-07	5.91302	Down-Regulated
FAM167A	-2.34006	8.65445	-9.85172	5.71e-17	6.31e-16	27.8649	Down-Regulated
FAM167B	-1.40058	6.96543	-9.63618	1.83e-16	1.89e-15	26.7115	Down-Regulated
FAM171A2	1.77375	5.19522	7.53859	1.19e-11	6.75e-11	15.7315	Up-Regulated
FAM177B	2.54165	2.85251	7.41083	2.29e-11	1.24e-10	15.0864	Up-Regulated
FAM178B	2.26521	3.62213	8.39162	1.4e-13	1e-12	20.1235	Up-Regulated
FAM179A	-2.33688	5.63174	-6.77979	5.46e-10	2.5e-09	11.9611	Down-Regulated
FAM180A	-1.26201	4.82434	-5.79947	5.96e-08	2.13e-07	7.35857	Down-Regulated
FAM180B	-1.37376	1.18268	-7.21377	6.23e-11	3.2e-10	14.099	Down-Regulated
FAM181A	-3.01867	3.79844	-9.58138	2.45e-16	2.49e-15	26.4186	Down-Regulated
FAM182A	-1.05992	1.45342	-4.81087	4.6e-06	1.3e-05	3.13105	Down-Regulated
FAM182B	-1.19184	4.20408	-5.5346	1.99e-07	6.66e-07	6.18005	Down-Regulated
FAM183A	-2.52768	4.62151	-5.57653	1.65e-07	5.58e-07	6.36456	Down-Regulated
FAM184A	-2.11906	7.7607	-10.2942	5.23e-18	6.6e-17	30.2384	Down-Regulated
FAM189A1	-3.00182	4.72613	-14.6744	4.13e-28	2.3e-26	53.3784	Down-Regulated
FAM189A2	-3.65547	8.72705	-18.9138	4.32e-37	1.55e-34	73.9326	Down-Regulated
FAM190A	1.09353	5.06032	6.56056	1.6e-09	6.95e-09	10.9024	Up-Regulated
FAM196A	1.02411	3.18015	4.19699	5.35e-05	0.00013081	0.770691	Up-Regulated
FAM196B	1.10878	2.10164	4.83147	4.22e-06	1.2e-05	3.21406	Up-Regulated
FAM23A	-1.25222	5.51036	-5.61976	1.36e-07	4.64e-07	6.5556	Down-Regulated
FAM38B	-1.04881	7.66977	-5.94839	2.99e-08	1.11e-07	8.03441	Down-Regulated
FAM3D	-1.67711	4.78412	-4.29806	3.63e-05	9.08e-05	1.14358	Down-Regulated
FAM40B	2.08564	5.91092	8.75677	2.03e-14	1.6e-13	22.0395	Up-Regulated
FAM43A	-1.09373	7.98463	-6.3139	5.29e-09	2.16e-08	9.73039	Down-Regulated
FAM46B	-2.97611	8.11886	-17.0745	2.59e-33	4.09e-31	65.2918	Down-Regulated
FAM47E	-1.53762	6.16245	-8.34879	1.76e-13	1.24e-12	19.9	Down-Regulated
FAM49A	-1.13805	7.40378	-7.1748	7.59e-11	3.86e-10	13.9049	Down-Regulated
FAM54A	1.3421	5.20797	6.9512	2.33e-10	1.12e-09	12.7991	Up-Regulated
FAM55C	-1.03639	9.12707	-9.86732	5.25e-17	5.85e-16	27.9484	Down-Regulated
FAM57B	1.25493	1.14073	5.57718	1.64e-07	5.56e-07	6.36742	Up-Regulated
FAM64A	3.11821	4.89429	13.671	7.48e-26	2.87e-24	48.2037	Up-Regulated
FAM65A	-1.20934	10.6912	-10.2094	8.28e-18	1.01e-16	29.7829	Down-Regulated
FAM66C	-1.19364	4.01427	-8.30588	2.2e-13	1.54e-12	19.6764	Down-Regulated
FAM70A	-1.73809	6.26326	-8.01572	1.01e-12	6.49e-12	18.1717	Down-Regulated
FAM71A	-1.69128	1.18609	-5.8562	4.58e-08	1.66e-07	7.61495	Down-Regulated
FAM72A	2.05598	3.44524	9.46399	4.61e-16	4.53e-15	25.7919	Up-Regulated
FAM72B	2.0301	5.6992	9.86644	5.27e-17	5.87e-16	27.9438	Up-Regulated
FAM72D	2.08144	4.75889	9.41703	5.93e-16	5.76e-15	25.5414	Up-Regulated
FAM81A	1.40311	5.21685	6.5255	1.9e-09	8.17e-09	10.7346	Up-Regulated
FAM81B	-1.8707	5.5822	-4.67485	8.07e-06	2.2e-05	2.58889	Down-Regulated
FAM82A1	-1.05221	7.63704	-7.34889	3.14e-11	1.67e-10	14.775	Down-Regulated
FAM82A2	-1.06099	10.39	-16.0428	4.1e-31	4.05e-29	60.2561	Down-Regulated
FAM83A	6.42927	7.12807	19.7928	7.88e-39	3.76e-36	77.9079	Up-Regulated
FAM83B	2.24923	3.11387	5.95008	2.96e-08	1.1e-07	8.04211	Up-Regulated
FAM83D	2.29204	6.89753	10.4623	2.11e-18	2.8e-17	31.1413	Up-Regulated
FAM83F	2.2775	4.25008	6.60623	1.28e-09	5.63e-09	11.1217	Up-Regulated
FAM92B	-2.57258	5.18816	-6.01487	2.19e-08	8.27e-08	8.33902	Down-Regulated
FAM95B1	-1.79608	4.60604	-7.41057	2.29e-11	1.24e-10	15.0851	Down-Regulated
FANCA	1.79403	7.40115	12.5407	2.93e-23	7.6e-22	42.2618	Up-Regulated
FANCB	1.59626	3.50575	9.95866	3.21e-17	3.66e-16	28.438	Up-Regulated
FANCD2	1.51862	7.15945	11.654	3.39e-21	6.48e-20	37.5366	Up-Regulated
FANCG	1.09174	7.63674	11.7992	1.55e-21	3.15e-20	38.3132	Up-Regulated
FANCI	2.0037	8.19067	14.186	5.12e-27	2.34e-25	50.8726	Up-Regulated
FAP	2.23246	7.72467	8.2258	3.36e-13	2.28e-12	19.2597	Up-Regulated
FAR2	-1.60613	7.0112	-9.66455	1.57e-16	1.64e-15	26.8632	Down-Regulated
FAT1	1.31833	11.2485	9.23701	1.56e-15	1.42e-14	24.5827	Up-Regulated
FAT2	1.09633	4.55852	3.04528	0.00288281	0.00550243	-2.98346	Up-Regulated
FAT3	-2.82319	5.65423	-13.4741	2.1e-25	7.57e-24	47.1762	Down-Regulated
FAT4	-1.47846	8.94259	-9.05765	4.07e-15	3.51e-14	23.6303	Down-Regulated
FBLN1	-1.13246	12.3275	-6.41021	3.33e-09	1.39e-08	10.1855	Down-Regulated
FBLN5	-2.03249	10.675	-12.7033	1.24e-23	3.43e-22	43.1226	Down-Regulated
FBN2	1.16943	4.73418	3.7448	0.000283701	0.000622861	-0.815733	Up-Regulated
FBN3	-3.5427	5.08303	-10.407	2.84e-18	3.71e-17	30.8443	Down-Regulated
FBP1	-1.92124	11.507	-11.2736	2.63e-20	4.49e-19	35.4984	Down-Regulated
FBP2	-1.12433	1.17439	-5.76208	7.08e-08	2.51e-07	7.19037	Down-Regulated
FBXL19	1.03103	8.33121	9.31025	1.05e-15	9.88e-15	24.9724	Up-Regulated
FBXO15	-1.35297	4.73558	-4.48632	1.73e-05	4.53e-05	1.8551	Down-Regulated
FBXO16	1.42916	4.79339	7.95943	1.35e-12	8.56e-12	17.8815	Up-Regulated
FBXO22OS	1.02528	5.33641	10.1895	9.22e-18	1.12e-16	29.6762	Up-Regulated
FBXO32	2.34194	7.77001	13.4571	2.3e-25	8.2e-24	47.0873	Up-Regulated
FBXO41	1.22164	6.98016	6.80594	4.8e-10	2.21e-09	12.0884	Up-Regulated
FBXO43	1.77426	2.72551	10.004	2.51e-17	2.91e-16	28.6812	Up-Regulated
FCER1A	-1.86836	6.68927	-6.0319	2.02e-08	7.67e-08	8.41736	Down-Regulated
FCER1G	-1.2221	10.3381	-6.43074	3.01e-09	1.26e-08	10.2829	Down-Regulated
FCGR1A	-1.13373	7.87233	-5.30191	5.61e-07	1.77e-06	5.17117	Down-Regulated
FCGR1B	-1.19182	7.69232	-5.64206	1.23e-07	4.21e-07	6.65445	Down-Regulated
FCGR1C	-1.05167	6.17592	-4.9183	2.93e-06	8.49e-06	3.56653	Down-Regulated
FCGR3A	-1.41733	11.8566	-6.5055	2.1e-09	8.96e-09	10.639	Down-Regulated
FCGR3B	-2.0061	6.71133	-6.52542	1.9e-09	8.17e-09	10.7342	Down-Regulated
FCN1	-1.69873	8.10053	-6.58311	1.44e-09	6.26e-09	11.0106	Down-Regulated
FCN3	-5.03072	8.86203	-14.7004	3.61e-28	2.05e-26	53.5112	Down-Regulated
FCRL2	1.76987	4.20789	5.62214	1.34e-07	4.59e-07	6.56615	Up-Regulated
FCRL4	1.94237	1.65135	7.27241	4.63e-11	2.42e-10	14.3918	Up-Regulated
FCRL5	2.52919	6.11628	7.67092	6.04e-12	3.55e-11	16.4037	Up-Regulated
FCRL6	-1.33277	5.14749	-6.71395	7.56e-10	3.4e-09	11.6416	Down-Regulated
FCRLA	1.96709	4.89617	5.54582	1.89e-07	6.36e-07	6.22937	Up-Regulated
FEN1	1.51312	8.65958	13.7889	4.04e-26	1.61e-24	48.8171	Up-Regulated
FER1L4	3.40726	4.89213	11.93	7.69e-22	1.62e-20	39.0124	Up-Regulated
FERMT1	3.16833	7.38338	18.947	3.71e-37	1.36e-34	74.0846	Up-Regulated
FERMT2	-1.32764	10.5685	-12.3186	9.6e-23	2.29e-21	41.0823	Down-Regulated
FERMT3	-1.04265	9.96293	-6.11287	1.38e-08	5.35e-08	8.79125	Down-Regulated
FEZ1	-1.927	8.19786	-13.1243	1.33e-24	4.11e-23	45.3427	Down-Regulated
FEZF1	2.7331	2.05355	8.42694	1.16e-13	8.39e-13	20.3081	Up-Regulated
FGB	2.82731	3.22652	4.51976	1.51e-05	3.99e-05	1.98373	Up-Regulated
FGD2	-1.17065	8.34513	-7.24962	5.2e-11	2.7e-10	14.2779	Down-Regulated
FGD3	-1.46369	8.55659	-11.4667	9.3e-21	1.67e-19	36.5337	Down-Regulated
FGD4	-1.02035	9.49669	-9.42345	5.73e-16	5.58e-15	25.5756	Down-Regulated
FGD5	-2.10438	9.83934	-17.2391	1.17e-33	1.93e-31	66.0827	Down-Regulated
FGF10	-2.38668	1.88071	-11.7183	2.4e-21	4.68e-20	37.8809	Down-Regulated
FGF11	3.21953	5.44355	14.3398	2.31e-27	1.12e-25	51.6647	Up-Regulated
FGF14	-1.13492	7.57979	-5.0129	1.96e-06	5.79e-06	3.95513	Down-Regulated
FGF18	-1.7658	4.52106	-7.67902	5.79e-12	3.41e-11	16.4449	Down-Regulated
FGF19	1.61249	0.854618	5.78412	6.39e-08	2.28e-07	7.28944	Up-Regulated
FGF2	-2.03321	7.53848	-12.8678	5.16e-24	1.49e-22	43.9918	Down-Regulated
FGF5	1.57549	1.02329	5.49444	2.39e-07	7.91e-07	6.00415	Up-Regulated
FGFBP2	-3.62992	4.82708	-12.3927	6.46e-23	1.58e-21	41.476	Down-Regulated
FGFR2	-2.25555	9.63455	-12.1604	2.24e-22	5.06e-21	40.2409	Down-Regulated
FGFR3	-1.59837	8.87799	-5.77884	6.55e-08	2.33e-07	7.26568	Down-Regulated
FGFR4	-3.35146	8.86537	-14.3747	1.93e-27	9.45e-26	51.8441	Down-Regulated
FGG	-1.53319	9.80644	-2.40989	0.0175438	0.029098	-4.61851	Down-Regulated
FGL1	3.68868	3.60383	7.59026	9.14e-12	5.25e-11	15.9935	Up-Regulated
FGR	-2.22708	9.57181	-12.6808	1.39e-23	3.81e-22	43.0037	Down-Regulated
FHAD1	-1.33424	6.30747	-4.26472	4.13e-05	0.000102756	1.01986	Down-Regulated
FHDC1	-1.35917	9.33719	-9.86447	5.33e-17	5.93e-16	27.9332	Down-Regulated
FHL1	-3.61312	11.0199	-21.4941	4.45e-42	4.81e-39	85.3225	Down-Regulated
FHL2	2.60292	9.11773	12.7336	1.05e-23	2.95e-22	43.2827	Up-Regulated
FHL5	-3.07051	6.52013	-14.5455	8e-28	4.15e-26	52.7194	Down-Regulated
FIBIN	-1.96213	8.58702	-9.40381	6.37e-16	6.16e-15	25.4709	Down-Regulated
FIGF	-4.98642	7.51941	-13.9138	2.11e-26	8.7e-25	49.4652	Down-Regulated
FIGNL1	1.42927	7.63312	12.2039	1.77e-22	4.07e-21	40.4721	Up-Regulated
FILIP1	-1.78667	8.21976	-8.78079	1.78e-14	1.42e-13	22.1661	Down-Regulated
FITM1	-1.13459	2.75428	-7.89144	1.93e-12	1.2e-11	17.5317	Down-Regulated
FKBP10	1.31899	10.2077	6.44291	2.84e-09	1.19e-08	10.3408	Up-Regulated
FKBP11	1.66538	8.87729	11.4362	1.1e-20	1.95e-19	36.3706	Up-Regulated
FKBP1B	-1.55269	6.94268	-9.67604	1.47e-16	1.55e-15	26.9246	Down-Regulated
FLAD1	1.30798	9.37317	13.6913	6.73e-26	2.61e-24	48.3095	Up-Regulated
FLI1	-1.64484	9.55856	-12.5341	3.04e-23	7.86e-22	42.2268	Down-Regulated
FLJ11235	-1.2513	4.39117	-9.54193	3.03e-16	3.05e-15	26.2079	Down-Regulated
FLJ22536	1.03209	4.0379	4.67164	8.17e-06	2.23e-05	2.57625	Up-Regulated
FLJ26850	-1.65523	1.98965	-5.99673	2.38e-08	8.96e-08	8.25573	Down-Regulated
FLJ34503	-1.68037	1.47801	-8.69273	2.85e-14	2.21e-13	21.7022	Down-Regulated
FLJ36777	-1.20122	2.50265	-7.44926	1.88e-11	1.04e-10	15.2801	Down-Regulated
FLJ37543	-1.31488	1.18304	-9.94267	3.5e-17	3.97e-16	28.3522	Down-Regulated
FLJ40330	1.75863	4.55753	5.56832	1.71e-07	5.77e-07	6.32837	Up-Regulated
FLJ42875	-2.22708	4.56118	-9.16794	2.26e-15	2.01e-14	24.2156	Down-Regulated
FLRT3	-2.54348	10.295	-9.76783	8.98e-17	9.63e-16	27.4157	Down-Regulated
FLT4	-1.35752	9.15539	-9.76623	9.06e-17	9.71e-16	27.4071	Down-Regulated
FLVCR1	1.10833	6.89935	8.71457	2.54e-14	1.98e-13	21.8173	Up-Regulated
FLVCR2	-1.28373	9.12287	-7.96611	1.31e-12	8.28e-12	17.9159	Down-Regulated
FMO1	1.56738	4.94217	5.60501	1.45e-07	4.94e-07	6.4903	Up-Regulated
FMO2	-3.33282	10.837	-17.2105	1.34e-33	2.17e-31	65.9455	Down-Regulated
FMO3	-1.21059	8.24364	-6.6106	1.26e-09	5.51e-09	11.1427	Down-Regulated
FNDC1	2.74139	8.12542	8.89757	9.58e-15	7.87e-14	22.7827	Up-Regulated
FNDC4	1.62213	6.7328	7.94861	1.43e-12	9.01e-12	17.8258	Up-Regulated
FOLR1	-2.32618	11.2158	-6.24098	7.5e-09	3.01e-08	9.38799	Down-Regulated
FOLR3	-3.94024	3.83147	-15.0736	5.37e-29	3.49e-27	55.4075	Down-Regulated
FOS	-1.65967	12.9898	-5.94175	3.08e-08	1.14e-07	8.00409	Down-Regulated
FOSB	-3.68831	11.1621	-8.40289	1.32e-13	9.45e-13	20.1824	Down-Regulated
FOXA1	1.054	9.77976	7.1198	1e-10	5.01e-10	13.6317	Up-Regulated
FOXA2	-1.80851	8.93084	-5.96739	2.73e-08	1.02e-07	8.12127	Down-Regulated
FOXA3	1.7917	5.01031	5.97156	2.68e-08	1e-07	8.14039	Up-Regulated
FOXB1	1.54597	0.995947	5.89072	3.91e-08	1.43e-07	7.77159	Up-Regulated
FOXD3	1.48097	1.06879	6.44386	2.83e-09	1.19e-08	10.3453	Up-Regulated
FOXE1	1.79103	2.27324	4.54716	1.35e-05	3.61e-05	2.0896	Up-Regulated
FOXF1	-2.56758	8.55402	-16.7405	1.32e-32	1.7e-30	63.6761	Down-Regulated
FOXF2	-1.36129	7.73653	-7.73076	4.43e-12	2.65e-11	16.7088	Down-Regulated
FOXI3	1.62121	0.876804	6.47395	2.44e-09	1.04e-08	10.4885	Up-Regulated
FOXM1	3.13439	7.62828	14.1318	6.78e-27	3.03e-25	50.5928	Up-Regulated
FOXP3	2.16971	5.14102	9.7182	1.17e-16	1.24e-15	27.1501	Up-Regulated
FPR1	-1.52359	8.89314	-6.21017	8.68e-09	3.46e-08	9.24394	Down-Regulated
FPR2	-2.82678	6.98348	-9.37302	7.52e-16	7.22e-15	25.3068	Down-Regulated
FRAS1	-2.14114	8.72992	-9.5229	3.36e-16	3.36e-15	26.1063	Down-Regulated
FREM1	-1.83938	5.87551	-7.68191	5.7e-12	3.36e-11	16.4596	Down-Regulated
FREM2	-2.22667	8.36892	-8.25318	2.91e-13	1.99e-12	19.4021	Down-Regulated
FRK	1.24898	6.52762	10.5051	1.67e-18	2.25e-17	31.3714	Up-Regulated
FRMD3	-2.76651	5.39176	-14.7709	2.52e-28	1.48e-26	53.8707	Down-Regulated
FRMD4A	-1.31965	9.15601	-12.4474	4.83e-23	1.21e-21	41.7664	Down-Regulated
FRMD4B	-1.1256	9.716	-11.1846	4.26e-20	7.02e-19	35.0211	Down-Regulated
FRMD5	3.47128	3.77657	12.5631	2.6e-23	6.79e-22	42.3803	Up-Regulated
FRMPD1	-1.83044	2.43643	-7.65132	6.68e-12	3.9e-11	16.3038	Down-Regulated
FRMPD2	-1.36062	2.49762	-3.72404	0.000305334	0.00066736	-0.885212	Down-Regulated
FRMPD4	-1.06413	1.36835	-4.89892	3.18e-06	9.16e-06	3.4875	Down-Regulated
FRY	-1.67224	9.90139	-13.4927	1.91e-25	6.92e-24	47.2734	Down-Regulated
FSCN1	1.03327	10.6254	5.1332	1.17e-06	3.55e-06	4.45614	Up-Regulated
FSD1	1.57843	1.91379	6.00876	2.25e-08	8.49e-08	8.31096	Up-Regulated
FSTL3	-1.08596	10.304	-6.3639	4.16e-09	1.72e-08	9.96625	Down-Regulated
FUT2	2.86077	6.8451	12.5861	2.3e-23	6.07e-22	42.5024	Up-Regulated
FUT3	1.84896	8.0136	9.72698	1.12e-16	1.19e-15	27.1971	Up-Regulated
FUT6	2.28238	5.19923	8.25669	2.86e-13	1.96e-12	19.4203	Up-Regulated
FUT8	1.34621	9.41561	11.7724	1.79e-21	3.58e-20	38.1702	Up-Regulated
FUT9	3.68668	2.27786	8.41057	1.27e-13	9.11e-13	20.2225	Up-Regulated
FXYD1	-3.36678	6.57709	-14.394	1.75e-27	8.62e-26	51.9429	Down-Regulated
FXYD3	-1.3772	10.4429	-4.68781	7.65e-06	2.1e-05	2.6401	Down-Regulated
FXYD4	-1.3284	2.51508	-3.93692	0.000141852	0.000326482	-0.158479	Down-Regulated
FXYD6	-1.78934	10.0236	-13.6228	9.63e-26	3.65e-24	47.9523	Down-Regulated
FZD4	-1.56037	10.2026	-10.5654	1.21e-18	1.66e-17	31.6951	Down-Regulated
G6PC2	-1.01279	0.795863	-6.07044	1.68e-08	6.46e-08	8.59499	Down-Regulated
GAB1	-1.37643	9.59647	-15.6946	2.33e-30	1.98e-28	58.527	Down-Regulated
GAB2	-1.11183	10.3218	-9.28723	1.19e-15	1.11e-14	24.8499	Down-Regulated
GAB3	-1.20248	7.5445	-8.6858	2.96e-14	2.29e-13	21.6658	Down-Regulated
GABARAPL1	-1.19202	10.9304	-10.8371	2.78e-19	4.11e-18	33.1552	Down-Regulated
GABBR2	1.37303	4.26384	3.55978	0.000540839	0.00114433	-1.42427	Up-Regulated
GABRA3	1.53712	1.10673	4.69042	7.57e-06	2.08e-05	2.65042	Up-Regulated
GABRA4	-1.04518	0.819911	-5.71576	8.75e-08	3.06e-07	6.98282	Down-Regulated
GABRB2	-1.01329	5.1156	-3.90564	0.000159049	0.00036301	-0.26721	Down-Regulated
GABRD	1.20672	4.12807	5.08535	1.44e-06	4.32e-06	4.25596	Up-Regulated
GAD1	2.82771	3.0477	9.38283	7.13e-16	6.86e-15	25.3591	Up-Regulated
GADD45B	-1.37136	10.8647	-7.29237	4.19e-11	2.2e-10	14.4917	Down-Regulated
GAL	2.89456	2.04051	8.35779	1.68e-13	1.19e-12	19.947	Up-Regulated
GALNT13	-2.78423	6.03327	-9.4193	5.86e-16	5.7e-15	25.5535	Down-Regulated
GALNT14	3.524	6.23596	12.0945	3.18e-22	7.05e-21	39.8895	Up-Regulated
GALNT4	1.02266	9.03791	6.20675	8.83e-09	3.51e-08	9.22796	Up-Regulated
GALNT6	1.40135	9.23014	6.79038	5.18e-10	2.38e-09	12.0126	Up-Regulated
GALNT7	1.6685	9.88894	14.6346	5.06e-28	2.76e-26	53.1753	Up-Regulated
GALNTL1	-1.92265	5.50761	-8.31559	2.09e-13	1.47e-12	19.727	Down-Regulated
GALNTL4	-1.71159	9.57739	-15.0708	5.44e-29	3.53e-27	55.3934	Down-Regulated
GANC	-1.08074	8.96774	-12.46	4.51e-23	1.14e-21	41.8333	Down-Regulated
GAP43	1.61099	2.29787	5.67919	1.03e-07	3.59e-07	6.81958	Up-Regulated
GAPDH	1.57296	14.7729	13.314	4.88e-25	1.65e-23	46.3385	Up-Regulated
GAPT	-1.04859	5.93515	-5.00977	1.99e-06	5.87e-06	3.9422	Down-Regulated
GARS	1.04006	10.8651	12.3071	1.02e-22	2.43e-21	41.0213	Up-Regulated
GAS2L2	-2.20139	5.01596	-5.75911	7.17e-08	2.54e-07	7.17703	Down-Regulated
GAS6	-1.87666	11.7779	-12.8963	4.43e-24	1.29e-22	44.1423	Down-Regulated
GATA1	-1.9263	2.44404	-12.0518	4e-22	8.71e-21	39.662	Down-Regulated
GATA2	-2.03676	8.64646	-11.6206	4.06e-21	7.69e-20	37.3579	Down-Regulated
GATA5	-1.81123	4.5174	-7.76707	3.67e-12	2.21e-11	16.8943	Down-Regulated
GATA6	-2.22299	8.90711	-13.1672	1.06e-24	3.34e-23	45.5684	Down-Regulated
GBA3	-2.32847	2.45744	-10.56	1.24e-18	1.7e-17	31.6661	Down-Regulated
GBP4	-1.5278	10.7148	-7.66149	6.34e-12	3.71e-11	16.3556	Down-Regulated
GBP7	-1.5448	1.57931	-8.58475	5.05e-14	3.79e-13	21.1347	Down-Regulated
GCAT	1.00512	7.50812	6.89047	3.16e-10	1.49e-09	12.5012	Up-Regulated
GCHFR	-1.01379	9.13543	-6.95143	2.33e-10	1.12e-09	12.8003	Down-Regulated
GCKR	1.13896	1.16275	4.65534	8.74e-06	2.38e-05	2.51201	Up-Regulated
GCLC	1.42949	9.60871	6.28362	6.12e-09	2.48e-08	9.58795	Up-Regulated
GCM1	1.27566	1.41665	5.45277	2.88e-07	9.43e-07	5.82236	Up-Regulated
GCNT3	3.77247	6.22461	10.5193	1.55e-18	2.09e-17	31.4477	Up-Regulated
GCNT4	-1.40358	5.456	-7.12462	9.78e-11	4.91e-10	13.6556	Down-Regulated
GCOM1	-3.49881	8.51088	-17.2033	1.39e-33	2.23e-31	65.9109	Down-Regulated
GCSH	1.41657	2.7302	7.13684	9.19e-11	4.63e-10	13.7162	Up-Regulated
GDF10	-4.02296	7.12796	-16.5993	2.63e-32	3.19e-30	62.9892	Down-Regulated
GFAP	1.75725	2.04676	7.06333	1.33e-10	6.56e-10	13.352	Up-Regulated
GFI1B	-1.7807	2.28483	-8.46294	9.63e-14	7e-13	20.4964	Down-Regulated
GFOD1	-1.63652	5.86093	-11.9838	5.76e-22	1.23e-20	39.2992	Down-Regulated
GFPT1	1.03565	11.3589	11.7336	2.21e-21	4.33e-20	37.9625	Up-Regulated
GFRA1	-2.25088	6.9782	-7.71031	4.93e-12	2.93e-11	16.6044	Down-Regulated
GFRA2	-1.8022	5.29733	-8.90047	9.43e-15	7.75e-14	22.7981	Down-Regulated
GGA2	-1.01061	11.5139	-15.1199	4.24e-29	2.82e-27	55.6418	Down-Regulated
GGCT	1.37304	9.49426	12.0175	4.81e-22	1.04e-20	39.4791	Up-Regulated
GGT1	-1.00114	9.13067	-6.03255	2.01e-08	7.64e-08	8.42032	Down-Regulated
GGT3P	-1.28612	6.06838	-6.55301	1.66e-09	7.21e-09	10.8663	Down-Regulated
GGT6	-1.6252	7.31536	-4.9687	2.37e-06	6.93e-06	3.77296	Down-Regulated
GGTA1	-1.50229	8.0323	-9.261	1.37e-15	1.26e-14	24.7103	Down-Regulated
GGTLC1	-3.43457	7.67892	-10.3124	4.74e-18	6.04e-17	30.3361	Down-Regulated
GGTLC2	-1.60655	6.89399	-9.29362	1.15e-15	1.07e-14	24.8839	Down-Regulated
GHR	-2.28697	6.34964	-13.7278	5.56e-26	2.19e-24	48.4991	Down-Regulated
GIMAP1	-1.80753	7.61571	-12.2138	1.68e-22	3.86e-21	40.5252	Down-Regulated
GIMAP4	-1.48003	10.0417	-10.3007	5.05e-18	6.39e-17	30.2736	Down-Regulated
GIMAP5	-1.96802	9.6452	-12.4784	4.09e-23	1.04e-21	41.931	Down-Regulated
GIMAP6	-2.04699	9.87037	-14.12	7.21e-27	3.2e-25	50.5319	Down-Regulated
GIMAP7	-1.87684	8.88322	-12.6797	1.4e-23	3.83e-22	42.9978	Down-Regulated
GIMAP8	-2.41061	9.55006	-16.658	1.97e-32	2.44e-30	63.2751	Down-Regulated
GINS1	2.73071	6.48878	15.7739	1.57e-30	1.38e-28	58.9222	Up-Regulated
GINS2	2.75623	6.12438	15.9234	7.43e-31	7.16e-29	59.6649	Up-Regulated
GINS4	2.32712	6.16589	12.4655	4.38e-23	1.11e-21	41.8627	Up-Regulated
GIPC2	-2.33542	6.21735	-10.8214	3.03e-19	4.44e-18	33.0705	Down-Regulated
GIPC3	-1.01215	7.24087	-7.06684	1.31e-10	6.45e-10	13.3693	Down-Regulated
GJA1	-1.08115	11.7983	-5.99326	2.42e-08	9.09e-08	8.23982	Down-Regulated
GJA4	-1.36902	8.04609	-9.87683	4.99e-17	5.57e-16	27.9994	Down-Regulated
GJA5	-1.25535	10.153	-6.90076	3e-10	1.42e-09	12.5516	Down-Regulated
GJA9	1.21205	2.67975	7.8731	2.12e-12	1.31e-11	17.4376	Up-Regulated
GJB2	4.05608	6.73119	14.0259	1.18e-26	5.03e-25	50.0456	Up-Regulated
GJB3	2.2173	5.66046	6.02583	2.08e-08	7.88e-08	8.38941	Up-Regulated
GJB4	1.40982	2.45019	3.9948	0.000114601	0.000267267	0.0444539	Up-Regulated
GJB5	1.40114	3.46723	3.58329	0.000498888	0.0010606	-1.34831	Up-Regulated
GJB6	2.51892	2.42181	7.35204	3.09e-11	1.65e-10	14.7908	Up-Regulated
GJC2	-1.64382	5.62211	-9.56324	2.7e-16	2.73e-15	26.3217	Down-Regulated
GKN2	-5.4565	7.21243	-12.3053	1.03e-22	2.45e-21	41.0117	Down-Regulated
GLB1L2	1.20284	8.64646	6.06495	1.73e-08	6.61e-08	8.56964	Up-Regulated
GLB1L3	2.92012	3.20045	6.00776	2.26e-08	8.52e-08	8.30638	Up-Regulated
GLDC	1.38866	3.95643	5.12743	1.2e-06	3.64e-06	4.43196	Up-Regulated
GLDN	-3.11536	7.69016	-12.7185	1.14e-23	3.19e-22	43.203	Down-Regulated
GLIPR1L2	-1.19088	3.80449	-6.41158	3.3e-09	1.38e-08	10.192	Down-Regulated
GLIPR2	-2.13824	10.5056	-13.8115	3.59e-26	1.45e-24	48.9343	Down-Regulated
GLP2R	-1.06808	1.2838	-4.72597	6.54e-06	1.81e-05	2.79143	Down-Regulated
GLRA3	1.48159	1.41318	5.88902	3.94e-08	1.44e-07	7.76387	Up-Regulated
GLT1D1	-1.13996	4.90749	-5.06321	1.58e-06	4.73e-06	4.16374	Down-Regulated
GLT25D2	-2.14495	6.14849	-8.56948	5.48e-14	4.09e-13	21.0546	Down-Regulated
GLYATL2	1.23684	1.35955	3.5195	0.000620556	0.00130173	-1.55349	Up-Regulated
GMDS	1.32327	7.8965	10.5902	1.06e-18	1.46e-17	31.8285	Up-Regulated
GMFG	-1.54029	9.3366	-10.0806	1.66e-17	1.96e-16	29.0917	Down-Regulated
GMNN	1.24927	7.75755	11.4098	1.26e-20	2.23e-19	36.2289	Up-Regulated
GNAQ	-1.09109	11.2691	-14.0715	9.27e-27	4.01e-25	50.2814	Down-Regulated
GNAZ	-1.32385	6.13736	-4.9409	2.67e-06	7.74e-06	3.65893	Down-Regulated
GNB3	1.32465	3.24298	6.53951	1.78e-09	7.66e-09	10.8016	Up-Regulated
GNG11	-1.95479	10.1007	-11.0349	9.55e-20	1.51e-18	34.2177	Down-Regulated
GNG4	3.15904	4.57349	8.06293	7.88e-13	5.15e-12	18.4156	Up-Regulated
GNG7	-1.31565	7.70435	-8.33065	1.94e-13	1.36e-12	19.8054	Down-Regulated
GNGT1	1.53889	0.858589	6.62033	1.2e-09	5.27e-09	11.1896	Up-Regulated
GNGT2	-1.13456	5.82573	-7.45224	1.85e-11	1.02e-10	15.2951	Down-Regulated
GNLY	-1.145	7.45332	-3.67802	0.000359008	0.000777554	-1.03817	Down-Regulated
GNMT	-1.84244	3.61101	-8.16216	4.69e-13	3.13e-12	18.9293	Down-Regulated
GNPNAT1	1.38796	9.47866	14.668	4.26e-28	2.36e-26	53.3458	Up-Regulated
GOLGA7B	2.25415	7.019	10.2333	7.28e-18	8.98e-17	29.9111	Up-Regulated
GOLM1	2.62718	11.2548	18.9508	3.65e-37	1.36e-34	74.1018	Up-Regulated
GP6	-1.38925	2.20498	-7.23544	5.59e-11	2.88e-10	14.2071	Down-Regulated
GP9	-2.04347	1.62524	-10.345	3.98e-18	5.11e-17	30.511	Down-Regulated
GPA33	-3.98108	6.20155	-15.0856	5.05e-29	3.31e-27	55.4683	Down-Regulated
GPBAR1	-2.09812	5.03015	-12.5978	2.17e-23	5.72e-22	42.564	Down-Regulated
GPC2	2.26386	3.18827	8.08393	7.06e-13	4.64e-12	18.5241	Up-Regulated
GPC3	-2.65378	9.66656	-12.1343	2.57e-22	5.75e-21	40.1017	Down-Regulated
GPC5	-2.76711	4.6498	-10.1488	1.15e-17	1.38e-16	29.4578	Down-Regulated
GPD1	-5.07947	7.75288	-17.4841	3.6e-34	6.42e-32	67.2536	Down-Regulated
GPD1L	-1.23984	10.6648	-9.94529	3.45e-17	3.92e-16	28.3663	Down-Regulated
GPER	-2.41354	6.68127	-11.6742	3.04e-21	5.83e-20	37.6451	Down-Regulated
GPI	1.13822	12.1929	13.3414	4.22e-25	1.43e-23	46.4821	Up-Regulated
GPIHBP1	-4.1355	7.71403	-17.3974	5.45e-34	9.49e-32	66.8403	Down-Regulated
GPM6A	-5.31635	7.55775	-20.621	1.98e-40	1.62e-37	81.563	Down-Regulated
GPM6B	-2.2868	7.89084	-14.1754	5.41e-27	2.46e-25	50.818	Down-Regulated
GPR109A	-2.17982	8.12109	-9.99928	2.58e-17	2.98e-16	28.6557	Down-Regulated
GPR109B	-1.95064	6.3768	-8.45729	9.92e-14	7.19e-13	20.4668	Down-Regulated
GPR110	1.48161	8.14166	3.84766	0.000196312	0.000441626	-0.466997	Up-Regulated
GPR112	-1.39135	1.02448	-8.48753	8.46e-14	6.18e-13	20.6251	Down-Regulated
GPR115	3.79558	3.87936	11.2297	3.34e-20	5.59e-19	35.2629	Up-Regulated
GPR116	-1.71106	12.551	-8.24398	3.05e-13	2.09e-12	19.3542	Down-Regulated
GPR120	-2.89589	4.75167	-11.9204	8.1e-22	1.7e-20	38.9607	Down-Regulated
GPR123	-2.41043	2.38118	-8.36821	1.59e-13	1.13e-12	20.0013	Down-Regulated
GPR126	-1.08297	9.79124	-5.76877	6.86e-08	2.44e-07	7.2204	Down-Regulated
GPR133	-2.53951	9.46573	-10.8121	3.18e-19	4.65e-18	33.0209	Down-Regulated
GPR146	-2.31852	7.81035	-17.6526	1.61e-34	3.05e-32	68.0548	Down-Regulated
GPR162	-1.5421	6.70668	-7.52075	1.31e-11	7.36e-11	15.6412	Down-Regulated
GPR17	-2.71938	3.6194	-13.8574	2.83e-26	1.15e-24	49.1729	Down-Regulated
GPR172A	1.30097	10.0427	13.0266	2.22e-24	6.81e-23	44.8289	Up-Regulated
GPR182	-1.15341	2.69225	-7.65847	6.44e-12	3.77e-11	16.3403	Down-Regulated
GPR19	1.83069	3.13405	9.53327	3.18e-16	3.19e-15	26.1616	Up-Regulated
GPR20	-1.28541	2.954	-8.23923	3.13e-13	2.14e-12	19.3295	Down-Regulated
GPR35	1.13443	5.43686	4.79657	4.88e-06	1.37e-05	3.07356	Up-Regulated
GPR37	2.04682	5.4157	7.79191	3.23e-12	1.96e-11	17.0214	Up-Regulated
GPR37L1	1.07492	2.04285	5.02716	1.85e-06	5.47e-06	4.01412	Up-Regulated
GPR4	-1.30579	7.82077	-8.41742	1.22e-13	8.8e-13	20.2583	Down-Regulated
GPR44	-1.38338	3.624	-7.26878	4.72e-11	2.46e-10	14.3737	Down-Regulated
GPR56	1.13964	10.972	6.88094	3.31e-10	1.56e-09	12.4546	Up-Regulated
GPR65	-1.25691	7.27375	-6.89022	3.16e-10	1.49e-09	12.5	Down-Regulated
GPR81	1.57545	4.6017	4.51442	1.54e-05	4.07e-05	1.96314	Up-Regulated
GPR82	1.01167	3.37763	4.56263	1.27e-05	3.4e-05	2.1496	Up-Regulated
GPR84	1.77401	4.85209	7.03798	1.51e-10	7.4e-10	13.2267	Up-Regulated
GPR87	4.10091	4.74414	9.42161	5.79e-16	5.63e-15	25.5658	Up-Regulated
GPR88	1.57054	2.63499	6.4755	2.42e-09	1.03e-08	10.4959	Up-Regulated
GPR89C	1.10682	5.39806	6.38467	3.76e-09	1.56e-08	10.0645	Up-Regulated
GPR98	-1.45125	7.67304	-5.12567	1.21e-06	3.66e-06	4.42459	Down-Regulated
GPRASP1	-1.16629	7.31902	-7.51888	1.32e-11	7.42e-11	15.6318	Down-Regulated
GPRC5A	-1.72747	13.0287	-8.16827	4.54e-13	3.04e-12	18.961	Down-Regulated
GPRC5D	-1.13529	4.01634	-6.20035	9.1e-09	3.61e-08	9.19809	Down-Regulated
GPRIN1	2.69438	6.41054	15.6618	2.75e-30	2.29e-28	58.3636	Up-Regulated
GPRIN2	-3.06926	8.84122	-12.1764	2.05e-22	4.69e-21	40.3256	Down-Regulated
GPT2	2.67919	8.40124	18.2082	1.16e-35	3.04e-33	70.6694	Up-Regulated
GPX2	2.49685	5.79186	4.35283	2.93e-05	7.43e-05	1.34835	Up-Regulated
GPX3	-2.41368	13.0262	-13.2675	6.23e-25	2.05e-23	46.0947	Down-Regulated
GPX8	1.34896	8.68811	7.68703	5.55e-12	3.28e-11	16.4857	Up-Regulated
GRAMD2	-2.19778	8.8309	-10.1649	1.05e-17	1.28e-16	29.5441	Down-Regulated
GRAP2	-1.07449	6.05521	-5.70297	9.28e-08	3.24e-07	6.92564	Down-Regulated
GRASP	-2.46292	8.10369	-15.3052	1.66e-29	1.17e-27	56.5763	Down-Regulated
GREB1	1.90185	5.62819	9.01846	5.02e-15	4.29e-14	23.4225	Up-Regulated
GREB1L	2.65209	2.96391	9.91471	4.07e-17	4.59e-16	28.2024	Up-Regulated
GREM1	4.82386	7.29346	11.7209	2.37e-21	4.63e-20	37.8948	Up-Regulated
GREM2	-1.60015	5.4275	-5.25981	6.75e-07	2.11e-06	4.99143	Down-Regulated
GRHL1	1.35936	7.83828	7.69133	5.43e-12	3.21e-11	16.5076	Up-Regulated
GRHL3	3.41753	3.38251	12.3764	7.05e-23	1.71e-21	41.3898	Up-Regulated
GRIA1	-4.98837	6.14652	-17.5504	2.62e-34	4.8e-32	67.5691	Down-Regulated
GRID1	-1.69922	5.21299	-9.73481	1.07e-16	1.14e-15	27.239	Down-Regulated
GRIK2	2.09899	3.15087	6.60851	1.27e-09	5.57e-09	11.1327	Up-Regulated
GRIK4	-3.02836	3.69076	-15.9106	7.92e-31	7.6e-29	59.6013	Down-Regulated
GRIN1	1.85876	3.04893	7.14336	8.9e-11	4.49e-10	13.7486	Up-Regulated
GRIN2D	1.47491	5.14587	5.66619	1.1e-07	3.8e-07	6.76171	Up-Regulated
GRIN3B	-1.22415	4.15832	-2.99601	0.0033513	0.00633129	-3.12206	Down-Regulated
GRIP1	1.45197	5.01765	6.80116	4.92e-10	2.26e-09	12.0651	Up-Regulated
GRK5	-2.63532	9.61908	-22.7376	2.35e-44	5.36e-41	90.5142	Down-Regulated
GRM3	-1.45973	1.75949	-8.38082	1.49e-13	1.06e-12	20.0671	Down-Regulated
GRM4	1.36138	1.71406	4.21778	4.94e-05	0.000121489	0.846879	Up-Regulated
GRM5	1.17691	3.21902	3.01557	0.00315752	0.00598945	-3.06728	Up-Regulated
GRP	-1.27623	4.27192	-3.12907	0.00222271	0.00431265	-2.74335	Down-Regulated
GRRP1	-2.23143	5.57387	-14.2432	3.81e-27	1.78e-25	51.1673	Down-Regulated
GSDMB	1.32197	6.78179	6.55128	1.68e-09	7.27e-09	10.858	Up-Regulated
GSDMC	1.81158	4.87247	6.1951	9.33e-09	3.7e-08	9.1736	Up-Regulated
GSG1L	-1.97514	1.65699	-10.6572	7.35e-19	1.03e-17	32.1885	Down-Regulated
GSG2	1.67839	4.72712	9.01667	5.07e-15	4.32e-14	23.413	Up-Regulated
GSTA1	-1.22943	6.98812	-2.36618	0.0196459	0.0323026	-4.71849	Down-Regulated
GSTA2	-1.33844	4.41503	-2.56269	0.0116784	0.0200718	-4.2561	Down-Regulated
GSTA3	-2.79302	2.53706	-8.40744	1.29e-13	9.24e-13	20.2062	Down-Regulated
GSTA4	-1.32355	9.08022	-8.55551	5.9e-14	4.39e-13	20.9813	Down-Regulated
GSTM5	-2.36396	7.13622	-12.3511	8.07e-23	1.95e-21	41.2554	Down-Regulated
GTSE1	3.1301	5.77892	14.2718	3.28e-27	1.55e-25	51.3147	Up-Regulated
GUCA1A	1.9056	1.22138	7.81625	2.85e-12	1.74e-11	17.146	Up-Regulated
GUCA2A	-2.22881	1.90991	-8.98437	6.03e-15	5.07e-14	23.2419	Down-Regulated
GUCY1A2	-1.412	5.44716	-8.02553	9.58e-13	6.19e-12	18.2224	Down-Regulated
GUCY1B2	2.00528	3.17572	6.02365	2.1e-08	7.95e-08	8.37937	Up-Regulated
GVIN1	-1.34168	7.50485	-6.56304	1.58e-09	6.87e-09	10.9143	Down-Regulated
GYG2	2.21706	6.61263	10.9708	1.35e-19	2.08e-18	33.8731	Up-Regulated
GYLTL1B	1.7457	7.6737	9.22438	1.67e-15	1.52e-14	24.5156	Up-Regulated
GYPC	-1.69097	9.44784	-12.937	3.57e-24	1.06e-22	44.3568	Down-Regulated
GYPE	-3.51809	4.72131	-20.159	1.53e-39	8.48e-37	79.535	Down-Regulated
GZMH	-1.20722	6.30748	-5.40524	3.55e-07	1.15e-06	5.61602	Down-Regulated
GZMM	-1.19463	5.53646	-5.59289	1.53e-07	5.2e-07	6.43676	Down-Regulated
H2AFX	1.10126	9.08886	9.49715	3.86e-16	3.83e-15	25.9688	Up-Regulated
HABP2	1.15733	6.39903	2.59058	0.0108217	0.0187106	-4.18779	Up-Regulated
HAL	1.46679	4.54782	4.36484	2.79e-05	7.11e-05	1.39347	Up-Regulated
HAMP	1.64333	3.12181	5.23231	7.62e-07	2.37e-06	4.87446	Up-Regulated
HAPLN3	1.14705	7.71823	5.89636	3.8e-08	1.39e-07	7.79725	Up-Regulated
HAS1	-1.77129	4.05853	-3.86597	0.000183731	0.000415326	-0.404165	Down-Regulated
HAVCR1	2.44695	1.68332	6.89328	3.11e-10	1.47e-09	12.515	Up-Regulated
HBA1	-4.97466	9.05556	-10.8823	2.18e-19	3.26e-18	33.3976	Down-Regulated
HBA2	-4.09316	11.0238	-11.7822	1.7e-21	3.41e-20	38.2227	Down-Regulated
HBB	-4.02849	11.4244	-10.9008	1.97e-19	2.96e-18	33.4974	Down-Regulated
HBD	-1.05888	1.64092	-4.36691	2.77e-05	7.06e-05	1.40129	Down-Regulated
HBEGF	-2.36112	10.1699	-12.6045	2.09e-23	5.55e-22	42.5996	Down-Regulated
HBG1	-2.53213	2.54008	-7.30852	3.86e-11	2.03e-10	14.5726	Down-Regulated
HBG2	-2.28666	2.10628	-6.71617	7.48e-10	3.37e-09	11.6523	Down-Regulated
HBM	-1.25863	0.792076	-8.99954	5.56e-15	4.7e-14	23.3223	Down-Regulated
HCK	-1.3606	10.0307	-6.7415	6.6e-10	2.99e-09	11.7751	Down-Regulated
HCN2	1.55048	3.13853	6.65212	1.02e-09	4.55e-09	11.3427	Up-Regulated
HCN3	1.17608	5.71699	7.95386	1.39e-12	8.78e-12	17.8528	Up-Regulated
HCST	-1.13642	8.12459	-6.88278	3.28e-10	1.54e-09	12.4636	Down-Regulated
HDC	-1.69413	5.8015	-7.09281	1.15e-10	5.7e-10	13.4979	Down-Regulated
HDGF	1.01259	12.5192	11.8449	1.21e-21	2.49e-20	38.5576	Up-Regulated
HEATR1	1.04169	9.60901	14.0924	8.32e-27	3.66e-25	50.3893	Up-Regulated
HECW1	2.20494	3.22287	9.26027	1.38e-15	1.27e-14	24.7065	Up-Regulated
HECW2	-1.26376	8.8102	-7.7763	3.5e-12	2.12e-11	16.9415	Down-Regulated
HEG1	-1.88243	11.7016	-12.142	2.47e-22	5.53e-21	40.1426	Down-Regulated
HELLS	2.76189	5.43045	14.9794	8.67e-29	5.48e-27	54.9303	Up-Regulated
HELT	-1.61907	1.14303	-8.653	3.52e-14	2.7e-13	21.4933	Down-Regulated
HEMGN	-1.4171	1.67262	-7.96821	1.29e-12	8.2e-12	17.9267	Down-Regulated
HEPHL1	1.11357	1.06587	4.88332	3.4e-06	9.75e-06	3.42402	Up-Regulated
HES6	1.65321	6.86829	7.03542	1.53e-10	7.49e-10	13.214	Up-Regulated
HEY1	-1.27514	8.41303	-7.65489	6.56e-12	3.84e-11	16.322	Down-Regulated
HEY2	-1.20881	5.78126	-6.56701	1.55e-09	6.74e-09	10.9333	Down-Regulated
HGD	1.90499	5.27972	4.69867	7.32e-06	2.01e-05	2.68309	Up-Regulated
HHIP	-4.04754	7.97194	-12.1757	2.06e-22	4.7e-21	40.3221	Down-Regulated
HHIPL2	4.50377	3.40254	10.1026	1.47e-17	1.75e-16	29.21	Up-Regulated
HIF3A	-2.44301	7.80676	-8.17417	4.4e-13	2.95e-12	18.9916	Down-Regulated
HIGD1B	-2.85722	6.24629	-16.7124	1.51e-32	1.92e-30	63.5397	Down-Regulated
HIST1H1B	1.04796	0.789765	6.07976	1.61e-08	6.2e-08	8.63804	Up-Regulated
HIST1H1D	1.55889	1.20485	7.85455	2.33e-12	1.44e-11	17.3423	Up-Regulated
HIST1H1E	1.30729	1.71401	7.10645	1.07e-10	5.34e-10	13.5655	Up-Regulated
HIST1H2AE	1.78215	2.72134	6.34382	4.58e-09	1.88e-08	9.87143	Up-Regulated
HIST1H2AG	1.2146	1.4491	6.42437	3.11e-09	1.3e-08	10.2527	Up-Regulated
HIST1H2AM	1.99404	1.55289	11.6401	3.65e-21	6.97e-20	37.4624	Up-Regulated
HIST1H2BC	1.17085	5.9613	6.31703	5.21e-09	2.13e-08	9.74511	Up-Regulated
HIST1H2BD	2.04371	7.14105	12.1854	1.96e-22	4.48e-21	40.374	Up-Regulated
HIST1H2BE	1.01026	3.01778	6.80727	4.77e-10	2.2e-09	12.0949	Up-Regulated
HIST1H2BG	1.99279	2.24644	6.92958	2.6e-10	1.24e-09	12.693	Up-Regulated
HIST1H2BH	1.23444	1.22341	5.51216	2.2e-07	7.34e-07	6.08167	Up-Regulated
HIST1H2BN	1.21519	2.77685	7.43671	2.01e-11	1.1e-10	15.2168	Up-Regulated
HIST1H2BO	1.05089	0.880691	7.01496	1.7e-10	8.25e-10	13.113	Up-Regulated
HIST1H3D	1.80543	2.33701	7.1582	8.25e-11	4.18e-10	13.8224	Up-Regulated
HIST1H3H	1.26065	2.88032	6.89372	3.11e-10	1.47e-09	12.5172	Up-Regulated
HIST1H4H	1.39458	5.54848	7.43123	2.06e-11	1.13e-10	15.1892	Up-Regulated
HIST1H4J	1.19548	3.45881	6.9188	2.74e-10	1.3e-09	12.6401	Up-Regulated
HIST2H2AA3	1.38686	8.18363	7.82034	2.79e-12	1.7e-11	17.167	Up-Regulated
HIST2H3C	1.02576	1.50707	4.84335	4.02e-06	1.14e-05	3.26204	Up-Regulated
HIST2H4A	1.26964	7.59584	7.67825	5.81e-12	3.42e-11	16.441	Up-Regulated
HJURP	3.61687	5.90937	15.8886	8.84e-31	8.36e-29	59.4925	Up-Regulated
HK3	-2.12717	8.82824	-9.37482	7.44e-16	7.15e-15	25.3164	Down-Regulated
HKDC1	1.25302	7.46977	4.79396	4.94e-06	1.39e-05	3.06309	Up-Regulated
HLA-DMA	-1.01726	11.7463	-6.13613	1.23e-08	4.81e-08	8.89913	Down-Regulated
HLA-DOA	-1.38012	10.8247	-7.09233	1.15e-10	5.71e-10	13.4955	Down-Regulated
HLA-DPA1	-1.23488	13.8348	-6.80039	4.93e-10	2.27e-09	12.0614	Down-Regulated
HLA-DPB1	-1.27085	13.0966	-6.96292	2.2e-10	1.06e-09	12.8568	Down-Regulated
HLA-DQA1	-1.11188	12.1736	-4.20343	5.22e-05	0.000127917	0.794248	Down-Regulated
HLA-DQB1	-1.17563	12.4254	-4.37719	2.66e-05	6.81e-05	1.44001	Down-Regulated
HLA-DRA	-1.24619	15.2976	-6.46486	2.55e-09	1.08e-08	10.4452	Down-Regulated
HLA-DRB1	-1.3035	13.8072	-6.04687	1.88e-08	7.17e-08	8.48628	Down-Regulated
HLA-DRB5	-1.32775	12.3167	-4.45715	1.94e-05	5.05e-05	1.74343	Down-Regulated
HLA-DRB6	-1.37769	9.69683	-3.49178	0.000681711	0.00142231	-1.64172	Down-Regulated
HLA-E	-1.21702	14.0695	-11.4402	1.07e-20	1.91e-19	36.3918	Down-Regulated
HLF	-2.57902	8.83482	-10.1453	1.17e-17	1.41e-16	29.439	Down-Regulated
HLX	-1.21021	8.06498	-9.20831	1.82e-15	1.64e-14	24.4301	Down-Regulated
HMBS	1.0046	8.47551	9.21934	1.71e-15	1.55e-14	24.4887	Up-Regulated
HMGA1	2.07226	10.8694	13.5934	1.12e-25	4.21e-24	47.7993	Up-Regulated
HMGA2	3.12404	3.59465	6.34722	4.51e-09	1.85e-08	9.88744	Up-Regulated
HMGB3	2.85724	10.3927	15.5812	4.12e-30	3.25e-28	57.9608	Up-Regulated
HMGCLL1	-2.2153	4.99589	-12.1118	2.9e-22	6.44e-21	39.9816	Down-Regulated
HMGCS1	-1.07857	10.8533	-8.04206	8.79e-13	5.71e-12	18.3077	Down-Regulated
HMGCS2	-3.12516	4.12593	-6.67845	9e-10	4.02e-09	11.4699	Down-Regulated
HMMR	3.3206	6.34213	16.4342	5.91e-32	6.86e-30	62.1823	Up-Regulated
HMSD	-1.1921	2.62228	-5.12917	1.19e-06	3.61e-06	4.43925	Down-Regulated
HN1	1.50847	10.6475	12.5818	2.36e-23	6.2e-22	42.4797	Up-Regulated
HN1L	1.03389	11.1925	13.1685	1.05e-24	3.32e-23	45.5751	Up-Regulated
HNF4G	3.35548	5.05111	12.569	2.52e-23	6.61e-22	42.4117	Up-Regulated
HOPX	-1.47913	12.184	-5.71248	8.88e-08	3.11e-07	6.96815	Down-Regulated
HORMAD1	2.71798	2.88398	6.33404	4.8e-09	1.97e-08	9.8253	Up-Regulated
HOTAIR	1.27671	0.756225	4.6792	7.92e-06	2.17e-05	2.60608	Up-Regulated
HOXA10	2.5295	3.53786	6.48943	2.27e-09	9.65e-09	10.5623	Up-Regulated
HOXA11	1.37875	1.21651	4.62518	9.88e-06	2.67e-05	2.39356	Up-Regulated
HOXA11AS	1.07163	0.779302	4.99409	2.13e-06	6.26e-06	3.8775	Up-Regulated
HOXA13	1.08907	0.631512	4.6251	9.88e-06	2.67e-05	2.39323	Up-Regulated
HOXA2	-1.06859	4.25616	-5.90874	3.59e-08	1.32e-07	7.85359	Down-Regulated
HOXA4	-1.90784	5.88253	-11.4434	1.05e-20	1.88e-19	36.4089	Down-Regulated
HOXA5	-1.59871	6.5762	-9.78992	7.97e-17	8.62e-16	27.5339	Down-Regulated
HOXB13	2.4309	1.61124	5.70668	9.12e-08	3.19e-07	6.94221	Up-Regulated
HOXB7	1.46821	6.39981	6.62397	1.18e-09	5.18e-09	11.2071	Up-Regulated
HOXB8	1.01904	2.88281	2.87107	0.00487144	0.00896152	-3.46483	Up-Regulated
HOXB9	3.34686	2.5428	7.53983	1.18e-11	6.71e-11	15.7378	Up-Regulated
HOXC10	2.29903	2.03979	5.09581	1.38e-06	4.14e-06	4.29964	Up-Regulated
HOXC11	2.19267	1.27469	6.02037	2.13e-08	8.07e-08	8.36433	Up-Regulated
HOXC13	2.6771	1.57896	6.92964	2.6e-10	1.24e-09	12.6933	Up-Regulated
HOXC6	1.31368	3.75944	4.39476	2.48e-05	6.38e-05	1.50636	Up-Regulated
HOXC8	1.54752	2.42871	5.33341	4.89e-07	1.56e-06	5.30624	Up-Regulated
HOXC9	1.78209	2.55165	5.54227	1.92e-07	6.45e-07	6.21374	Up-Regulated
HOXD11	1.18851	0.676608	4.76797	5.5e-06	1.54e-05	2.95891	Up-Regulated
HOXD13	1.00589	0.615976	3.28153	0.00136743	0.002737	-2.29244	Up-Regulated
HOXD3	1.19999	2.49845	4.08599	8.15e-05	0.000193953	0.3687	Up-Regulated
HOXD4	1.26446	2.25797	4.24368	4.48e-05	0.000110907	0.94214	Up-Regulated
HP	-1.25108	9.51672	-2.70827	0.00779689	0.0138266	-3.89239	Down-Regulated
HPCA	1.39725	1.75479	7.97427	1.25e-12	7.97e-12	17.9579	Up-Regulated
HPCAL1	-1.19892	11.1412	-11.5878	4.84e-21	9.09e-20	37.1826	Down-Regulated
HPCAL4	-1.35043	4.75155	-4.08589	8.16e-05	0.000194009	0.368314	Down-Regulated
HPD	-1.661	2.52019	-7.18919	7.06e-11	3.6e-10	13.9766	Down-Regulated
HPDL	2.42397	3.35449	10.4321	2.48e-18	3.27e-17	30.979	Up-Regulated
HPGD	-1.67016	10.7026	-5.47924	2.55e-07	8.43e-07	5.93773	Down-Regulated
HPGDS	-2.11363	6.64903	-8.13764	5.33e-13	3.54e-12	18.8022	Down-Regulated
HPR	-1.53609	2.88258	-5.62436	1.33e-07	4.54e-07	6.57596	Down-Regulated
HPRT1	1.03725	9.00612	10.9503	1.51e-19	2.31e-18	33.7633	Up-Regulated
HPS5	-1.04499	9.88051	-13.6739	7.37e-26	2.83e-24	48.2189	Down-Regulated
HPSE2	-2.4321	3.23076	-9.11634	2.98e-15	2.61e-14	23.9416	Down-Regulated
HRASLS	1.95775	2.9793	7.04049	1.49e-10	7.31e-10	13.2391	Up-Regulated
HRASLS5	-2.05922	5.18976	-7.70478	5.07e-12	3.01e-11	16.5762	Down-Regulated
HRC	-1.37513	4.24123	-8.00514	1.07e-12	6.85e-12	18.1171	Down-Regulated
HRCT1	-2.05357	5.36041	-9.00237	5.48e-15	4.64e-14	23.3373	Down-Regulated
HS3ST1	1.23788	7.72115	6.75129	6.29e-10	2.86e-09	11.8226	Up-Regulated
HS3ST6	-1.77688	2.63488	-5.48228	2.52e-07	8.32e-07	5.95101	Down-Regulated
HS6ST2	3.41884	7.41801	11.4773	8.78e-21	1.58e-19	36.5905	Up-Regulated
HSD17B13	-2.7658	5.03658	-7.63049	7.43e-12	4.32e-11	16.1979	Down-Regulated
HSD17B6	-3.23026	9.47087	-14.6823	3.96e-28	2.23e-26	53.4187	Down-Regulated
HSF2BP	1.78213	3.53978	8.61242	4.37e-14	3.3e-13	21.28	Up-Regulated
HSH2D	1.09299	7.65892	7.99449	1.13e-12	7.21e-12	18.0622	Up-Regulated
HSPA12B	-2.73518	8.09386	-19.0366	2.46e-37	9.34e-35	74.494	Down-Regulated
HSPA4L	1.04568	6.24859	5.20219	8.69e-07	2.68e-06	4.74684	Up-Regulated
HSPB2	-1.77831	6.59585	-11.5851	4.91e-21	9.21e-20	37.1678	Down-Regulated
HSPB3	-2.29681	3.0108	-11.264	2.77e-20	4.71e-19	35.4473	Down-Regulated
HSPB6	-2.76799	8.92135	-14.6579	4.49e-28	2.46e-26	53.2945	Down-Regulated
HSPB7	-1.64571	7.06116	-8.5703	5.46e-14	4.08e-13	21.0589	Down-Regulated
HSPB8	-2.27245	9.91841	-13.8089	3.64e-26	1.46e-24	48.921	Down-Regulated
HSPC159	-1.86187	9.51347	-12.4315	5.25e-23	1.3e-21	41.6823	Down-Regulated
HSPD1	1.18929	12.1395	15.7633	1.65e-30	1.44e-28	58.8697	Up-Regulated
HSPE1	1.09812	10.2125	12.3948	6.39e-23	1.56e-21	41.4875	Up-Regulated
HTR1D	1.86884	3.87642	5.63798	1.25e-07	4.28e-07	6.63635	Up-Regulated
HTR3A	4.52177	3.44207	11.5175	7.07e-21	1.3e-19	36.8059	Up-Regulated
HTR3C	-4.10234	2.5453	-16.4022	6.92e-32	7.89e-30	62.0257	Down-Regulated
HVCN1	-1.03708	8.1364	-7.34108	3.27e-11	1.73e-10	14.7358	Down-Regulated
HYAL1	-2.99362	8.97232	-12.4343	5.18e-23	1.29e-21	41.6969	Down-Regulated
HYAL2	-1.15629	11.3413	-11.1372	5.5e-20	8.98e-19	34.7665	Down-Regulated
HYDIN	-1.37976	6.89702	-3.68134	0.000354857	0.000769132	-1.02719	Down-Regulated
HYLS1	1.13732	6.38736	11.1177	6.11e-20	9.9e-19	34.6621	Up-Regulated
HYOU1	1.16416	11.9245	12.3645	7.51e-23	1.82e-21	41.3267	Up-Regulated
IBSP	3.0107	2.49579	8.09884	6.53e-13	4.3e-12	18.6013	Up-Regulated
ICAM1	-1.02271	13.339	-4.96953	2.36e-06	6.91e-06	3.77636	Down-Regulated
ICAM2	-1.40682	9.50902	-10.8424	2.7e-19	4e-18	33.1837	Down-Regulated
ICAM4	-2.14056	7.73919	-7.65032	6.71e-12	3.92e-11	16.2988	Down-Regulated
ICAM5	-1.85941	6.97362	-8.28496	2.46e-13	1.7e-12	19.5674	Down-Regulated
ICOS	-1.04593	5.9753	-4.73642	6.26e-06	1.73e-05	2.83302	Down-Regulated
ID1	-1.37923	10.3667	-6.78644	5.29e-10	2.42e-09	11.9935	Down-Regulated
ID2	-1.08578	10.1943	-7.78838	3.29e-12	1.99e-11	17.0033	Down-Regulated
ID3	-1.18438	10.2379	-8.52091	7.09e-14	5.22e-13	20.7999	Down-Regulated
ID4	-2.3139	8.97485	-11.4907	8.17e-21	1.48e-19	36.6625	Down-Regulated
IDH2	1.04301	10.7368	11.0468	8.96e-20	1.42e-18	34.2812	Up-Regulated
IDI1	-1.04309	10.5682	-9.84688	5.86e-17	6.45e-16	27.839	Down-Regulated
IER3	1.08881	10.3874	5.49328	2.4e-07	7.94e-07	5.99905	Up-Regulated
IER5L	1.31458	7.51629	7.40226	2.39e-11	1.29e-10	15.0433	Up-Regulated
IFI30	-1.16292	13.0662	-6.97704	2.05e-10	9.88e-10	12.9262	Down-Regulated
IFLTD1	-1.54667	1.7602	-4.98356	2.23e-06	6.52e-06	3.83411	Down-Regulated
IFNE	1.0242	1.09903	4.48246	1.75e-05	4.6e-05	1.84031	Up-Regulated
IFT140	-1.00913	9.45659	-7.85422	2.34e-12	1.44e-11	17.3407	Down-Regulated
IFT57	-1.26122	11.0065	-9.64217	1.77e-16	1.83e-15	26.7435	Down-Regulated
IGDCC4	1.56428	5.42122	7.61266	8.15e-12	4.71e-11	16.1073	Up-Regulated
IGF2BP1	2.47137	2.14749	5.69803	9.49e-08	3.31e-07	6.90361	Up-Regulated
IGF2BP3	2.58522	6.2718	7.77742	3.48e-12	2.1e-11	16.9472	Up-Regulated
IGFALS	-2.36215	5.21782	-8.17548	4.37e-13	2.93e-12	18.9984	Down-Regulated
IGFBP3	1.86267	11.2919	7.35413	3.06e-11	1.63e-10	14.8013	Up-Regulated
IGFBP6	-1.05601	7.75276	-3.92274	0.000149418	0.000342667	-0.207869	Down-Regulated
IGFBPL1	1.59255	3.39208	6.15216	1.14e-08	4.48e-08	8.97363	Up-Regulated
IGFL2	3.14723	2.60334	9.00093	5.52e-15	4.67e-14	23.3296	Up-Regulated
IGFN1	-1.13879	2.82629	-4.49948	1.64e-05	4.31e-05	1.90564	Down-Regulated
IGLON5	1.49513	2.37528	7.61475	8.06e-12	4.66e-11	16.1179	Up-Regulated
IGSF1	1.38283	2.80286	4.4511	1.99e-05	5.17e-05	1.72035	Up-Regulated
IGSF10	-3.60763	8.15886	-14.6051	5.89e-28	3.18e-26	53.0245	Down-Regulated
IGSF9	3.66155	7.04023	17.2845	9.39e-34	1.58e-31	66.3003	Up-Regulated
IHH	-3.93406	4.55098	-14.2138	4.43e-27	2.06e-25	51.016	Down-Regulated
IKBKE	1.13529	7.91695	10.0661	1.8e-17	2.11e-16	29.0139	Up-Regulated
IL11	2.49256	3.23982	9.21907	1.72e-15	1.56e-14	24.4873	Up-Regulated
IL11RA	-1.59369	7.77256	-12.5166	3.34e-23	8.58e-22	42.1339	Down-Regulated
IL12RB1	-1.19321	6.75502	-6.04134	1.93e-08	7.35e-08	8.4608	Down-Regulated
IL12RB2	1.11093	3.96159	4.35505	2.9e-05	7.37e-05	1.3567	Up-Regulated
IL16	-1.00013	9.52433	-6.2761	6.34e-09	2.56e-08	9.55268	Down-Regulated
IL17C	1.53049	1.33949	5.57305	1.68e-07	5.66e-07	6.34922	Up-Regulated
IL17D	-2.05138	4.90927	-13.5435	1.46e-25	5.4e-24	47.5387	Down-Regulated
IL17RD	1.30678	6.45932	6.46335	2.57e-09	1.09e-08	10.438	Up-Regulated
IL17RE	-1.40959	8.6013	-8.92485	8.28e-15	6.85e-14	22.9269	Down-Regulated
IL17REL	1.34539	1.74494	5.04942	1.68e-06	5e-06	4.10645	Up-Regulated
IL18R1	-1.39088	6.97953	-6.27597	6.34e-09	2.56e-08	9.55203	Down-Regulated
IL18RAP	-1.38626	4.74342	-6.24373	7.4e-09	2.97e-08	9.40089	Down-Regulated
IL1A	-2.1809	5.00355	-7.88418	2e-12	1.24e-11	17.4945	Down-Regulated
IL1B	-1.14013	7.62711	-4.41982	2.25e-05	5.81e-05	1.60131	Down-Regulated
IL1F5	2.92677	1.99178	7.77049	3.61e-12	2.18e-11	16.9118	Up-Regulated
IL1F7	2.46783	2.03136	6.17916	1.01e-08	3.96e-08	9.09929	Up-Regulated
IL1F9	1.56176	1.1063	6.2164	8.43e-09	3.36e-08	9.27304	Up-Regulated
IL1RAPL2	1.58413	0.865922	7.66379	6.26e-12	3.67e-11	16.3673	Up-Regulated
[truncated: 2,221 more rows]
