# Supplementary material for: Prognostic and immune infiltrative biomarkers of CENPO in pan–cancer and its relationship with lung adenocarcinoma cell proliferation and metastasis
Source: BMC Cancer. 2023 Aug 9;23:735. doi: 10.1186/s12885-023-11233-2 (PMC10410993; doi:10.1186/s12885-023-11233-2)
Supplement: Supplementary file 2 — Additional file 2. [file 12885_2023_11233_MOESM2_ESM.xlsx]

## Sheet: 960DEGs
row.names(tT)	logFC	AveExpr	t	P.Value	adj.P.Val	B	regulated
CENPO	1.25293	7.00781	31.1894	7.91e-121	1.62e-116	264.853	Up-Regulated
CKAP2L	1.92304	6.92015	21.5178	8.74e-74	8.98e-70	157.343	Up-Regulated
NCAPH	1.82921	7.72498	21.2075	2.97e-72	1.6e-68	153.84	Up-Regulated
TPX2	1.97528	9.66125	21.2032	3.12e-72	1.6e-68	153.792	Up-Regulated
CENPA	2.09631	6.40977	21.155	5.39e-72	2.21e-68	153.248	Up-Regulated
KIF23	1.78823	8.07764	21.1184	8.17e-72	2.8e-68	152.835	Up-Regulated
BUB1	1.80929	8.42521	20.9338	6.64e-71	1.95e-67	150.753	Up-Regulated
TTK	2.0594	7.07406	20.8655	1.44e-70	3.7e-67	149.984	Up-Regulated
MCM10	2.11308	6.85592	20.7954	3.19e-70	7.29e-67	149.193	Up-Regulated
CDCA5	1.72614	8.48008	20.68	1.18e-69	2.43e-66	147.894	Up-Regulated
KIF4A	2.04	8.10726	20.6368	1.93e-69	3.6e-66	147.407	Up-Regulated
BUB1B	1.79013	7.8577	20.5143	7.73e-69	1.32e-65	146.028	Up-Regulated
HJURP	1.94231	7.80156	20.4981	9.28e-69	1.46e-65	145.847	Up-Regulated
EXO1	1.95014	6.96241	20.4825	1.11e-68	1.62e-65	145.671	Up-Regulated
KIF2C	1.90138	8.37376	20.4626	1.39e-68	1.9e-65	145.447	Up-Regulated
RRM2	1.78445	9.65818	20.3774	3.64e-68	4.67e-65	144.488	Up-Regulated
ORC1L	1.72468	6.73037	20.3632	4.28e-68	5.16e-65	144.328	Up-Regulated
PRC1	1.46948	9.1739	20.129	6.05e-67	6.9e-64	141.697	Up-Regulated
SPAG5	1.5841	9.0536	19.9464	4.76e-66	5.14e-63	139.647	Up-Regulated
FOXM1	1.86231	9.28788	19.8907	8.93e-66	9.16e-63	139.022	Up-Regulated
PLK1	1.68999	8.61736	19.8376	1.62e-65	1.59e-62	138.427	Up-Regulated
RACGAP1	1.27953	9.27994	19.7515	4.29e-65	4.01e-62	137.462	Up-Regulated
SGOL1	1.8032	5.68143	19.6488	1.37e-64	1.22e-61	136.312	Up-Regulated
CDCA8	1.53319	8.32577	19.6364	1.57e-64	1.34e-61	136.173	Up-Regulated
CDC6	1.74646	8.33314	19.6259	1.77e-64	1.45e-61	136.055	Up-Regulated
FANCI	1.18878	9.17287	19.5729	3.21e-64	2.54e-61	135.462	Up-Regulated
DEPDC1	1.98325	7.26014	19.5655	3.49e-64	2.65e-61	135.38	Up-Regulated
ESPL1	1.93165	7.60948	19.5516	4.08e-64	2.99e-61	135.224	Up-Regulated
KIFC1	1.63115	8.58633	19.4696	1.03e-63	7.22e-61	134.307	Up-Regulated
NCAPG	1.72618	8.09035	19.4673	1.06e-63	7.22e-61	134.281	Up-Regulated
C1orf135	1.62662	5.38366	19.4451	1.35e-63	8.97e-61	134.033	Up-Regulated
CCNA2	1.63032	8.34789	19.4204	1.79e-63	1.15e-60	133.757	Up-Regulated
KIF18B	1.95808	7.42881	19.4002	2.24e-63	1.4e-60	133.532	Up-Regulated
CCNB2	1.66154	8.22974	19.3803	2.81e-63	1.7e-60	133.309	Up-Regulated
KPNA2	1.26245	10.9569	19.3703	3.14e-63	1.84e-60	133.197	Up-Regulated
AURKA	1.58747	8.52568	19.334	4.73e-63	2.69e-60	132.791	Up-Regulated
SKA1	1.7876	6.39217	19.3209	5.48e-63	3.04e-60	132.645	Up-Regulated
KIF11	1.46994	8.75441	19.3113	6.1e-63	3.3e-60	132.538	Up-Regulated
CENPI	1.98348	5.29712	19.2504	1.21e-62	6.26e-60	131.858	Up-Regulated
TOP2A	1.78047	10.82	19.2496	1.22e-62	6.26e-60	131.85	Up-Regulated
BIRC5	1.98174	8.01549	19.1943	2.27e-62	1.14e-59	131.232	Up-Regulated
MYBL2	2.19808	9.35234	19.1487	3.79e-62	1.85e-59	130.724	Up-Regulated
CDC45	1.88534	7.10964	19.1282	4.77e-62	2.28e-59	130.494	Up-Regulated
CDC20	1.80104	8.94286	18.9966	2.09e-61	9.74e-59	129.028	Up-Regulated
FAM64A	1.8951	6.35931	18.9846	2.39e-61	1.09e-58	128.895	Up-Regulated
NEK2	1.81522	7.82737	18.9387	3.99e-61	1.78e-58	128.384	Up-Regulated
NCAPG2	1.21276	9.01435	18.9033	5.94e-61	2.59e-58	127.99	Up-Regulated
KIF14	1.86963	7.03103	18.8921	6.73e-61	2.88e-58	127.865	Up-Regulated
KIAA1524	1.61436	7.06351	18.884	7.37e-61	3.07e-58	127.775	Up-Regulated
MELK	1.94902	7.70417	18.8828	7.47e-61	3.07e-58	127.761	Up-Regulated
C17orf53	1.54154	6.58385	18.8762	8.04e-61	3.24e-58	127.688	Up-Regulated
RAD54L	1.7624	6.7631	18.846	1.13e-60	4.45e-58	127.352	Up-Regulated
FAM72D	1.88031	5.74705	18.8307	1.34e-60	5.18e-58	127.182	Up-Regulated
ZWINT	1.369	9.00067	18.8235	1.45e-60	5.52e-58	127.102	Up-Regulated
PRR11	2.05788	6.09591	18.8213	1.49e-60	5.55e-58	127.078	Up-Regulated
CEP55	1.68101	8.41283	18.7682	2.69e-60	9.87e-58	126.488	Up-Regulated
ERCC6L	1.47646	6.26428	18.7615	2.9e-60	1.05e-57	126.413	Up-Regulated
FAM72B	1.72058	6.68929	18.7129	5e-60	1.77e-57	125.873	Up-Regulated
KIF15	1.74673	6.75419	18.6068	1.64e-59	5.69e-57	124.695	Up-Regulated
C15orf42	1.68806	6.31819	18.5649	2.61e-59	8.94e-57	124.23	Up-Regulated
ARHGAP11A	1.40457	8.1857	18.5278	3.95e-59	1.33e-56	123.818	Up-Regulated
RAD51	1.46008	6.744	18.4372	1.09e-58	3.59e-56	122.815	Up-Regulated
NUF2	1.85595	7.43291	18.3846	1.95e-58	6.36e-56	122.232	Up-Regulated
SPC25	1.60067	6.15833	18.3804	2.05e-58	6.56e-56	122.186	Up-Regulated
CDC25A	1.54064	6.34551	18.3432	3.1e-58	9.78e-56	121.774	Up-Regulated
NDC80	1.76628	7.33088	18.3367	3.33e-58	1.04e-55	121.702	Up-Regulated
SKA3	1.63977	6.71296	18.294	5.35e-58	1.64e-55	121.231	Up-Regulated
GTSE1	1.61047	7.33127	18.2728	6.77e-58	2.05e-55	120.996	Up-Regulated
DLGAP5	1.84778	7.81456	18.236	1.02e-57	3.03e-55	120.59	Up-Regulated
TROAP	1.94684	7.44599	18.1321	3.24e-57	9.5e-55	119.442	Up-Regulated
POLQ	1.77502	6.33454	18.1168	3.84e-57	1.11e-54	119.272	Up-Regulated
SGOL2	1.20171	7.48402	18.1147	3.93e-57	1.12e-54	119.249	Up-Regulated
CDCA3	1.63261	7.15994	18.0573	7.44e-57	2.09e-54	118.616	Up-Regulated
PLK4	1.36076	7.12133	18.0463	8.4e-57	2.33e-54	118.495	Up-Regulated
RAD51AP1	1.49421	7.23205	18.0279	1.03e-56	2.82e-54	118.292	Up-Regulated
CENPE	1.65648	7.42101	18.0237	1.08e-56	2.92e-54	118.246	Up-Regulated
AURKB	1.82059	7.43051	17.9994	1.41e-56	3.77e-54	117.978	Up-Regulated
FAM54A	1.56176	5.87738	17.9506	2.43e-56	6.39e-54	117.441	Up-Regulated
ANLN	1.81986	9.31049	17.9402	2.73e-56	7.08e-54	117.326	Up-Regulated
NUSAP1	1.35513	8.94543	17.9269	3.16e-56	8.1e-54	117.179	Up-Regulated
EPR1	1.92289	8.22159	17.8747	5.63e-56	1.43e-53	116.606	Up-Regulated
MAD2L1	1.50823	8.12221	17.8701	5.92e-56	1.48e-53	116.554	Up-Regulated
CHEK1	1.29482	7.55369	17.8272	9.52e-56	2.36e-53	116.083	Up-Regulated
CDC25C	1.77716	5.90069	17.791	1.42e-55	3.47e-53	115.685	Up-Regulated
ORC6L	1.44692	6.87533	17.786	1.5e-55	3.63e-53	115.63	Up-Regulated
DSCC1	1.40317	6.87659	17.6823	4.73e-55	1.13e-52	114.491	Up-Regulated
ASPM	1.73737	8.24205	17.6806	4.82e-55	1.14e-52	114.473	Up-Regulated
BLM	1.25964	7.10439	17.6573	6.23e-55	1.45e-52	114.218	Up-Regulated
GINS1	1.44982	7.8924	17.623	9.1e-55	2.1e-52	113.841	Up-Regulated
DTL	1.33999	8.06284	17.4554	5.78e-54	1.32e-51	112.005	Up-Regulated
TRIP13	1.70572	8.29092	17.4081	9.72e-54	2.19e-51	111.489	Up-Regulated
EME1	1.47746	5.99677	17.3877	1.22e-53	2.71e-51	111.265	Up-Regulated
STIL	1.19736	7.75609	17.3223	2.5e-53	5.51e-51	110.552	Up-Regulated
CLSPN	1.79877	6.48008	17.315	2.71e-53	5.91e-51	110.471	Up-Regulated
C11orf82	1.45082	6.70945	17.2892	3.59e-53	7.76e-51	110.19	Up-Regulated
SHCBP1	1.37961	7.48599	17.2395	6.2e-53	1.33e-50	109.647	Up-Regulated
BRCA1	1.28987	8.08113	17.2067	8.88e-53	1.88e-50	109.29	Up-Regulated
CCNB1	1.41051	9.37087	17.1981	9.76e-53	2.05e-50	109.196	Up-Regulated
CASC5	1.64348	6.54952	17.1595	1.49e-52	3.09e-50	108.776	Up-Regulated
CDK1	1.50681	9.07391	17.0971	2.96e-52	6.07e-50	108.096	Up-Regulated
FAM72A	1.67884	4.38853	17.0515	4.87e-52	9.89e-50	107.601	Up-Regulated
GSG2	1.33332	5.61231	16.989	9.64e-52	1.92e-49	106.922	Up-Regulated
SPC24	1.62307	4.01582	16.9488	1.5e-51	2.95e-49	106.485	Up-Regulated
MKI67	1.59888	10.2293	16.9165	2.13e-51	4.16e-49	106.135	Up-Regulated
CDCA2	1.59329	6.43251	16.9	2.55e-51	4.94e-49	105.956	Up-Regulated
TYMS	1.24864	9.01116	16.8988	2.58e-51	4.96e-49	105.943	Up-Regulated
UBE2C	1.98507	8.84248	16.8762	3.31e-51	6.28e-49	105.698	Up-Regulated
OIP5	1.60347	5.60183	16.8658	3.7e-51	6.97e-49	105.586	Up-Regulated
MCM2	1.19034	9.89911	16.8235	5.87e-51	1.1e-48	105.127	Up-Regulated
CENPW	1.3668	6.8421	16.6968	2.33e-50	4.24e-48	103.757	Up-Regulated
UHRF1	1.48933	7.93637	16.647	4.01e-50	7.23e-48	103.218	Up-Regulated
TACC3	1.07559	9.73905	16.5553	1.09e-49	1.92e-47	102.23	Up-Regulated
CDKN3	1.71211	6.8424	16.5548	1.09e-49	1.92e-47	102.224	Up-Regulated
CDT1	1.43062	8.02428	16.5499	1.15e-49	2e-47	102.172	Up-Regulated
HMMR	1.55433	7.78684	16.5462	1.2e-49	2.07e-47	102.132	Up-Regulated
UBE2T	1.38773	8.20364	16.5324	1.39e-49	2.38e-47	101.983	Up-Regulated
XRCC2	1.43943	5.85948	16.5229	1.54e-49	2.62e-47	101.88	Up-Regulated
FAM83D	1.54069	7.9036	16.5191	1.61e-49	2.71e-47	101.839	Up-Regulated
CENPF	1.58244	9.64316	16.5171	1.65e-49	2.75e-47	101.817	Up-Regulated
DIAPH3	1.47235	6.59479	16.4729	2.66e-49	4.4e-47	101.342	Up-Regulated
MCM4	1.19773	10.206	16.4619	2.99e-49	4.91e-47	101.223	Up-Regulated
HELLS	1.36284	6.724	16.4035	5.63e-49	9.17e-47	100.596	Up-Regulated
FANCB	1.24943	4.17141	16.3788	7.35e-49	1.19e-46	100.33	Up-Regulated
BRIP1	1.47508	6.09993	16.2726	2.32e-48	3.69e-46	99.1906	Up-Regulated
ESCO2	1.42569	6.24063	16.2407	3.27e-48	5.12e-46	98.8485	Up-Regulated
C12orf48	1.27388	6.72045	16.009	3.96e-47	6.11e-45	96.3722	Up-Regulated
KIF20B	1.03255	7.96142	15.9481	7.61e-47	1.17e-44	95.7225	Up-Regulated
PKMYT1	1.5275	7.56307	15.8962	1.33e-46	2.02e-44	95.1707	Up-Regulated
KIF20A	1.40107	8.27439	15.8829	1.53e-46	2.31e-44	95.0285	Up-Regulated
DEPDC1B	1.65475	6.76148	15.8652	1.85e-46	2.77e-44	94.841	Up-Regulated
KIF18A	1.18653	6.88765	15.8621	1.91e-46	2.85e-44	94.8076	Up-Regulated
WDHD1	1.17289	7.87555	15.7976	3.81e-46	5.63e-44	94.1224	Up-Regulated
GINS4	1.29259	7.18073	15.6498	1.85e-45	2.67e-43	92.5561	Up-Regulated
E2F8	1.39913	6.90155	15.5701	4.31e-45	6.15e-43	91.7136	Up-Regulated
RFC4	1.04635	8.26206	15.5585	4.88e-45	6.91e-43	91.5908	Up-Regulated
WDR76	1.00936	7.36662	15.4781	1.15e-44	1.61e-42	90.7428	Up-Regulated
GINS2	1.35759	7.50523	15.4556	1.46e-44	2.02e-42	90.5057	Up-Regulated
ASF1B	1.19539	8.40043	15.4459	1.61e-44	2.21e-42	90.4033	Up-Regulated
PSRC1	1.09279	6.93527	15.4216	2.09e-44	2.84e-42	90.1474	Up-Regulated
CCNE1	1.5773	6.84708	15.3707	3.58e-44	4.8e-42	89.6127	Up-Regulated
ARHGAP11B	1.39022	4.25353	15.3153	6.43e-44	8.47e-42	89.0309	Up-Regulated
MTHFD2	1.06304	10.4731	15.227	1.64e-43	2.13e-41	88.1039	Up-Regulated
PBK	1.71497	7.02441	15.2107	1.94e-43	2.49e-41	87.9339	Up-Regulated
EZH2	1.11459	8.28674	15.0967	6.45e-43	8.1e-41	86.7419	Up-Regulated
ATAD2	1.08969	9.71325	15.0965	6.47e-43	8.1e-41	86.7397	Up-Regulated
ECT2	1.14031	9.78491	15.07	8.54e-43	1.06e-40	86.4633	Up-Regulated
POLE2	1.45937	6.04411	15.0272	1.34e-42	1.65e-40	86.0165	Up-Regulated
UBE2S	1.23992	8.36833	14.9976	1.83e-42	2.23e-40	85.7078	Up-Regulated
PSMC3IP	1.1339	6.41888	14.9627	2.64e-42	3.2e-40	85.3447	Up-Regulated
TK1	1.31157	9.91576	14.8846	5.97e-42	7.09e-40	84.5331	Up-Regulated
RAD54B	1.06814	6.60274	14.7967	1.5e-41	1.73e-39	83.6217	Up-Regulated
ATAD5	1.1154	6.65435	14.7967	1.5e-41	1.73e-39	83.6214	Up-Regulated
E2F2	1.20763	6.8681	14.7928	1.56e-41	1.79e-39	83.5812	Up-Regulated
E2F1	1.21088	8.5286	14.7573	2.26e-41	2.57e-39	83.213	Up-Regulated
MLF1IP	1.16116	8.20503	14.448	5.6e-40	6.21e-38	80.0261	Up-Regulated
PRIM1	1.02222	7.13875	14.4037	8.84e-40	9.71e-38	79.5723	Up-Regulated
KIAA0101	1.29533	8.01464	14.2864	2.96e-39	3.2e-37	78.3722	Up-Regulated
MTBP	1.06561	6.39956	14.2553	4.08e-39	4.38e-37	78.0553	Up-Regulated
IQGAP3	1.38181	8.80476	14.1665	1.01e-38	1.07e-36	77.1505	Up-Regulated
NEIL3	1.85985	5.50808	14.1179	1.67e-38	1.73e-36	76.6564	Up-Regulated
KNTC1	1.02219	8.77769	14.0745	2.6e-38	2.67e-36	76.216	Up-Regulated
HMGA1	1.11473	11.819	14.0139	4.83e-38	4.91e-36	75.6026	Up-Regulated
DNA2	1.08478	6.98753	13.8606	2.3e-37	2.26e-35	74.054	Up-Regulated
C9orf140	1.32338	8.32516	13.8575	2.37e-37	2.32e-35	74.0232	Up-Regulated
CDC7	1.02552	7.42793	13.7765	5.4e-37	5.15e-35	73.2076	Up-Regulated
C16orf59	1.1676	6.6452	13.7667	5.96e-37	5.66e-35	73.1099	Up-Regulated
STMN1	1.0631	11.2894	13.561	4.75e-36	4.31e-34	71.0509	Up-Regulated
C9orf100	1.011	7.10689	13.5229	6.95e-36	6.29e-34	70.6718	Up-Regulated
CTSL2	1.88828	6.37287	13.5123	7.74e-36	6.97e-34	70.5657	Up-Regulated
KIF4B	1.09241	2.92568	13.4029	2.31e-35	2.04e-33	69.479	Up-Regulated
MND1	1.21445	5.45825	13.3847	2.78e-35	2.44e-33	69.2985	Up-Regulated
E2F7	1.49194	5.78056	13.3248	5.05e-35	4.3e-33	68.7051	Up-Regulated
C5orf34	1.13847	5.73064	13.2997	6.48e-35	5.48e-33	68.4574	Up-Regulated
CENPK	1.18397	6.49341	13.0833	5.55e-34	4.54e-32	66.328	Up-Regulated
CENPM	1.0685	7.08636	12.9693	1.71e-33	1.35e-31	65.2134	Up-Regulated
GPR19	1.25722	4.104	12.8596	5.01e-33	3.85e-31	64.1457	Up-Regulated
WDR62	1.33805	7.32186	12.8179	7.54e-33	5.73e-31	63.7406	Up-Regulated
RDM1	1.44421	3.2163	12.7539	1.41e-32	1.06e-30	63.1205	Up-Regulated
RECQL4	1.22266	8.37572	12.6569	3.62e-32	2.64e-30	62.1841	Up-Regulated
PIF1	1.29853	5.54011	12.4772	2.06e-31	1.46e-29	60.4597	Up-Regulated
FAM111B	1.16017	7.56079	12.3941	4.6e-31	3.22e-29	59.666	Up-Regulated
CCNE2	1.20132	7.15255	12.3876	4.89e-31	3.42e-29	59.6044	Up-Regulated
IGF2BP3	2.31088	7.47458	12.3299	8.51e-31	5.86e-29	59.0552	Up-Regulated
MTL5	1.67129	5.69982	12.2352	2.11e-30	1.42e-28	58.1572	Up-Regulated
ZNF695	1.86523	3.96467	11.9852	2.26e-29	1.39e-27	55.8056	Up-Regulated
MFSD2B	1.01808	5.49158	11.9215	4.12e-29	2.49e-27	55.2106	Up-Regulated
KIF3C	1.14315	8.31362	11.9136	4.44e-29	2.67e-27	55.1368	Up-Regulated
GGH	1.34511	8.51122	11.7713	1.69e-28	9.77e-27	53.8153	Up-Regulated
PFN2	1.30876	10.4495	11.488	2.34e-27	1.26e-25	51.2107	Up-Regulated
DNMT3B	1.13248	6.40356	11.3399	9.11e-27	4.71e-25	49.8637	Up-Regulated
CCDC150	1.27188	4.54454	11.2997	1.32e-26	6.68e-25	49.4999	Up-Regulated
IL12RB2	1.49426	4.2937	11.1626	4.57e-26	2.21e-24	48.266	Up-Regulated
LOC399815	1.15689	3.67394	11.0566	1.19e-25	5.59e-24	47.3174	Up-Regulated
UCK2	1.17224	7.85802	11.0283	1.54e-25	7.13e-24	47.065	Up-Regulated
PTTG1	1.04099	8.56526	11.0171	1.7e-25	7.85e-24	46.9652	Up-Regulated
HIST1H2BO	1.0249	1.56362	10.9552	2.97e-25	1.34e-23	46.4156	Up-Regulated
SLC2A1	1.27812	11.2123	10.8433	8.06e-25	3.57e-23	45.4264	Up-Regulated
SLC7A5	1.13072	10.9179	10.456	2.44e-23	9.47e-22	42.0522	Up-Regulated
PSAT1	1.23427	8.65396	10.1082	4.88e-22	1.66e-20	39.0907	Up-Regulated
ARNTL2	1.377	6.98593	10.0278	9.66e-22	3.19e-20	38.416	Up-Regulated
MGC87042	1.20033	4.95684	9.88921	3.11e-21	9.89e-20	37.2604	Up-Regulated
RAB3B	1.66294	2.54911	9.86018	3.97e-21	1.25e-19	37.0198	Up-Regulated
LOC647946	1.26009	2.74674	9.75204	9.79e-21	2.93e-19	36.1277	Up-Regulated
MLLT11	1.28666	6.92208	9.65058	2.27e-20	6.56e-19	35.297	Up-Regulated
RPL39L	1.10983	7.71701	9.54994	5.2e-20	1.43e-18	34.4789	Up-Regulated
GNG4	2.04564	5.39071	9.53805	5.73e-20	1.56e-18	34.3826	Up-Regulated
SHOX2	1.45667	3.93057	9.47861	9.32e-20	2.46e-18	33.9027	Up-Regulated
TUBB3	1.20899	10.524	9.41048	1.62e-19	4.17e-18	33.3552	Up-Regulated
GBX2	1.00246	0.950307	9.25505	5.69e-19	1.38e-17	32.1165	Up-Regulated
GUCA1A	1.14549	1.91889	9.2309	6.91e-19	1.66e-17	31.9254	Up-Regulated
IGF2BP2	1.24335	8.2962	9.2298	6.97e-19	1.67e-17	31.9167	Up-Regulated
ZYG11A	1.67413	4.68313	9.1765	1.07e-18	2.47e-17	31.4962	Up-Regulated
MT1H	1.38953	2.77319	9.14573	1.36e-18	3.13e-17	31.2542	Up-Regulated
IGF2BP1	2.47092	3.61966	9.14374	1.39e-18	3.17e-17	31.2386	Up-Regulated
PLOD2	1.0643	10.6882	9.07364	2.42e-18	5.37e-17	30.6896	Up-Regulated
HPDL	1.25273	4.50729	9.06895	2.51e-18	5.56e-17	30.6529	Up-Regulated
SH2D5	1.26713	2.17442	9.06862	2.52e-18	5.57e-17	30.6504	Up-Regulated
GPR115	1.84609	5.31097	8.94284	6.77e-18	1.42e-16	29.6734	Up-Regulated
HIST1H2BJ	1.14271	4.60366	8.91325	8.54e-18	1.78e-16	29.445	Up-Regulated
STC2	1.10833	7.95158	8.86319	1.26e-17	2.56e-16	29.0599	Up-Regulated
DSP	1.16611	12.3856	8.7828	2.36e-17	4.56e-16	28.4448	Up-Regulated
RCOR2	1.36156	5.5801	8.74146	3.24e-17	6.11e-16	28.13	Up-Regulated
LOC100131551	1.15386	1.86145	8.73973	3.29e-17	6.18e-16	28.117	Up-Regulated
CDH18	1.45296	1.1072	8.73102	3.51e-17	6.59e-16	28.0508	Up-Regulated
FLJ22536	1.07491	4.2284	8.56853	1.22e-16	2.15e-15	26.8256	Up-Regulated
GLDC	1.54428	4.85616	8.45903	2.79e-16	4.73e-15	26.0097	Up-Regulated
DDN	1.04161	3.19594	8.39955	4.36e-16	7.25e-15	25.5699	Up-Regulated
DRP2	1.11595	3.52936	8.39641	4.46e-16	7.41e-15	25.5467	Up-Regulated
COCH	1.52516	6.44416	8.34805	6.41e-16	1.04e-14	25.191	Up-Regulated
MAGEA6	2.76505	2.96469	8.20125	1.9e-15	2.87e-14	24.1205	Up-Regulated
GAL	1.77823	2.98219	8.14279	2.92e-15	4.3e-14	23.6983	Up-Regulated
MAGEA3	2.65763	2.79992	8.1385	3.01e-15	4.43e-14	23.6675	Up-Regulated
STC1	1.03401	8.58938	8.05893	5.38e-15	7.68e-14	23.0968	Up-Regulated
DPF1	1.03803	2.07945	8.02645	6.81e-15	9.58e-14	22.8651	Up-Regulated
C12orf39	1.32069	1.14131	7.99921	8.3e-15	1.15e-13	22.6713	Up-Regulated
POPDC3	1.71355	3.12961	7.96589	1.06e-14	1.45e-13	22.435	Up-Regulated
MAGEA2	2.37511	2.22336	7.89879	1.71e-14	2.29e-13	21.9615	Up-Regulated
CSAG3	1.87075	2.00673	7.88371	1.9e-14	2.53e-13	21.8555	Up-Regulated
CLGN	1.45689	5.35767	7.86613	2.16e-14	2.84e-13	21.7321	Up-Regulated
SLC6A15	1.54458	1.75251	7.86246	2.21e-14	2.91e-13	21.7064	Up-Regulated
KCNMB4	1.10802	7.09795	7.84035	2.59e-14	3.38e-13	21.5516	Up-Regulated
GPC2	1.09799	4.50187	7.7926	3.64e-14	4.62e-13	21.2185	Up-Regulated
PTPRN	1.64249	3.34175	7.77258	4.19e-14	5.28e-13	21.0793	Up-Regulated
KIR2DL4	1.12344	2.61664	7.76602	4.39e-14	5.51e-13	21.0337	Up-Regulated
GZMB	1.06237	7.04465	7.73099	5.62e-14	6.92e-13	20.791	Up-Regulated
HOXD13	1.33685	1.03303	7.71975	6.08e-14	7.47e-13	20.7133	Up-Regulated
GPC6	1.05784	7.87073	7.70678	6.67e-14	8.15e-13	20.6238	Up-Regulated
RIMS2	1.58169	2.5085	7.70484	6.76e-14	8.24e-13	20.6105	Up-Regulated
TRPA1	1.17258	2.53028	7.65948	9.28e-14	1.12e-12	20.2983	Up-Regulated
CCL26	1.05187	2.5725	7.61435	1.27e-13	1.51e-12	19.9892	Up-Regulated
ELOVL4	1.12131	4.41535	7.61052	1.31e-13	1.55e-12	19.9631	Up-Regulated
GREM1	1.44443	9.12717	7.57682	1.65e-13	1.94e-12	19.7333	Up-Regulated
C1orf61	1.5505	3.16918	7.55282	1.95e-13	2.26e-12	19.5702	Up-Regulated
PLAC1	1.19246	2.88389	7.53899	2.14e-13	2.48e-12	19.4763	Up-Regulated
ADAMTS20	1.05586	1.02305	7.5332	2.23e-13	2.57e-12	19.4371	Up-Regulated
SP8	1.60728	2.44986	7.49553	2.89e-13	3.28e-12	19.1824	Up-Regulated
KCND2	1.10083	5.05567	7.49532	2.9e-13	3.28e-12	19.181	Up-Regulated
CSAG1	1.8387	1.88356	7.44468	4.1e-13	4.54e-12	18.8403	Up-Regulated
ELOVL6	1.04211	7.57663	7.43136	4.49e-13	4.95e-12	18.7509	Up-Regulated
SEMA3A	1.24754	7.45796	7.412	5.13e-13	5.58e-12	18.6213	Up-Regulated
C5orf46	1.22824	2.51352	7.40255	5.47e-13	5.93e-12	18.5581	Up-Regulated
HOXA1	1.07872	4.13334	7.38594	6.12e-13	6.58e-12	18.4473	Up-Regulated
MAGEA12	2.07816	2.13302	7.37361	6.66e-13	7.12e-12	18.3652	Up-Regulated
APCDD1L	1.3128	3.79222	7.36507	7.05e-13	7.51e-12	18.3083	Up-Regulated
HIST1H2BH	1.00464	2.11679	7.36398	7.11e-13	7.56e-12	18.3011	Up-Regulated
C17orf104	1.10185	4.14907	7.3616	7.22e-13	7.67e-12	18.2853	Up-Regulated
YBX2	1.62855	4.6985	7.34462	8.1e-13	8.53e-12	18.1724	Up-Regulated
C12orf56	1.61102	2.49809	7.27424	1.3e-12	1.34e-11	17.7071	Up-Regulated
GCLC	1.05747	10.1203	7.26394	1.4e-12	1.42e-11	17.6393	Up-Regulated
LIN28B	1.32406	1.09079	7.22667	1.79e-12	1.8e-11	17.3947	Up-Regulated
FAM40B	1.0542	6.73782	7.21134	1.98e-12	1.98e-11	17.2943	Up-Regulated
GREB1L	1.26708	3.99142	7.18473	2.37e-12	2.33e-11	17.1206	Up-Regulated
TEX15	1.36217	1.83476	7.1747	2.53e-12	2.48e-11	17.0552	Up-Regulated
MMP12	1.46998	7.90394	7.09286	4.35e-12	4.12e-11	16.5247	Up-Regulated
HOXA11	1.2293	1.67939	7.08711	4.52e-12	4.26e-11	16.4876	Up-Regulated
ALX1	1.05694	1.23867	7.04028	6.15e-12	5.7e-11	16.1865	Up-Regulated
FAM133A	1.8099	3.00991	7.0235	6.86e-12	6.31e-11	16.0791	Up-Regulated
FGF5	1.00777	1.3126	6.87482	1.8e-11	1.57e-10	15.1359	Up-Regulated
LHX2	1.03826	2.13146	6.86953	1.86e-11	1.62e-10	15.1027	Up-Regulated
PRAME	2.18319	5.60027	6.82899	2.41e-11	2.06e-10	14.8486	Up-Regulated
SYT1	1.19476	6.1519	6.78514	3.19e-11	2.67e-10	14.5752	Up-Regulated
NKAIN1	1.06599	2.81206	6.73867	4.28e-11	3.52e-10	14.287	Up-Regulated
DUSP13	1.4803	3.18907	6.72056	4.8e-11	3.91e-10	14.1752	Up-Regulated
LYPD3	1.11125	7.30226	6.69572	5.62e-11	4.53e-10	14.0222	Up-Regulated
CSAG2	1.39388	1.19992	6.69172	5.76e-11	4.63e-10	13.9975	Up-Regulated
NAT8L	1.11764	3.84774	6.67034	6.59e-11	5.25e-10	13.8664	Up-Regulated
ADAM12	1.0001	8.32443	6.64381	7.78e-11	6.13e-10	13.704	Up-Regulated
PTHLH	1.14295	5.61721	6.64059	7.93e-11	6.24e-10	13.6843	Up-Regulated
EGLN3	1.01613	9.45969	6.63135	8.41e-11	6.57e-10	13.6279	Up-Regulated
FOSL1	1.04477	6.90285	6.59964	1.02e-10	7.92e-10	13.4349	Up-Regulated
MAGEB2	1.31029	1.16548	6.5676	1.25e-10	9.51e-10	13.2406	Up-Regulated
UCHL1	1.3727	8.54325	6.49507	1.95e-10	1.45e-09	12.8038	Up-Regulated
MAGEC1	1.39873	1.55578	6.4904	2.01e-10	1.48e-09	12.7758	Up-Regulated
MAGEC2	1.59093	1.71841	6.41484	3.19e-10	2.29e-09	12.3254	Up-Regulated
COL11A1	1.69507	8.16667	6.40564	3.37e-10	2.41e-09	12.2709	Up-Regulated
CABYR	1.20638	6.54805	6.36074	4.43e-10	3.1e-09	12.0057	Up-Regulated
HOXD11	1.0442	1.14898	6.36068	4.43e-10	3.1e-09	12.0054	Up-Regulated
SLC6A17	1.03888	3.0736	6.33102	5.3e-10	3.67e-09	11.8311	Up-Regulated
CHRNA9	1.42695	2.31619	6.30905	6.04e-10	4.15e-09	11.7024	Up-Regulated
MAGEA1	1.48163	1.55617	6.2243	1e-09	6.64e-09	11.2097	Up-Regulated
HMGA2	1.76459	4.91749	6.2155	1.06e-09	6.98e-09	11.1589	Up-Regulated
SBSN	1.1862	2.27193	6.20995	1.09e-09	7.19e-09	11.1268	Up-Regulated
MSI1	1.24279	4.36252	6.20138	1.15e-09	7.55e-09	11.0774	Up-Regulated
PCSK1	1.62756	4.24841	6.19258	1.21e-09	7.92e-09	11.0268	Up-Regulated
HIST1H2AE	1.09174	3.68266	6.16214	1.45e-09	9.36e-09	10.852	Up-Regulated
FSTL5	1.16715	1.34145	6.12029	1.85e-09	1.18e-08	10.6129	Up-Regulated
RGS20	1.04757	3.72935	6.07499	2.41e-09	1.5e-08	10.3557	Up-Regulated
GABRA3	1.38676	2.09107	6.04738	2.83e-09	1.75e-08	10.1997	Up-Regulated
PKP2	1.0563	7.38662	5.91802	5.94e-09	3.51e-08	9.47722	Up-Regulated
FAM83A	1.07559	10.112	5.877	7.5e-09	4.37e-08	9.25092	Up-Regulated
FAM83F	1.23528	4.90621	5.76965	1.37e-08	7.69e-08	8.6653	Up-Regulated
MAGEA9B	1.33357	1.35864	5.74717	1.55e-08	8.65e-08	8.5439	Up-Regulated
VWDE	1.07776	4.71919	5.72448	1.76e-08	9.73e-08	8.42177	Up-Regulated
GPR158	1.21363	3.53042	5.67319	2.34e-08	1.27e-07	8.14722	Up-Regulated
SLC5A12	1.03621	2.4573	5.66119	2.5e-08	1.35e-07	8.08332	Up-Regulated
ABCC2	1.39495	4.6175	5.62164	3.1e-08	1.65e-07	7.87347	Up-Regulated
MAGEA10	1.17365	1.09822	5.62103	3.11e-08	1.66e-07	7.87028	Up-Regulated
HTR1D	1.05312	4.60198	5.62058	3.12e-08	1.66e-07	7.86791	Up-Regulated
MKRN3	1.06026	2.28632	5.61955	3.14e-08	1.67e-07	7.86245	Up-Regulated
HTR2C	1.00196	1.26475	5.54212	4.77e-08	2.47e-07	7.4556	Up-Regulated
NMU	1.22786	4.8085	5.53268	5.02e-08	2.59e-07	7.4063	Up-Regulated
DLL3	1.31852	3.41186	5.5314	5.06e-08	2.61e-07	7.39965	Up-Regulated
TCAM1P	1.13355	2.65325	5.4917	6.26e-08	3.17e-07	7.19333	Up-Regulated
FOXD1	1.02266	3.13014	5.47195	6.95e-08	3.5e-07	7.09123	Up-Regulated
TNNT1	1.47092	6.48994	5.46931	7.05e-08	3.54e-07	7.0776	Up-Regulated
?|729884	1.44662	5.53541	5.40683	9.82e-08	4.82e-07	6.75676	Up-Regulated
SMC1B	1.11059	3.15233	5.3877	1.09e-07	5.3e-07	6.65919	Up-Regulated
CTAG1B	1.27409	1.36771	5.35062	1.32e-07	6.35e-07	6.47092	Up-Regulated
FGB	2.21377	5.54705	5.3341	1.44e-07	6.88e-07	6.38742	Up-Regulated
SERPINB5	1.5358	5.10038	5.3206	1.54e-07	7.33e-07	6.31939	Up-Regulated
POU4F1	1.0683	2.75134	5.31857	1.56e-07	7.39e-07	6.30915	Up-Regulated
MAGEA4	1.38147	1.49823	5.22303	2.56e-07	1.17e-06	5.83209	Up-Regulated
IL1F5	1.21109	3.52761	5.16701	3.4e-07	1.53e-06	5.55598	Up-Regulated
INA	1.17931	3.27467	5.16303	3.47e-07	1.56e-06	5.53645	Up-Regulated
AKR1B15	1.20204	2.60262	5.13582	3.99e-07	1.77e-06	5.4034	Up-Regulated
CPS1	1.72588	6.73302	5.10986	4.55e-07	2.01e-06	5.27706	Up-Regulated
KIF1A	1.71632	4.89144	5.10481	4.66e-07	2.05e-06	5.25253	Up-Regulated
CRABP1	1.19777	3.15078	5.03611	6.58e-07	2.83e-06	4.92129	Up-Regulated
HHIPL2	1.33065	4.82476	5.00989	7.49e-07	3.19e-06	4.7959	Up-Regulated
HOXA10	1.16019	4.67947	4.99791	7.95e-07	3.38e-06	4.73885	Up-Regulated
COL2A1	1.11766	1.98943	4.93793	1.07e-06	4.45e-06	4.45491	Up-Regulated
MYEOV	1.24781	6.16484	4.93642	1.08e-06	4.48e-06	4.44781	Up-Regulated
HOXB9	1.46753	3.96745	4.93382	1.09e-06	4.53e-06	4.43558	Up-Regulated
LOC440905	1.04325	2.91187	4.91689	1.18e-06	4.89e-06	4.35607	Up-Regulated
TUBB2B	1.11785	5.73675	4.81241	1.96e-06	7.81e-06	3.87086	Up-Regulated
LBP	1.10651	2.11554	4.76064	2.51e-06	9.82e-06	3.634	Up-Regulated
GAGE12D	1.02099	0.847175	4.69758	3.38e-06	1.3e-05	3.34859	Up-Regulated
CXorf61	1.30759	3.46805	4.53	7.33e-06	2.64e-05	2.60725	Up-Regulated
SLC15A1	1.04533	3.93574	4.4987	8.45e-06	3e-05	2.47152	Up-Regulated
B4GALNT4	1.02161	6.10792	4.42357	1.18e-05	4.1e-05	2.14934	Up-Regulated
PAH	1.07475	2.89147	4.29496	2.09e-05	6.93e-05	1.60943	Up-Regulated
KLK6	1.19142	3.54315	4.20419	3.09e-05	9.96e-05	1.23733	Up-Regulated
NR0B1	1.14492	2.02067	4.06301	5.6e-05	0.000172368	0.67336	Up-Regulated
LY6K	1.05936	6.22145	4.00346	7.16e-05	0.000216681	0.440873	Up-Regulated
PAEP	1.27127	5.83384	3.46396	0.000576539	0.00147255	-1.51718	Up-Regulated
MUC16	1.09063	7.80624	3.45566	0.000594175	0.00151439	-1.54521	Up-Regulated
FGL1	1.08598	5.88647	3.24761	0.00123948	0.00297273	-2.22663	Up-Regulated
BARX1	1.02308	4.55061	3.14707	0.00174439	0.00405943	-2.54134	Up-Regulated
FGA	1.03731	7.91604	2.89196	0.00399002	0.00858649	-3.29713	Up-Regulated
C16orf89	-3.17548	10.603	-15.705	1.03e-45	1.5e-43	93.1402	Down-Regulated
SELENBP1	-1.62686	11.3506	-14.4045	8.77e-40	9.68e-38	79.5801	Down-Regulated
PCDP1	-2.44452	6.8286	-14.1316	1.45e-38	1.51e-36	76.7963	Down-Regulated
NFIX	-1.24016	10.238	-13.8204	3.46e-37	3.35e-35	73.6493	Down-Regulated
C1QTNF7	-1.75459	5.3211	-13.3821	2.85e-35	2.49e-33	69.2732	Down-Regulated
FCER1A	-2.31711	5.47578	-13.3307	4.76e-35	4.07e-33	68.7634	Down-Regulated
SUSD2	-2.24542	10.4201	-12.9744	1.62e-33	1.29e-31	65.2636	Down-Regulated
CYP4B1	-2.78666	9.04582	-12.6765	2.99e-32	2.22e-30	62.3732	Down-Regulated
GNG7	-1.18056	6.9801	-12.6755	3.02e-32	2.23e-30	62.3633	Down-Regulated
CACNA2D2	-2.54151	8.60738	-12.6527	3.77e-32	2.74e-30	62.1443	Down-Regulated
HLF	-1.9786	7.67643	-12.4788	2.03e-31	1.44e-29	60.4751	Down-Regulated
VIPR1	-1.45146	7.52018	-12.3668	5.97e-31	4.15e-29	59.4067	Down-Regulated
FLJ42875	-1.92439	3.91417	-12.303	1.1e-30	7.54e-29	58.7997	Down-Regulated
C15orf59	-1.52287	4.05267	-12.2455	1.91e-30	1.29e-28	58.2548	Down-Regulated
C1orf116	-1.71541	11.5698	-12.2178	2.49e-30	1.66e-28	57.9928	Down-Regulated
PIGR	-2.90084	12.1217	-12.204	2.84e-30	1.87e-28	57.8622	Down-Regulated
CD1E	-1.95959	5.13874	-12.1513	4.68e-30	3.02e-28	57.3651	Down-Regulated
LOC723809	-2.30837	4.02846	-12.1453	4.96e-30	3.19e-28	57.3087	Down-Regulated
TMEM125	-1.11684	10.4857	-12.1407	5.18e-30	3.32e-28	57.2654	Down-Regulated
CD207	-2.57724	5.82463	-12.1294	5.77e-30	3.68e-28	57.1585	Down-Regulated
TMEM163	-1.67845	8.58736	-12.1191	6.36e-30	4.04e-28	57.0617	Down-Regulated
CYP2B7P1	-2.42474	9.83613	-11.9904	2.15e-29	1.32e-27	55.8544	Down-Regulated
SCNN1B	-1.81322	9.52207	-11.9766	2.45e-29	1.49e-27	55.7247	Down-Regulated
PRDM16	-1.9827	7.15939	-11.8879	5.65e-29	3.39e-27	54.8979	Down-Regulated
NPC2	-1.11893	13.2435	-11.8827	5.93e-29	3.55e-27	54.8492	Down-Regulated
SCTR	-2.7146	6.67837	-11.8738	6.45e-29	3.84e-27	54.7665	Down-Regulated
NAPSA	-2.58171	13.789	-11.8677	6.83e-29	4.05e-27	54.7095	Down-Regulated
SLC22A3	-1.87988	8.63549	-11.8572	7.54e-29	4.45e-27	54.612	Down-Regulated
CTSH	-1.30576	12.7466	-11.8436	8.56e-29	5.04e-27	54.4859	Down-Regulated
FXYD1	-1.65954	4.63115	-11.7819	1.53e-28	8.93e-27	53.9132	Down-Regulated
RNASE1	-1.39808	12.9137	-11.7462	2.13e-28	1.23e-26	53.5832	Down-Regulated
TMPRSS2	-1.55705	10.5796	-11.7224	2.66e-28	1.53e-26	53.3625	Down-Regulated
SCN4B	-1.36565	6.33687	-11.6898	3.6e-28	2.04e-26	53.0619	Down-Regulated
ROBO2	-1.77132	5.82084	-11.6878	3.67e-28	2.08e-26	53.0435	Down-Regulated
FOLR1	-2.16286	10.4543	-11.6742	4.17e-28	2.35e-26	52.9178	Down-Regulated
CCDC48	-1.18895	5.77005	-11.548	1.34e-27	7.41e-26	51.7592	Down-Regulated
GPR116	-1.45365	11.6112	-11.5321	1.56e-27	8.52e-26	51.6133	Down-Regulated
INMT	-1.60792	8.30654	-11.4984	2.12e-27	1.15e-25	51.3058	Down-Regulated
DOK4	-1.07476	9.94601	-11.4806	2.5e-27	1.35e-25	51.1426	Down-Regulated
NR3C2	-1.29875	7.92219	-11.4545	3.18e-27	1.7e-25	50.9053	Down-Regulated
SPATA18	-1.667	6.90075	-11.4458	3.45e-27	1.83e-25	50.826	Down-Regulated
ATP1A2	-1.65048	4.44574	-11.4309	3.95e-27	2.1e-25	50.6906	Down-Regulated
SFTA1P	-2.12638	6.87013	-11.4059	4.97e-27	2.61e-25	50.4625	Down-Regulated
MGLL	-1.01543	11.7251	-11.3923	5.63e-27	2.95e-25	50.3393	Down-Regulated
PLLP	-1.28984	8.6138	-11.3828	6.15e-27	3.21e-25	50.2526	Down-Regulated
GFRA1	-1.83338	5.48793	-11.3762	6.53e-27	3.4e-25	50.1935	Down-Regulated
CD1C	-1.69264	5.86481	-11.336	9.44e-27	4.87e-25	49.8284	Down-Regulated
MGP	-1.14195	11.5753	-11.3172	1.12e-26	5.75e-25	49.6584	Down-Regulated
CLEC4F	-1.49603	2.70714	-11.2998	1.31e-26	6.68e-25	49.5015	Down-Regulated
ADAMTS8	-1.84191	5.41429	-11.2525	2.02e-26	1.01e-24	49.0746	Down-Regulated
CA3	-1.65356	4.71636	-11.2323	2.43e-26	1.21e-24	48.892	Down-Regulated
LTC4S	-1.1156	4.1126	-11.2235	2.63e-26	1.3e-24	48.813	Down-Regulated
SLFNL1	-1.39023	4.38928	-11.1999	3.26e-26	1.6e-24	48.601	Down-Regulated
DLC1	-1.20149	10.1354	-11.1219	6.61e-26	3.17e-24	47.9013	Down-Regulated
SCGB3A1	-3.13106	9.20313	-11.1213	6.65e-26	3.18e-24	47.8956	Down-Regulated
TMEM132E	-1.34801	3.40908	-11.0867	9.09e-26	4.27e-24	47.5863	Down-Regulated
BTNL9	-1.44016	5.83465	-11.0532	1.23e-25	5.75e-24	47.2869	Down-Regulated
C8orf34	-1.66064	4.34075	-10.9349	3.56e-25	1.6e-23	46.2359	Down-Regulated
CST5	-1.4663	2.1457	-10.9312	3.68e-25	1.65e-23	46.2032	Down-Regulated
CAPN3	-1.34384	6.96195	-10.8973	4.98e-25	2.22e-23	45.9032	Down-Regulated
GGTLC1	-2.23345	6.59539	-10.8607	6.9e-25	3.07e-23	45.5799	Down-Regulated
OLFM1	-1.47709	7.05663	-10.7761	1.46e-24	6.4e-23	44.8356	Down-Regulated
SCGB3A2	-3.08833	9.8287	-10.7222	2.36e-24	1.02e-22	44.3632	Down-Regulated
ABCC6	-1.24477	8.21481	-10.705	2.75e-24	1.18e-22	44.2123	Down-Regulated
VSIG2	-2.21773	7.27664	-10.6924	3.07e-24	1.31e-22	44.1024	Down-Regulated
MAMDC2	-1.65764	6.67035	-10.6829	3.34e-24	1.42e-22	44.0196	Down-Regulated
DAPK2	-1.00414	8.11297	-10.679	3.46e-24	1.47e-22	43.9856	Down-Regulated
DMRTC1B	-1.66103	3.34395	-10.6754	3.57e-24	1.51e-22	43.9538	Down-Regulated
TMEM132C	-1.52236	2.0509	-10.6626	3.99e-24	1.68e-22	43.8426	Down-Regulated
FMO5	-1.59358	9.17097	-10.6088	6.42e-24	2.66e-22	43.3739	Down-Regulated
MFAP4	-1.35222	10.2092	-10.6075	6.49e-24	2.68e-22	43.3627	Down-Regulated
CPAMD8	-1.69997	8.0993	-10.5887	7.65e-24	3.14e-22	43.1997	Down-Regulated
NAPSB	-1.17818	8.07617	-10.5758	8.57e-24	3.51e-22	43.0874	Down-Regulated
SHH	-1.5634	3.70138	-10.5603	9.81e-24	4e-22	42.9537	Down-Regulated
PXMP4	-1.0387	9.3231	-10.5226	1.36e-23	5.5e-22	42.6273	Down-Regulated
CHADL	-1.03552	5.79049	-10.5046	1.6e-23	6.42e-22	42.4713	Down-Regulated
C20orf56	-2.26201	6.77892	-10.4984	1.69e-23	6.76e-22	42.4181	Down-Regulated
ABCA8	-1.74432	6.05159	-10.4962	1.72e-23	6.88e-22	42.3989	Down-Regulated
HSD17B6	-1.54139	7.7389	-10.4924	1.78e-23	7.07e-22	42.3664	Down-Regulated
RAP1GAP	-1.41745	10.1674	-10.4839	1.91e-23	7.58e-22	42.2932	Down-Regulated
SFTPB	-2.5088	15.9054	-10.4799	1.98e-23	7.82e-22	42.2586	Down-Regulated
TNNI3K	-1.30865	3.23906	-10.4765	2.04e-23	8.03e-22	42.2294	Down-Regulated
LOC283174	-1.8477	6.05342	-10.4476	2.63e-23	1.01e-21	41.9801	Down-Regulated
NEIL1	-1.01096	6.71407	-10.4318	3.01e-23	1.16e-21	41.8443	Down-Regulated
FCGBP	-1.78729	9.8636	-10.4097	3.65e-23	1.4e-21	41.6541	Down-Regulated
PLA2G10	-1.92979	6.66342	-10.4064	3.75e-23	1.43e-21	41.6264	Down-Regulated
ADH1B	-2.38059	8.42524	-10.4043	3.82e-23	1.46e-21	41.6083	Down-Regulated
CDKL2	-1.5054	7.57027	-10.3945	4.16e-23	1.58e-21	41.5241	Down-Regulated
MUC1	-1.24574	13.9226	-10.394	4.18e-23	1.58e-21	41.5194	Down-Regulated
CD300LG	-1.56731	2.21281	-10.319	8e-23	2.99e-21	40.8783	Down-Regulated
KIAA2022	-1.73379	4.52213	-10.2977	9.62e-23	3.58e-21	40.6966	Down-Regulated
ST3GAL5	-1.10238	10.2465	-10.2878	1.05e-22	3.87e-21	40.6124	Down-Regulated
PLA2G4F	-1.56238	6.85154	-10.2819	1.1e-22	4.06e-21	40.5617	Down-Regulated
MALL	-1.189	12.3167	-10.2517	1.43e-22	5.19e-21	40.3052	Down-Regulated
ATP13A4	-2.07711	7.9357	-10.2389	1.59e-22	5.78e-21	40.1962	Down-Regulated
CX3CR1	-1.37531	5.96334	-10.1874	2.48e-22	8.77e-21	39.7592	Down-Regulated
PLA2G1B	-2.12928	4.14329	-10.1631	3.06e-22	1.07e-20	39.5536	Down-Regulated
PRICKLE4	-1.25067	6.66443	-10.1454	3.55e-22	1.23e-20	39.4047	Down-Regulated
ITIH5	-1.35049	7.68315	-10.1368	3.83e-22	1.32e-20	39.3315	Down-Regulated
SFTA2	-1.78846	10.4969	-10.1241	4.26e-22	1.46e-20	39.2245	Down-Regulated
PLAC9	-1.17525	5.36275	-10.1231	4.3e-22	1.47e-20	39.2164	Down-Regulated
RSPO2	-1.63412	3.39462	-10.0911	5.65e-22	1.92e-20	38.9468	Down-Regulated
CDH20	-1.36425	1.7938	-10.0768	6.37e-22	2.16e-20	38.8271	Down-Regulated
ADH1A	-1.36471	2.4546	-10.0654	7.02e-22	2.36e-20	38.7312	Down-Regulated
PEBP4	-2.38113	6.20586	-10.0398	8.72e-22	2.91e-20	38.5166	Down-Regulated
C1orf186	-1.28142	3.95481	-10.0376	8.9e-22	2.96e-20	38.4974	Down-Regulated
CD1A	-2.09435	5.80911	-10.0201	1.03e-21	3.39e-20	38.3512	Down-Regulated
HPGDS	-1.41764	5.59041	-10.0011	1.21e-21	3.96e-20	38.1921	Down-Regulated
KIAA0408	-2.45399	4.4371	-9.97248	1.54e-21	5.03e-20	37.9532	Down-Regulated
ELN	-1.34539	10.2843	-9.93638	2.09e-21	6.75e-20	37.6523	Down-Regulated
ESYT3	-1.35144	7.36992	-9.92337	2.33e-21	7.51e-20	37.5441	Down-Regulated
PNMA2	-1.32288	8.72372	-9.91328	2.54e-21	8.15e-20	37.4602	Down-Regulated
HLA-DQB2	-1.69135	8.74923	-9.91152	2.58e-21	8.26e-20	37.4456	Down-Regulated
SLC26A9	-2.02906	8.50494	-9.88944	3.1e-21	9.88e-20	37.2623	Down-Regulated
B3GNT8	-1.23179	8.02591	-9.8823	3.3e-21	1.05e-19	37.2031	Down-Regulated
CYP4Z2P	-1.145	1.48733	-9.88125	3.33e-21	1.05e-19	37.1944	Down-Regulated
C6orf138	-1.45187	3.92735	-9.85693	4.08e-21	1.28e-19	36.9929	Down-Regulated
GPRC5C	-1.13653	10.416	-9.8462	4.46e-21	1.39e-19	36.9041	Down-Regulated
TPPP	-1.30914	8.07336	-9.81423	5.83e-21	1.8e-19	36.6399	Down-Regulated
KCNQ1	-1.21016	8.96783	-9.80694	6.19e-21	1.91e-19	36.5798	Down-Regulated
C2orf40	-1.82513	3.82896	-9.78934	7.17e-21	2.19e-19	36.4346	Down-Regulated
CYP4X1	-1.56002	7.16953	-9.78345	7.54e-21	2.29e-19	36.3861	Down-Regulated
MAPK10	-1.24703	5.86262	-9.77046	8.4e-21	2.53e-19	36.2792	Down-Regulated
SFTPD	-2.14214	10.3811	-9.7431	1.05e-20	3.16e-19	36.0543	Down-Regulated
IRX5	-1.47915	7.66518	-9.73913	1.09e-20	3.25e-19	36.0217	Down-Regulated
CACNB1	-1.00991	8.09115	-9.7282	1.19e-20	3.56e-19	35.932	Down-Regulated
F11	-1.91067	2.88222	-9.70331	1.47e-20	4.34e-19	35.728	Down-Regulated
RHOBTB2	-1.00175	11.0055	-9.70175	1.49e-20	4.39e-19	35.7152	Down-Regulated
SFTA3	-1.86398	10.6231	-9.68331	1.73e-20	5.07e-19	35.5643	Down-Regulated
C17orf50	-1.03288	1.83293	-9.679	1.79e-20	5.25e-19	35.5291	Down-Regulated
ANKFN1	-1.54364	2.99074	-9.67214	1.9e-20	5.54e-19	35.4731	Down-Regulated
GPR133	-1.47533	8.52616	-9.67174	1.91e-20	5.55e-19	35.4697	Down-Regulated
CLU	-1.34172	12.1957	-9.66668	1.99e-20	5.78e-19	35.4284	Down-Regulated
ATP8A1	-1.05557	9.64444	-9.66548	2.01e-20	5.83e-19	35.4186	Down-Regulated
TBX4	-1.19087	7.02978	-9.63842	2.51e-20	7.22e-19	35.1978	Down-Regulated
MAP6	-1.0659	6.54645	-9.63137	2.66e-20	7.63e-19	35.1404	Down-Regulated
C21orf63	-1.0156	8.49942	-9.62425	2.82e-20	8.06e-19	35.0823	Down-Regulated
FIGF	-1.85913	5.0149	-9.61484	3.05e-20	8.69e-19	35.0058	Down-Regulated
DLEC1	-1.59437	5.11432	-9.60953	3.18e-20	9.07e-19	34.9626	Down-Regulated
EFCAB6	-1.10625	4.46627	-9.6049	3.31e-20	9.41e-19	34.9249	Down-Regulated
CAPN8	-1.69012	8.86661	-9.60256	3.37e-20	9.58e-19	34.9059	Down-Regulated
TMEM37	-1.0148	8.07951	-9.60205	3.39e-20	9.6e-19	34.9018	Down-Regulated
GAS2L2	-1.73043	4.11453	-9.60069	3.43e-20	9.7e-19	34.8907	Down-Regulated
PRG4	-1.83874	6.03419	-9.57571	4.21e-20	1.17e-18	34.6878	Down-Regulated
HOPX	-1.52223	11.7469	-9.56014	4.78e-20	1.33e-18	34.5615	Down-Regulated
FOXA2	-1.86634	8.11713	-9.55685	4.91e-20	1.36e-18	34.5349	Down-Regulated
WBSCR17	-1.3693	5.62199	-9.55074	5.16e-20	1.42e-18	34.4854	Down-Regulated
TMEM108	-1.26776	7.10878	-9.54372	5.47e-20	1.49e-18	34.4285	Down-Regulated
SOX8	-1.24434	3.72586	-9.54256	5.52e-20	1.51e-18	34.4192	Down-Regulated
ADHFE1	-1.16467	5.68846	-9.53617	5.82e-20	1.58e-18	34.3674	Down-Regulated
ENTPD3	-1.22157	7.70544	-9.53253	6e-20	1.62e-18	34.3379	Down-Regulated
GLOD5	-1.08633	4.19254	-9.51926	6.68e-20	1.8e-18	34.2307	Down-Regulated
RTN4RL1	-1.51438	5.51082	-9.51824	6.74e-20	1.81e-18	34.2225	Down-Regulated
CMAH	-1.02217	8.53969	-9.49918	7.88e-20	2.1e-18	34.0686	Down-Regulated
C4orf31	-1.53126	9.62404	-9.49027	8.47e-20	2.25e-18	33.9966	Down-Regulated
IGSF9B	-1.60869	4.56033	-9.47686	9.45e-20	2.49e-18	33.8886	Down-Regulated
MMP28	-1.78733	7.79585	-9.46188	1.07e-19	2.81e-18	33.768	Down-Regulated
SNTN	-1.90986	5.03941	-9.43392	1.34e-19	3.5e-18	33.5432	Down-Regulated
CRYM	-2.01115	7.39916	-9.42024	1.5e-19	3.89e-18	33.4335	Down-Regulated
ABO	-1.43145	6.23111	-9.41759	1.53e-19	3.97e-18	33.4121	Down-Regulated
C7	-1.74169	9.64818	-9.41736	1.53e-19	3.98e-18	33.4103	Down-Regulated
KCNK5	-1.11018	9.93096	-9.41376	1.58e-19	4.08e-18	33.3814	Down-Regulated
SLC15A2	-1.18003	8.39499	-9.39919	1.78e-19	4.55e-18	33.2647	Down-Regulated
LOC92973	-1.06786	4.31443	-9.39737	1.8e-19	4.61e-18	33.2501	Down-Regulated
OGN	-1.60821	5.59646	-9.39535	1.83e-19	4.68e-18	33.2339	Down-Regulated
IRX2	-1.99587	7.79327	-9.39526	1.84e-19	4.68e-18	33.2333	Down-Regulated
MYOC	-1.07858	1.47344	-9.3808	2.06e-19	5.24e-18	33.1175	Down-Regulated
IRX3	-1.20387	9.2453	-9.37963	2.08e-19	5.28e-18	33.1081	Down-Regulated
TNXB	-1.27282	8.84621	-9.37517	2.16e-19	5.46e-18	33.0725	Down-Regulated
ZMAT1	-1.11065	7.39391	-9.33833	2.91e-19	7.3e-18	32.7783	Down-Regulated
LEFTY2	-1.38251	3.47917	-9.33156	3.07e-19	7.7e-18	32.7244	Down-Regulated
SCN7A	-1.48295	6.60371	-9.31105	3.63e-19	9.03e-18	32.5611	Down-Regulated
SLC44A4	-1.32901	10.8211	-9.30128	3.92e-19	9.73e-18	32.4834	Down-Regulated
ALOX15B	-1.64848	9.14223	-9.30111	3.93e-19	9.73e-18	32.482	Down-Regulated
LRRK2	-1.63915	9.69161	-9.29435	4.15e-19	1.03e-17	32.4283	Down-Regulated
ZBTB7C	-1.37142	7.33291	-9.29191	4.23e-19	1.04e-17	32.4089	Down-Regulated
C5orf38	-1.74832	5.27349	-9.28977	4.31e-19	1.06e-17	32.3919	Down-Regulated
GJB1	-2.29936	6.85206	-9.27616	4.8e-19	1.18e-17	32.2839	Down-Regulated
AMY2B	-1.20032	7.17496	-9.27415	4.88e-19	1.2e-17	32.2679	Down-Regulated
NTRK3	-1.08229	3.11532	-9.26027	5.46e-19	1.33e-17	32.1579	Down-Regulated
GRIA1	-1.60904	3.48168	-9.22242	7.39e-19	1.76e-17	31.8584	Down-Regulated
AFF3	-1.38619	6.02579	-9.22159	7.44e-19	1.77e-17	31.8518	Down-Regulated
CLUL1	-1.40594	4.15637	-9.21988	7.55e-19	1.79e-17	31.8383	Down-Regulated
PLIN5	-1.20006	5.72997	-9.21434	7.89e-19	1.87e-17	31.7946	Down-Regulated
CASQ2	-1.27862	3.2527	-9.19335	9.33e-19	2.18e-17	31.6289	Down-Regulated
ITIH3	-1.00854	3.89251	-9.1914	9.48e-19	2.21e-17	31.6135	Down-Regulated
AHCYL2	-1.08918	11.2164	-9.18734	9.79e-19	2.28e-17	31.5816	Down-Regulated
PRR15L	-1.10749	9.76055	-9.1851	9.96e-19	2.31e-17	31.5639	Down-Regulated
AGR3	-2.02395	8.88072	-9.16612	1.16e-18	2.67e-17	31.4145	Down-Regulated
CHIA	-2.208	5.49862	-9.15652	1.25e-18	2.88e-17	31.339	Down-Regulated
EDA2R	-1.28468	5.16396	-9.14426	1.38e-18	3.16e-17	31.2426	Down-Regulated
SHE	-1.288	8.45963	-9.14092	1.42e-18	3.24e-17	31.2164	Down-Regulated
RICH2	-1.03143	8.38372	-9.13409	1.5e-18	3.4e-17	31.1628	Down-Regulated
MS4A2	-1.33504	5.70216	-9.12623	1.59e-18	3.61e-17	31.1011	Down-Regulated
ALPL	-1.59767	9.97297	-9.10539	1.88e-18	4.22e-17	30.9379	Down-Regulated
TCF21	-1.20281	6.91513	-9.10131	1.94e-18	4.35e-17	30.9059	Down-Regulated
SLC46A2	-1.56925	6.16574	-9.09988	1.96e-18	4.4e-17	30.8948	Down-Regulated
SLC16A11	-1.16735	4.68841	-9.08117	2.28e-18	5.07e-17	30.7484	Down-Regulated
LRRC36	-1.39952	4.59105	-9.0464	3e-18	6.58e-17	30.4771	Down-Regulated
LHFPL3	-1.51114	2.89892	-9.01204	3.93e-18	8.56e-17	30.2097	Down-Regulated
HPSE2	-1.04352	1.66671	-9.01018	3.99e-18	8.65e-17	30.1952	Down-Regulated
FAM189A2	-1.27792	6.92411	-9.00929	4.02e-18	8.69e-17	30.1883	Down-Regulated
MAOB	-1.04945	8.0673	-9.00379	4.2e-18	9.06e-17	30.1456	Down-Regulated
AQP3	-1.41703	12.5145	-8.98775	4.76e-18	1.02e-16	30.0211	Down-Regulated
SLC34A2	-1.55351	14.4331	-8.96515	5.69e-18	1.21e-16	29.846	Down-Regulated
CTSE	-2.27117	10.5256	-8.96157	5.85e-18	1.24e-16	29.8183	Down-Regulated
WFDC2	-1.23763	12.281	-8.94926	6.44e-18	1.36e-16	29.723	Down-Regulated
ROS1	-1.7456	9.27299	-8.93586	7.16e-18	1.5e-16	29.6195	Down-Regulated
SLC26A5	-1.19407	2.25246	-8.9197	8.12e-18	1.69e-16	29.4947	Down-Regulated
HOXD1	-1.72816	6.65161	-8.9167	8.31e-18	1.73e-16	29.4716	Down-Regulated
C6	-1.81134	4.17681	-8.90603	9.04e-18	1.87e-16	29.3893	Down-Regulated
RPL13AP17	-1.55933	2.44242	-8.90355	9.21e-18	1.9e-16	29.3703	Down-Regulated
ERBB4	-1.46879	4.74276	-8.90113	9.39e-18	1.94e-16	29.3516	Down-Regulated
C5orf49	-1.48677	5.35454	-8.89087	1.02e-17	2.09e-16	29.2727	Down-Regulated
FAM150B	-1.15396	2.83062	-8.88447	1.07e-17	2.19e-16	29.2234	Down-Regulated
POU2F3	-1.18495	6.43834	-8.86732	1.22e-17	2.49e-16	29.0916	Down-Regulated
LOC400794	-1.37253	2.21143	-8.85747	1.32e-17	2.67e-16	29.016	Down-Regulated
TPPP3	-1.21794	8.9016	-8.84672	1.43e-17	2.89e-16	28.9335	Down-Regulated
LOC644165	-1.09026	4.10025	-8.8372	1.54e-17	3.09e-16	28.8606	Down-Regulated
PDZD2	-1.0836	8.29894	-8.83356	1.59e-17	3.17e-16	28.8327	Down-Regulated
MYOCD	-1.26924	3.83745	-8.81565	1.83e-17	3.61e-16	28.6957	Down-Regulated
AQP1	-1.35968	12.3266	-8.81524	1.83e-17	3.62e-16	28.6925	Down-Regulated
NEGR1	-1.06927	5.81271	-8.81024	1.9e-17	3.75e-16	28.6543	Down-Regulated
C14orf64	-1.26873	4.1565	-8.80158	2.04e-17	4e-16	28.5881	Down-Regulated
NRGN	-1.25449	8.26341	-8.79702	2.11e-17	4.13e-16	28.5533	Down-Regulated
MYOZ1	-1.20486	4.38624	-8.79668	2.12e-17	4.13e-16	28.5507	Down-Regulated
DPCR1	-1.94536	5.75758	-8.79223	2.19e-17	4.27e-16	28.5168	Down-Regulated
C8orf79	-1.01903	5.16065	-8.79175	2.2e-17	4.28e-16	28.5131	Down-Regulated
HAS3	-1.39872	8.75459	-8.78334	2.35e-17	4.55e-16	28.4489	Down-Regulated
C10orf107	-1.52268	3.62794	-8.76027	2.8e-17	5.36e-16	28.2732	Down-Regulated
TMEM90A	-1.26508	3.10883	-8.75806	2.85e-17	5.44e-16	28.2563	Down-Regulated
SGCA	-1.22935	5.48179	-8.75322	2.96e-17	5.62e-16	28.2195	Down-Regulated
LRRC31	-1.97146	4.90818	-8.74543	3.14e-17	5.93e-16	28.1602	Down-Regulated
SLC4A4	-1.25907	8.7202	-8.74338	3.19e-17	6.02e-16	28.1447	Down-Regulated
COL4A3	-1.52646	7.60172	-8.74023	3.27e-17	6.16e-16	28.1207	Down-Regulated
CHRDL1	-1.47888	7.60646	-8.71857	3.87e-17	7.24e-16	27.9563	Down-Regulated
ACSM3	-1.13179	7.81114	-8.71057	4.11e-17	7.66e-16	27.8956	Down-Regulated
C4A	-1.04213	12.4812	-8.70641	4.25e-17	7.88e-16	27.8642	Down-Regulated
LOC648740	-1.07796	3.72313	-8.70424	4.32e-17	8e-16	27.8477	Down-Regulated
KLF15	-1.21429	6.57313	-8.68556	4.98e-17	9.15e-16	27.7063	Down-Regulated
PDE4C	-1.18616	6.18389	-8.68084	5.17e-17	9.46e-16	27.6706	Down-Regulated
HNF1B	-1.33114	8.68414	-8.67031	5.6e-17	1.02e-15	27.591	Down-Regulated
SFTPA1	-2.5923	12.9343	-8.65288	6.4e-17	1.16e-15	27.4594	Down-Regulated
GNMT	-1.05203	3.02065	-8.64688	6.7e-17	1.22e-15	27.4142	Down-Regulated
CD164L2	-1.26045	5.26219	-8.64533	6.78e-17	1.23e-15	27.4026	Down-Regulated
ITGA9	-1.02095	7.71781	-8.64305	6.9e-17	1.25e-15	27.3854	Down-Regulated
CASR	-1.67104	1.98875	-8.64267	6.92e-17	1.25e-15	27.3825	Down-Regulated
HPGD	-1.57929	9.90873	-8.64132	6.99e-17	1.26e-15	27.3723	Down-Regulated
AQP7	-1.54851	4.45193	-8.62186	8.12e-17	1.46e-15	27.2258	Down-Regulated
TDRD10	-1.47255	5.33057	-8.6149	8.56e-17	1.53e-15	27.1735	Down-Regulated
PGM5	-1.06483	6.97204	-8.61425	8.6e-17	1.54e-15	27.1686	Down-Regulated
ABCA3	-1.34374	11.4978	-8.61101	8.82e-17	1.57e-15	27.1443	Down-Regulated
TTC16	-1.13486	3.40132	-8.59274	1.01e-16	1.8e-15	27.0071	Down-Regulated
GRIN2A	-1.70619	3.07184	-8.56507	1.25e-16	2.2e-15	26.7997	Down-Regulated
C11orf92	-1.42741	7.1727	-8.55947	1.31e-16	2.29e-15	26.7578	Down-Regulated
NME5	-1.14739	5.19673	-8.54432	1.46e-16	2.56e-15	26.6445	Down-Regulated
PLD4	-1.188	6.03137	-8.53815	1.53e-16	2.68e-15	26.5985	Down-Regulated
THSD7B	-1.13477	3.38035	-8.52527	1.69e-16	2.94e-15	26.5024	Down-Regulated
ACOXL	-1.32969	4.80753	-8.47663	2.44e-16	4.16e-15	26.1404	Down-Regulated
LMO3	-1.60166	10.2577	-8.4715	2.54e-16	4.32e-15	26.1022	Down-Regulated
SLC5A9	-1.22767	3.86718	-8.46444	2.68e-16	4.55e-15	26.0499	Down-Regulated
KIF6	-1.21354	3.97655	-8.45078	2.97e-16	5.02e-15	25.9486	Down-Regulated
C10orf116	-1.23245	8.18017	-8.44338	3.14e-16	5.3e-15	25.8937	Down-Regulated
MBL1P	-1.12436	4.23982	-8.43868	3.25e-16	5.47e-15	25.859	Down-Regulated
ZSCAN4	-1.2376	1.89025	-8.41023	4.03e-16	6.72e-15	25.6487	Down-Regulated
RSPO1	-1.07244	2.81037	-8.37552	5.22e-16	8.59e-15	25.3928	Down-Regulated
TPSB2	-1.25726	9.11328	-8.37044	5.42e-16	8.89e-15	25.3555	Down-Regulated
CLIC3	-1.2102	7.65905	-8.36641	5.59e-16	9.15e-15	25.3258	Down-Regulated
PTPN13	-1.16961	9.74261	-8.36459	5.66e-16	9.27e-15	25.3125	Down-Regulated
PARM1	-1.04073	11.3885	-8.3633	5.72e-16	9.35e-15	25.3029	Down-Regulated
GATA5	-1.0413	3.54115	-8.35839	5.93e-16	9.65e-15	25.2669	Down-Regulated
SORCS2	-1.39043	7.71073	-8.31997	7.9e-16	1.26e-14	24.9851	Down-Regulated
LOC149620	-1.58044	2.20101	-8.31399	8.26e-16	1.32e-14	24.9413	Down-Regulated
NWD1	-1.7318	4.83814	-8.3053	8.81e-16	1.4e-14	24.8778	Down-Regulated
SFTPA2	-2.42137	14.0337	-8.29745	9.34e-16	1.48e-14	24.8203	Down-Regulated
DARC	-1.36983	7.16976	-8.29294	9.66e-16	1.52e-14	24.7874	Down-Regulated
ELANE	-1.20775	1.63501	-8.29266	9.68e-16	1.53e-14	24.7854	Down-Regulated
PCDH20	-1.63881	6.50767	-8.28865	9.97e-16	1.57e-14	24.7561	Down-Regulated
CLEC3B	-1.03185	7.56629	-8.28436	1.03e-15	1.62e-14	24.7248	Down-Regulated
RXRG	-1.39206	3.00358	-8.26536	1.18e-15	1.85e-14	24.5862	Down-Regulated
MYH11	-1.18244	10.3109	-8.25341	1.29e-15	2.01e-14	24.4992	Down-Regulated
C4BPA	-1.83925	10.6294	-8.2511	1.32e-15	2.04e-14	24.4824	Down-Regulated
TMEM130	-1.42568	7.07944	-8.24916	1.34e-15	2.07e-14	24.4682	Down-Regulated
SYT15	-1.12259	6.54859	-8.23611	1.47e-15	2.26e-14	24.3734	Down-Regulated
ACSM1	-1.04343	3.19351	-8.22836	1.56e-15	2.38e-14	24.3171	Down-Regulated
DAAM2	-1.02357	8.70004	-8.21258	1.75e-15	2.66e-14	24.2027	Down-Regulated
DUOXA1	-1.35862	6.67276	-8.20612	1.83e-15	2.78e-14	24.1558	Down-Regulated
PGC	-3.00971	9.11202	-8.20526	1.85e-15	2.79e-14	24.1496	Down-Regulated
CCL14	-1.19439	6.8783	-8.19629	1.97e-15	2.97e-14	24.0846	Down-Regulated
SCN1A	-1.50613	4.40937	-8.19141	2.04e-15	3.07e-14	24.0493	Down-Regulated
RIC3	-1.24504	4.53437	-8.1851	2.14e-15	3.2e-14	24.0037	Down-Regulated
RGS13	-1.05226	3.63687	-8.17554	2.3e-15	3.42e-14	23.9346	Down-Regulated
GGT3P	-1.03247	6.01839	-8.16808	2.43e-15	3.6e-14	23.8807	Down-Regulated
ZNF385B	-1.6471	6.44936	-8.15879	2.6e-15	3.84e-14	23.8137	Down-Regulated
FGFR2	-1.0697	8.35427	-8.15774	2.62e-15	3.87e-14	23.8061	Down-Regulated
MST1P9	-1.55982	7.18752	-8.15061	2.76e-15	4.06e-14	23.7547	Down-Regulated
SLC14A1	-1.0282	4.43111	-8.13761	3.03e-15	4.45e-14	23.6611	Down-Regulated
TPSAB1	-1.14708	8.44689	-8.13032	3.2e-15	4.69e-14	23.6085	Down-Regulated
PRMT8	-1.57521	3.16106	-8.12683	3.28e-15	4.8e-14	23.5835	Down-Regulated
CYP4Z1	-1.10586	1.9528	-8.11089	3.69e-15	5.37e-14	23.4689	Down-Regulated
KNDC1	-1.54151	6.63341	-8.09232	4.22e-15	6.11e-14	23.3357	Down-Regulated
MYBPHL	-1.82091	4.17678	-8.08262	4.53e-15	6.53e-14	23.2662	Down-Regulated
NKX2-1	-1.42664	10.9611	-8.06868	5.02e-15	7.18e-14	23.1664	Down-Regulated
SEC14L3	-1.2494	1.51991	-8.05004	5.74e-15	8.17e-14	23.0333	Down-Regulated
GPD1	-1.30697	5.34719	-8.04417	5.99e-15	8.51e-14	22.9914	Down-Regulated
PPP1R1B	-1.91656	8.67142	-8.03016	6.63e-15	9.37e-14	22.8915	Down-Regulated
WNT11	-1.09248	4.75708	-8.02828	6.72e-15	9.48e-14	22.8781	Down-Regulated
SPINK5	-1.78235	6.75292	-8.02675	6.8e-15	9.57e-14	22.8672	Down-Regulated
SCUBE2	-1.34335	7.37323	-8.02218	7.03e-15	9.86e-14	22.8347	Down-Regulated
GGT6	-1.739	6.67125	-8.01407	7.45e-15	1.04e-13	22.7769	Down-Regulated
TMEM232	-1.29186	3.15703	-8.0073	7.83e-15	1.09e-13	22.7288	Down-Regulated
HABP2	-1.89238	7.30185	-7.99922	8.3e-15	1.15e-13	22.6714	Down-Regulated
GDF10	-1.28796	4.91829	-7.99241	8.72e-15	1.21e-13	22.623	Down-Regulated
CD1B	-1.28951	3.37125	-7.9292	1.37e-14	1.86e-13	22.1757	Down-Regulated
AMY2A	-1.28488	3.31038	-7.92648	1.4e-14	1.9e-13	22.1565	Down-Regulated
ENAM	-1.53812	3.3064	-7.89595	1.74e-14	2.33e-13	21.9415	Down-Regulated
ABI3BP	-1.0627	8.30146	-7.89054	1.81e-14	2.41e-13	21.9035	Down-Regulated
SUSD4	-1.19581	7.46852	-7.88243	1.92e-14	2.55e-13	21.8465	Down-Regulated
B3GALT2	-1.16701	4.59363	-7.86891	2.11e-14	2.79e-13	21.7516	Down-Regulated
IL33	-1.01395	8.33281	-7.83961	2.61e-14	3.39e-13	21.5464	Down-Regulated
AQP4	-1.99377	9.07747	-7.83327	2.73e-14	3.53e-13	21.5021	Down-Regulated
FCAMR	-1.02715	2.28693	-7.83081	2.77e-14	3.59e-13	21.4849	Down-Regulated
KCNK17	-1.14726	4.38897	-7.82294	2.93e-14	3.78e-13	21.43	Down-Regulated
SPTLC3	-1.07689	7.51486	-7.81328	3.14e-14	4.04e-13	21.3625	Down-Regulated
TEPP	-1.41948	2.63544	-7.80929	3.23e-14	4.15e-13	21.3347	Down-Regulated
DUOX1	-1.34035	8.54273	-7.80571	3.32e-14	4.24e-13	21.3098	Down-Regulated
C1orf88	-1.15374	7.52607	-7.80525	3.33e-14	4.25e-13	21.3066	Down-Regulated
ATOH8	-1.33226	8.36981	-7.80452	3.34e-14	4.27e-13	21.3015	Down-Regulated
IRX6	-1.66151	4.37585	-7.78639	3.8e-14	4.81e-13	21.1753	Down-Regulated
EVPLL	-1.30529	5.10409	-7.7827	3.9e-14	4.92e-13	21.1496	Down-Regulated
C9orf152	-1.19957	8.29572	-7.76235	4.51e-14	5.64e-13	21.0083	Down-Regulated
IRX1	-1.6519	3.35163	-7.75802	4.65e-14	5.79e-13	20.9783	Down-Regulated
LRRC48	-1.0431	5.0018	-7.75345	4.8e-14	5.97e-13	20.9465	Down-Regulated
VWA2	-1.04565	8.08346	-7.7471	5.02e-14	6.22e-13	20.9026	Down-Regulated
S100B	-1.18725	6.75743	-7.73229	5.57e-14	6.86e-13	20.8	Down-Regulated
PHYHD1	-1.22149	7.51259	-7.7177	6.17e-14	7.57e-13	20.6992	Down-Regulated
SLPI	-1.40403	11.6509	-7.70756	6.63e-14	8.11e-13	20.6292	Down-Regulated
RASGRF1	-1.43514	6.78365	-7.70675	6.67e-14	8.15e-13	20.6236	Down-Regulated
CEACAM8	-1.22107	1.44309	-7.7059	6.71e-14	8.19e-13	20.6177	Down-Regulated
LOC100130933	-1.11092	5.36925	-7.69645	7.17e-14	8.71e-13	20.5526	Down-Regulated
LUZP2	-1.27955	3.02211	-7.6655	8.9e-14	1.07e-12	20.3397	Down-Regulated
PRODH	-1.53586	9.66958	-7.66435	8.97e-14	1.08e-12	20.3318	Down-Regulated
COL4A4	-1.02913	8.57434	-7.64984	9.93e-14	1.19e-12	20.2322	Down-Regulated
ADRA2A	-1.30988	7.14075	-7.64142	1.05e-13	1.26e-12	20.1744	Down-Regulated
ALDOB	-1.36793	3.07548	-7.61636	1.25e-13	1.5e-12	20.003	Down-Regulated
GKN2	-2.06693	4.54677	-7.60805	1.33e-13	1.58e-12	19.9462	Down-Regulated
SCNN1G	-1.2864	7.28735	-7.60303	1.38e-13	1.63e-12	19.9119	Down-Regulated
LANCL3	-1.13392	3.23887	-7.58887	1.52e-13	1.79e-12	19.8153	Down-Regulated
BCL2L15	-1.18428	7.51418	-7.58764	1.53e-13	1.81e-12	19.8069	Down-Regulated
DNAI2	-1.56286	2.77393	-7.58192	1.59e-13	1.87e-12	19.768	Down-Regulated
VWA3A	-1.51961	3.23741	-7.57911	1.62e-13	1.91e-12	19.7489	Down-Regulated
BNIPL	-1.34915	6.76034	-7.57462	1.68e-13	1.96e-12	19.7183	Down-Regulated
MFSD4	-1.36349	8.91162	-7.54366	2.08e-13	2.4e-12	19.508	Down-Regulated
CLDN2	-2.06465	6.84269	-7.53825	2.16e-13	2.48e-12	19.4713	Down-Regulated
BMP3	-1.48805	7.86171	-7.5372	2.17e-13	2.5e-12	19.4642	Down-Regulated
FAM167A	-1.09161	7.22062	-7.53276	2.24e-13	2.57e-12	19.4341	Down-Regulated
SLC18A2	-1.15195	4.12878	-7.52909	2.3e-13	2.64e-12	19.4093	Down-Regulated
DMBT1	-2.125	9.55159	-7.52058	2.44e-13	2.79e-12	19.3517	Down-Regulated
ACADL	-1.38653	4.53787	-7.51162	2.59e-13	2.95e-12	19.291	Down-Regulated
CYS1	-1.08739	6.04716	-7.49767	2.85e-13	3.24e-12	19.1968	Down-Regulated
ICAM5	-1.14167	6.53664	-7.48833	3.04e-13	3.44e-12	19.1338	Down-Regulated
C9orf135	-1.65596	3.35734	-7.48303	3.15e-13	3.55e-12	19.0981	Down-Regulated
C6orf97	-1.02544	6.41773	-7.48097	3.2e-13	3.6e-12	19.0843	Down-Regulated
SULT1C2	-1.33583	6.81699	-7.47591	3.31e-13	3.71e-12	19.0502	Down-Regulated
PTPRT	-1.63284	3.76566	-7.4615	3.65e-13	4.09e-12	18.9532	Down-Regulated
ZBTB16	-1.38149	4.87771	-7.44645	4.05e-13	4.49e-12	18.8521	Down-Regulated
LGR6	-1.2792	5.68612	-7.43561	4.36e-13	4.82e-12	18.7794	Down-Regulated
CTSG	-1.21655	3.62198	-7.42693	4.63e-13	5.08e-12	18.7212	Down-Regulated
RSPH1	-1.16894	6.14895	-7.42283	4.76e-13	5.22e-12	18.6938	Down-Regulated
AQP5	-2.17303	7.61917	-7.41383	5.06e-13	5.52e-12	18.6336	Down-Regulated
KIF12	-1.37875	6.44321	-7.40462	5.39e-13	5.86e-12	18.572	Down-Regulated
NTRK2	-1.18957	5.49841	-7.39212	5.87e-13	6.34e-12	18.4885	Down-Regulated
GLB1L3	-2.22904	4.63966	-7.38707	6.07e-13	6.54e-12	18.4548	Down-Regulated
MS4A8B	-1.90111	4.66316	-7.38503	6.16e-13	6.61e-12	18.4413	Down-Regulated
WDR65	-1.14334	3.05136	-7.37084	6.78e-13	7.25e-12	18.3467	Down-Regulated
KLHDC7A	-1.20105	7.17574	-7.3679	6.92e-13	7.38e-12	18.3271	Down-Regulated
COL21A1	-1.19085	6.71459	-7.36182	7.21e-13	7.66e-12	18.2867	Down-Regulated
MEGF11	-1.44376	3.11955	-7.35471	7.57e-13	8.01e-12	18.2395	Down-Regulated
FAM184A	-1.00405	6.90857	-7.35342	7.63e-13	8.07e-12	18.2309	Down-Regulated
PCP4L1	-1.62066	7.23032	-7.33845	8.45e-13	8.87e-12	18.1315	Down-Regulated
CACNA1D	-1.10741	7.0586	-7.33393	8.71e-13	9.13e-12	18.1015	Down-Regulated
DYNLRB2	-1.18868	2.84329	-7.3242	9.3e-13	9.72e-12	18.0371	Down-Regulated
CACHD1	-1.01834	8.07958	-7.31178	1.01e-12	1.05e-11	17.9549	Down-Regulated
IGFALS	-1.17356	4.46455	-7.30729	1.04e-12	1.08e-11	17.9251	Down-Regulated
HLA-DRB5	-1.10673	11.3314	-7.29615	1.12e-12	1.16e-11	17.8515	Down-Regulated
IHH	-1.31491	2.80169	-7.2948	1.13e-12	1.17e-11	17.8427	Down-Regulated
AQP2	-1.0106	1.61002	-7.28906	1.18e-12	1.21e-11	17.8048	Down-Regulated
CASC1	-1.09104	4.17071	-7.28515	1.21e-12	1.24e-11	17.779	Down-Regulated
SERPIND1	-1.76583	5.52019	-7.27906	1.26e-12	1.29e-11	17.7389	Down-Regulated
CRTAC1	-1.51741	7.61713	-7.26428	1.39e-12	1.42e-11	17.6415	Down-Regulated
C13orf30	-1.63298	4.62297	-7.26052	1.43e-12	1.45e-11	17.6168	Down-Regulated
PI16	-1.18039	3.08898	-7.25783	1.45e-12	1.48e-11	17.5991	Down-Regulated
DLX3	-1.27748	5.31133	-7.25192	1.51e-12	1.53e-11	17.5603	Down-Regulated
CNGA4	-1.09096	2.90688	-7.24891	1.54e-12	1.56e-11	17.5405	Down-Regulated
CXCL17	-1.27976	11.597	-7.24203	1.62e-12	1.63e-11	17.4953	Down-Regulated
AMY1A	-1.69279	8.32056	-7.23889	1.65e-12	1.67e-11	17.4747	Down-Regulated
RGS22	-1.20761	3.53877	-7.2334	1.71e-12	1.72e-11	17.4387	Down-Regulated
GALNTL1	-1.04989	4.40343	-7.22117	1.86e-12	1.86e-11	17.3586	Down-Regulated
SORBS2	-1.02534	8.9293	-7.21114	1.99e-12	1.98e-11	17.293	Down-Regulated
CFTR	-1.53873	7.05528	-7.20454	2.08e-12	2.06e-11	17.2498	Down-Regulated
SYBU	-1.02179	8.25067	-7.19396	2.23e-12	2.2e-11	17.1807	Down-Regulated
HSD17B13	-1.22203	3.86498	-7.17595	2.51e-12	2.46e-11	17.0633	Down-Regulated
WIF1	-1.91587	6.159	-7.17122	2.59e-12	2.54e-11	17.0325	Down-Regulated
B3GAT1	-1.37033	5.04944	-7.16576	2.69e-12	2.62e-11	16.997	Down-Regulated
SCGB2A1	-1.55436	3.43606	-7.16433	2.71e-12	2.65e-11	16.9877	Down-Regulated
AZU1	-1.12467	1.93667	-7.16139	2.77e-12	2.69e-11	16.9685	Down-Regulated
ZNF750	-1.31789	7.21732	-7.15768	2.84e-12	2.76e-11	16.9445	Down-Regulated
ZDHHC8P1	-1.04629	4.65771	-7.1382	3.23e-12	3.12e-11	16.818	Down-Regulated
MACROD2	-1.27069	7.25372	-7.12954	3.42e-12	3.29e-11	16.7619	Down-Regulated
FOXQ1	-1.44117	8.08802	-7.11719	3.71e-12	3.55e-11	16.6819	Down-Regulated
HHIP	-1.66071	5.30027	-7.08794	4.5e-12	4.24e-11	16.493	Down-Regulated
PLCXD3	-1.21067	4.75973	-7.0844	4.6e-12	4.33e-11	16.4701	Down-Regulated
MUC21	-1.99649	8.77438	-7.08333	4.63e-12	4.36e-11	16.4632	Down-Regulated
LRRC18	-1.02826	2.34969	-7.07784	4.8e-12	4.51e-11	16.4279	Down-Regulated
LRRC52	-1.00484	1.81407	-7.07331	4.95e-12	4.64e-11	16.3987	Down-Regulated
FAM154B	-1.22837	4.71688	-7.04083	6.12e-12	5.68e-11	16.1901	Down-Regulated
CPB2	-1.7017	4.12206	-7.03806	6.24e-12	5.78e-11	16.1723	Down-Regulated
PRSS12	-1.31422	6.40601	-7.0237	6.85e-12	6.31e-11	16.0803	Down-Regulated
DNAJB13	-1.16819	5.43707	-7.02052	6.99e-12	6.43e-11	16.06	Down-Regulated
FAM3D	-1.48183	4.53598	-7.0058	7.7e-12	7.04e-11	15.9659	Down-Regulated
C1orf87	-1.4388	2.66382	-7.00387	7.8e-12	7.12e-11	15.9535	Down-Regulated
SCGB1A1	-2.45486	7.47765	-7.00172	7.91e-12	7.21e-11	15.9398	Down-Regulated
CCDC108	-1.32945	4.15148	-6.9801	9.1e-12	8.24e-11	15.802	Down-Regulated
C1orf158	-1.23884	2.08557	-6.96303	1.02e-11	9.17e-11	15.6934	Down-Regulated
PENK	-1.35223	3.58925	-6.93398	1.23e-11	1.1e-10	15.5092	Down-Regulated
GPIHBP1	-1.00017	5.26945	-6.92691	1.29e-11	1.14e-10	15.4644	Down-Regulated
C6orf103	-1.14041	1.87253	-6.88955	1.64e-11	1.44e-10	15.2286	Down-Regulated
CCL17	-1.23065	4.73513	-6.87994	1.74e-11	1.53e-10	15.1681	Down-Regulated
DNAH9	-1.6348	4.11171	-6.87915	1.75e-11	1.53e-10	15.1632	Down-Regulated
CPA3	-1.11838	8.0963	-6.87356	1.81e-11	1.58e-10	15.128	Down-Regulated
EFHB	-1.09821	3.63168	-6.8631	1.94e-11	1.68e-10	15.0623	Down-Regulated
AGER	-1.40222	8.64653	-6.85967	1.98e-11	1.72e-10	15.0408	Down-Regulated
DPP4	-1.17418	10.4998	-6.8587	1.99e-11	1.72e-10	15.0347	Down-Regulated
TEKT1	-1.63007	3.52941	-6.83975	2.25e-11	1.93e-10	14.9159	Down-Regulated
TRPV6	-1.19052	3.02183	-6.82703	2.44e-11	2.09e-10	14.8363	Down-Regulated
TUBA4B	-1.33275	3.21756	-6.82623	2.45e-11	2.1e-10	14.8314	Down-Regulated
CHAD	-1.10317	4.53218	-6.79962	2.91e-11	2.46e-10	14.6653	Down-Regulated
DNAH6	-1.12692	4.58919	-6.78989	3.09e-11	2.6e-10	14.6047	Down-Regulated
LPL	-1.09213	9.03991	-6.77855	3.33e-11	2.78e-10	14.5342	Down-Regulated
PLCH2	-1.03976	5.96093	-6.74751	4.05e-11	3.34e-10	14.3417	Down-Regulated
CXCL14	-1.63718	9.24238	-6.74723	4.06e-11	3.35e-10	14.34	Down-Regulated
SHISA3	-1.61809	5.73934	-6.73677	4.33e-11	3.56e-10	14.2753	Down-Regulated
C11orf88	-1.43093	3.28665	-6.73556	4.37e-11	3.58e-10	14.2678	Down-Regulated
CLDN18	-2.04375	7.39488	-6.71194	5.07e-11	4.12e-10	14.122	Down-Regulated
SFTPC	-2.61145	10.4051	-6.70653	5.25e-11	4.25e-10	14.0887	Down-Regulated
CDHR3	-1.55352	5.75474	-6.69816	5.53e-11	4.46e-10	14.0372	Down-Regulated
C11orf16	-1.26053	3.5112	-6.68096	6.16e-11	4.94e-10	13.9315	Down-Regulated
DES	-1.16491	6.6944	-6.6607	7e-11	5.56e-10	13.8072	Down-Regulated
CNR1	-1.03449	5.99451	-6.6578	7.12e-11	5.65e-10	13.7895	Down-Regulated
GPR64	-1.00176	5.21078	-6.65215	7.38e-11	5.84e-10	13.755	Down-Regulated
SOSTDC1	-1.41381	3.76005	-6.64821	7.57e-11	5.98e-10	13.7309	Down-Regulated
CLIC5	-1.03263	8.48192	-6.64803	7.57e-11	5.98e-10	13.7297	Down-Regulated
GPR12	-1.0411	1.3634	-6.64513	7.71e-11	6.08e-10	13.7121	Down-Regulated
ADCY2	-1.00167	3.25426	-6.6406	7.93e-11	6.24e-10	13.6843	Down-Regulated
TTLL10	-1.06434	2.97402	-6.633	8.32e-11	6.5e-10	13.638	Down-Regulated
CCDC60	-1.19054	2.20591	-6.61833	9.12e-11	7.09e-10	13.5485	Down-Regulated
SLC1A7	-1.71617	6.32355	-6.61253	9.45e-11	7.33e-10	13.5133	Down-Regulated
TNNC1	-1.1014	5.94191	-6.59651	1.04e-10	8.06e-10	13.4159	Down-Regulated
FAM81B	-1.2387	4.81186	-6.59238	1.07e-10	8.26e-10	13.3908	Down-Regulated
CAPN6	-1.54245	4.58471	-6.58291	1.14e-10	8.72e-10	13.3333	Down-Regulated
FGFR3	-1.15422	8.42196	-6.58015	1.16e-10	8.86e-10	13.3166	Down-Regulated
TMEM100	-1.08532	6.15618	-6.57377	1.2e-10	9.18e-10	13.278	Down-Regulated
ICAM4	-1.05403	6.98705	-6.57359	1.2e-10	9.19e-10	13.2768	Down-Regulated
C20orf85	-1.77344	4.35654	-6.55257	1.37e-10	1.04e-09	13.1497	Down-Regulated
TMEM27	-1.04984	5.7725	-6.53837	1.5e-10	1.13e-09	13.0641	Down-Regulated
CCDC42B	-1.08818	3.87243	-6.49295	1.98e-10	1.46e-09	12.7911	Down-Regulated
MST1P2	-1.03292	7.12099	-6.48413	2.09e-10	1.54e-09	12.7383	Down-Regulated
EFCAB1	-1.33481	4.41709	-6.47026	2.28e-10	1.67e-09	12.6554	Down-Regulated
DRD1	-1.07897	3.01702	-6.45682	2.47e-10	1.8e-09	12.5751	Down-Regulated
C6orf118	-1.21408	2.39845	-6.45189	2.55e-10	1.85e-09	12.5457	Down-Regulated
POU5F1	-1.06738	3.59378	-6.44613	2.64e-10	1.91e-09	12.5114	Down-Regulated
THBS4	-1.33298	5.77824	-6.43392	2.84e-10	2.05e-09	12.4387	Down-Regulated
C1orf92	-1.20937	2.20831	-6.42641	2.97e-10	2.14e-09	12.3941	Down-Regulated
DNAH10	-1.01613	5.20303	-6.42343	3.03e-10	2.18e-09	12.3764	Down-Regulated
NXF3	-1.04614	2.14563	-6.4005	3.48e-10	2.48e-09	12.2404	Down-Regulated
RRAD	-1.01019	8.2059	-6.39214	3.66e-10	2.6e-09	12.191	Down-Regulated
DCDC2B	-1.17658	2.13032	-6.38748	3.77e-10	2.67e-09	12.1635	Down-Regulated
IL1F7	-1.75327	3.70753	-6.3821	3.89e-10	2.75e-09	12.1317	Down-Regulated
OCA2	-1.08074	2.51123	-6.37751	4e-10	2.83e-09	12.1046	Down-Regulated
PDZK1IP1	-1.01792	9.89779	-6.36891	4.22e-10	2.97e-09	12.0538	Down-Regulated
TCTE1	-1.00132	2.03687	-6.35913	4.47e-10	3.13e-09	11.9963	Down-Regulated
APOD	-1.14682	8.88522	-6.34625	4.83e-10	3.37e-09	11.9205	Down-Regulated
STK32A	-1.03011	6.0373	-6.34195	4.96e-10	3.45e-09	11.8952	Down-Regulated
APOBEC4	-1.17271	2.55778	-6.33149	5.28e-10	3.66e-09	11.8339	Down-Regulated
KCNJ15	-1.04576	8.4832	-6.32899	5.36e-10	3.71e-09	11.8192	Down-Regulated
ZMYND10	-1.17145	5.90727	-6.31773	5.74e-10	3.95e-09	11.7532	Down-Regulated
TYRP1	-1.0121	4.44648	-6.30703	6.12e-10	4.19e-09	11.6906	Down-Regulated
CCDC37	-1.20424	2.3327	-6.29204	6.69e-10	4.56e-09	11.6031	Down-Regulated
CDHR4	-1.37948	3.21685	-6.28909	6.81e-10	4.63e-09	11.5858	Down-Regulated
MS4A15	-1.652	5.77963	-6.28361	7.04e-10	4.77e-09	11.5539	Down-Regulated
LGALS4	-1.92031	4.90781	-6.28348	7.04e-10	4.77e-09	11.5532	Down-Regulated
C9orf171	-1.23865	2.80918	-6.28211	7.1e-10	4.81e-09	11.5452	Down-Regulated
LGI3	-1.46122	4.20665	-6.27956	7.21e-10	4.88e-09	11.5303	Down-Regulated
PACRG	-1.01786	2.93325	-6.27869	7.25e-10	4.9e-09	11.5253	Down-Regulated
DUOXA2	-1.06916	4.0483	-6.27132	7.58e-10	5.1e-09	11.4824	Down-Regulated
LOC150622	-1.04306	1.91854	-6.27037	7.62e-10	5.13e-09	11.4768	Down-Regulated
C1orf173	-1.45238	4.06543	-6.26712	7.77e-10	5.23e-09	11.458	Down-Regulated
DUOX2	-1.25255	5.99697	-6.24479	8.87e-10	5.91e-09	11.3283	Down-Regulated
C7orf57	-1.06464	4.42384	-6.23118	9.62e-10	6.39e-09	11.2495	Down-Regulated
CA10	-1.53331	2.37725	-6.21542	1.06e-09	6.98e-09	11.1584	Down-Regulated
CXorf41	-1.065	1.86277	-6.20484	1.12e-09	7.4e-09	11.0974	Down-Regulated
FCER2	-1.02228	3.16203	-6.19175	1.21e-09	7.96e-09	11.022	Down-Regulated
STOML3	-1.27397	2.93967	-6.16135	1.45e-09	9.4e-09	10.8475	Down-Regulated
ADH1C	-1.56586	5.61504	-6.15692	1.49e-09	9.63e-09	10.8221	Down-Regulated
DNAH12	-1.1933	3.37848	-6.15046	1.55e-09	9.98e-09	10.7851	Down-Regulated
COL29A1	-1.02677	5.44762	-6.14768	1.58e-09	1.01e-08	10.7692	Down-Regulated
CDH15	-1.0539	5.35088	-6.14748	1.58e-09	1.01e-08	10.7681	Down-Regulated
LOC400891	-1.04813	1.75163	-6.14548	1.6e-09	1.03e-08	10.7566	Down-Regulated
FREM2	-1.11976	7.43452	-6.12995	1.75e-09	1.12e-08	10.668	Down-Regulated
TMEM212	-1.03751	1.90173	-6.1275	1.77e-09	1.13e-08	10.654	Down-Regulated
SYT8	-1.30981	5.75904	-6.12526	1.8e-09	1.15e-08	10.6412	Down-Regulated
LPPR1	-1.26251	5.29495	-6.11179	1.94e-09	1.23e-08	10.5645	Down-Regulated
HCN4	-1.15472	3.09441	-6.11149	1.95e-09	1.23e-08	10.5628	Down-Regulated
MAPK15	-1.03398	6.13968	-6.10619	2.01e-09	1.27e-08	10.5326	Down-Regulated
CNTN3	-1.0063	4.77838	-6.1054	2.02e-09	1.27e-08	10.5281	Down-Regulated
ADRB1	-1.00652	5.09076	-6.09714	2.12e-09	1.33e-08	10.4812	Down-Regulated
LEMD1	-1.18201	4.34996	-6.0958	2.13e-09	1.34e-08	10.4736	Down-Regulated
DIO1	-1.09741	3.18568	-6.08997	2.21e-09	1.38e-08	10.4405	Down-Regulated
PAX7	-1.84456	2.89538	-6.03982	2.95e-09	1.82e-08	10.1571	Down-Regulated
LOC100287718	-1.03347	1.77932	-6.02131	3.29e-09	2.01e-08	10.053	Down-Regulated
FGF9	-1.1032	4.33186	-6.01768	3.36e-09	2.05e-08	10.0326	Down-Regulated
C9orf24	-1.22963	4.33987	-6.01419	3.43e-09	2.09e-08	10.013	Down-Regulated
WDR16	-1.16857	3.32951	-6.00851	3.54e-09	2.15e-08	9.98115	Down-Regulated
CHIT1	-1.27934	8.97506	-5.99715	3.78e-09	2.29e-08	9.91751	Down-Regulated
LRRC50	-1.05613	4.37754	-5.9855	4.04e-09	2.44e-08	9.85238	Down-Regulated
RGS6	-1.01319	2.54337	-5.95694	4.76e-09	2.84e-08	9.69314	Down-Regulated
SHISA2	-1.13113	6.78045	-5.93708	5.33e-09	3.16e-08	9.58282	Down-Regulated
COL6A6	-1.04019	6.01052	-5.91632	6e-09	3.54e-08	9.4678	Down-Regulated
CLIC6	-1.06552	10.6877	-5.90181	6.52e-09	3.82e-08	9.38762	Down-Regulated
TMEM132D	-1.28067	3.27838	-5.90135	6.53e-09	3.83e-08	9.38508	Down-Regulated
CNTN6	-1.08928	2.88707	-5.89808	6.66e-09	3.9e-08	9.36703	Down-Regulated
UCN3	-1.30707	2.98034	-5.89796	6.66e-09	3.9e-08	9.36635	Down-Regulated
ERN2	-1.74614	5.96954	-5.88311	7.25e-09	4.23e-08	9.28453	Down-Regulated
LOC284578	-1.11781	4.97253	-5.86982	7.81e-09	4.54e-08	9.21146	Down-Regulated
CAPN9	-1.24434	5.68509	-5.85129	8.67e-09	5e-08	9.10982	Down-Regulated
HHLA2	-1.75667	5.71887	-5.83277	9.63e-09	5.52e-08	9.0085	Down-Regulated
PLA2G12B	-1.31398	3.81036	-5.81432	1.07e-08	6.09e-08	8.90785	Down-Regulated
FAM183A	-1.08177	3.58734	-5.79055	1.22e-08	6.91e-08	8.77861	Down-Regulated
ALPPL2	-1.34477	3.17256	-5.78617	1.25e-08	7.07e-08	8.75483	Down-Regulated
PCSK2	-1.84127	4.03513	-5.7706	1.36e-08	7.65e-08	8.67049	Down-Regulated
RETN	-1.08024	3.31012	-5.74948	1.53e-08	8.55e-08	8.55635	Down-Regulated
CAPSL	-1.24391	3.2584	-5.73656	1.65e-08	9.14e-08	8.48673	Down-Regulated
ELFN2	-1.11749	7.21446	-5.7138	1.87e-08	1.03e-07	8.3644	Down-Regulated
CYP2A6	-1.07117	2.16753	-5.71267	1.88e-08	1.03e-07	8.35832	Down-Regulated
AMN	-1.05638	5.49654	-5.70076	2.01e-08	1.1e-07	8.29453	Down-Regulated
HMGCS2	-1.38643	2.83733	-5.67366	2.33e-08	1.26e-07	8.1497	Down-Regulated
YSK4	-1.11294	3.1355	-5.67332	2.34e-08	1.27e-07	8.14793	Down-Regulated
TMEM213	-1.19429	4.31933	-5.66617	2.43e-08	1.32e-07	8.10979	Down-Regulated
CYP4F12	-1.04956	3.38541	-5.65138	2.64e-08	1.42e-07	8.03112	Down-Regulated
TMED6	-1.12754	4.47876	-5.64566	2.72e-08	1.46e-07	8.00076	Down-Regulated
TMEM190	-1.27195	3.10165	-5.62233	3.09e-08	1.65e-07	7.87712	Down-Regulated
DNAI1	-1.14478	3.36556	-5.61384	3.24e-08	1.72e-07	7.83226	Down-Regulated
TTC29	-1.08959	2.24513	-5.61236	3.26e-08	1.73e-07	7.82445	Down-Regulated
AADAC	-1.21672	4.30869	-5.60259	3.44e-08	1.82e-07	7.77289	Down-Regulated
NR0B2	-1.30216	4.41456	-5.58542	3.78e-08	1.98e-07	7.68251	Down-Regulated
VWA3B	-1.04392	4.61482	-5.57003	4.1e-08	2.14e-07	7.60167	Down-Regulated
RSPH4A	-1.01117	4.86656	-5.56501	4.22e-08	2.2e-07	7.57533	Down-Regulated
CEACAM6	-1.03123	14.3237	-5.4332	8.54e-08	4.24e-07	6.89178	Down-Regulated
WDR38	-1.19031	3.39179	-5.40997	9.66e-08	4.75e-07	6.77278	Down-Regulated
IYD	-1.15773	6.30402	-5.39677	1.04e-07	5.07e-07	6.7054	Down-Regulated
C4orf7	-1.24906	4.24137	-5.37547	1.16e-07	5.63e-07	6.59694	Down-Regulated
FAM92B	-1.01409	3.9787	-5.36881	1.2e-07	5.81e-07	6.56312	Down-Regulated
C1orf194	-1.12518	3.47911	-5.33461	1.44e-07	6.86e-07	6.39002	Down-Regulated
C1orf168	-1.03558	4.03086	-5.33359	1.44e-07	6.89e-07	6.38487	Down-Regulated
MORN5	-1.03699	2.6901	-5.32013	1.55e-07	7.34e-07	6.317	Down-Regulated
ORM2	-1.24913	5.13197	-5.31416	1.6e-07	7.55e-07	6.28696	Down-Regulated
APOH	-1.30788	4.93899	-5.29518	1.76e-07	8.27e-07	6.19165	Down-Regulated
TSPAN8	-1.25095	8.79812	-5.20245	2.84e-07	1.29e-06	5.73035	Down-Regulated
MSLN	-1.59649	10.6518	-5.17236	3.31e-07	1.49e-06	5.58222	Down-Regulated
ZBBX	-1.05224	3.01298	-5.12241	4.27e-07	1.89e-06	5.33806	Down-Regulated
SLC6A20	-1.1394	5.53693	-5.12235	4.27e-07	1.89e-06	5.33778	Down-Regulated
ORM1	-1.14819	6.50393	-5.10613	4.63e-07	2.04e-06	5.25894	Down-Regulated
SCARA5	-1.04012	4.9081	-5.08494	5.15e-07	2.25e-06	5.15634	Down-Regulated
ARSE	-1.08482	7.90018	-4.98454	8.49e-07	3.59e-06	4.67529	Down-Regulated
C14orf105	-1.02692	2.09352	-4.94702	1.02e-06	4.26e-06	4.49772	Down-Regulated
TSPAN19	-1.00301	2.02971	-4.86086	1.55e-06	6.28e-06	4.09467	Down-Regulated
BAAT	-1.01341	4.7971	-4.76802	2.42e-06	9.51e-06	3.66763	Down-Regulated
C8B	-1.03553	3.07166	-4.74172	2.75e-06	1.07e-05	3.54799	Down-Regulated
NELL1	-1.40422	3.1058	-4.71231	3.15e-06	1.21e-05	3.41495	Down-Regulated
HP	-1.30767	8.64563	-4.70084	3.33e-06	1.28e-05	3.36329	Down-Regulated
LOC84740	-1.23802	9.06552	-4.62392	4.77e-06	1.78e-05	3.0197	Down-Regulated
KLK11	-1.27762	6.87679	-4.61026	5.08e-06	1.88e-05	2.95921	Down-Regulated
HSD17B2	-1.06218	4.36068	-4.59249	5.51e-06	2.03e-05	2.88078	Down-Regulated
TM4SF4	-1.39225	4.62944	-4.54025	7e-06	2.53e-05	2.65188	Down-Regulated
PIP	-1.01249	3.12691	-4.47239	9.52e-06	3.35e-05	2.35814	Down-Regulated
SPAG6	-1.10772	4.93527	-4.46371	9.9e-06	3.48e-05	2.32083	Down-Regulated
C10orf81	-1.04333	7.6003	-4.45015	1.05e-05	3.68e-05	2.26273	Down-Regulated
UGT2B15	-1.00842	2.93175	-4.4483	1.06e-05	3.71e-05	2.25485	Down-Regulated
AZGP1	-1.20466	8.40289	-4.43274	1.14e-05	3.96e-05	2.18837	Down-Regulated
GSTA1	-1.18845	6.84405	-4.36691	1.52e-05	5.18e-05	1.90967	Down-Regulated
LTF	-1.01127	9.38903	-4.25687	2.46e-05	8.08e-05	1.45238	Down-Regulated
COL17A1	-1.10201	7.89909	-4.24877	2.55e-05	8.34e-05	1.41918	Down-Regulated
ENPP3	-1.02221	5.68227	-4.23689	2.68e-05	8.75e-05	1.37053	Down-Regulated
SLC5A1	-1.08013	5.30822	-4.18006	3.42e-05	0.000109536	1.13967	Down-Regulated
DBC1	-1.08239	4.32198	-4.1192	4.43e-05	0.000139005	0.895653	Down-Regulated
CHST9	-1.07501	4.07544	-4.10082	4.78e-05	0.000149091	0.822624	Down-Regulated
SPINK1	-1.34447	8.13962	-4.06944	5.45e-05	0.000168307	0.698635	Down-Regulated
AGTR2	-1.02365	4.26856	-4.00691	7.06e-05	0.000213794	0.454251	Down-Regulated
ALDH3A1	-1.11327	7.01154	-3.97257	8.12e-05	0.000242344	0.321539	Down-Regulated
C20orf114	-1.05679	8.79168	-3.31593	0.000977666	0.00239174	-2.00732	Down-Regulated
XIST	-1.50968	7.71179	-3.24302	0.00125921	0.00301618	-2.2412	Down-Regulated
