# Supplementary material for: Prognostic and immune infiltrative biomarkers of CENPO in pan–cancer and its relationship with lung adenocarcinoma cell proliferation and metastasis
Source: BMC Cancer. 2023 Aug 9;23:735. doi: 10.1186/s12885-023-11233-2 (PMC10410993; doi:10.1186/s12885-023-11233-2)
Supplement: Supplementary file 3 — Additional file 3. [file 12885_2023_11233_MOESM3_ESM.zip]

Archive with 5 entries (5 files):
- A549 Cell cycle.tif
- A549.png
- H1299 Cell cycle.tif
- H1299.jpg
- ┴≈╩╜╖╓╬÷.pzfx
