# Supplementary material for: Prognostic and immune infiltrative biomarkers of CENPO in pan–cancer and its relationship with lung adenocarcinoma cell proliferation and metastasis
Source: BMC Cancer. 2023 Aug 9;23:735. doi: 10.1186/s12885-023-11233-2 (PMC10410993; doi:10.1186/s12885-023-11233-2)
Supplement: Supplementary file 5 — Additional file 5. [file 12885_2023_11233_MOESM5_ESM.xlsx]

## Sheet: Sheet1
sample	CENPO		ABSOLUTE_Ploidy	ABSOLUTE_Purity	Pathology	Pathology_Updated	RET_translocation	age_at_initial_pathologic_diagnosis	anatomic_neoplasm_subdivision	anatomic_neoplasm_subdivision_other	bcr_followup_barcode	bcr_patient_barcode	bcr_sample_barcode	days_to_additional_surgery_locoregional_procedure	days_to_additional_surgery_metastatic_procedure	days_to_birth	days_to_collection	days_to_death	days_to_initial_pathologic_diagnosis	days_to_last_followup	days_to_new_tumor_event_after_initial_treatment	disease_code	dlco_predictive_percent	eastern_cancer_oncology_group	egfr_mutation_performed	egfr_mutation_result	eml4_alk_translocation_method	eml4_alk_translocation_performed	followup_case_report_form_submission_reason	followup_treatment_success	form_completion_date	gender	histological_type	history_of_neoadjuvant_treatment	icd_10	icd_o_3_histology	icd_o_3_site	informed_consent_verified	initial_weight	intermediate_dimension	is_ffpe	karnofsky_performance_score	kras_gene_analysis_performed	kras_mutation_found	kras_mutation_result	location_in_lung_parenchyma	longest_dimension	lost_follow_up	new_neoplasm_event_type
TCGA-05-4244-01	7.4234	2						70	R-Lower			TCGA-05-4244	TCGA-05-4244-01A			-25752			0	0											2010-07-22	MALE	Lung Adenocarcinoma- Not Otherwise Specified (NOS)	No	C34.3	8140-03-01	C34.3	YES		0.9	NO					Peripheral Lung	1.1
TCGA-05-4249-01	7.1565	2	3.77	0.46	Papillary predominant Adc	Papillary predominant Adc		67	R-Lower		TCGA-05-4249-F36327	TCGA-05-4249	TCGA-05-4249-01A			-24532			0	1523									Scheduled Follow-up Submission	Complete Remission/Response	2012-10-29	MALE	Lung Adenocarcinoma- Not Otherwise Specified (NOS)	No	C34.3	8140-03-01	C34.3	YES		0.8	NO					Peripheral Lung	1.4	NO
TCGA-05-4250-01	8.1478	2						79	R-Lower			TCGA-05-4250	TCGA-05-4250-01A			-29068		121	0												2010-07-22	FEMALE	Lung Adenocarcinoma- Not Otherwise Specified (NOS)	No	C34.3	8140-03-01	C34.3	YES		0.7	NO						1.2
TCGA-05-4382-01	7.1636	2			Solid predominant Adc	Solid predominant Adc		68	L-Upper		TCGA-05-4382-F36329	TCGA-05-4382				-24868			0	607	334								Scheduled Follow-up Submission	Complete Remission/Response	2012-10-29	MALE	Lung Adenocarcinoma Mixed Subtype	No	C34.1	8255-03-01	C34.1	YES										NO	Distant Metastasis
TCGA-05-4384-01	6.4204	1	2.04	0.48	Papillary predominant Adc	Papillary predominant Adc		66	R-Lower		TCGA-05-4384-F36330	TCGA-05-4384	TCGA-05-4384-01A			-24411			0	426	183								Scheduled Follow-up Submission	Progressive Disease	2012-10-29	MALE	Lung Adenocarcinoma Mixed Subtype	No	C34.3	8255-03-01	C34.3	YES		0.8	NO						0.8	NO	Distant Metastasis
TCGA-05-4389-01	7.4565	2	3.29	0.48	Solid predominant Adc	Solid predominant Adc		70	R-Upper		TCGA-05-4389-F36455	TCGA-05-4389				-25660			0	1369									Scheduled Follow-up Submission	Complete Remission/Response	2012-10-31	MALE	Lung Adenocarcinoma Mixed Subtype	No	C34.1	8255-03-01	C34.1	YES										NO
TCGA-05-4390-01	7.8196	2	3.99	0.57	Acinar predominant Adc	Acinar predominant Adc		58	R-Upper		TCGA-05-4390-F36456	TCGA-05-4390	TCGA-05-4390-01A			-21430			0	1126	395								Scheduled Follow-up Submission	Complete Remission/Response	2012-10-31	FEMALE	Lung Adenocarcinoma Mixed Subtype	No	C34.1	8255-03-01	C34.1	YES		0.9	NO						1.8	NO
TCGA-05-4395-01	7.5146	2	3.24	0.61	Solid predominant Adc	Solid predominant Adc		76	L-Upper			TCGA-05-4395	TCGA-05-4395-01A			-27971		0	0												2010-07-22	MALE	Lung Adenocarcinoma Mixed Subtype	No	C34.1	8255-03-01	C34.1	YES		0.4	NO						1
TCGA-05-4396-01	6.9985	1	1.86	0.74	Papillary predominant Adc	Papillary predominant Adc		76	R-Lower			TCGA-05-4396	TCGA-05-4396-01A			-28094		303	0												2010-07-22	MALE	Lung Adenocarcinoma Mixed Subtype	No	C34.3	8255-03-01	C34.3	YES		0.9	NO						1.6
TCGA-05-4397-01	8.7776	2						65	R-Middle			TCGA-05-4397				-23833		731	0												2010-07-22	MALE	Lung Adenocarcinoma Mixed Subtype	No	C34.2	8255-03-01	C34.2	YES
TCGA-05-4398-01	7.638	2	4.86	0.33	Solid predominant Adc	Solid predominant Adc		47	R-Upper		TCGA-05-4398-F36462	TCGA-05-4398	TCGA-05-4398-01A			-17471			0	1431									Scheduled Follow-up Submission	Complete Remission/Response	2012-10-31	FEMALE	Lung Adenocarcinoma Mixed Subtype	No	C34.1	8255-03-01	C34.1	YES		0.9	NO						1.5	NO
TCGA-05-4402-01	6.9236	1	3.24	0.44	Acinar predominant Adc	Acinar predominant Adc		57	R-Lower		TCGA-05-4402-F36466	TCGA-05-4402	TCGA-05-4402-01A			-20819		244	0										Scheduled Follow-up Submission	Complete Remission/Response	2012-10-31	FEMALE	Lung Adenocarcinoma Mixed Subtype	No	C34.3	8255-03-01	C34.3	YES		0.6	NO						1.6	NO
TCGA-05-4403-01	6.2656	1	2.06	0.46	Invasive mucinous	Invasive mucinous		76	R-Upper			TCGA-05-4403	TCGA-05-4403-01A			-27881			0	578											2010-07-22	MALE	Lung Adenocarcinoma Mixed Subtype	No	C34.1	8255-03-01	C34.1	YES		1	NO						1.5
TCGA-05-4405-01	6.4549	1	3.34	0.38	Acinar predominant Adc	Acinar predominant Adc		74	R-Lower		TCGA-05-4405-F36494	TCGA-05-4405	TCGA-05-4405-01A			-27241			0	610									Scheduled Follow-up Submission	Complete Remission/Response	2012-10-31	FEMALE	Lung Adenocarcinoma Mixed Subtype	No	C34.3	8255-03-01	C34.3	YES		0.7	NO						0.9	NO
TCGA-05-4410-01	6.4736	1			Micropapillary predom Adc	Micropapillary predom Adc		62	L-Upper			TCGA-05-4410	TCGA-05-4410-01A			-22888			0	0											2010-07-22	MALE	Lung Adenocarcinoma Mixed Subtype	No	C34.1	8255-03-01	C34.1	YES		0.8	NO						1
TCGA-05-4415-01	8.5803	2	3.65	0.65	Micropapillary predom Adc	Micropapillary predom Adc		57	L-Lower		TCGA-05-4415-F36499	TCGA-05-4415	TCGA-05-4415-01A			-20880		91	0		60								Scheduled Follow-up Submission	Progressive Disease	2012-10-31	MALE	Lung Adenocarcinoma Mixed Subtype	No	C34.3	8255-03-01	C34.3	YES		1	NO						1.1	NO
TCGA-05-4417-01	7.2563	2	2.96	0.39	Solid predominant Adc	Solid predominant Adc		51	R-Upper		TCGA-05-4417-F36502	TCGA-05-4417	TCGA-05-4417-01A			-18780			0	455									Scheduled Follow-up Submission	Partial Remission/Response	2012-10-31	FEMALE	Lung Adenocarcinoma Mixed Subtype	No	C34.1	8255-03-01	C34.1	YES		0.8	NO						1.4	NO
TCGA-05-4418-01	7.2264	2	2.01	0.53	Solid predominant Adc	Solid predominant Adc		69	L-Lower			TCGA-05-4418	TCGA-05-4418-01A			-25417		274	0												2010-07-22	MALE	Lung Adenocarcinoma Mixed Subtype	No	C34.3	8255-03-01	C34.3	YES		1	NO						1.2
TCGA-05-4420-01	8.0254	2	3.53	0.6	Invasive mucinous	Invasive mucinous		41	R-Lower		TCGA-05-4420-F36531	TCGA-05-4420	TCGA-05-4420-01A			-15159			0	912									Scheduled Follow-up Submission	Complete Remission/Response	2012-11-01	MALE	Lung Adenocarcinoma Mixed Subtype	No	C34.3	8255-03-01	C34.3	YES		0.8	NO						0.8	NO
TCGA-05-4422-01	7.2112	2	2.09	0.63	Acinar predominant Adc	Acinar predominant Adc		68	L-Lower			TCGA-05-4422	TCGA-05-4422-01A			-24837			0	365											2010-07-22	MALE	Lung Adenocarcinoma Mixed Subtype	No	C34.3	8255-03-01	C34.3	YES		0.8	NO						1.5
TCGA-05-4424-01	7.7618	2			Acinar predominant Adc	Acinar predominant Adc		70	R-Upper		TCGA-05-4424-F36536	TCGA-05-4424				-25689			0	913	153								Scheduled Follow-up Submission	Partial Remission/Response	2012-11-01	MALE	Lung Adenocarcinoma Mixed Subtype	No	C34.1	8255-03-01	C34.1	YES										NO	Distant Metastasis
TCGA-05-4425-01	6.8339	1	1.96	0.61	Papillary predominant Adc	Papillary predominant Adc		70	R-Middle			TCGA-05-4425				-25902			0	669											2010-07-22	FEMALE	Lung Adenocarcinoma Mixed Subtype	No	C34.2	8255-03-01	C34.2	YES
TCGA-05-4426-01	6.891	1	1.99	0.71	Solid predominant Adc	Solid predominant Adc		71	L-Lower		TCGA-05-4426-F36562	TCGA-05-4426				-26084			0	791	457								Scheduled Follow-up Submission	Complete Remission/Response	2012-11-02	MALE	Lung Adenocarcinoma Mixed Subtype	No	C34.3	8255-03-01	C34.3	YES										NO
TCGA-05-4427-01	7.7521	2						65	L-Upper		TCGA-05-4427-F36564	TCGA-05-4427	TCGA-05-4427-01A			-23893			0	791									Scheduled Follow-up Submission	Complete Remission/Response	2012-11-02	FEMALE	Lung Adenocarcinoma Mixed Subtype	No	C34.1	8255-03-01	C34.1	YES		0.6	NO						1.7	NO
TCGA-05-4430-01	7.2184	2	3.44	0.2	Solid predominant Adc	Solid predominant Adc		59	L-Lower		TCGA-05-4430-F36427	TCGA-05-4430				-21884			0	761									Scheduled Follow-up Submission	Complete Remission/Response	2012-10-30	FEMALE	Lung Adenocarcinoma Mixed Subtype	No	C34.3	8255-03-01	C34.3	YES										NO
TCGA-05-4432-01	8.1022	2	3.33	0.37	Solid predominant Adc	Solid predominant Adc		66	R-Upper		TCGA-05-4432-F36424	TCGA-05-4432	TCGA-05-4432-01A			-24350			0	761									Scheduled Follow-up Submission	Complete Remission/Response	2012-10-30	MALE	Lung Adenocarcinoma Mixed Subtype	No	C34.1	8255-03-01	C34.1	YES		0.7	NO						1	NO
TCGA-05-4433-01	7.1797	2	1.9	0.61	Invasive mucinous	Invasive mucinous		82	L-Lower		TCGA-05-4433-F36530	TCGA-05-4433	TCGA-05-4433-01A			-30194			0	730									Scheduled Follow-up Submission	Complete Remission/Response	2012-11-01	MALE	Lung Adenocarcinoma Mixed Subtype	No	C34.3	8255-03-01	C34.3	YES		1	NO						1.1	NO
TCGA-05-4434-01	6.9886	1						67	R-Lower			TCGA-05-4434	TCGA-05-4434-01A			-24472		457	0												2010-07-22	FEMALE	Lung Adenocarcinoma Mixed Subtype	No	C34.3	8255-03-01	C34.3	YES		0.8	NO						1.3
TCGA-05-5420-01	7.5365	2	1.83	0.25	Solid predominant Adc	Solid predominant Adc		67	L-Upper		TCGA-05-5420-F36422	TCGA-05-5420	TCGA-05-5420-01A			-24472			0	457	245								Scheduled Follow-up Submission	Progressive Disease	2012-10-30	MALE	Lung Adenocarcinoma- Not Otherwise Specified (NOS)	No	C34.1	8140-03-01	C34.9	YES		0.9	NO						1	NO
TCGA-05-5423-01	6.1905	1	2.36	0.6	Acinar predominant Adc	Acinar predominant Adc		65	L-Upper			TCGA-05-5423	TCGA-05-5423-01A			-23863			0	151											2011-03-22	MALE	Lung Adenocarcinoma Mixed Subtype	No	C34.9	8255-03-01	C34.9	YES		0.8	NO						1.4
TCGA-05-5425-01	7.4558	2						68	R-Upper		TCGA-05-5425-F36403	TCGA-05-5425	TCGA-05-5425-01A			-25020			0	882	486								Scheduled Follow-up Submission	Progressive Disease	2012-10-30	MALE	Lung Adenocarcinoma Mixed Subtype	No	C34.9	8255-03-01	C34.9	YES		0.9	NO						1.2	NO
TCGA-05-5428-01	7.6969	2	3.37	0.63	Solid predominant Adc	Solid predominant Adc		57	R-Upper		TCGA-05-5428-F36401	TCGA-05-5428	TCGA-05-5428-01A			-21061			0	670									Scheduled Follow-up Submission	Complete Remission/Response	2012-10-30	MALE	Lung Adenocarcinoma Mixed Subtype	No	C34.9	8255-03-01	C34.9	YES		0.8	NO						1	NO
TCGA-05-5429-01	6.813	1	2.07	0.47	Acinar predominant Adc	Acinar predominant Adc		60	L-Upper		TCGA-05-5429-F36396	TCGA-05-5429	TCGA-05-5429-01A			-22066		275	0	30									Scheduled Follow-up Submission		2012-10-30	MALE	Lung Adenocarcinoma- Not Otherwise Specified (NOS)	No	C34.1	8140-03-01	C34.9	YES		0.9	NO						1	NO
TCGA-05-5715-01	6.6282	1	1.82	0.74	Micropapillary predom Adc	Micropapillary predom Adc		69	L-Upper			TCGA-05-5715	TCGA-05-5715-01A			-25383			0	62											2011-03-22	FEMALE	Lung Adenocarcinoma Mixed Subtype	No	C34.1	8255-03-01	C34.1	YES		0.6	NO						0.9
TCGA-35-3615-01	6.6435	1	2.07	0.68	Lepidic predominant Adc	Lepidic predominant Adc		57	R-Upper		TCGA-35-3615-F68919	TCGA-35-3615				-21076			0	14					NO			NO	Scheduled Follow-up Submission		2015-08-24	MALE	Lung Adenocarcinoma- Not Otherwise Specified (NOS)	No	C34.1	8140-03-01	C34.1	YES					NO			Peripheral Lung		YES
TCGA-35-4122-01	7.7963	2						69	L-Upper		TCGA-35-4122-F68915	TCGA-35-4122	TCGA-35-4122-01A			-25491			0	225				1	NO			NO	Scheduled Follow-up Submission		2014-12-23	MALE	Lung Adenocarcinoma- Not Otherwise Specified (NOS)	No	C34.1	8140-03-01	C34.1	YES		0.7	NO	80	NO			Peripheral Lung	1	YES
TCGA-35-4123-01	7.6257	2						38	R-Upper		TCGA-35-4123-F68918	TCGA-35-4123	TCGA-35-4123-01A			-14064			0	182				1	NO			NO	Scheduled Follow-up Submission		2014-12-23	MALE	Lung Adenocarcinoma- Not Otherwise Specified (NOS)	No	C34.1	8140-03-01	C34.1	YES		0.4	NO	90	NO			Peripheral Lung	0.9	YES
TCGA-35-5375-01	6.6376	1						61	L-Upper		TCGA-35-5375-F68920	TCGA-35-5375	TCGA-35-5375-01A			-22628			0	264				1					Scheduled Follow-up Submission		2015-08-24	MALE	Lung Adenocarcinoma- Not Otherwise Specified (NOS)	No	C34.1	8140-03-01	C34.1	YES		1	NO	90				Peripheral Lung	1.3	YES
TCGA-38-4625-01	8.0484	2						66	R-Upper		TCGA-38-4625-F33407	TCGA-38-4625				-24241			0	2973			68		NO			NO	Scheduled Follow-up Submission	Complete Remission/Response	2012-07-26	FEMALE	Lung Adenocarcinoma- Not Otherwise Specified (NOS)	No	C34.1	8140-03-01	C34.1	YES					NO			Peripheral Lung		YES
TCGA-38-4626-01	6.7048	1			Solid predominant Adc	Solid predominant Adc		57	L-Upper		TCGA-38-4626-F33409	TCGA-38-4626				-20903			0	3674	2518		57						Scheduled Follow-up Submission	Complete Remission/Response	2012-07-26	FEMALE	Lung Adenocarcinoma- Not Otherwise Specified (NOS)	No	C34.1	8140-03-01	C34.1	YES								Central Lung		NO	New Primary Tumor
TCGA-38-4627-01	6.6451	1			Acinar predominant Adc	Acinar predominant Adc		64	R-Upper		TCGA-38-4627-F4508	TCGA-38-4627				-23510		1147	0												2010-12-08	FEMALE	Lung Adenocarcinoma- Not Otherwise Specified (NOS)	No	C34.1	8140-03-01	C34.1	YES								Central Lung
TCGA-38-4628-01	7.0893	2	5.05	0.5	Acinar predominant Adc	Acinar predominant Adc		65	R-Upper		TCGA-38-4628-F4676	TCGA-38-4628	TCGA-38-4628-01A		1118	-24057		1492	0		1083		72		NO			NO		Stable Disease	2010-12-09	FEMALE	Lung Adenocarcinoma- Not Otherwise Specified (NOS)	No	C34.1	8140-03-01	C34.1	YES		0.5	NO		NO			Central Lung	0.8
TCGA-38-4629-01	7.0946	2						68	R-Upper		TCGA-38-4629-F4887	TCGA-38-4629	TCGA-38-4629-01A			-25104		864	0		379				NO			NO			2010-12-14	MALE	Lung Adenocarcinoma- Not Otherwise Specified (NOS)	No	C34.1	8140-03-01	C34.1	YES		1	NO		NO			Peripheral Lung	1.3
TCGA-38-4630-01	9.024	2						75	R-Upper		TCGA-38-4630-F4972	TCGA-38-4630	TCGA-38-4630-01A			-27667		1073	0		836				NO			NO		Stable Disease	2010-12-16	FEMALE	Lung Papillary Adenocarcinoma	No	C34.1	8260-03-01	C34.1	YES		0.8	NO		NO			Peripheral Lung	1.6
TCGA-38-4631-01	8.3667	2			NSCLC, favor Adeno	NSCLC, favor Adeno		72	L-Upper		TCGA-38-4631-F4892	TCGA-38-4631				-26538		354	0						NO			NO			2010-12-14	FEMALE	Lung Adenocarcinoma- Not Otherwise Specified (NOS)	No	C34.1	8140-03-01	C34.1	YES					NO			Peripheral Lung
TCGA-38-4632-01	7.8801	2			Solid predominant Adc	Solid predominant Adc		42	L-Upper		TCGA-38-4632-F4842	TCGA-38-4632				-15418		1357	0		925				NO			NO		Progressive Disease	2010-12-13	MALE	Lung Adenocarcinoma- Not Otherwise Specified (NOS)	No	C34.1	8140-03-01	C34.1	YES					NO			Peripheral Lung
TCGA-38-6178-01	5.4871	1	3.91	0.33	Acinar predominant Adc	Acinar predominant Adc		70	L-Upper		TCGA-38-6178-F22078	TCGA-38-6178	TCGA-38-6178-01A			-25593			0	448					YES	Exon 19 Deletion		NO	Scheduled Follow-up Submission		2012-02-23	FEMALE	Lung Adenocarcinoma- Not Otherwise Specified (NOS)	No	C34.1	8140-03-01	C34.1	YES		0.6	NO		YES	NO		Central Lung	1.5
TCGA-38-7271-01	5.8738	1						72	R-Upper		TCGA-38-7271-F18312	TCGA-38-7271	TCGA-38-7271-01A			-26440		800	0		633		76		NO			NO	Additional New Tumor Event	Progressive Disease	2011-11-10	FEMALE	Lung Adenocarcinoma- Not Otherwise Specified (NOS)	No	C34.1	8140-03-01	C34.1	YES		0.8	NO		NO				1.1
TCGA-38-A44F-01	5.5026	1						80	R-Upper		TCGA-38-A44F-F47557	TCGA-38-A44F	TCGA-38-A44F-01A			-29534	127		0	133			35		NO		FISH	YES	Scheduled Follow-up Submission		2013-08-26	MALE	Lung Adenocarcinoma Mixed Subtype	No	C34.1	8550-03-01	C34.1	YES	580		NO		NO			Peripheral Lung		YES
TCGA-44-2655-01	6.5916	1	2.05	0.3	Acinar predominant Adc	Acinar predominant Adc		65	R-Upper		TCGA-44-2655-F39289	TCGA-44-2655	TCGA-44-2655-01A			-23854			0	1324	1009		73	0					Scheduled Follow-up Submission	Complete Remission/Response	2013-01-16	FEMALE	Lung Adenocarcinoma- Not Otherwise Specified (NOS)	No	C34.1	8140-03-01	C34.1	YES		0.5	NO		NO				0.5	NO	New Primary Tumor
TCGA-44-2656-01	7.3251	2	3.14	0.31	Solid predominant Adc	Solid predominant Adc		59	R-Upper		TCGA-44-2656-F39934	TCGA-44-2656	TCGA-44-2656-01A			-21766			0	1429	568	FPPP	72	0					Scheduled Follow-up Submission	Complete Remission/Response	2013-02-06	MALE	Lung Adenocarcinoma- Not Otherwise Specified (NOS)	No	C34.1	8140-03-01	C34.1	YES	50	0.8	NO		NO				0.8	NO	New Primary Tumor
TCGA-44-2657-01	6.0026	1	1.74	0.33	Acinar predominant Adc	Acinar predominant Adc		74	L-Upper		TCGA-44-2657-F39296	TCGA-44-2657	TCGA-44-2657-01A			-27298			0	1351			96	0					Scheduled Follow-up Submission	Complete Remission/Response	2013-01-16	FEMALE	Lung Adenocarcinoma- Not Otherwise Specified (NOS)	No	C34.1	8140-03-01	C34.1	YES		0.6	NO		NO				1	NO
TCGA-44-2659-01	6.0849	1	3.6	0.41	Solid predominant Adc	Solid predominant Adc		65	[Discrepancy]		TCGA-44-2659-F40300	TCGA-44-2659	TCGA-44-2659-01A			-23808			0	1367			67	1					Scheduled Follow-up Submission	Complete Remission/Response	2013-02-15	FEMALE	Lung Adenocarcinoma- Not Otherwise Specified (NOS)	No	C34.3	8140-03-01	C34.3	YES		0.8	NO		NO				1.3	NO
TCGA-44-2661-01	6.4997	1	1.86	0.27	Acinar predominant Adc	Acinar predominant Adc		69	L-Upper		TCGA-44-2661-F41293	TCGA-44-2661	TCGA-44-2661-01A			-25313			0	1159				1					Scheduled Follow-up Submission	Complete Remission/Response	2013-03-14	FEMALE	Lung Adenocarcinoma- Not Otherwise Specified (NOS)	No	C34.1	8140-03-01	C34.1	YES		0.7	NO		NO				1.5	NO
TCGA-44-2662-01	7.606	2	3.33	0.25	Solid predominant Adc	Solid predominant Adc		65	R-Upper		TCGA-44-2662-F39415	TCGA-44-2662	TCGA-44-2662-01A			-24014			0	1280		FPPP	78						Scheduled Follow-up Submission	Complete Remission/Response	2013-01-22	MALE	Lung Adenocarcinoma- Not Otherwise Specified (NOS)	No	C34.1	8140-03-01	C34.1	YES		0.9	NO		NO				1	NO
TCGA-44-2665-01	6.078	1	2.12	0.44	Solid predominant Adc	Solid predominant Adc		55	R-Upper		TCGA-44-2665-F40281	TCGA-44-2665	TCGA-44-2665-01A			-20349			0	1301		FPPP	71	0					Scheduled Follow-up Submission	Complete Remission/Response	2013-02-15	FEMALE	Lung Adenocarcinoma- Not Otherwise Specified (NOS)	No	C34.1	8140-03-01	C34.1	YES		0.6	NO		NO				1.1	NO
TCGA-44-2666-01	6.5051	1	1.94	0.58	Papillary predominant Adc	Papillary predominant Adc		43	R-Upper		TCGA-44-2666-F5304	TCGA-44-2666				-15970		97	0	97		FPPP	66								2010-10-12	MALE	Lung Adenocarcinoma- Not Otherwise Specified (NOS)	No	C34.1	8140-03-01	C34.1	YES					NO
TCGA-44-2668-01	7.7685	2						51	R-Upper		TCGA-44-2668-F18688	TCGA-44-2668	TCGA-44-2668-01A	453		-18856		761	0	246	433	FPPP	53	0					Additional New Tumor Event	Progressive Disease	2011-11-22	MALE	Lung Adenocarcinoma- Not Otherwise Specified (NOS)	No	C34.1	8140-03-01	C34.1	YES		1	NO		NO				1.2
TCGA-44-3396-01	7.5617	2			Solid predominant Adc	Solid predominant Adc		74	[Discrepancy]		TCGA-44-3396-F39080	TCGA-44-3396	TCGA-44-3396-01A			-27073			0	1130			48	1					Scheduled Follow-up Submission	Complete Remission/Response	2013-01-11	FEMALE	Lung Adenocarcinoma- Not Otherwise Specified (NOS)	No	C34.1	8140-03-01	C34.1	YES		1	NO	80	NO				1.3	NO
TCGA-44-3398-01	6.2698	1						77	R-Lower		TCGA-44-3398-F38762	TCGA-44-3398	TCGA-44-3398-01A			-28392			0	1163			60						Scheduled Follow-up Submission	Complete Remission/Response	2012-12-21	FEMALE	Lung Adenocarcinoma- Not Otherwise Specified (NOS)	No	C34.3	8140-03-01	C34.3	YES		0.9	NO		NO				1.7	NO
TCGA-44-3918-01	7.1986	2						60	L-Upper		TCGA-44-3918-F38999	TCGA-44-3918	TCGA-44-3918-01A			-22236			0	1036	511	FPPP	76						Scheduled Follow-up Submission	Stable Disease	2013-01-10	FEMALE	Lung Adenocarcinoma- Not Otherwise Specified (NOS)	No	C34.1	8140-03-01	C34.1	YES	280	0.8	NO	90	NO				2	NO	Locoregional Recurrence
TCGA-44-3919-01	7.1949	2	1.94	0.49	Solid predominant Adc	Solid predominant Adc		71	R-Upper		TCGA-44-3919-F38530	TCGA-44-3919				-26081		1026	0	190	984		103	2					Additional New Tumor Event		2012-12-19	FEMALE	Lung Adenocarcinoma- Not Otherwise Specified (NOS)	No	C34.1	8140-03-01	C34.1	YES					NO					NO	Distant Metastasis
TCGA-44-4112-01	6.2097	1	2.13	0.56	Solid predominant Adc	Solid predominant Adc		60	R-Upper		TCGA-44-4112-F32266	TCGA-44-4112	TCGA-44-4112-01A			-22106		808	0	141		FPPP									2012-05-22	FEMALE	Lung Adenocarcinoma- Not Otherwise Specified (NOS)	No	C34.1	8140-03-01	C34.1	YES	220	1	NO		NO				2
TCGA-44-5643-01	7.7939	2						53	R-Lower		TCGA-44-5643-F39742	TCGA-44-5643	TCGA-44-5643-01A			-19426			0	1013			75	1					Scheduled Follow-up Submission	Complete Remission/Response	2013-02-25	MALE	Lung Adenocarcinoma- Not Otherwise Specified (NOS)	No	C34.3	8140-03-01	C34.3	YES		0.8	NO						1.2	NO
TCGA-44-5644-01	6.6722	1						51	R-Lower		TCGA-44-5644-F38817	TCGA-44-5644	TCGA-44-5644-01A			-18644			0	863			61						Scheduled Follow-up Submission	Complete Remission/Response	2012-12-26	FEMALE	Lung Adenocarcinoma- Not Otherwise Specified (NOS)	No	C34.3	8140-03-01	C34.3	YES		1	NO						1	NO
TCGA-44-5645-01	6.3829	1	2.38	0.54	Lepidic predominant Adc	Lepidic predominant Adc		61	L-Upper		TCGA-44-5645-F38800	TCGA-44-5645				-22471			0	852		FPPP	82						Scheduled Follow-up Submission	Complete Remission/Response	2012-12-24	FEMALE	Lung Adenocarcinoma- Not Otherwise Specified (NOS)	No	C34.1	8140-03-01	C34.1	YES										NO
TCGA-44-6145-01	7.1504	2	1.66	0.31	Solid predominant Adc	Solid predominant Adc		62	R-Upper		TCGA-44-6145-F38802	TCGA-44-6145	TCGA-44-6145-01A			-22745			0	595			73	0					Scheduled Follow-up Submission	Complete Remission/Response	2012-12-24	FEMALE	Lung Adenocarcinoma- Not Otherwise Specified (NOS)	No	C34.1	8140-03-01	C34.1	YES		1	NO		NO	NO			1.5	NO
TCGA-44-6146-01	6.3026	1	1.87	0.74	Invasive mucinous	Invasive mucinous		64	L-Lower		TCGA-44-6146-F34551	TCGA-44-6146	TCGA-44-6146-01A			-23378			0	728	631	FPPP	76	0					Additional New Tumor Event		2012-08-22	MALE	Lung Mucinous Adenocarcinoma	No	C34.30	8480-03-01	C34.3	YES	420	0.8	NO						2	NO	Locoregional Recurrence
TCGA-44-6147-01	5.7989	1	2.19	0.36	Acinar predominant Adc	Acinar predominant Adc		67	R-Upper		TCGA-44-6147-F38947	TCGA-44-6147	TCGA-44-6147-01A			-24631			0	845		FPPP	68						Scheduled Follow-up Submission	Complete Remission/Response	2013-01-04	FEMALE	Lung Adenocarcinoma- Not Otherwise Specified (NOS)	No	C34.1	8140-03-01	C34.1	YES	80	0.8	NO	80					1	NO
TCGA-44-6148-01	6.555	1						60	L-Lower		TCGA-44-6148-F38967	TCGA-44-6148	TCGA-44-6148-01A			-22138			0	704				1					Scheduled Follow-up Submission	Complete Remission/Response	2013-01-07	MALE	Lung Mucinous Adenocarcinoma	No	C34.30	8480-03-01	C34.3	YES		0.8	NO		NO	NO			1.5	NO
TCGA-44-6774-01	7.4847	2	2.13	0.36	Acinar predominant Adc	Acinar predominant Adc		56	L-Lower		TCGA-44-6774-F39646	TCGA-44-6774	TCGA-44-6774-01A			-20462			0	658			101	1					Scheduled Follow-up Submission	Complete Remission/Response	2013-01-28	FEMALE	Lung Adenocarcinoma- Not Otherwise Specified (NOS)	No	C34.3	8140-03-01	C34.3	YES		1	NO						1.5	NO
TCGA-44-6775-01	7.2426	2	2.24	0.38	Acinar predominant Adc	Acinar predominant Adc		72	R-Upper		TCGA-44-6775-F40408	TCGA-44-6775	TCGA-44-6775-01A			-26415			0	705	684	FPPP	66						Scheduled Follow-up Submission	Progressive Disease	2013-02-19	FEMALE	Lung Adenocarcinoma- Not Otherwise Specified (NOS)	No	C34.1	8140-03-01	C34.1	YES	70	1.1	NO	100					1.1	NO	Locoregional Recurrence
TCGA-44-6776-01	6.3059	1	1.95	0.64	Papillary predominant Adc	Papillary predominant Adc		60	R-Upper		TCGA-44-6776-F39378	TCGA-44-6776				-22150			0	2616			80						Scheduled Follow-up Submission	Complete Remission/Response	2013-01-21	FEMALE	Lung Adenocarcinoma- Not Otherwise Specified (NOS)	No	C34.1	8140-03-01	C34.1	YES										NO
TCGA-44-6777-01	6.5373	1	1.91	0.34	Solid predominant Adc	Solid predominant Adc		85	L-Upper		TCGA-44-6777-F15694	TCGA-44-6777	TCGA-44-6777-01A			-31234		987	0				178	3					Scheduled Follow-up Submission		2011-08-30	FEMALE	Lung Adenocarcinoma- Not Otherwise Specified (NOS)	No	C34.1	8140-03-01	C34.1	YES		1	NO						1.8
TCGA-44-6778-01	7.2853	2						59	[Discrepancy]		TCGA-44-6778-F39376	TCGA-44-6778	TCGA-44-6778-01A			-21725			0	1864			53						Scheduled Follow-up Submission	Complete Remission/Response	2013-01-21	MALE	Lung Adenocarcinoma- Not Otherwise Specified (NOS)	No	C34.1	8140-03-01	C34.9	YES		0.9	NO						1	NO
TCGA-44-6779-01	7.8235	2	3.12	0.43	Solid predominant Adc	Solid predominant Adc		50	[Discrepancy]		TCGA-44-6779-F15758	TCGA-44-6779	TCGA-44-6779-01A			-18469		500	0		232		44						Scheduled Follow-up Submission		2011-09-12	FEMALE	Lung Adenocarcinoma- Not Otherwise Specified (NOS)	No	C34.1	8140-03-01	C34.9	YES		0.7	NO						1
TCGA-44-7659-01	5.1147	1	2.09	0.59	Acinar predominant Adc	Acinar predominant Adc		70	L-Upper		TCGA-44-7659-F39654	TCGA-44-7659	TCGA-44-7659-01A			-25730			0	691			43						Scheduled Follow-up Submission	Complete Remission/Response	2013-01-29	MALE	Lung Adenocarcinoma- Not Otherwise Specified (NOS)	No	C34.1	8140-03-01	C34.1	YES		0.8	NO		NO				1.2	NO
TCGA-44-7660-01	7.6268	2						72	R-Upper		TCGA-44-7660-F40409	TCGA-44-7660				-26594			0	592			80	1					Scheduled Follow-up Submission	Stable Disease	2013-02-19	MALE	Lung Adenocarcinoma- Not Otherwise Specified (NOS)	No	C34.1	8140-03-01	C34.1	YES				70	NO					NO
TCGA-44-7661-01	7.7483	2						69	R-Lower		TCGA-44-7661-F39321	TCGA-44-7661				-25483		557	0	153	335			0	YES			YES	Scheduled Follow-up Submission	Progressive Disease	2013-01-17	FEMALE	Lung Adenocarcinoma- Not Otherwise Specified (NOS)	No	C34.3	8140-03-01	C34.3	YES								Peripheral Lung		NO	Locoregional Recurrence
TCGA-44-7662-01	7.7653	2	2.9	0.33	Solid predominant Adc	Solid predominant Adc		61	L-Upper		TCGA-44-7662-F34016	TCGA-44-7662	TCGA-44-7662-01A			-22543			0	218			57						Scheduled Follow-up Submission	Complete Remission/Response	2012-07-25	MALE	Lung Adenocarcinoma- Not Otherwise Specified (NOS)	No	C34.1	8140-03-01	C34.1	YES		0.7	NO		NO				1	NO
TCGA-44-7667-01	9.4417	2						49	R-Lower		TCGA-44-7667-F39968	TCGA-44-7667	TCGA-44-7667-01A			-18062			0	1097			50						Scheduled Follow-up Submission	Complete Remission/Response	2013-02-07	FEMALE	Lung Adenocarcinoma- Not Otherwise Specified (NOS)	No	C34.3	8140-03-01	C34.3	YES		0.8	NO		NO				1.7	NO
TCGA-44-7669-01	8.0537	2						59	R-Upper		TCGA-44-7669-F20505	TCGA-44-7669	TCGA-44-7669-01A			-21893		574	0		525		52						Additional New Tumor Event	Progressive Disease	2012-01-16	MALE	Lung Adenocarcinoma- Not Otherwise Specified (NOS)	No	C34.1	8140-03-01	C34.1	YES		0.9	NO		NO				1.8
TCGA-44-7670-01	8.0517	2	2.76	0.68	Lepidic predominant Adc	Lepidic predominant Adc		47	L-Upper		TCGA-44-7670-F39052	TCGA-44-7670	TCGA-44-7670-01A			-17392			0	882			50						Scheduled Follow-up Submission	Complete Remission/Response	2013-01-09	FEMALE	Lung Adenocarcinoma- Not Otherwise Specified (NOS)	No	C34.1	8140-03-01	C34.1	YES		0.8	NO						1.5	NO
TCGA-44-7671-01	6.7708	1	3.03	0.67	Acinar predominant Adc	Acinar predominant Adc		64			TCGA-44-7671-F38982	TCGA-44-7671				-23538			0	889	883		65						Scheduled Follow-up Submission		2013-01-08	MALE	Lung Adenocarcinoma Mixed Subtype	No	C34.2	8255-03-01	C34.2	YES										NO	Locoregional Recurrence
TCGA-44-7672-01	7.2068	2	2.88	0.19	Solid predominant Adc	Solid predominant Adc		52	L-Upper		TCGA-44-7672-F39074	TCGA-44-7672				-19200			0	719			82						Scheduled Follow-up Submission	Complete Remission/Response	2013-01-10	FEMALE	Lung Adenocarcinoma- Not Otherwise Specified (NOS)	No	C34.1	8140-03-01	C34.1	YES										NO
TCGA-44-8117-01	6.9044	1						54	R-Upper		TCGA-44-8117-F36070	TCGA-44-8117	TCGA-44-8117-01A			-19855			0	385			86	1					Scheduled Follow-up Submission	Complete Remission/Response	2012-10-18	FEMALE	Lung Adenocarcinoma- Not Otherwise Specified (NOS)	No	C34.1	8140-03-01	C34.1	YES		0.7	NO						1.1	NO
TCGA-44-8119-01	7.2526	2						73	R-Upper		TCGA-44-8119-F38976	TCGA-44-8119	TCGA-44-8119-01A			-27003			0	285			40	0					Scheduled Follow-up Submission	Complete Remission/Response	2013-01-08	MALE	Lung Adenocarcinoma- Not Otherwise Specified (NOS)	No	C34.1	8140-03-01	C34.1	YES		1	NO						2.6	NO
TCGA-44-8120-01	7.0051	2						58	R-Upper		TCGA-44-8120-F36757	TCGA-44-8120	TCGA-44-8120-01A			-21188			0	260				0					Scheduled Follow-up Submission	Complete Remission/Response	2012-11-13	MALE	Lung Adenocarcinoma- Not Otherwise Specified (NOS)	No	C34.1	8140-03-01	C34.1	YES		0.9	NO						1	NO
TCGA-44-A479-01	7.4492	2						73	R-Upper		TCGA-44-A479-F45874	TCGA-44-A479	TCGA-44-A479-01A	437		-27024	193		0	486	437		60	0	YES			NO	Additional New Tumor Event	Complete Remission/Response	2013-08-12	FEMALE	Lung Adenocarcinoma- Not Otherwise Specified (NOS)	No	C34.1	8140-03-01	C34.1	YES	280		NO		NO					NO	New Primary Tumor
TCGA-44-A47A-01	6.3432	1						78	R-Upper		TCGA-44-A47A-F46609	TCGA-44-A47A	TCGA-44-A47A-01A			-28782	117		0	466	397			1	NO			NO	Additional New Tumor Event		2013-08-12	FEMALE	Lung Adenocarcinoma- Not Otherwise Specified (NOS)	No	C34.1	8140-03-01	C34.1	YES	290		NO		NO					NO	Distant Metastasis
TCGA-44-A47B-01	6.7688	1						79	R-Upper		TCGA-44-A47B-F41746	TCGA-44-A47B				-28869			0	287			73	0	NO			NO	Scheduled Follow-up Submission	Complete Remission/Response	2013-03-27	MALE	Lung Adenocarcinoma- Not Otherwise Specified (NOS)	No	C34.1	8140-03-01	C34.1	YES					NO					NO
TCGA-44-A47G-01	6.8187	1						73	R-Upper		TCGA-44-A47G-F49023	TCGA-44-A47G	TCGA-44-A47G-01A			-26800	71		0	351			85	0	NO			NO	Scheduled Follow-up Submission	Complete Remission/Response	2013-09-25	FEMALE	Lung Adenocarcinoma- Not Otherwise Specified (NOS)	No	C34.1	8140-03-01	C34.1	YES	170		NO		NO					NO
TCGA-44-A4SS-01	7.337	2						73	L-Upper		TCGA-44-A4SS-F49165	TCGA-44-A4SS	TCGA-44-A4SS-01A			-26991	86		0	415			54	0					Scheduled Follow-up Submission	Complete Remission/Response	2013-09-26	MALE	Lung Adenocarcinoma- Not Otherwise Specified (NOS)	No	C34.1	8140-03-01	C34.1	YES	200		NO							NO
TCGA-44-A4SU-01	6.0026	1						67	R-Lower		TCGA-44-A4SU-F49438	TCGA-44-A4SU	TCGA-44-A4SU-01A			-24820	55	409	0	76	260		74	3					Scheduled Follow-up Submission	Progressive Disease	2013-10-03	FEMALE	Lung Adenocarcinoma- Not Otherwise Specified (NOS)	No	C34.3	8140-03-01	C34.3	YES	140		NO							NO	Locoregional Recurrence
TCGA-49-4486-01	6.3306	1	2.1	0.72	Lepidic predominant Adc	Lepidic predominant Adc		72	R-Lower		TCGA-49-4486-F58843	TCGA-49-4486	TCGA-49-4486-01A			-26415		2318	0		2045			2					Scheduled Follow-up Submission	Progressive Disease	2014-04-25	MALE	Lung Adenocarcinoma- Not Otherwise Specified (NOS)	No	C34.3	8140-03-01	C34.3	YES		0.6	NO	60					1.6	NO	Distant Metastasis
TCGA-49-4487-01	7.9894	2			Adenocarcinoma, NOS	Adenocarcinoma, NOS		72	L-Upper		TCGA-49-4487-F14693	TCGA-49-4487	TCGA-49-4487-01A	697	712	-26583		855	0		697								Scheduled Follow-up Submission	Progressive Disease	2011-08-09	FEMALE	Lung Adenocarcinoma- Not Otherwise Specified (NOS)	No	C34.1	8140-03-01	C34.1	YES		0.7	NO						0.9
TCGA-49-4488-01	6.8728	1			Papillary predominant Adc	Papillary predominant Adc		74	L-Lower		TCGA-49-4488-F14699	TCGA-49-4488	TCGA-49-4488-01A		690	-27332		869	0		634								Scheduled Follow-up Submission		2011-08-09	FEMALE	Lung Adenocarcinoma- Not Otherwise Specified (NOS)	No	C34.3	8140-03-01	C34.3	YES		0.8	NO						2
TCGA-49-4490-01	5.9328	1			Micropapillary predom Adc	Micropapillary predom Adc		45	L-Upper		TCGA-49-4490-F14703	TCGA-49-4490	TCGA-49-4490-01A			-16634		385	0										Scheduled Follow-up Submission		2011-08-09	FEMALE	Lung Adenocarcinoma- Not Otherwise Specified (NOS)	No	C34.1	8140-03-01	C34.1	YES		0.5	NO						0.5
TCGA-49-4494-01	7.3641	2	4.06	0.3	Acinar predominant Adc	Acinar predominant Adc		77	L-Upper		TCGA-49-4494-F58840	TCGA-49-4494	TCGA-49-4494-01A			-28387		1081	0					1					Scheduled Follow-up Submission		2014-04-25	MALE	Lung Adenocarcinoma- Not Otherwise Specified (NOS)	No	C34.1	8140-03-01	C34.1	YES		1	NO	90					2.5	NO
TCGA-49-4501-01	6.2664	1	2.85	0.43	Acinar predominant Adc	Acinar predominant Adc		67	R-Upper		TCGA-49-4501-F7014	TCGA-49-4501				-24817		1421	0		545			1						Progressive Disease	2011-02-02	FEMALE	Lung Adenocarcinoma- Not Otherwise Specified (NOS)	No	C34.1	8140-03-01	C34.1	YES
TCGA-49-4505-01	6.6484	1			Micropapillary predom Adc	Micropapillary predom Adc		61	R-Lower		TCGA-49-4505-F58844	TCGA-49-4505	TCGA-49-4505-01A			-22628		428	0		417			1					Scheduled Follow-up Submission		2014-04-25	FEMALE	Lung Adenocarcinoma- Not Otherwise Specified (NOS)	No	C34.3	8140-03-01	C34.3	YES		0.7	NO	80					1.5	NO	Distant Metastasis|New Primary Tumor
TCGA-49-4506-01	7.2798	2	2.69	0.25	Micropapillary predom Adc	Micropapillary predom Adc		68	L-Upper		TCGA-49-4506-F58841	TCGA-49-4506	TCGA-49-4506-01A			-25132		999	0		692			2					Scheduled Follow-up Submission	Progressive Disease	2014-04-25	FEMALE	Lung Adenocarcinoma- Not Otherwise Specified (NOS)	No	C34.1	8140-03-01	C34.1	YES		0.4	NO	70				Peripheral Lung	0.8	NO	Locoregional Recurrence
TCGA-49-4507-01	7.792	2	2.7	0.35	Solid predominant Adc	Solid predominant Adc		73	R-Middle		TCGA-49-4507-F7007	TCGA-49-4507	TCGA-49-4507-01A			-26851		268	0		158			1						Progressive Disease	2011-02-02	FEMALE	Lung Adenocarcinoma- Not Otherwise Specified (NOS)	No	C34.0	8140-03-01	C34.0	YES		0.7	NO						1
TCGA-49-4510-01	5.5908	1	3.39	0.63	Papillary predominant Adc	Papillary predominant Adc		51	L-Upper		TCGA-49-4510-F58842	TCGA-49-4510	TCGA-49-4510-01A			-18762		896	0		502			1					Scheduled Follow-up Submission	Stable Disease	2014-04-25	FEMALE	Lung Adenocarcinoma- Not Otherwise Specified (NOS)	No	C34.1	8140-03-01	C34.1	YES		0.7	NO	80					0.9	NO	Distant Metastasis
TCGA-49-4512-01	6.5546	1	2.43	0.48	Micropapillary predom Adc	Micropapillary predom Adc		69	R-Middle		TCGA-49-4512-F14815	TCGA-49-4512				-25502		905	0	157									Scheduled Follow-up Submission		2011-08-10	FEMALE	Lung Adenocarcinoma- Not Otherwise Specified (NOS)	No	C34.2	8140-03-01	C34.2	YES
TCGA-49-4514-01	6.835	1	1.79	0.34	Papillary predominant Adc	Papillary predominant Adc		79	L-Upper		TCGA-49-4514-F14817	TCGA-49-4514	TCGA-49-4514-01A			-28908			0	1700									Scheduled Follow-up Submission		2011-08-10	FEMALE	Lung Papillary Adenocarcinoma	No	C34.1	8260-03-01	C34.1	YES		0.8	NO						1.4
TCGA-49-6742-01	7.5387	2	3.59	0.49	Acinar predominant Adc	Acinar predominant Adc		70	L-Upper		TCGA-49-6742-F70579	TCGA-49-6742	TCGA-49-6742-01A		214	-25839		488	0	1678	214			3					Scheduled Follow-up Submission	Progressive Disease	2015-02-25	MALE	Mucinous (Colloid) Carcinoma	No	C34.1	8480-03-01	C34.1	YES		0.8	NO	40	YES	NO			2.1	NO	Distant Metastasis
TCGA-49-6743-01	8.5532	2						81	R-Upper		TCGA-49-6743-F71136	TCGA-49-6743	TCGA-49-6743-01A			-29807			0	1621									Scheduled Follow-up Submission	Complete Remission/Response	2015-03-18	FEMALE	Lung Clear Cell Adenocarcinoma	No	C34.1	8310-03-01	C34.1	YES		0.4	NO	100					1.2	NO
TCGA-49-6744-01	5.6912	1			Papillary predominant Adc	Papillary predominant Adc		64	L-Upper		TCGA-49-6744-F70580	TCGA-49-6744	TCGA-49-6744-01A			-23484			0	1683				1					Scheduled Follow-up Submission	Complete Remission/Response	2015-02-25	FEMALE	Lung Adenocarcinoma Mixed Subtype	No	C34.1	8255-03-01	C34.1	YES		0.5	NO	90	YES	YES			2.1	NO
TCGA-49-6745-01	7.5274	2	2.16	0.34	Micropapillary predom Adc	Micropapillary predom Adc		82	L-Upper		TCGA-49-6745-F15015	TCGA-49-6745	TCGA-49-6745-01A			-30133			0	522					YES				Scheduled Follow-up Submission		2011-08-11	MALE	Lung Adenocarcinoma- Not Otherwise Specified (NOS)	No	C34.1	8260-03-01	C34.1	YES		0.7	NO		YES	NO			1.1
TCGA-49-6761-01	7.2682	2	3.13	0.29	Solid predominant Adc	Solid predominant Adc		68	R-Upper		TCGA-49-6761-F22056	TCGA-49-6761	TCGA-49-6761-01A			-24849			0	354			1						Scheduled Follow-up Submission		2012-02-23	FEMALE	Lung Adenocarcinoma- Not Otherwise Specified (NOS)	No	C34.1	8140-03-01	C34.1	YES		0.7	NO						2.3
TCGA-49-6767-01	7.1965	2	3.32	0.43	Adenocarcinoma, NOS	Adenocarcinoma, NOS		46	R-Middle		TCGA-49-6767-F58822	TCGA-49-6767	TCGA-49-6767-01A			-17108			0	677									Scheduled Follow-up Submission		2014-04-24	FEMALE	Lung Adenocarcinoma- Not Otherwise Specified (NOS)	No	C34.2	8140-03-01	C34.2	YES		0.5	NO						1.5	NO
TCGA-49-AAQV-01	7.168	2						63	L-Lower			TCGA-49-AAQV	TCGA-49-AAQV-01A			-23370	717	677	0				95.5	1	YES	Exon 19 Deletion	FISH	YES			2014-06-13	FEMALE	Lung Adenocarcinoma Mixed Subtype	No	C34.3	8255-03-01	C34.3	YES	160		NO	90
TCGA-49-AAR0-01	7.1553	2						57	R-Upper		TCGA-49-AAR0-F71576	TCGA-49-AAR0	TCGA-49-AAR0-01A			-20932	4298		0	4765			107	1					Scheduled Follow-up Submission	Complete Remission/Response	2015-04-10	MALE	Lung Adenocarcinoma- Not Otherwise Specified (NOS)	No	C34.1	8140-03-01	C34.1	YES	200		NO	90						NO
TCGA-49-AAR2-01	7.0241	2						64	R-Lower		TCGA-49-AAR2-F72094	TCGA-49-AAR2	TCGA-49-AAR2-01A			-23479	1778		0	2224			105.8	1					Scheduled Follow-up Submission	Complete Remission/Response	2015-04-10	MALE	Lung Acinar Adenocarcinoma	No	C34.3	8550-03-01	C34.3	YES	130		NO	90						NO
TCGA-49-AAR3-01	6.9664	1						69	R-Upper		TCGA-49-AAR3-F70567	TCGA-49-AAR3	TCGA-49-AAR3-01A			-25469	1927		0	1893				0					Scheduled Follow-up Submission	Complete Remission/Response	2015-02-25	MALE	Lung Adenocarcinoma- Not Otherwise Specified (NOS)	No	C34.1	8140-03-01	C34.1	YES	140		NO	100						NO
TCGA-49-AAR4-01	7.6217	2						51	L-Upper			TCGA-49-AAR4	TCGA-49-AAR4-01A			-18939	2842	879	0				109.4	1							2014-06-18	MALE	Lung Adenocarcinoma- Not Otherwise Specified (NOS)	No	C34.1	8140-03-01	C34.1	YES	200		NO	80
TCGA-49-AAR9-01	8.4297	2						61	Other (please specify)	ALL 3 LOBES OF RT Lung		TCGA-49-AAR9	TCGA-49-AAR9-01A			-22510	5308	260	0					1							2014-06-18	MALE	Lung Adenocarcinoma- Not Otherwise Specified (NOS)	No	C34.1	8140-03-01	C34.9	YES	260		NO	80
TCGA-49-AARE-01	8.3826	2						51	R-Upper			TCGA-49-AARE	TCGA-49-AARE-01A			-18893	5455	1229	0				107.2	1							2014-06-19	FEMALE	Lung Adenocarcinoma- Not Otherwise Specified (NOS)	No	C34.1	8140-03-01	C34.1	YES	180		NO	90
TCGA-49-AARN-01	6.5395	1						56	R-Lower			TCGA-49-AARN	TCGA-49-AARN-01A			-20605	4882	1135	0				110.6	1							2014-06-19	FEMALE	Lung Adenocarcinoma- Not Otherwise Specified (NOS)	No	C34.3	8140-03-01	C34.3	YES	210		NO	90
TCGA-49-AARO-01	7.374	2						39	L-Upper		TCGA-49-AARO-F70571	TCGA-49-AARO	TCGA-49-AARO-01A			-14527	3838		0	3759	3521		103.3	3					Scheduled Follow-up Submission	Stable Disease	2015-02-25	FEMALE	Lung Papillary Adenocarcinoma	No	C34.1	8260-03-01	C34.1	YES	170		NO	40						NO	Locoregional Recurrence
TCGA-49-AARQ-01	7.668	2						41	R-Upper		TCGA-49-AARQ-F72093	TCGA-49-AARQ	TCGA-49-AARQ-01A			-15065	6271		0	6732			99.9	1					Scheduled Follow-up Submission	Complete Remission/Response	2015-04-10	FEMALE	Lung Adenocarcinoma- Not Otherwise Specified (NOS)	No	C34.1	8140-03-01	C34.1	YES	60		NO	90						NO
TCGA-49-AARR-01	6.3573	1						68	L-Upper		TCGA-49-AARR-F70574	TCGA-49-AARR	TCGA-49-AARR-01A			-24942	4634		0	4992	4812		103.5	1					Scheduled Follow-up Submission	Stable Disease	2015-02-25	MALE	Lung Adenocarcinoma- Not Otherwise Specified (NOS)	No	C34.1	8140-03-01	C34.1	YES	170		NO	80						NO	Locoregional Recurrence
TCGA-4B-A93V-01	7.2953	2						52	R-Lower		TCGA-4B-A93V-F67919	TCGA-4B-A93V	TCGA-4B-A93V-01A			-19035	84	300	0	254	251			0					Additional New Tumor Event	Progressive Disease	2014-11-12	FEMALE	Lung Adenocarcinoma Mixed Subtype	No	C34.3	8140-03-01	C34.3	YES	400		NO	0				Peripheral Lung		YES	Distant Metastasis
TCGA-50-5044-01	7.4	2	2.03	0.21	Adenocarcinoma, NOS	Adenocarcinoma, NOS		72	R-Lower		TCGA-50-5044-F31976	TCGA-50-5044				-26567		624	0		483								Scheduled Follow-up Submission	Progressive Disease	2012-05-14	FEMALE	Lung Adenocarcinoma- Not Otherwise Specified (NOS)	No	C34.3	8140-03-01	C34.3	YES										NO	Distant Metastasis
TCGA-50-5045-01	6.6795	1						57	R-Lower		TCGA-50-5045-F32015	TCGA-50-5045	TCGA-50-5045-01A			-20961		2174	0		1433								Scheduled Follow-up Submission	Progressive Disease	2012-05-15	FEMALE	Lung Adenocarcinoma- Not Otherwise Specified (NOS)	No	C34.3	8140-03-01	C34.3	YES		1.5	NO						1.8	NO	Locoregional Recurrence
TCGA-50-5049-01	7.1324	2			Acinar predominant Adc	Acinar predominant Adc		70	R-Upper		TCGA-50-5049-F70448	TCGA-50-5049	TCGA-50-5049-01A			-25577			0	3094	2544				YES				Scheduled Follow-up Submission		2015-02-16	MALE	Lung Adenocarcinoma- Not Otherwise Specified (NOS)	No	C34.1	8140-03-01	C34.1	YES		1.5	NO		YES	NO			2	NO	Locoregional Recurrence
TCGA-50-5051-01	6.7519	1	2.99	0.59	Adenocarcinoma, NOS	Adenocarcinoma, NOS		42	L-Upper		TCGA-50-5051-F32019	TCGA-50-5051	TCGA-50-5051-01A			-15585		478	0	455	184				YES				Scheduled Follow-up Submission	Progressive Disease	2012-05-15	FEMALE	Lung Adenocarcinoma- Not Otherwise Specified (NOS)	No	C34.1	8140-03-01	C34.1	YES		1	NO		YES	YES	Other		1.2	NO	Distant Metastasis
TCGA-50-5055-01	6.1853	1			Acinar predominant Adc	Acinar predominant Adc		79	L-Lower		TCGA-50-5055-F32023	TCGA-50-5055	TCGA-50-5055-01A	792		-28988		1830	0	785	771				YES				Scheduled Follow-up Submission	Progressive Disease	2012-05-15	FEMALE	Lung Adenocarcinoma Mixed Subtype	No	C34.3	8255-03-01	C34.3	YES		1.5	NO		YES	NO			1.9	NO	Locoregional Recurrence|Distant Metastasis
TCGA-50-5066-01	7.5456	2						72	R-Upper		TCGA-50-5066-F70450	TCGA-50-5066	TCGA-50-5066-01A			-26385			0	1442					YES			YES	Scheduled Follow-up Submission	Complete Remission/Response	2015-02-16	MALE	Lung Adenocarcinoma Mixed Subtype	No	C34.1	8255-03-01	C34.1	YES		1	NO		YES	NO			1.5	NO
TCGA-50-5066-02	7.262	2						72	R-Upper		TCGA-50-5066-F70450	TCGA-50-5066				-26385			0	1442					YES			YES	Scheduled Follow-up Submission	Complete Remission/Response	2015-02-16	MALE	Lung Adenocarcinoma Mixed Subtype	No	C34.1	8255-03-01	C34.1	YES					YES	NO				NO
TCGA-50-5068-01	6.2146	1	1.62	0.38	Acinar predominant Adc	Acinar predominant Adc		59	R-Lower		TCGA-50-5068-F32057	TCGA-50-5068	TCGA-50-5068-01A	686		-21728		1499	0	1499	686								Scheduled Follow-up Submission	Progressive Disease	2012-05-16	FEMALE	Lung Adenocarcinoma- Not Otherwise Specified (NOS)	No	C34.3	8140-03-01	C34.3	YES		1.3	NO						1.4	NO	Distant Metastasis
TCGA-50-5072-01	8.6321	2	2.1	0.45	Solid predominant Adc	Solid predominant Adc		74	L-Upper		TCGA-50-5072-F32059	TCGA-50-5072	TCGA-50-5072-01A			-27036		250	0	246	213				YES			YES	Scheduled Follow-up Submission	Progressive Disease	2012-05-16	MALE	Lung Adenocarcinoma- Not Otherwise Specified (NOS)	Yes	C34.1	8140-03-01	C34.1	YES		0.9	NO		YES				1.2	NO	Distant Metastasis
TCGA-50-5930-01	6.2699	1						47	[Discrepancy]		TCGA-50-5930-F32064	TCGA-50-5930				-17238		282	0		177								Scheduled Follow-up Submission	Progressive Disease	2012-05-16	MALE	Lung Adenocarcinoma Mixed Subtype	No	C34.3	8255-03-01	C34.3	YES										NO	Distant Metastasis
TCGA-50-5931-01	7.772	2	3.68	0.76	Solid predominant Adc	Solid predominant Adc		75	L-Upper		TCGA-50-5931-F32067	TCGA-50-5931	TCGA-50-5931-01A			-27733		434	0	267	425								Scheduled Follow-up Submission	Progressive Disease	2012-05-16	FEMALE	Lung Adenocarcinoma- Not Otherwise Specified (NOS)	No	C34.1	8140-03-01	C34.1	YES		1	NO					Central Lung	1.7	NO	Distant Metastasis
TCGA-50-5932-01	7.5117	2	1.8	0.85	Papillary predominant Adc	Papillary predominant Adc		75	R-Upper		TCGA-50-5932-F32080	TCGA-50-5932	TCGA-50-5932-01A			-27454		1235	0	1091	1090								Scheduled Follow-up Submission	Progressive Disease	2012-05-16	MALE	Lung Adenocarcinoma- Not Otherwise Specified (NOS)	No	C34.1	8140-03-01	C34.1	YES		1.3	NO					Central Lung	1.4	NO	Locoregional Recurrence
TCGA-50-5933-01	6.9037	1	2.78	0.3	Solid predominant Adc	Solid predominant Adc		72	L-Lower		TCGA-50-5933-F32104	TCGA-50-5933	TCGA-50-5933-01A			-26377		2393	0	2370									Scheduled Follow-up Submission	Complete Remission/Response	2012-05-17	MALE	Lung Adenocarcinoma- Not Otherwise Specified (NOS)	No	C34.3	8140-03-01	C34.3	YES		1	NO					Central Lung	1.7	NO
TCGA-50-5935-01	5.8781	1	3.08	0.58	Acinar predominant Adc	Acinar predominant Adc		86	L-Upper		TCGA-50-5935-F32108	TCGA-50-5935				-31610		653	0	653					YES	Other			Scheduled Follow-up Submission	Complete Remission/Response	2012-05-17	FEMALE	Lung Adenocarcinoma- Not Otherwise Specified (NOS)	No	C34.1	8140-03-01	C34.1	YES					YES	YES				NO
TCGA-50-5936-01	7.7273	2	3.25	0.43	Acinar predominant Adc	Acinar predominant Adc		58	R-Lower		TCGA-50-5936-F32110	TCGA-50-5936	TCGA-50-5936-01A	177		-21238		257	0		150				YES				Scheduled Follow-up Submission	Progressive Disease	2012-05-17	MALE	Mucinous (Colloid) Carcinoma	No	C34.30	8480-03-01	C34.3	YES		0.8	NO		YES	YES	G12C		0.9	NO
TCGA-50-5939-01	7.1555	2	1.72	0.33	Solid predominant Adc	Solid predominant Adc		85	R-Upper		TCGA-50-5939-F32124	TCGA-50-5939	TCGA-50-5939-01A			-31236		460	0										Scheduled Follow-up Submission	Complete Remission/Response	2012-05-17	MALE	Lung Adenocarcinoma Mixed Subtype	No	C34.1	8255-03-01	C34.1	YES		0.8	NO						1.2
TCGA-50-5941-01	7.3649	2			Adenocarcinoma, NOS	Adenocarcinoma, NOS		55	R-Upper		TCGA-50-5941-F70451	TCGA-50-5941	TCGA-50-5941-01A			-20350			0	1474									Scheduled Follow-up Submission	Complete Remission/Response	2015-02-16	FEMALE	Lung Adenocarcinoma- Not Otherwise Specified (NOS)	No	C34.1	8140-03-01	C34.1	YES		1	NO						1	NO
TCGA-50-5942-01	6.0166	1	1.95	0.7	Lepidic predominant Adc	Lepidic predominant Adc		67	R-Upper		TCGA-50-5942-F70452	TCGA-50-5942	TCGA-50-5942-01A			-24781			0	1847	1378								Scheduled Follow-up Submission		2015-02-16	FEMALE	Lung Adenocarcinoma- Not Otherwise Specified (NOS)	No	C34.1	8140-03-01	C34.1	YES		0.7	NO						1	NO	Locoregional Recurrence
TCGA-50-5944-01	6.8973	1	3.32	0.57	Lepidic predominant Adc	Lepidic predominant Adc		69	R-Upper		TCGA-50-5944-F70454	TCGA-50-5944				-25440			0	1750									Scheduled Follow-up Submission	Complete Remission/Response	2015-02-16	FEMALE	Lung Acinar Adenocarcinoma	No	C34.1	8550-03-01	C34.1	YES										NO
TCGA-50-5946-01	8.4498	2						62	R-Upper		TCGA-50-5946-F70455	TCGA-50-5946	TCGA-50-5946-01A			-22852			0	1617	811									Progressive Disease	2015-02-16	MALE	Lung Adenocarcinoma Mixed Subtype	No	C34.1	8255-03-01	C34.1	YES		1.2	NO						1.5	NO	Distant Metastasis
TCGA-50-5946-02	7.8282	2						62	R-Upper		TCGA-50-5946-F70455	TCGA-50-5946	TCGA-50-5946-02A			-22852			0	1617	811									Progressive Disease	2015-02-16	MALE	Lung Adenocarcinoma Mixed Subtype	No	C34.1	8255-03-01	C34.1	YES		0.4	NO						1.9	NO	Distant Metastasis
TCGA-50-6590-01	8.3603	2						72	R-Upper		TCGA-50-6590-F43827	TCGA-50-6590	TCGA-50-6590-01A			-26444		1288	0						YES				Scheduled Follow-up Submission	Complete Remission/Response	2013-06-04	FEMALE	Lung Adenocarcinoma- Not Otherwise Specified (NOS)	No	C34.1	8140-03-01	C34.1	YES		1	NO						1.6	NO
TCGA-50-6591-01	8.6273	2						63	L-Lower		TCGA-50-6591-F43833	TCGA-50-6591	TCGA-50-6591-01A			-23067		119	0										Scheduled Follow-up Submission	Progressive Disease	2013-06-04	FEMALE	Lung Adenocarcinoma- Not Otherwise Specified (NOS)	No	C34.3	8140-03-01	C34.3	YES		0.8	NO						0.9	NO
TCGA-50-6592-01	7.9702	2						71	L-Lower		TCGA-50-6592-F43835	TCGA-50-6592	TCGA-50-6592-01A			-26191		777	0										Scheduled Follow-up Submission	Progressive Disease	2013-06-04	FEMALE	Lung Adenocarcinoma- Not Otherwise Specified (NOS)	No	C34.3	8140-03-01	C34.3	YES		1	NO						2	NO
TCGA-50-6593-01	6.9635	1	2.9	0.31	Acinar predominant Adc	Acinar predominant Adc		49	R-Upper		TCGA-50-6593-F43840	TCGA-50-6593				-18152		336	0		266				YES			YES	Scheduled Follow-up Submission	Progressive Disease	2013-06-13	FEMALE	Lung Adenocarcinoma Mixed Subtype	No	C34.1	8255-03-01	C34.1	YES					YES	NO				NO	Distant Metastasis
TCGA-50-6594-01	7.954	2						79	L-Upper		TCGA-50-6594-F44032	TCGA-50-6594	TCGA-50-6594-01A			-28924		370	0		285							YES	Scheduled Follow-up Submission	Progressive Disease	2013-06-13	FEMALE	Lung Adenocarcinoma- Not Otherwise Specified (NOS)	No	C34.1	8140-03-01	C34.1	YES		1	NO			NO			1.5	NO	Distant Metastasis
TCGA-50-6595-01	8.1385	2			NSCLC, favor Adeno	NSCLC, favor Adeno		74	R-Upper		TCGA-50-6595-F44127	TCGA-50-6595	TCGA-50-6595-01A		187	-27197		189	0		182				YES			YES	Scheduled Follow-up Submission	Progressive Disease	2013-06-13	FEMALE	Lung Adenocarcinoma- Not Otherwise Specified (NOS)	No	C34.1	8140-03-01	C34.1	YES		0.8	NO		YES				1.7	NO	Distant Metastasis
TCGA-50-6597-01	6.7178	1			Lepidic predominant Adc	Lepidic predominant Adc		79	R-Lower		TCGA-50-6597-F44134	TCGA-50-6597	TCGA-50-6597-01A			-29195		1268	0	1015					YES				Scheduled Follow-up Submission	Complete Remission/Response	2013-06-13	FEMALE	Lung Adenocarcinoma- Not Otherwise Specified (NOS)	No	C34.3	8140-03-01	C34.3	YES		0.9	NO		YES	NO			2	NO
TCGA-50-6673-01	6.5008	1	3.77	0.35	Papillary predominant Adc	Papillary predominant Adc		84	R-Upper		TCGA-50-6673-F44135	TCGA-50-6673	TCGA-50-6673-01A			-30689		22	0										Scheduled Follow-up Submission		2013-06-13	FEMALE	Lung Adenocarcinoma- Not Otherwise Specified (NOS)	No	C34.1	8140-03-01	C34.1	YES		1	NO						1.1	NO
TCGA-50-7109-01	6.5232	1	2.91	0.45	Solid predominant Adc	Solid predominant Adc		60	R-Lower		TCGA-50-7109-F44136	TCGA-50-7109	TCGA-50-7109-01A			-21979		308	0	255	15								Scheduled Follow-up Submission	Progressive Disease	2013-06-13	MALE	Lung Adenocarcinoma- Not Otherwise Specified (NOS)	No	C34.3	8140-03-01	C34.3	YES		0.9	NO						1.3	NO	Distant Metastasis
TCGA-50-8457-01	5.5527	1						63	R-Upper		TCGA-50-8457-F70409	TCGA-50-8457	TCGA-50-8457-01A			-23055			0	1125					YES		FISH	YES	Scheduled Follow-up Submission	Complete Remission/Response	2015-02-11	FEMALE	Lung Adenocarcinoma Mixed Subtype	No	C34.1	8255-03-01	C34.1	YES		0.9	NO		YES	YES	G12A		1.2	NO
TCGA-50-8459-01	6.5345	1						68	R-Lower		TCGA-50-8459-F70410	TCGA-50-8459	TCGA-50-8459-01A			-24859			0	1119			70		YES				Scheduled Follow-up Submission	Progressive Disease	2015-02-11	MALE	Mucinous (Colloid) Carcinoma	No	C34.30	8480-03-01	C34.3	YES		0.7	NO		YES	YES	G12C		1.2	NO
TCGA-50-8460-01	6.1168	1						74	R-Upper		TCGA-50-8460-F69335	TCGA-50-8460	TCGA-50-8460-01A			-27270			0	829					YES				Scheduled Follow-up Submission	Complete Remission/Response	2015-01-05	MALE	Lung Papillary Adenocarcinoma	No	C34.1	8260-03-01	C34.1	YES		0.9	NO		YES	NO			1.3	NO
TCGA-53-7624-01	8.5098	2						40	R-Upper		TCGA-53-7624-F39722	TCGA-53-7624	TCGA-53-7624-01A		593	-14794		1043	0		400			0	NO			NO	Scheduled Follow-up Submission	Progressive Disease	2013-01-31	FEMALE	Lung Adenocarcinoma- Not Otherwise Specified (NOS)	No	C34.1	8140-03-01	C34.1	YES			NO	0	NO			Peripheral Lung		NO	Distant Metastasis
TCGA-53-7626-01	6.7515	1	3.58	0.26	Adenocarcinoma, NOS	Adenocarcinoma, NOS		76	R-Upper		TCGA-53-7626-F38969	TCGA-53-7626	TCGA-53-7626-01A			-28024		929	0		865			0	NO			NO	Scheduled Follow-up Submission	Progressive Disease	2013-01-15	FEMALE	Lung Adenocarcinoma- Not Otherwise Specified (NOS)	No	C34.1	8140-03-01	C34.1	YES			NO		NO			Peripheral Lung		NO	Locoregional Recurrence
TCGA-53-7813-01	5.9469	1						51	R-Upper		TCGA-53-7813-F39281	TCGA-53-7813				-18875			0	424			88	1	NO			NO	Scheduled Follow-up Submission		2013-01-31	FEMALE	Lung Bronchioloalveolar Carcinoma Nonmucinous	No	C34.1	8252-03-01	C34.1	YES					NO					YES
TCGA-53-A4EZ-01	7.3133	2						63	L-Upper		TCGA-53-A4EZ-F61081	TCGA-53-A4EZ	TCGA-53-A4EZ-01A			-23201	163		0	1071			86	1	YES		FISH	YES	Scheduled Follow-up Submission	Complete Remission/Response	2015-03-19	MALE	Lung Acinar Adenocarcinoma	No	C34.1	8550-03-01	C34.1	YES	120		NO	80	YES	NO		Peripheral Lung		NO
TCGA-55-1592-01	7.0542	2	3.24	0.49	Adenocarcinoma, NOS	Adenocarcinoma, NOS		65	L-Upper		TCGA-55-1592-F9167	TCGA-55-1592	TCGA-55-1592-01A					701	0		452									Progressive Disease	2011-03-15	MALE	Lung Adenocarcinoma- Not Otherwise Specified (NOS)	No	C34.1	8140-03-01	C34.1	YES		0.8	NO						1.8
TCGA-55-1594-01	8.4152	2	3.28	0.54	Solid predominant Adc	Solid predominant Adc		68	R-Lower			TCGA-55-1594	TCGA-55-1594-01A			-25008			0	1178											2010-09-14	MALE	Lung Adenocarcinoma- Not Otherwise Specified (NOS)	No	C34.3	8140-03-01	C34.3	YES		0.5	NO						2
TCGA-55-1595-01	7.3785	2						74	L-Lower		TCGA-55-1595-F9159	TCGA-55-1595							0	1479											2011-03-15	FEMALE	Lung Clear Cell Adenocarcinoma	No	C34.3	8310-03-01	C34.3	YES
TCGA-55-1596-01	8.4087	2	3.45	0.62	Solid predominant Adc	Solid predominant Adc		55	R-Upper		TCGA-55-1596-F40544	TCGA-55-1596	TCGA-55-1596-01A			-20381			0	2065									Scheduled Follow-up Submission	Complete Remission/Response	2013-02-22	MALE	Lung Adenocarcinoma- Not Otherwise Specified (NOS)	No	C34.1	8140-03-01	C34.1	YES		0.6	NO						0.9	NO
TCGA-55-5899-01	7.7737	2						58	R-Upper		TCGA-55-5899-F43194	TCGA-55-5899	TCGA-55-5899-01A						0	930				0					Scheduled Follow-up Submission	Complete Remission/Response	2013-05-15	MALE	Lung Adenocarcinoma- Not Otherwise Specified (NOS)	No	C34.1	8140-03-01	C34.1	YES		0.6	NO	100					1	NO
TCGA-55-6543-01	6.2597	1	2.29	0.65	Acinar predominant Adc	Acinar predominant Adc	Y	60	R-Upper		TCGA-55-6543-F46659	TCGA-55-6543	TCGA-55-6543-01A						0	435									Scheduled Follow-up Submission	Complete Remission/Response	2013-08-13	FEMALE	Lung Bronchioloalveolar Carcinoma Mucinous	No	C34.1	8253-03-01	C34.1	YES		0.4	NO					Peripheral Lung	1	NO
TCGA-55-6642-01	7.4404	2	2.66	0.36	Micropapillary predom Adc	Micropapillary predom Adc		63	R-Lower		TCGA-55-6642-F45614	TCGA-55-6642	TCGA-55-6642-01A			-23107			0	2449									Scheduled Follow-up Submission	Complete Remission/Response	2013-07-17	MALE	Lung Adenocarcinoma- Not Otherwise Specified (NOS)	No	C34.3	8140-03-01	C34.3	YES		0.9	NO						1	NO
TCGA-55-6712-01	6.4507	1	3.31	0.29	Adenocarcinoma, NOS	Adenocarcinoma, NOS		71	L-Upper		TCGA-55-6712-F46639	TCGA-55-6712	TCGA-55-6712-01A					171	0	24									Scheduled Follow-up Submission	Progressive Disease	2013-08-13	MALE	Lung Adenocarcinoma- Not Otherwise Specified (NOS)	No	C34.1	8140-03-01	C34.1	YES		0.8	NO						0.9	NO
TCGA-55-6968-01	8.5708	2						61	R-Lower		TCGA-55-6968-F56247	TCGA-55-6968	TCGA-55-6968-01A			-22344		1293	0										Scheduled Follow-up Submission	Stable Disease	2014-01-30	MALE	Lung Adenocarcinoma- Not Otherwise Specified (NOS)	No	C34.3	8140-03-01	C34.3	YES		0.4	NO						0.7	NO
TCGA-55-6969-01	7.6317	2						52	L-Upper			TCGA-55-6969	TCGA-55-6969-01A			-19270			0	1239					NO			NO			2011-07-25	MALE	Lung Adenocarcinoma- Not Otherwise Specified (NOS)	No	C34.1	8140-03-01	C34.1	YES		0.5	NO		NO				0.9
TCGA-55-6970-01	7.4797	2	1.39	0.56	Papillary predominant Adc	Papillary predominant Adc		67	R-Upper		TCGA-55-6970-F57904	TCGA-55-6970	TCGA-55-6970-01A			-24773		464	0		457				NO			NO	Scheduled Follow-up Submission	Progressive Disease	2014-03-28	FEMALE	Lung Papillary Adenocarcinoma	No	C34.1	8260-03-01	C34.1	YES		0.8	NO		NO				1.1	NO	Locoregional Recurrence
TCGA-55-6971-01	6.6121	1	3.34	0.22	Acinar predominant Adc	Acinar predominant Adc		59	L-Lower		TCGA-55-6971-F56190	TCGA-55-6971	TCGA-55-6971-01A			-21734			0	1400					NO			NO	Scheduled Follow-up Submission	Complete Remission/Response	2014-01-29	FEMALE	Lung Adenocarcinoma- Not Otherwise Specified (NOS)	No	C34.3	8140-03-01	C34.3	YES		0.5	NO		NO				1.1	NO
TCGA-55-6972-01	6.3286	1			Acinar predominant Adc	Acinar predominant Adc		72	R-Upper		TCGA-55-6972-F56187	TCGA-55-6972	TCGA-55-6972-01A			-26625		1632	0	1475					NO			NO	Scheduled Follow-up Submission	Complete Remission/Response	2014-01-29	MALE	Lung Papillary Adenocarcinoma	No	C34.1	8260-03-01	C34.1	YES		0.4	NO		NO				0.6	NO
TCGA-55-6975-01	7.7024	2						61	L-Lower		TCGA-55-6975-F45635	TCGA-55-6975	TCGA-55-6975-01A					118	0						NO			NO	Scheduled Follow-up Submission	Progressive Disease	2013-07-17	MALE	Lung Adenocarcinoma Mixed Subtype	No	C34.3	8255-03-01	C34.3	YES		0.2	NO		NO				0.2	NO
TCGA-55-6978-01	7.7567	2			NSCLC, favor Adeno	NSCLC, favor Adeno		81	R-Middle		TCGA-55-6978-F45607	TCGA-55-6978	TCGA-55-6978-01A					176	0		42				NO			NO	Scheduled Follow-up Submission	Progressive Disease	2013-07-17	MALE	Lung Adenocarcinoma- Not Otherwise Specified (NOS)	No	C34.2	8140-03-01	C34.2	YES		0.6	NO		NO				0.7	NO
TCGA-55-6979-01	7.3565	2	3.35	0.18	Solid predominant Adc	Solid predominant Adc		59	L-Upper		TCGA-55-6979-F37057	TCGA-55-6979	TCGA-55-6979-01A			-21780		237	0		195				NO			NO	Scheduled Follow-up Submission	Progressive Disease	2013-02-22	FEMALE	Lung Adenocarcinoma- Not Otherwise Specified (NOS)	No	C34.1	8140-03-01	C34.1	YES		0.7	NO		NO				1	NO	Distant Metastasis
TCGA-55-6980-01	5.6472	1	2.15	0.3	Other see comment	Acinar predominant Adc		56	R-Lower		TCGA-55-6980-F46642	TCGA-55-6980	TCGA-55-6980-01A						0	2109					NO			NO	Scheduled Follow-up Submission	Complete Remission/Response	2013-08-13	MALE	Lung Bronchioloalveolar Carcinoma Nonmucinous	No	C34.3	8252-03-01	C34.3	YES		0.3	NO		NO				0.7	NO
TCGA-55-6981-01	7.4009	2	3.42	0.27	Solid predominant Adc	Solid predominant Adc		53	L-Upper		TCGA-55-6981-F56243	TCGA-55-6981	TCGA-55-6981-01A			-19497		1379	0						NO			NO	Scheduled Follow-up Submission	Complete Remission/Response	2014-01-30	FEMALE	Lung Adenocarcinoma- Not Otherwise Specified (NOS)	No	C34.1	8140-03-01	C34.1	YES		0.6	NO		NO				0.8	NO
TCGA-55-6982-01	7.3274	2	2.7	0.25	Solid predominant Adc	Solid predominant Adc		79	R-Lower		TCGA-55-6982-F46626	TCGA-55-6982	TCGA-55-6982-01A		183			995	0		183				NO			NO	Scheduled Follow-up Submission	Progressive Disease	2013-08-13	FEMALE	Lung Adenocarcinoma- Not Otherwise Specified (NOS)	No	C34.3	8140-03-01	C34.3	YES		0.3	NO		NO				0.5	NO	Distant Metastasis
TCGA-55-6983-01	6.4943	1			Colloid adenoca	Colloid adenoca		81	L-Lower		TCGA-55-6983-F47805	TCGA-55-6983	TCGA-55-6983-01A						0	2823					NO			NO	Scheduled Follow-up Submission	Complete Remission/Response	2013-08-28	MALE	Mucinous (Colloid) Carcinoma	No	C34.30	8480-03-01	C34.3	YES		0.3	NO		NO				0.5	NO
TCGA-55-6984-01	6.1719	1						71	L-Lower		TCGA-55-6984-F45632	TCGA-55-6984						760	0		724				NO			NO	Scheduled Follow-up Submission	Progressive Disease	2013-07-17	FEMALE	Lung Adenocarcinoma- Not Otherwise Specified (NOS)	No	C34.3	8140-03-01	C34.3	YES					NO					NO
TCGA-55-6985-01	7.0032	2			Acinar predominant Adc	Acinar predominant Adc		58	L-Upper		TCGA-55-6985-F37056	TCGA-55-6985				-21381			0	1233					NO			NO	Scheduled Follow-up Submission		2013-02-22	FEMALE	Lung Adenocarcinoma- Not Otherwise Specified (NOS)	No	C34.1	8140-03-01	C34.1	YES					NO					YES
TCGA-55-6986-01	6.4675	1	1.96	0.39	Micropapillary predom Adc	Micropapillary predom Adc		74	R-Lower		TCGA-55-6986-F45606	TCGA-55-6986							0	3261					NO			NO	Scheduled Follow-up Submission	Complete Remission/Response	2013-07-17	FEMALE	Lung Bronchioloalveolar Carcinoma Nonmucinous	No	C34.3	8252-03-01	C34.3	YES					NO					NO
TCGA-55-6987-01	6.6364	1						77	L-Lower		TCGA-55-6987-F47803	TCGA-55-6987	TCGA-55-6987-01A			-28382			0	2137					NO			NO	Scheduled Follow-up Submission	Complete Remission/Response	2013-08-28	MALE	Lung Adenocarcinoma- Not Otherwise Specified (NOS)	No	C34.3	8140-03-01	C34.3	YES		0.1	NO		NO				0.2	NO
TCGA-55-7227-01	6.3308	1						77	R-Lower		TCGA-55-7227-F65704	TCGA-55-7227	TCGA-55-7227-01A			-28458		952	0	53	255								Scheduled Follow-up Submission	Progressive Disease	2014-09-26	MALE	Lung Adenocarcinoma- Not Otherwise Specified (NOS)	No	C34.3	8140-03-01	C34.3	YES		0.3	NO						0.5	NO	Locoregional Recurrence
TCGA-55-7281-01	6.1606	1	1.85	0.59	Acinar predominant Adc	Acinar predominant Adc		70	R-Middle		TCGA-55-7281-F47807	TCGA-55-7281				-25870			0	872	339								Scheduled Follow-up Submission	Partial Remission/Response	2013-08-28	FEMALE	Lung Adenocarcinoma- Not Otherwise Specified (NOS)	No	C34.2	8140-03-01	C34.2	YES					NO					NO	Distant Metastasis
TCGA-55-7283-01	7.3124	2			Adenocarcinoma, NOS	Adenocarcinoma, NOS		76	R-Upper		TCGA-55-7283-F46988	TCGA-55-7283	TCGA-55-7283-01A			-27946			0	609			64	0	NO			NO	Scheduled Follow-up Submission	Partial Remission/Response	2013-08-21	FEMALE	Lung Bronchioloalveolar Carcinoma Nonmucinous	No	C34.1	8252-03-01	C34.1	YES		0.1	NO	100	NO			Central Lung	0.1	NO
TCGA-55-7284-01	6.84	1						74	R-Lower		TCGA-55-7284-F61486	TCGA-55-7284	TCGA-55-7284-01B			-27087		243	0	121	231		89						Scheduled Follow-up Submission	Progressive Disease	2014-06-30	MALE	Lung Bronchioloalveolar Carcinoma Nonmucinous	No	C34.8	8252-03-01	C34.8	YES		0.5	NO						0.9	NO	Distant Metastasis
TCGA-55-7570-01	8.5755	2						60	R-Upper		TCGA-55-7570-F56185	TCGA-55-7570	TCGA-55-7570-01A			-22218			0	824									Scheduled Follow-up Submission	Complete Remission/Response	2014-01-29	MALE	Lung Adenocarcinoma- Not Otherwise Specified (NOS)	No	C34.1	8140-03-01	C34.1	YES		0.2	NO						0.3	NO
TCGA-55-7573-01	6.0748	1	3.2	0.33	Acinar predominant Adc	Acinar predominant Adc		72	R-Upper		TCGA-55-7573-F46657	TCGA-55-7573	TCGA-55-7573-01A			-26302			0	487			51	1	NO			NO	Scheduled Follow-up Submission	Complete Remission/Response	2013-08-13	FEMALE	Lung Adenocarcinoma- Not Otherwise Specified (NOS)	No	C34.1	8140-03-01	C34.1	YES		0.7	NO	90	NO			Central Lung	0.9	NO
TCGA-55-7574-01	6.4353	1	2.12	0.16	Solid predominant Adc	Solid predominant Adc		64	R-Upper		TCGA-55-7574-F64279	TCGA-55-7574	TCGA-55-7574-01A			-23703		995	0	95	478			3					Scheduled Follow-up Submission	Progressive Disease	2014-08-28	FEMALE	Lung Adenocarcinoma- Not Otherwise Specified (NOS)	No	C34.1	8140-03-01	C34.1	YES		0.7	NO	50	NO				0.9	NO	Distant Metastasis
TCGA-55-7576-01	7.633	2	2.86	0.47	Acinar predominant Adc	Acinar predominant Adc		54	R-Upper		TCGA-55-7576-F45603	TCGA-55-7576	TCGA-55-7576-01A			-19917			0	670									Scheduled Follow-up Submission	Complete Remission/Response	2013-07-17	MALE	Lung Adenocarcinoma- Not Otherwise Specified (NOS)	No	C34.1	8140-03-01	C34.1	YES		0.5	NO						0.5	NO
TCGA-55-7724-01	7.0902	2			Solid predominant Adc	Solid predominant Adc		76	L-Upper		TCGA-55-7724-F56186	TCGA-55-7724	TCGA-55-7724-01A			-27891			0	705			49						Scheduled Follow-up Submission	Complete Remission/Response	2014-01-29	FEMALE	Lung Adenocarcinoma- Not Otherwise Specified (NOS)	No	C34.1	8140-03-01	C34.1	YES		0.4	NO						0.7	NO
TCGA-55-7725-01	5.6775	1			Acinar predominant Adc	Acinar predominant Adc		68	R-Lower		TCGA-55-7725-F46647	TCGA-55-7725	TCGA-55-7725-01A			-24848			0	442				0	NO			NO	Scheduled Follow-up Submission	Complete Remission/Response	2013-08-13	FEMALE	Lung Adenocarcinoma- Not Otherwise Specified (NOS)	No	C34.3	8140-03-01	C34.3	YES		0.4	NO	100	NO			Central Lung	0.5	NO
TCGA-55-7726-01	7.0436	2						72	L-Lower		TCGA-55-7726-F47844	TCGA-55-7726				-26451			0	652			72						Scheduled Follow-up Submission	Complete Remission/Response	2013-08-29	FEMALE	Lung Adenocarcinoma- Not Otherwise Specified (NOS)	No	C34.3	8140-03-01	C34.3	YES										NO
TCGA-55-7727-01	7.3445	2			Micropapillary predom Adc	Micropapillary predom Adc		70	L-Upper		TCGA-55-7727-F66030	TCGA-55-7727				-25929			0	119			86						Scheduled Follow-up Submission	Complete Remission/Response	2014-10-01	MALE	Lung Adenocarcinoma- Not Otherwise Specified (NOS)	No	C34.1	8140-03-01	C34.1	YES										YES
TCGA-55-7728-01	6.1565	1			Invasive mucinous	Invasive mucinous		64	L-Upper		TCGA-55-7728-F47841	TCGA-55-7728	TCGA-55-7728-01A			-23505			0	704			64		NO			NO	Scheduled Follow-up Submission	Complete Remission/Response	2013-08-29	FEMALE	Mucinous (Colloid) Carcinoma	No	C34.1	8480-03-01	C34.1	YES		0.8	NO		NO				1	NO
TCGA-55-7815-01	6.3307	1						76	R-Lower		TCGA-55-7815-F61497	TCGA-55-7815				-28119			0	773	592		59						Additional New Tumor Event	Progressive Disease	2014-06-30	MALE	Lung Adenocarcinoma- Not Otherwise Specified (NOS)	No	C34.3	8140-03-01	C34.3	YES										NO	Distant Metastasis
TCGA-55-7816-01	6.7224	1						49	R-Upper		TCGA-55-7816-F60131	TCGA-55-7816	TCGA-55-7816-01A			-18170		468	0	44									Scheduled Follow-up Submission	Progressive Disease	2014-05-29	FEMALE	Lung Adenocarcinoma- Not Otherwise Specified (NOS)	No	C34.1	8140-03-01	C34.1	YES		0.3	NO						0.3	NO
TCGA-55-7903-01	7.1479	2			Solid predominant Adc	Solid predominant Adc		64	R-Lower		TCGA-55-7903-F47840	TCGA-55-7903	TCGA-55-7903-01A			-23509			0	567			83		NO			NO	Scheduled Follow-up Submission	Complete Remission/Response	2013-08-29	MALE	Lung Adenocarcinoma- Not Otherwise Specified (NOS)	No	C34.3	8140-03-01	C34.3	YES		0.2	NO		NO				0.5	NO
TCGA-55-7907-01	7.129	2			Micropapillary predom Adc	Micropapillary predom Adc		77	L-Upper		TCGA-55-7907-F60132	TCGA-55-7907	TCGA-55-7907-01A			-28201		343	0	16	294		75						Scheduled Follow-up Submission	Progressive Disease	2014-05-29	MALE	Lung Adenocarcinoma- Not Otherwise Specified (NOS)	No	C34.1	8140-03-01	C34.1	YES		0.3	NO						0.3	NO	Distant Metastasis
TCGA-55-7910-01	7.7665	2						50	L-Lower		TCGA-55-7910-F66140	TCGA-55-7910	TCGA-55-7910-01A			-18289			0	1040	1018		44	1					Scheduled Follow-up Submission		2014-10-03	FEMALE	Lung Adenocarcinoma- Not Otherwise Specified (NOS)	No	C34.3	8140-03-01	C34.3	YES		0.6	NO	80				Peripheral Lung	0.9	NO
TCGA-55-7911-01	7.5598	2			Solid predominant Adc	Solid predominant Adc		70	R-Middle		TCGA-55-7911-F48785	TCGA-55-7911	TCGA-55-7911-01A			-25746			0	537	515				NO			NO	Scheduled Follow-up Submission	Complete Remission/Response	2013-09-20	FEMALE	Lung Adenocarcinoma- Not Otherwise Specified (NOS)	No	C34.2	8140-03-01	C34.2	YES		0.5	NO		NO				0.8	NO	New Primary Tumor
TCGA-55-7913-01	7.8933	2						61	L-Lower		TCGA-55-7913-F57911	TCGA-55-7913	TCGA-55-7913-01B			-22326		561	0	62	480			1	YES		FISH	YES	Scheduled Follow-up Submission	Progressive Disease	2014-03-28	FEMALE	Lung Adenocarcinoma- Not Otherwise Specified (NOS)	No	C34.3	8140-03-01	C34.3	YES		0.4	NO	90	YES	NO		Central Lung	0.7	NO	Distant Metastasis
TCGA-55-7914-01	6.7717	1			Acinar predominant Adc	Acinar predominant Adc		71	R-Upper		TCGA-55-7914-F59091	TCGA-55-7914	TCGA-55-7914-01A			-26105		187	0	3			56	1	YES		FISH	YES	Scheduled Follow-up Submission	Progressive Disease	2014-04-30	FEMALE	Lung Adenocarcinoma- Not Otherwise Specified (NOS)	No	C34.1	8140-03-01	C34.1	YES		0.2	NO	80	YES	YES	G12C	Central Lung	0.4	NO
TCGA-55-7994-01	7.5962	2						81	R-Upper		TCGA-55-7994-F47823	TCGA-55-7994				-29858			0	603					NO			NO	Scheduled Follow-up Submission	Complete Remission/Response	2013-08-28	MALE	Lung Adenocarcinoma- Not Otherwise Specified (NOS)	No	C34.1	8140-03-01	C34.1	YES					NO					NO
TCGA-55-7995-01	7.7367	2						73	L-Upper		TCGA-55-7995-F65700	TCGA-55-7995	TCGA-55-7995-01A			-26837			0	889	468		51	1	NO			NO	Scheduled Follow-up Submission	Complete Remission/Response	2014-09-26	FEMALE	Lung Adenocarcinoma- Not Otherwise Specified (NOS)	No	C34.1	8140-03-01	C34.1	YES		0.7	NO	80				Peripheral Lung	0.8	NO	Locoregional Recurrence
TCGA-55-8085-01	6.9077	1						64	L-Lower		TCGA-55-8085-F65697	TCGA-55-8085	TCGA-55-8085-01A			-23596			0	904			51	1					Scheduled Follow-up Submission	Complete Remission/Response	2014-09-26	MALE	Lung Papillary Adenocarcinoma	No	C34.3	8260-03-01	C34.3	YES		0.5	NO						0.7	NO
TCGA-55-8087-01	6.4408	1						59	R-Upper		TCGA-55-8087-F47822	TCGA-55-8087				-21655			0	462			142		NO			NO	Scheduled Follow-up Submission	Complete Remission/Response	2013-08-28	FEMALE	Lung Adenocarcinoma- Not Otherwise Specified (NOS)	No	C34.1	8140-03-01	C34.1	YES					NO					NO
TCGA-55-8089-01	7.9271	2						56	R-Upper		TCGA-55-8089-F59075	TCGA-55-8089	TCGA-55-8089-01A			-20576		702	0	100			90	0	YES			YES	Scheduled Follow-up Submission	Complete Remission/Response	2014-04-30	MALE	Lung Adenocarcinoma- Not Otherwise Specified (NOS)	No	C34.1	8140-03-01	C34.1	YES		0.2	NO	100	YES	NO		Peripheral Lung	0.2	NO
TCGA-55-8090-01	6.7892	1						80	R-Lower		TCGA-55-8090-F56189	TCGA-55-8090	TCGA-55-8090-01A			-29235		598	0	6	548		58						Scheduled Follow-up Submission	Progressive Disease	2014-01-29	MALE	Lung Adenocarcinoma- Not Otherwise Specified (NOS)	No	C34.3	8140-03-01	C34.3	YES		0.4	NO						1	NO	Distant Metastasis
TCGA-55-8091-01	6.2832	1						74	R-Lower		TCGA-55-8091-F47820	TCGA-55-8091	TCGA-55-8091-01A			-27385			0	600			65		NO			NO	Scheduled Follow-up Submission	Complete Remission/Response	2013-08-28	MALE	Lung Adenocarcinoma- Not Otherwise Specified (NOS)	No	C34.3	8140-03-01	C34.3	YES		0.8	NO		NO				1.1	NO
TCGA-55-8092-01	7.2056	2						75	R-Upper		TCGA-55-8092-F46643	TCGA-55-8092				-27597		154	0	26	127		19						Scheduled Follow-up Submission	Progressive Disease	2013-08-13	MALE	Lung Adenocarcinoma- Not Otherwise Specified (NOS)	No	C34.1	8140-03-01	C34.1	YES										NO	Locoregional Recurrence
TCGA-55-8094-01	7.3238	2						51	L-Upper		TCGA-55-8094-F66029	TCGA-55-8094				-18903			0	541					YES		FISH	YES	Scheduled Follow-up Submission	Partial Remission/Response	2014-10-01	MALE	Lung Adenocarcinoma- Not Otherwise Specified (NOS)	No	C34.1	8140-03-01	C34.1	YES					NO			Peripheral Lung		NO
TCGA-55-8096-01	6.4798	1						67	L-Upper		TCGA-55-8096-F59097	TCGA-55-8096	TCGA-55-8096-01A			-24684		719	0	47	566			2	NO			NO	Scheduled Follow-up Submission	Progressive Disease	2014-04-30	FEMALE	Lung Adenocarcinoma- Not Otherwise Specified (NOS)	No	C34.1	8140-03-01	C34.1	YES		0.9	NO	70	NO			Central Lung	0.9	NO	Distant Metastasis
TCGA-55-8097-01	6.2445	1						60	R-Upper		TCGA-55-8097-F47821	TCGA-55-8097	TCGA-55-8097-01A			-22260			0	476			74		NO			NO	Scheduled Follow-up Submission	Complete Remission/Response	2013-08-28	FEMALE	Lung Adenocarcinoma- Not Otherwise Specified (NOS)	No	C34.1	8140-03-01	C34.1	YES		0.4	NO		NO				0.5	NO
TCGA-55-8203-01	6.9998	1						69	R-Lower		TCGA-55-8203-F47819	TCGA-55-8203	TCGA-55-8203-01A			-25477			0	547			39		NO			NO	Scheduled Follow-up Submission	Complete Remission/Response	2013-08-28	FEMALE	Lung Adenocarcinoma- Not Otherwise Specified (NOS)	No	C34.3	8140-03-01	C34.3	YES		0.3	NO		NO				0.4	NO
TCGA-55-8204-01	7.2567	2						87	L-Upper		TCGA-55-8204-F47802	TCGA-55-8204				-31818			0	515			101						Scheduled Follow-up Submission	Complete Remission/Response	2013-08-28	FEMALE	Lung Adenocarcinoma- Not Otherwise Specified (NOS)	No	C34.1	8140-03-01	C34.1	YES										NO
TCGA-55-8205-01	8.4057	2						76	R-Lower		TCGA-55-8205-F59040	TCGA-55-8205	TCGA-55-8205-01A			-28063			0	599	495			0	YES			NO	Scheduled Follow-up Submission	Progressive Disease	2014-04-30	FEMALE	Lung Adenocarcinoma- Not Otherwise Specified (NOS)	No	C34.3	8140-03-01	C34.3	YES		1	NO	100	YES	NO		Central Lung	1.1	NO	Distant Metastasis
TCGA-55-8206-01	6.6811	1						56	R-Upper		TCGA-55-8206-F65698	TCGA-55-8206				-20690			0	888			98						Scheduled Follow-up Submission	Complete Remission/Response	2014-09-26	MALE	Lung Adenocarcinoma- Not Otherwise Specified (NOS)	No	C34.1	8140-03-01	C34.1	YES										NO
TCGA-55-8207-01	5.7227	1						73	L-Lower		TCGA-55-8207-F65849	TCGA-55-8207	TCGA-55-8207-01A			-26897			0	977			48						Scheduled Follow-up Submission	Complete Remission/Response	2014-09-30	MALE	Lung Acinar Adenocarcinoma	No	C34.3	8550-03-01	C34.3	YES		0.5	NO						0.9	NO
TCGA-55-8208-01	7.2568	2						73	R-Upper		TCGA-55-8208-F59045	TCGA-55-8208			536	-26716			0	674	511		50	0					Scheduled Follow-up Submission	Stable Disease	2014-04-30	FEMALE	Lung Adenocarcinoma- Not Otherwise Specified (NOS)	No	C34.1	8140-03-01	C34.1	YES				100				Peripheral Lung		YES	Distant Metastasis
TCGA-55-8299-01	7.5373	2						61	R-Upper		TCGA-55-8299-F57915	TCGA-55-8299				-22626		469	0	216	274								Scheduled Follow-up Submission	Progressive Disease	2014-03-28	FEMALE	Lung Adenocarcinoma- Not Otherwise Specified (NOS)	No	C34.1	8140-03-01	C34.1	YES										NO	Distant Metastasis
TCGA-55-8301-01	6.8958	1						58	R-Lower		TCGA-55-8301-F56261	TCGA-55-8301				-21535			0	534	238								Scheduled Follow-up Submission	Partial Remission/Response	2014-01-30	MALE	Lung Adenocarcinoma- Not Otherwise Specified (NOS)	No	C34.3	8140-03-01	C34.3	YES										NO	Locoregional Recurrence
TCGA-55-8302-01	7.5174	2						54	R-Lower		TCGA-55-8302-F56188	TCGA-55-8302				-20011			0	478									Scheduled Follow-up Submission	Complete Remission/Response	2014-01-29	MALE	Lung Adenocarcinoma- Not Otherwise Specified (NOS)	No	C34.3	8140-03-01	C34.3	YES										NO
TCGA-55-8505-01	7.7899	2						62	R-Lower		TCGA-55-8505-F47798	TCGA-55-8505	TCGA-55-8505-01A			-22676			0	440									Scheduled Follow-up Submission	Complete Remission/Response	2013-08-28	MALE	Lung Adenocarcinoma- Not Otherwise Specified (NOS)	No	C34.3	8140-03-01	C34.3	YES		0.7	NO						1.2	NO
TCGA-55-8506-01	6.6228	1						62	R-Upper			TCGA-55-8506	TCGA-55-8506-01A			-22850			0	11											2012-12-28	FEMALE	Lung Adenocarcinoma- Not Otherwise Specified (NOS)	No	C34.1	8140-03-01	C34.1	YES		0.7	NO					Peripheral Lung	1.1
TCGA-55-8507-01	7.6391	2						53	R-Upper		TCGA-55-8507-F48792	TCGA-55-8507	TCGA-55-8507-01A			-19390			0	418				3					Scheduled Follow-up Submission	Complete Remission/Response	2013-09-20	MALE	Lung Adenocarcinoma- Not Otherwise Specified (NOS)	No	C34.1	8140-03-01	C34.1	YES		0.7	NO	40				Peripheral Lung	1	NO
TCGA-55-8508-01	6.8558	1						60	R-Upper		TCGA-55-8508-F66137	TCGA-55-8508	TCGA-55-8508-01A			-22159			0	617				2					Scheduled Follow-up Submission	Complete Remission/Response	2014-10-03	FEMALE	Mucinous (Colloid) Carcinoma	No	C34.1	8480-03-01	C34.1	YES		0.7	NO	60				Central Lung	1	NO
TCGA-55-8510-01	6.7858	1						55	R-Lower		TCGA-55-8510-F57923	TCGA-55-8510	TCGA-55-8510-01A			-20410			0	539			54						Scheduled Follow-up Submission	Complete Remission/Response	2014-03-28	FEMALE	Lung Adenocarcinoma- Not Otherwise Specified (NOS)	No	C34.3	8140-03-01	C34.3	YES		1	NO						1.2	NO
TCGA-55-8511-01	7.5908	2						73	R-Upper		TCGA-55-8511-F66028	TCGA-55-8511				-26986			0	552	460		31	2					Scheduled Follow-up Submission	Progressive Disease	2014-10-01	FEMALE	Lung Adenocarcinoma- Not Otherwise Specified (NOS)	No	C34.1	8140-03-01	C34.1	YES				70						NO
TCGA-55-8512-01	6.2523	1						41	R-Lower		TCGA-55-8512-F64286	TCGA-55-8512				-15266		607	0	3				1					Scheduled Follow-up Submission	Progressive Disease	2014-08-28	MALE	Lung Bronchioloalveolar Carcinoma Nonmucinous	No	C34.3	8252-03-01	C34.3	YES				90						NO
TCGA-55-8513-01	6.0515	1						77	L-Lower		TCGA-55-8513-F64283	TCGA-55-8513	TCGA-55-8513-01A			-28284			0	791	317		65	2	YES			YES	Scheduled Follow-up Submission	Stable Disease	2014-08-28	FEMALE	Mucinous (Colloid) Carcinoma	No	C34.30	8480-03-01	C34.3	YES		0.9	NO	60					1	NO	Distant Metastasis
TCGA-55-8514-01	4.4662	1						70	R-Upper		TCGA-55-8514-F57917	TCGA-55-8514				-25608			0	520			90						Scheduled Follow-up Submission	Complete Remission/Response	2014-03-28	FEMALE	Lung Adenocarcinoma- Not Otherwise Specified (NOS)	No	C34.1	8140-03-01	C34.1	YES										NO
TCGA-55-8614-01	7.5057	2						76	L-Upper		TCGA-55-8614-F47843	TCGA-55-8614	TCGA-55-8614-01A			-27924			0	536			113						Scheduled Follow-up Submission	Complete Remission/Response	2013-08-29	MALE	Lung Adenocarcinoma- Not Otherwise Specified (NOS)	No	C34.1	8140-03-01	C34.1	YES		0.4	NO						0.7	NO
TCGA-55-8615-01	7.412	2						67	R-Middle		TCGA-55-8615-F56254	TCGA-55-8615	TCGA-55-8615-01A			-24786			0	446	224		83						Scheduled Follow-up Submission	Progressive Disease	2014-01-30	MALE	Lung Adenocarcinoma- Not Otherwise Specified (NOS)	No	C34.2	8140-03-01	C34.2	YES		0.9	NO						0.9	NO	Distant Metastasis
TCGA-55-8616-01	6.605	1						58	R-Upper			TCGA-55-8616	TCGA-55-8616-01A			-21225			0	48				0							2012-12-28	FEMALE	Lung Adenocarcinoma- Not Otherwise Specified (NOS)	No	C34.1	8140-03-01	C34.1	YES		0.4	NO						0.5
TCGA-55-8619-01	6.4229	1						72	R-Lower		TCGA-55-8619-F57919	TCGA-55-8619	TCGA-55-8619-01A			-26616			0	416									Scheduled Follow-up Submission	Complete Remission/Response	2014-03-28	FEMALE	Mucinous (Colloid) Carcinoma	No	C34.30	8480-03-01	C34.3	YES		0.8	NO	90					1.2	NO
TCGA-55-8620-01	7.6129	2						60	L-Upper		TCGA-55-8620-F59081	TCGA-55-8620	TCGA-55-8620-01A			-22091		375	0	66			64	2	NO			NO	Scheduled Follow-up Submission	Progressive Disease	2014-04-30	MALE	Lung Adenocarcinoma- Not Otherwise Specified (NOS)	No	C34.1	8140-03-01	C34.1	YES		0.8	NO	70	NO			Central Lung	1	NO
TCGA-55-8621-01	6.5643	1						75	L-Lower		TCGA-55-8621-F48791	TCGA-55-8621	TCGA-55-8621-01A			-27485			0	515				1					Scheduled Follow-up Submission	Complete Remission/Response	2013-09-20	FEMALE	Lung Adenocarcinoma- Not Otherwise Specified (NOS)	No	C34.3	8140-03-01	C34.3	YES		0.6	NO	90					0.7	NO
TCGA-55-A48X-01	6.942	1						63	L-Lower		TCGA-55-A48X-F61500	TCGA-55-A48X	TCGA-55-A48X-01A	615		-23341	111		0	689	615		79						Scheduled Follow-up Submission	Complete Remission/Response	2014-06-30	FEMALE	Lung Adenocarcinoma- Not Otherwise Specified (NOS)	No	C34.3	8140-03-01	C34.3	YES	30		NO							NO	New Primary Tumor
TCGA-55-A48Y-01	7.1429	2						69	L-Lower		TCGA-55-A48Y-F59057	TCGA-55-A48Y	TCGA-55-A48Y-01A			-25384	107		0	630			42						Scheduled Follow-up Submission	Complete Remission/Response	2014-04-30	MALE	Lung Adenocarcinoma- Not Otherwise Specified (NOS)	No	C34.3	8140-03-01	C34.3	YES	10		NO							NO
TCGA-55-A48Z-01	6.8768	1						60	R-Upper		TCGA-55-A48Z-F59061	TCGA-55-A48Z	TCGA-55-A48Z-01A			-22056	64		0	651	536		110	2	YES	Other	FISH	YES	Scheduled Follow-up Submission		2014-04-30	FEMALE	Lung Adenocarcinoma Mixed Subtype	No	C34.1	8255-03-01	C34.1	YES	70		NO	70	YES	NO		Central Lung		NO	Distant Metastasis
TCGA-55-A490-01	6.2769	1						78	R-Upper		TCGA-55-A490-F59076	TCGA-55-A490				-28728		99	0	48			40	1	YES		FISH	YES	Scheduled Follow-up Submission		2014-04-30	MALE	Lung Adenocarcinoma- Not Otherwise Specified (NOS)	No	C34.1	8140-03-01	C34.1	YES				80	YES	YES	G12C	Peripheral Lung		NO
TCGA-55-A491-01	7.6151	2						81	L-Lower		TCGA-55-A491-F60134	TCGA-55-A491	TCGA-55-A491-01A			-29593	31		0	626			68	2	NO			NO	Scheduled Follow-up Submission	Complete Remission/Response	2014-05-29	FEMALE	Lung Adenocarcinoma- Not Otherwise Specified (NOS)	No	C34.3	8140-03-01	C34.3	YES	10		NO	80	NO					NO
TCGA-55-A492-01	6.0345	1						70	R-Upper		TCGA-55-A492-F60135	TCGA-55-A492				-25719			0	596			52	2	NO			NO	Scheduled Follow-up Submission	Complete Remission/Response	2014-05-29	FEMALE	Lung Adenocarcinoma- Not Otherwise Specified (NOS)	No	C34.1	8140-03-01	C34.1	YES				80	NO					NO
TCGA-55-A493-01	8.1118	2						54	R-Upper			TCGA-55-A493				-20027			0	28			102		NO			NO			2013-02-21	FEMALE	Lung Adenocarcinoma- Not Otherwise Specified (NOS)	No	C34.1	8140-03-01	C34.1	YES					NO
TCGA-55-A494-01	6.6546	1						61	R-Lower		TCGA-55-A494-F59038	TCGA-55-A494	TCGA-55-A494-01A			-22540	28		0	481			76	1	YES		FISH	YES	Scheduled Follow-up Submission	Complete Remission/Response	2014-04-30	FEMALE	Lung Adenocarcinoma- Not Otherwise Specified (NOS)	No	C34.3	8140-03-01	C34.3	YES	60		NO	80	YES	YES	G12D	Peripheral Lung		NO
TCGA-55-A4DF-01	7.3245	2						88	R-Lower		TCGA-55-A4DF-F59072	TCGA-55-A4DF				-32432		614	0	47	515		82						Scheduled Follow-up Submission	Progressive Disease	2014-04-30	MALE	Lung Adenocarcinoma- Not Otherwise Specified (NOS)	No	C34.3	8140-03-01	C34.3	YES										NO	Distant Metastasis
TCGA-55-A4DG-01	5.6796	1						71	R-Upper		TCGA-55-A4DG-F59047	TCGA-55-A4DG	TCGA-55-A4DG-01A			-26044	229		0	608			61						Scheduled Follow-up Submission	Complete Remission/Response	2014-04-30	MALE	Lung Adenocarcinoma- Not Otherwise Specified (NOS)	No	C34.1	8140-03-01	C34.1	YES	50		NO							NO
TCGA-55-A57B-01	6.9048	1						80	L-Upper		TCGA-55-A57B-F60133	TCGA-55-A57B	TCGA-55-A57B-01A			-29452	64		0	546			77	0	NO			NO	Scheduled Follow-up Submission	Complete Remission/Response	2014-05-29	FEMALE	Lung Adenocarcinoma Mixed Subtype	No	C34.1	8255-03-01	C34.1	YES	70		NO	90	NO			Peripheral Lung		NO
TCGA-62-8394-01	7.4782	2						65	L-Lower			TCGA-62-8394	TCGA-62-8394-01A			-23758		139	0						NO			NO			2012-07-05	FEMALE	Lung Adenocarcinoma Mixed Subtype	No	C34.3	8255-03-01	C34.3	YES		0.6	NO	100	NO			Central Lung	0.7
TCGA-62-8395-01	6.9017	1						80	R-Upper		TCGA-62-8395-F42099	TCGA-62-8395	TCGA-62-8395-01A			-29311			0	1216	395			0	YES			NO	Scheduled Follow-up Submission	Progressive Disease	2013-05-15	FEMALE	Lung Adenocarcinoma Mixed Subtype	No	C34.1	8255-03-01	C34.1	YES		0.6	NO	100	NO			Central Lung	1	NO	Locoregional Recurrence
TCGA-62-8397-01	5.7355	1						70	R-Lower		TCGA-62-8397-F42100	TCGA-62-8397	TCGA-62-8397-01A			-25728			0	1289				0	NO			NO	Scheduled Follow-up Submission	Complete Remission/Response	2013-05-15	FEMALE	Lung Adenocarcinoma Mixed Subtype	No	C34.3	8255-03-01	C34.3	YES		0.5	NO	90	NO			Peripheral Lung	0.6	NO
TCGA-62-8398-01	7.8629	2						55	R-Lower			TCGA-62-8398	TCGA-62-8398-01A			-20197		444	0						NO			NO			2012-07-04	MALE	Lung Adenocarcinoma Mixed Subtype	No	C34.3	8255-03-01	C34.3	YES		0.6	NO	100	NO			Central Lung	1
TCGA-62-8399-01	8.8035	2						62	L-Upper		TCGA-62-8399-F52545	TCGA-62-8399				-22952			0	2696					NO			NO	Scheduled Follow-up Submission	Complete Remission/Response	2013-12-04	MALE	Lung Papillary Adenocarcinoma	No	C34.1	8255-03-01	C34.1	YES				100	NO			Peripheral Lung		NO
TCGA-62-8402-01	7.9863	2						73	R-Upper		TCGA-62-8402-F52547	TCGA-62-8402	TCGA-62-8402-01A			-26934		1498	0	1445	772			0	YES	Exon 19 Deletion		NO	Scheduled Follow-up Submission	Progressive Disease	2013-12-04	FEMALE	Lung Adenocarcinoma Mixed Subtype	No	C34.1	8255-03-01	C34.1	YES		0.6	NO	100	NO			Peripheral Lung	0.7	NO	Distant Metastasis
TCGA-62-A46O-01	8.0562	2						65	R-Lower			TCGA-62-A46O	TCGA-62-A46O-01A			-24050	2349	1454	0						NO			NO			2012-10-29	FEMALE	Lung Adenocarcinoma- Not Otherwise Specified (NOS)	No	C34.3	8140-03-01	C34.3	YES	70		NO	100	NO			Central Lung
TCGA-62-A46P-01	5.8166	1						65	L-Upper			TCGA-62-A46P	TCGA-62-A46P-01A			-23993	2254	594	0						NO			NO			2012-10-29	MALE	Lung Adenocarcinoma Mixed Subtype	No	C34.1	8255-03-01	C34.1	YES	90		NO	100	NO			Central Lung
TCGA-62-A46R-01	6.8724	1						54	L-Lower			TCGA-62-A46R	TCGA-62-A46R-01A			-20063	2071	1725	0						NO			NO			2012-10-29	FEMALE	Lung Adenocarcinoma Mixed Subtype	No	C34.3	8255-03-01	C34.3	YES	100		NO	100	NO			Central Lung
TCGA-62-A46S-01	6.4431	1						73	L-Upper			TCGA-62-A46S	TCGA-62-A46S-01A			-26825	1936	1653	0					0	NO			NO			2012-10-29	MALE	Lung Papillary Adenocarcinoma	No	C34.1	8260-03-01	C34.1	YES	150		NO	100	NO			Peripheral Lung
TCGA-62-A46U-01	6.663	1						71	R-Lower		TCGA-62-A46U-F51441	TCGA-62-A46U	TCGA-62-A46U-01A			-25998	1834		0	2067					NO			NO	Scheduled Follow-up Submission	Complete Remission/Response	2013-11-19	FEMALE	Lung Adenocarcinoma Mixed Subtype	No	C34.3	8255-03-01	C34.3	YES	70		NO	100	NO			Central Lung		NO
TCGA-62-A46V-01	5.9167	1						78	L-Lower		TCGA-62-A46V-F51440	TCGA-62-A46V	TCGA-62-A46V-01A			-28495	1751		0	2199					NO			NO	Scheduled Follow-up Submission	Complete Remission/Response	2013-11-19	FEMALE	Lung Adenocarcinoma Mixed Subtype	No	C34.3	8255-03-01	C34.3	YES	100		NO	90	NO			Peripheral Lung		NO
TCGA-62-A46Y-01	6.5639	1						70	R-Lower			TCGA-62-A46Y	TCGA-62-A46Y-01A			-25905	1608	414	0						NO			NO			2012-10-30	FEMALE	Lung Adenocarcinoma Mixed Subtype	No	C34.3	8255-03-01	C34.3	YES	80		NO	90	NO			Peripheral Lung
TCGA-62-A470-01	6.264	1						84	R-Upper			TCGA-62-A470	TCGA-62-A470-01A			-30689	1310	1194	0					0	NO			NO			2012-10-30	MALE	Lung Acinar Adenocarcinoma	No	C34.1	8550-03-01	C34.1	YES	80		NO	100	NO			Central Lung
TCGA-62-A471-01	7.5331	2						64	L-Upper		TCGA-62-A471-F51439	TCGA-62-A471	TCGA-62-A471-01A			-23689	951		0	1246				0	NO			NO	Scheduled Follow-up Submission	Complete Remission/Response	2013-11-19	MALE	Lung Adenocarcinoma- Not Otherwise Specified (NOS)	No	C34.1	8140-03-01	C34.1	YES	130		NO	100	NO			Peripheral Lung		NO
TCGA-62-A472-01	6.9441	1						70	R-Lower		TCGA-62-A472-F51442	TCGA-62-A472	TCGA-62-A472-01A			-25893	498		0	910	290			1	NO			NO	Scheduled Follow-up Submission	Partial Remission/Response	2013-11-19	MALE	Lung Adenocarcinoma- Not Otherwise Specified (NOS)	No	C34.3	8140-03-01	C34.3	YES	80		NO	80	NO			Central Lung		NO	Locoregional Recurrence
TCGA-64-1676-01	6.4523	1	3.41	0.36	Adenocarcinoma, NOS	Adenocarcinoma, NOS		58	R-Lower		TCGA-64-1676-F4366	TCGA-64-1676	TCGA-64-1676-01A			-21428			0	1728										Complete Remission/Response	2010-11-15	MALE	Lung Adenocarcinoma- Not Otherwise Specified (NOS)	No	C34.3	8140-03-01	C34.3	YES		0.5	NO					Central Lung	1.5
TCGA-64-1677-01	7.6398	2	2.68	0.32	Adenocarcinoma, NOS	Adenocarcinoma, NOS		77	R-Lower		TCGA-64-1677-F8691	TCGA-64-1677	TCGA-64-1677-01A			-28482		628	0		360										2011-02-18	FEMALE	Lung Adenocarcinoma- Not Otherwise Specified (NOS)	No	C34.1	8140-03-01	C34.1	YES		0.5	NO	0					1
TCGA-64-1678-01	8.6879	2	3.11	0.57	Adenocarcinoma, NOS	Adenocarcinoma, NOS		70	R-Middle		TCGA-64-1678-F4371	TCGA-64-1678	TCGA-64-1678-01A			-25931			0	1189										Complete Remission/Response	2010-11-15	FEMALE	Lung Adenocarcinoma- Not Otherwise Specified (NOS)	No	C34.1	8140-03-01	C34.1	YES		0.8	NO						1
TCGA-64-1679-01	7.1773	2	1.73	0.42	Acinar predominant Adc	Acinar predominant Adc		58	R-Upper		TCGA-64-1679-F66261	TCGA-64-1679	TCGA-64-1679-01A			-21310			0	2488				0					Scheduled Follow-up Submission	Complete Remission/Response	2014-10-07	FEMALE	Lung Adenocarcinoma- Not Otherwise Specified (NOS)	No	C34.1	8140-03-01	C34.1	YES		0.5	NO		NO				1	NO
TCGA-64-1680-01	7.116	2	3.41	0.63	Acinar predominant Adc	Acinar predominant Adc		63	R-Middle		TCGA-64-1680-F4387	TCGA-64-1680	TCGA-64-1680-01A			-23267			0	1126											2010-11-16	MALE	Lung Adenocarcinoma Mixed Subtype	No	C34.8	8255-03-01	C34.8	YES		0.4	NO						1.2
TCGA-64-1681-01	6.3898	1	2.97	0.44	Acinar predominant Adc	Acinar predominant Adc		61	R-Upper		TCGA-64-1681-F20365	TCGA-64-1681	TCGA-64-1681-01A			-22525		1167	0		439				YES	Exon 19 Deletion			Additional New Tumor Event		2011-12-21	FEMALE	Lung Adenocarcinoma- Not Otherwise Specified (NOS)	No	C34.1	8140-03-01	C34.9	YES		0.4	NO	0	YES	NO			0.8
TCGA-64-5774-01	8.5201	2	2.84	0.76	Adenocarcinoma, NOS	Adenocarcinoma, NOS		60	R-Middle		TCGA-64-5774-F31478	TCGA-64-5774	TCGA-64-5774-01A			-22059			0	2676	277		95						Additional New Tumor Event		2012-05-03	MALE	Lung Adenocarcinoma- Not Otherwise Specified (NOS)	No	C34.0	8140-03-01	C34.0	YES		0.6	NO					Central Lung	1.4		Distant Metastasis
TCGA-64-5775-01	7.6193	2	3.39	0.71	Adenocarcinoma, NOS	Adenocarcinoma, NOS		71	L-Upper		TCGA-64-5775-F11418	TCGA-64-5775	TCGA-64-5775-01A			-26058		62	0											Progressive Disease	2011-05-02	MALE	Lung Adenocarcinoma- Not Otherwise Specified (NOS)	Yes	C34.1	8140-03-01	C34.1	YES		1.2	NO	0					1.3
TCGA-64-5778-01	6.8113	1	3.45	0.42	Adenocarcinoma, NOS	Adenocarcinoma, NOS		60	R-Upper		TCGA-64-5778-F31471	TCGA-64-5778	TCGA-64-5778-01A			-21927			0	1305	1168			1					Additional New Tumor Event	Progressive Disease	2012-05-03	MALE	Lung Bronchioloalveolar Carcinoma Nonmucinous	No	C34.1	8252-03-01	C34.1	YES		0.4	NO	0				Central Lung	1.2	NO
TCGA-64-5779-01	8.323	2						61	L-Lower		TCGA-64-5779-F31473	TCGA-64-5779	TCGA-64-5779-01A		797	-22305			0	864	795		100	0					Additional New Tumor Event		2012-05-03	MALE	Lung Acinar Adenocarcinoma	No	C34.3	8550-03-01	C34.3	YES		1	NO					Central Lung	1.3		Distant Metastasis
TCGA-64-5781-01	7.3152	2	1.9	0.38	Adenocarcinoma, NOS	Adenocarcinoma, NOS		55	R-Upper		TCGA-64-5781-F31490	TCGA-64-5781	TCGA-64-5781-01A		112	-20219			0	1559	96		73	0					Additional New Tumor Event	Complete Remission/Response	2012-05-03	FEMALE	Lung Adenocarcinoma Mixed Subtype	No	C34.1	8255-03-01	C34.1	YES		0.8	NO					Central Lung	1		Distant Metastasis
TCGA-64-5815-01	6.4824	1						74	R-Upper		TCGA-64-5815-F31480	TCGA-64-5815				-27280			0	866			87	1	YES				Scheduled Follow-up Submission		2012-05-03	MALE	Lung Adenocarcinoma Mixed Subtype	No	C34.1	8255-03-01	C34.1	YES					YES			Central Lung
TCGA-67-3770-01	6.5645	1						70	R-Upper			TCGA-67-3770	TCGA-67-3770-01A			-25658			0	610					NO			NO			2010-12-00	FEMALE	Lung Adenocarcinoma- Not Otherwise Specified (NOS)	No	C34.1	8140-03-01	C34.1	YES		0.8	NO		NO			Central Lung	0.9
TCGA-67-3771-01	7.6797	2	2.87	0.46	Solid predominant Adc	Solid predominant Adc		77	L-Upper			TCGA-67-3771	TCGA-67-3771-01A			-28406			0	610					NO			NO			2011-01-21	FEMALE	Lung Adenocarcinoma- Not Otherwise Specified (NOS)	No	C34.1	8140-03-01	C34.1	YES		0.7	NO		NO			Central Lung	1.1
TCGA-67-3772-01	6.2277	1	1.89	0.43	Acinar predominant Adc	Acinar predominant Adc		82	R-Upper			TCGA-67-3772	TCGA-67-3772-01A			-29989			0	573					NO			NO			2011-03-03	FEMALE	Lung Adenocarcinoma- Not Otherwise Specified (NOS)	No	C34.1	8140-03-01	C34.1	YES		0.9	NO		NO				0.9
TCGA-67-3773-01	6.1213	1	1.96	0.69	Solid predominant Adc	Solid predominant Adc		84	L-Lower			TCGA-67-3773	TCGA-67-3773-01A			-30706			0	427					NO			NO			2011-01-21	FEMALE	Lung Adenocarcinoma- Not Otherwise Specified (NOS)	No	C34.3	8140-03-01	C34.3	YES		0.4	NO		NO			Central Lung	1
TCGA-67-3774-01	6.7214	1	1.89	0.48	Papillary predominant Adc	Papillary predominant Adc		73	L-Lower			TCGA-67-3774	TCGA-67-3774-01A			-26704			0	385					NO			NO			2011-03-03	FEMALE	Lung Adenocarcinoma- Not Otherwise Specified (NOS)	No	C34.3	8140-03-01	C34.3	YES		0.4	NO		NO				0.5
TCGA-67-4679-01	5.6454	1						69	R-Lower			TCGA-67-4679	TCGA-67-4679-01B			-25202			0	448					NO			NO			2011-01-21	MALE	Lung Adenocarcinoma- Not Otherwise Specified (NOS)	No	C34.3	8140-03-01	C34.3	YES		0.5	NO		NO			Central Lung	0.9
TCGA-67-6215-01	6.4545	1	2.24	0.71	Papillary predominant Adc	Papillary predominant Adc		52	R-Lower		TCGA-67-6215-F13585	TCGA-67-6215	TCGA-67-6215-01A			-19310			0	174				2	NO			NO	Scheduled Follow-up Submission		2011-07-06	FEMALE	Lung Adenocarcinoma- Not Otherwise Specified (NOS)	No	C34.3	8140-03-01	C34.3	YES		0.5	NO		NO			Central Lung	0.6
TCGA-67-6216-01	6.5766	1	3.89	0.39	Micropapillary predom Adc	Micropapillary predom Adc		57	R-Middle		TCGA-67-6216-F13587	TCGA-67-6216	TCGA-67-6216-01A			-20967			0	141					NO			NO	Scheduled Follow-up Submission		2011-07-06	FEMALE	Lung Adenocarcinoma- Not Otherwise Specified (NOS)	No	C34.2	8140-03-01	C34.2	YES		0.6	NO		NO			Central Lung	1.2
TCGA-67-6217-01	6.0599	1			Acinar predominant Adc	Acinar predominant Adc		73	L-Upper		TCGA-67-6217-F13566	TCGA-67-6217	TCGA-67-6217-01A			-26920			0	422	296				YES	L858R	RT-PCR	YES	Scheduled Follow-up Submission	Progressive Disease	2011-07-05	FEMALE	Lung Adenocarcinoma- Not Otherwise Specified (NOS)	No	C34.1	8140-03-01	C34.1	YES		0.7	NO		YES	NO		Central Lung	1.1
TCGA-69-7760-01	7.2504	2			Acinar predominant Adc	Acinar predominant Adc		73	R-Lower		TCGA-69-7760-F29247	TCGA-69-7760	TCGA-69-7760-01A			-26777			0	202			125		YES			NO	Scheduled Follow-up Submission		2012-03-13	MALE	Lung Adenocarcinoma Mixed Subtype	No	C34.3	8255-03-01	C34.3	YES		0.7	NO		NO			Peripheral Lung	1.1
TCGA-69-7761-01	6.7341	1			Acinar predominant Adc	Acinar predominant Adc		84	L-Lower		TCGA-69-7761-F29252	TCGA-69-7761	TCGA-69-7761-01A			-31041			0	186			80	1	YES	Other			Scheduled Follow-up Submission		2012-03-13	MALE	Lung Acinar Adenocarcinoma	No	C34.3	8550-03-01	C34.3	YES		0.7	NO					Peripheral Lung	1.3
TCGA-69-7763-01	6.8673	1			Lepidic predominant Adc	Lepidic predominant Adc		69	R-Middle		TCGA-69-7763-F20990	TCGA-69-7763				-25316			0	690			72	1	NO			NO	Scheduled Follow-up Submission		2012-01-26	MALE	Lung Adenocarcinoma Mixed Subtype	No	C34.2	8550-03-01	C34.2	YES					NO			Peripheral Lung
TCGA-69-7764-01	7.2038	2			Acinar predominant Adc	Acinar predominant Adc		75	R-Upper		TCGA-69-7764-F20992	TCGA-69-7764	TCGA-69-7764-01A			-27693			0	414				0	YES			NO	Scheduled Follow-up Submission		2012-01-26	MALE	Lung Adenocarcinoma Mixed Subtype	No	C34.1	8255-03-01	C34.1	YES		0.6	NO		NO			Peripheral Lung	0.6
TCGA-69-7765-01	6.9476	1			Acinar predominant Adc	Acinar predominant Adc		56	R-Upper		TCGA-69-7765-F29244	TCGA-69-7765				-20625			0	165			45		NO	Other		NO	Scheduled Follow-up Submission		2012-03-13	MALE	Lung Adenocarcinoma Mixed Subtype	No	C34.1	8255-03-01	C34.1	YES					NO			Peripheral Lung
TCGA-69-7973-01	8.1441	2						42	R-Middle		TCGA-69-7973-F30347	TCGA-69-7973	TCGA-69-7973-01A			-15355			0	230				1	YES				Scheduled Follow-up Submission	Complete Remission/Response	2012-04-09	FEMALE	Lung Adenocarcinoma Mixed Subtype	No	C34.2	8255-03-01	C34.2	YES		0.6	NO					Central Lung	0.9
TCGA-69-7974-01	7.0486	2						54	L-Upper		TCGA-69-7974-F30365	TCGA-69-7974				-20021			0	184					YES	Other			Scheduled Follow-up Submission	Progressive Disease	2012-04-09	FEMALE	Lung Adenocarcinoma Mixed Subtype	No	C34.1	8255-03-01	C34.1	YES				80				Peripheral Lung
TCGA-69-7978-01	7.0554	2						59	R-Upper		TCGA-69-7978-F39911	TCGA-69-7978				-21785			0	134					YES	Other			Scheduled Follow-up Submission	Stable Disease	2013-02-11	MALE	Lung Adenocarcinoma Mixed Subtype	No	C34.1	8255-03-01	C34.1	YES								Peripheral Lung		NO
TCGA-69-7979-01	7.3042	2						71	R-Upper		TCGA-69-7979-F40026	TCGA-69-7979				-26180			0	408					NO			NO			2014-03-19	FEMALE	Lung Acinar Adenocarcinoma	No	C34.1	8550-03-01	C34.1	YES					NO
TCGA-69-7980-01	7.5377	2			0	Acinar predominant Adc		70	R-Upper		TCGA-69-7980-F57659	TCGA-69-7980	TCGA-69-7980-01A			-25583			0	362			71		YES	Other		NO	Scheduled Follow-up Submission		2014-03-19	FEMALE	Lung Adenocarcinoma- Not Otherwise Specified (NOS)	No	C34.1	8550-03-01	C34.1	YES		1.2	NO		NO				1.6	NO
TCGA-69-8253-01	6.2552	1						59	R-Lower		TCGA-69-8253-F41949	TCGA-69-8253	TCGA-69-8253-01A			-21771			0	426				1	NO			NO	Scheduled Follow-up Submission	Complete Remission/Response	2013-04-05	FEMALE	Lung Adenocarcinoma Mixed Subtype	No	C34.3	8255-03-01	C34.3	YES		0.6	NO		NO				1.2	NO
TCGA-69-8254-01	5.7774	1						85	R-Lower		TCGA-69-8254-F41950	TCGA-69-8254	TCGA-69-8254-01A			-31134			0	409				0	YES	Other		NO	Scheduled Follow-up Submission	Complete Remission/Response	2013-04-05	MALE	Lung Adenocarcinoma Mixed Subtype	No	C34.3	8255-03-01	C34.3	YES		0.7	NO	80	NO				1.4	NO
TCGA-69-8255-01	8.8389	2						71	R-Upper		TCGA-69-8255-F32611	TCGA-69-8255	TCGA-69-8255-01A			-26289			0	129			60		YES	Other		NO	Scheduled Follow-up Submission		2012-06-04	MALE	Lung Solid Pattern Predominant Adenocarcinoma	No	C34.1	8230-03-01	C34.1	YES		0.8	NO		NO				1	NO
TCGA-69-8453-01	6.323	1						77	R-Lower		TCGA-69-8453-F58885	TCGA-69-8453				-28413			0	813			52	1					Scheduled Follow-up Submission		2014-04-25	MALE	Mucinous (Colloid) Carcinoma	No	C34.30	8480-03-01	C34.3	YES								Peripheral Lung		NO
TCGA-69-A59K-01	7.2925	2						60	R-Upper		TCGA-69-A59K-F57660	TCGA-69-A59K	TCGA-69-A59K-01A			-22093	130		0	522			75	2	YES			NO	Scheduled Follow-up Submission		2014-03-19	FEMALE	Lung Adenocarcinoma Mixed Subtype	No	C34.1	8255-03-01	C34.1	YES	140		NO							NO
TCGA-71-6725-01	6.2106	1	2.69	0.63	Micropapillary predom Adc	Micropapillary predom Adc		48	R-Upper		TCGA-71-6725-F70928	TCGA-71-6725	TCGA-71-6725-01A			-17793			0	256	164			2					Scheduled Follow-up Submission	Progressive Disease	2015-03-10	FEMALE	Lung Papillary Adenocarcinoma	No	C34.1	8260-03-01	C34.1	YES		1	NO	60					2	NO	Locoregional Recurrence
TCGA-71-8520-01	7.1966	2						60	L-Upper		TCGA-71-8520-F70925	TCGA-71-8520	TCGA-71-8520-01A			-21921		210	0	3	179								Scheduled Follow-up Submission	Progressive Disease	2015-03-10	FEMALE	Lung Adenocarcinoma- Not Otherwise Specified (NOS)	No	C34.1	8140-03-01	C34.1	YES		0.7	NO	40	YES	NO			0.9	NO	Locoregional Recurrence
TCGA-73-4658-01	6.3513	1	2.01	0.32	Micropapillary predom Adc	Micropapillary predom Adc		80	L-Lower		TCGA-73-4658-F12975	TCGA-73-4658	TCGA-73-4658-01A			-29508		1600	0	1600					NO					Complete Remission/Response	2011-06-15	FEMALE	Lung Adenocarcinoma- Not Otherwise Specified (NOS)	No	C34.3	8140-03-01	C34.3	YES		1	NO		NO			Central Lung	1.4
TCGA-73-4659-01	7.6672	2	3.54	0.33	Acinar predominant Adc	Acinar predominant Adc		66	R-Upper		TCGA-73-4659-F42024	TCGA-73-4659				-24253		711	0	711	316			0	NO			NO	Scheduled Follow-up Submission	Progressive Disease	2013-04-09	MALE	Lung Adenocarcinoma- Not Otherwise Specified (NOS)	No	C34.1	8140-03-01	C34.9	YES				0	NO			Central Lung		NO	Distant Metastasis
TCGA-73-4662-01	7.6075	2	3	0.49	Acinar predominant Adc	Acinar predominant Adc		65	L-Upper		TCGA-73-4662-F71029	TCGA-73-4662				-23762			0	2515			116	0	NO			NO	Scheduled Follow-up Submission	Complete Remission/Response	2015-03-18	FEMALE	Lung Adenocarcinoma- Not Otherwise Specified (NOS)	No	C34.1	8140-03-01	C34.1	YES				100	NO			Peripheral Lung		NO
TCGA-73-4666-01	8.1402	2						52	R-Upper		TCGA-73-4666-F12865	TCGA-73-4666			-43	-19074			0	800				1	NO			NO		Complete Remission/Response	2011-06-10	FEMALE	Lung Adenocarcinoma- Not Otherwise Specified (NOS)	No	C34.1	8140-03-01	C34.1	YES				80	NO			Central Lung
TCGA-73-4668-01	7.3069	2						66	L-Upper		TCGA-73-4668-F7958	TCGA-73-4668	TCGA-73-4668-01A			-24255			0	467	282			0	NO			NO		Stable Disease	2011-01-06	FEMALE	Lung Micropapillary Adenocarcinoma	No	C34.1	8507-03-01	C34.1	YES		0.3	NO	80	NO			Peripheral Lung	0.6
TCGA-73-4670-01	7.9452	2						69	L-Upper		TCGA-73-4670-F12983	TCGA-73-4670	TCGA-73-4670-01A			-25526			0	131				2	NO			NO			2011-06-15	FEMALE	Lung Adenocarcinoma- Not Otherwise Specified (NOS)	No	C34.1	8140-03-01	C34.1	YES		1	NO	50	NO			Peripheral Lung	1.2
TCGA-73-4675-01	6.3925	1	3.47	0.58	Micropapillary predom Adc	Micropapillary predom Adc		59	L-Lower		TCGA-73-4675-F71055	TCGA-73-4675	TCGA-73-4675-01A			-21614		922	0	40	361		69	0	NO			NO	Scheduled Follow-up Submission	Progressive Disease	2015-03-17	MALE	Lung Adenocarcinoma- Not Otherwise Specified (NOS)	No	C34.3	8140-03-01	C34.3	YES		1.1	NO		NO			Peripheral Lung	1.6	NO	Locoregional Recurrence
TCGA-73-4676-01	7.43	2	2.57	0.52	Solid predominant Adc	Solid predominant Adc		45	R-Upper		TCGA-73-4676-F71022	TCGA-73-4676	TCGA-73-4676-01A			-16746		281	0	122			86	1	NO			NO	Scheduled Follow-up Submission		2015-03-18	MALE	Lung Adenocarcinoma- Not Otherwise Specified (NOS)	Yes	C34.1	8140-03-01	C34.1	YES		0.7	NO	70	NO			Peripheral Lung	1.5	NO
TCGA-73-4677-01	6.6668	1						74	R-Upper		TCGA-73-4677-F12744	TCGA-73-4677	TCGA-73-4677-01A			-27381		38	0					1	NO			NO			2011-06-01	MALE	Lung Adenocarcinoma- Not Otherwise Specified (NOS)	No	C34.1	8140-03-01	C34.1	YES		0.7	NO	80	NO			Peripheral Lung	0.9
TCGA-73-7498-01	6.6579	1			0	Acinar predominant Adc		58	R-Lower		TCGA-73-7498-F48755	TCGA-73-7498	TCGA-73-7498-01A			-21527			0	1189			74	0	NO			NO	Scheduled Follow-up Submission	Complete Remission/Response	2013-09-20	FEMALE	Lung Bronchioloalveolar Carcinoma Nonmucinous	No	C34.3	8252-03-01	C34.3	YES		0.6	NO	100	NO			Peripheral Lung	1	NO
TCGA-73-7499-01	7.0707	2			0	Acinar predominant Adc		81	R-Upper		TCGA-73-7499-F69827	TCGA-73-7499	TCGA-73-7499-01A		1451	-29683		1531	0	519	1447		54	3	NO			NO	Scheduled Follow-up Submission	Complete Remission/Response	2015-01-21	FEMALE	Lung Adenocarcinoma Mixed Subtype	No	C34.1	8255-03-01	C34.1	YES		0.9	NO	40	NO			Peripheral Lung	2.3	NO	Distant Metastasis
TCGA-73-A9RS-01	7.9606	2						41	R-Upper		TCGA-73-A9RS-F64487	TCGA-73-A9RS	TCGA-73-A9RS-01A			-15162	162	340	0	305				1	YES		FISH	YES	Scheduled Follow-up Submission	Progressive Disease	2014-09-03	MALE	Lung Adenocarcinoma- Not Otherwise Specified (NOS)	No	C34.1	8480-03-01	C34.1	YES	160		NO	80	YES	NO		Peripheral Lung		NO
TCGA-75-5122-01	7.3747	2	3.52	0.17	Solid predominant Adc	Solid predominant Adc			L-Upper		TCGA-75-5122-F11750	TCGA-75-5122	TCGA-75-5122-01A												NO			NO		Progressive Disease	2011-03-31	MALE	Lung Adenocarcinoma- Not Otherwise Specified (NOS)	No	C34.1	8140-03-01	C34.1	YES		0.8	NO	0	NO			Peripheral Lung	0.8
TCGA-75-5125-01	7.9372	2							R-Upper		TCGA-75-5125-F72028	TCGA-75-5125	TCGA-75-5125-01A					2027			1752				NO			NO	Scheduled Follow-up Submission	Progressive Disease	2015-04-02	MALE	Lung Adenocarcinoma- Not Otherwise Specified (NOS)	No	C34.1	8140-03-01	C34.1	YES		0.7	NO		NO			Peripheral Lung	1.6	NO
TCGA-75-5126-01	7.491	2	2.01	0.27	NSCLC, favor Adeno	NSCLC, favor Adeno			L-Upper		TCGA-75-5126-F11746	TCGA-75-5126	TCGA-75-5126-01A											1	NO			NO		Progressive Disease	2011-04-04	FEMALE	Lung Papillary Adenocarcinoma	No	C34.1	8260-03-01	C34.1	YES		0.7	NO		NO			Peripheral Lung	1.2
TCGA-75-5146-01	7.6522	2	1.8	0.57	Acinar predominant Adc	Acinar predominant Adc			R-Lower		TCGA-75-5146-F72030	TCGA-75-5146								2368	1773				NO			NO	Scheduled Follow-up Submission		2015-04-02	MALE	Lung Adenocarcinoma- Not Otherwise Specified (NOS)	No	C34.3	8252-03-01	C34.3	YES					NO			Peripheral Lung		NO	New Primary Tumor
TCGA-75-5147-01	7.4155	2	3.27	0.4	Acinar predominant Adc	Acinar predominant Adc			R-Upper		TCGA-75-5147-F72031	TCGA-75-5147								1333					NO			NO	Scheduled Follow-up Submission	Complete Remission/Response	2015-04-02	FEMALE	Lung Adenocarcinoma- Not Otherwise Specified (NOS)	No	C34.1	8252-03-01	C34.1	YES					NO			Peripheral Lung		NO
TCGA-75-6203-01	6.334	1	2.21	0.26	Invasive mucinous	Invasive mucinous	Y - unknown binding partner		L-Lower		TCGA-75-6203-F15862	TCGA-75-6203																		Complete Remission/Response	2011-08-15	FEMALE	Lung Adenocarcinoma- Not Otherwise Specified (NOS)	No	C34.3	8140-03-01	C34.3	YES
TCGA-75-6205-01	7.1444	2			Solid predominant Adc	Solid predominant Adc			L-Upper		TCGA-75-6205-F15083	TCGA-75-6205	TCGA-75-6205-01A																		2011-07-21	FEMALE	Lung Adenocarcinoma- Not Otherwise Specified (NOS)	No	C34.1	8140-03-01	C34.1	YES		0.5	NO					Peripheral Lung	0.7
TCGA-75-6206-01	7.2175	2							R-Upper		TCGA-75-6206-F72036	TCGA-75-6206	TCGA-75-6206-01A							2590									Scheduled Follow-up Submission	Complete Remission/Response	2015-04-02	MALE	Lung Adenocarcinoma- Not Otherwise Specified (NOS)	No	C34.1	8140-03-01	C34.1	YES		0.6	NO					Peripheral Lung	0.7	NO
TCGA-75-6207-01	7.1874	2	1.94	0.64	Solid predominant Adc	Solid predominant Adc			R-Upper		TCGA-75-6207-F15092	TCGA-75-6207	TCGA-75-6207-01A																		2011-07-21	MALE	Lung Adenocarcinoma- Not Otherwise Specified (NOS)	No	C34.1	8140-03-01	C34.9	YES		0.4	NO					Peripheral Lung	1
TCGA-75-6211-01	7.2962	2	3.1	0.39	Solid predominant Adc	Solid predominant Adc			Bronchial		TCGA-75-6211-F15095	TCGA-75-6211	TCGA-75-6211-01A																	Progressive Disease	2011-07-21	FEMALE	Lung Adenocarcinoma- Not Otherwise Specified (NOS)	No	C34.1	8140-03-01	C34.9	YES		0.6	NO						0.8
TCGA-75-6212-01	5.8083	1	2.76	0.41	Papillary predominant Adc	Papillary predominant Adc			L-Lower		TCGA-75-6212-F72037	TCGA-75-6212	TCGA-75-6212-01A					1516			1340			0					Scheduled Follow-up Submission	Progressive Disease	2015-04-02	FEMALE	Lung Micropapillary Adenocarcinoma	No	C34.3	8507-03-01	C34.3	YES		0.8	NO					Peripheral Lung	2.5	NO	New Primary Tumor
TCGA-75-6214-01	7.8932	2			Solid predominant Adc	Solid predominant Adc			R-Upper		TCGA-75-6214-F72038	TCGA-75-6214	TCGA-75-6214-01A		524			1115			419			0					Scheduled Follow-up Submission	Progressive Disease	2015-04-02	FEMALE	Lung Adenocarcinoma- Not Otherwise Specified (NOS)	No	C34.1	8140-03-01	C34.1	YES		0.8	NO					Peripheral Lung	1.9	NO	Distant Metastasis
TCGA-75-7025-01	5.5562	1	3.66	0.34	Acinar predominant Adc	Acinar predominant Adc			L-Lower		TCGA-75-7025-F72041	TCGA-75-7025	TCGA-75-7025-01A	1481	2092					3305	1481			0					Scheduled Follow-up Submission	Complete Remission/Response	2015-04-02	MALE	Lung Adenocarcinoma- Not Otherwise Specified (NOS)	No	C34.1	8140-03-01	C34.1	YES		0.5	NO					Peripheral Lung	0.6	NO	Locoregional Recurrence|Distant Metastasis
TCGA-75-7027-01	8.287	2	3.09	0.62	Solid predominant Adc	Solid predominant Adc			L-Lower		TCGA-75-7027-F72040	TCGA-75-7027	TCGA-75-7027-01A							3059	2949			0					Scheduled Follow-up Submission		2015-04-02	MALE	Lung Adenocarcinoma- Not Otherwise Specified (NOS)	No	C34.3	8140-03-01	C34.3	YES		0.7	NO					Peripheral Lung	1.4	NO	Locoregional Recurrence
TCGA-75-7030-01	6.3623	1	2.01	0.17	Papillary predominant Adc	Papillary predominant Adc			R-Lower		TCGA-75-7030-F15878	TCGA-75-7030	TCGA-75-7030-01A											0						Complete Remission/Response	2011-08-16	MALE	Lung Adenocarcinoma- Not Otherwise Specified (NOS)	No	C34.3	8140-03-01	C34.3	YES		0.6	NO					Peripheral Lung	0.6
TCGA-75-7031-01	6.4615	1	4.01	0.48	Acinar predominant Adc	Acinar predominant Adc			R-Upper		TCGA-75-7031-F15880	TCGA-75-7031	TCGA-75-7031-01A											0							2011-08-16	FEMALE	Lung Adenocarcinoma- Not Otherwise Specified (NOS)	No	C34.1	8140-03-01	C34.1	YES		0.6	NO					Peripheral Lung	0.9
TCGA-78-7143-01	6.7954	1			Adenocarcinoma, NOS	Adenocarcinoma, NOS		62	L-Upper		TCGA-78-7143-F16669	TCGA-78-7143	TCGA-78-7143-01A			-22673		4961	0		4608			0	NO			NO	Additional New Tumor Event		2011-09-23	FEMALE	Lung Bronchioloalveolar Carcinoma Nonmucinous	No	C34.1	8252-03-01	C34.1	YES		1	NO		NO			Central Lung	1.1
TCGA-78-7145-01	7.4984	2	2.04	0.78	Micropapillary predom Adc	Micropapillary predom Adc		52	R-Middle		TCGA-78-7145-F16671	TCGA-78-7145	TCGA-78-7145-01A			-19080		826	0		422			1	NO			NO	Scheduled Follow-up Submission	Progressive Disease	2011-09-23	FEMALE	Lung Adenocarcinoma- Not Otherwise Specified (NOS)	No	C34.2	8140-03-01	C34.2	YES		1	NO		NO			Peripheral Lung	1.4
TCGA-78-7146-01	8.421	2						71	L-Lower		TCGA-78-7146-F16969	TCGA-78-7146	TCGA-78-7146-01A			-26272		173	0					1	NO			NO	Scheduled Follow-up Submission		2011-09-28	FEMALE	Lung Adenocarcinoma Mixed Subtype	No	C34.3	8255-03-01	C34.3	YES		0.8	NO		NO			Peripheral Lung	0.8
TCGA-78-7147-01	6.8799	1	1.9	0.77	Acinar predominant Adc	Acinar predominant Adc		67	R-Upper		TCGA-78-7147-F16971	TCGA-78-7147	TCGA-78-7147-01A			-24809		586	0		578			1	NO			NO	Scheduled Follow-up Submission	Progressive Disease	2011-09-28	FEMALE	Lung Adenocarcinoma- Not Otherwise Specified (NOS)	No	C34.1	8140-03-01	C34.1	YES		0.8	NO		NO			Peripheral Lung	0.9
TCGA-78-7148-01	7.3517	2			Acinar predominant Adc	Acinar predominant Adc		71	L-Upper		TCGA-78-7148-F17170	TCGA-78-7148	TCGA-78-7148-01A		182	-25990		626	0		182			0	NO			NO	Scheduled Follow-up Submission		2011-10-04	MALE	Lung Adenocarcinoma Mixed Subtype	No	C34.1	8255-03-01	C34.1	YES		0.8	NO		NO			Peripheral Lung	0.9
TCGA-78-7149-01	5.5151	1	1.89	0.74	Papillary predominant Adc	Papillary predominant Adc		71	R-Lower		TCGA-78-7149-F46148	TCGA-78-7149	TCGA-78-7149-01A			-26285			0	3940				1	NO			NO	Scheduled Follow-up Submission		2013-08-23	MALE	Lung Adenocarcinoma Mixed Subtype	No	C34.3	8255-03-01	C34.3	YES		0.9	NO		NO			Central Lung	1	NO
TCGA-78-7150-01	7.9822	2	3	0.46	Solid predominant Adc	Solid predominant Adc		59	L-Lower		TCGA-78-7150-F16962	TCGA-78-7150	TCGA-78-7150-01A		164	-21891		666	0		139			0	NO			NO	Scheduled Follow-up Submission		2011-09-28	MALE	Lung Adenocarcinoma- Not Otherwise Specified (NOS)	No	C34.3	8140-03-01	C34.3	YES		0.8	NO		NO			Central Lung	0.9
TCGA-78-7152-01	6.0331	1	1.99	0.56	Acinar predominant Adc	Acinar predominant Adc		65	R-Upper		TCGA-78-7152-F46144	TCGA-78-7152	TCGA-78-7152-01A			-23782		1215	0	1202	1202			1	NO			NO	Scheduled Follow-up Submission	Progressive Disease	2013-08-04	MALE	Lung Adenocarcinoma Mixed Subtype	No	C34.1	8255-03-01	C34.1	YES		0.7	NO		NO			Peripheral Lung	0.9	NO	Distant Metastasis
TCGA-78-7153-01	6.6081	1	2.12	0.74	Papillary predominant Adc	Papillary predominant Adc		65	R-Upper		TCGA-78-7153-F46077	TCGA-78-7153				-23922			0	3635				0	NO			NO	Scheduled Follow-up Submission		2013-08-23	FEMALE	Lung Adenocarcinoma Mixed Subtype	No	C34.8	8255-03-01	C34.8	YES					NO			Peripheral Lung		NO
TCGA-78-7154-01	7.477	2	2.17	0.68	Papillary predominant Adc	Papillary predominant Adc		72	L-Upper		TCGA-78-7154-F16951	TCGA-78-7154				-26481		593	0					1	NO			NO	Scheduled Follow-up Submission		2011-09-28	MALE	Lung Adenocarcinoma- Not Otherwise Specified (NOS)	No	C34.1	8140-03-01	C34.1	YES					NO			Peripheral Lung
TCGA-78-7155-01	9.0954	2	2.53	0.81	Solid predominant Adc	Solid predominant Adc		68	L-Upper		TCGA-78-7155-F16958	TCGA-78-7155	TCGA-78-7155-01A			-24863		1171	0		209			0	NO			NO	Scheduled Follow-up Submission	Progressive Disease	2011-09-28	MALE	Lung Adenocarcinoma- Not Otherwise Specified (NOS)	No	C34.1	8140-03-01	C34.1	YES		0.7	NO		NO			Peripheral Lung	0.9
TCGA-78-7156-01	5.8777	1	1.98	0.8	Papillary predominant Adc	Papillary predominant Adc		62			TCGA-78-7156-F16982	TCGA-78-7156	TCGA-78-7156-01A			-22720		976	0					1	NO			NO	Scheduled Follow-up Submission		2011-09-29	MALE	Lung Adenocarcinoma Mixed Subtype	No	C34.9	8255-03-01	C34.9	YES		0.7	NO		NO			Peripheral Lung	1.1
TCGA-78-7158-01	5.9152	1	2.09	0.92	Micropapillary predom Adc	Micropapillary predom Adc		59	L-Lower		TCGA-78-7158-F16166	TCGA-78-7158	TCGA-78-7158-01A			-21742		179	0		132			1	NO			NO	Scheduled Follow-up Submission		2011-09-15	FEMALE	Lung Adenocarcinoma Mixed Subtype	No	C34.3	8255-03-01	C34.3	YES		0.9	NO		NO			Peripheral Lung	1.1
TCGA-78-7159-01	7.2012	2	2.13	0.71	Acinar predominant Adc	Acinar predominant Adc		60	L-Upper		TCGA-78-7159-F46103	TCGA-78-7159	TCGA-78-7159-01A			-22261			0	1974				1	NO			NO	Scheduled Follow-up Submission		2013-08-04	FEMALE	Lung Adenocarcinoma Mixed Subtype	No	C34.1	8255-03-01	C34.1	YES		1	NO		NO			Peripheral Lung	1.1	NO
TCGA-78-7160-01	7.1345	2	3.23	0.17	Micropapillary predom Adc	Micropapillary predom Adc		61	R-Lower		TCGA-78-7160-F46139	TCGA-78-7160				-22385		697	0	678				1	NO			NO	Scheduled Follow-up Submission		2013-08-04	MALE	Lung Adenocarcinoma Mixed Subtype	No	C34.3	8255-03-01	C34.3	YES					NO			Central Lung		NO
TCGA-78-7161-01	6.4844	1			Acinar predominant Adc	Acinar predominant Adc		69	L-Upper		TCGA-78-7161-F46153	TCGA-78-7161	TCGA-78-7161-01A			-25294		291	0	215	162			1	YES			NO	Scheduled Follow-up Submission	Progressive Disease	2013-08-23	FEMALE	Lung Adenocarcinoma Mixed Subtype	No	C34.1	8255-03-01	C34.1	YES		0.6	NO		NO			Peripheral Lung	1	NO	Locoregional Recurrence
TCGA-78-7162-01	6.3413	1			Adenocarcinoma, NOS	Adenocarcinoma, NOS		75	L-Upper		TCGA-78-7162-F17127	TCGA-78-7162	TCGA-78-7162-01A			-27593		3169	0		2740			0	NO			NO	Additional New Tumor Event		2011-10-03	MALE	Lung Adenocarcinoma Mixed Subtype	No	C34.1	8255-03-01	C34.1	YES		0.6	NO		NO			Peripheral Lung	0.7
TCGA-78-7163-01	4.8961	1	2.56	0.7	Invasive mucinous	Invasive mucinous		60	R-Lower		TCGA-78-7163-F46140	TCGA-78-7163	TCGA-78-7163-01A			-22002			0	7248				1	NO			NO	Scheduled Follow-up Submission		2013-08-04	MALE	Lung Adenocarcinoma- Not Otherwise Specified (NOS)	No	C34.3	8140-03-01	C34.3	YES		0.7	NO		NO			Peripheral Lung	1.2	NO
TCGA-78-7166-01	6.2417	1	2.04	0.63	Invasive mucinous	Invasive mucinous		84	L-Lower		TCGA-78-7166-F16954	TCGA-78-7166	TCGA-78-7166-01A			-30869		258	0					2	NO			NO	Scheduled Follow-up Submission		2011-09-28	MALE	Lung Adenocarcinoma- Not Otherwise Specified (NOS)	No	C34.3	8140-03-01	C34.3	YES		0.6	NO		NO			Central Lung	0.9
TCGA-78-7167-01	6.4904	1			Lepidic predominant Adc	Lepidic predominant Adc		77			TCGA-78-7167-F17172	TCGA-78-7167	TCGA-78-7167-01A			-28295		2681	0		726			1	NO			NO	Scheduled Follow-up Submission	Progressive Disease	2011-10-04	MALE	Lung Papillary Adenocarcinoma	No	C34.9	8260-03-01	C34.9	YES		0.6	NO		NO			Peripheral Lung	0.7
TCGA-78-7220-01	7.7323	2						53	L-Upper		TCGA-78-7220-F19298	TCGA-78-7220				-19480		807	0		531			0	NO			NO	Scheduled Follow-up Submission		2011-12-08	FEMALE	Lung Adenocarcinoma Mixed Subtype	No	C34.1	8255-03-01	C34.1	YES					NO			Peripheral Lung
TCGA-78-7535-01	6.3508	1	1.53	0.75	Solid predominant Adc	Solid predominant Adc		45	L-Upper		TCGA-78-7535-F20633	TCGA-78-7535	TCGA-78-7535-01A		809	-16571		949	0		809			0	NO			NO	Scheduled Follow-up Submission	Progressive Disease	2012-01-19	MALE	Lung Adenocarcinoma- Not Otherwise Specified (NOS)	No	C34.1	8140-03-01	C34.1	YES		1	NO		NO				1.2
TCGA-78-7536-01	8.5932	2	3.07	0.78	Solid predominant Adc	Solid predominant Adc		69	R-Upper		TCGA-78-7536-F20631	TCGA-78-7536	TCGA-78-7536-01A			-25558		244	0		231			0	NO			NO	Scheduled Follow-up Submission	Progressive Disease	2012-01-19	MALE	Lung Adenocarcinoma- Not Otherwise Specified (NOS)	No	C34.1	8140-03-01	C34.1	YES		0.7	NO		NO				1.1
TCGA-78-7537-01	5.9776	1	2.08	0.74	Papillary predominant Adc	Papillary predominant Adc		72	R-Upper		TCGA-78-7537-F20455	TCGA-78-7537				-26610		1622	0					1	NO			NO	Scheduled Follow-up Submission		2012-01-13	MALE	Lung Adenocarcinoma Mixed Subtype	No	C34.1	8255-03-01	C34.1	YES					NO
TCGA-78-7539-01	6.4609	1	2.1	0.69	Papillary predominant Adc	Papillary predominant Adc		75	R-Upper		TCGA-78-7539-F46143	TCGA-78-7539	TCGA-78-7539-01A		688	-27445			0	791	688			1	NO			NO	Scheduled Follow-up Submission		2013-08-04	FEMALE	Lung Adenocarcinoma Mixed Subtype	No	C34.1	8255-03-01	C34.1	YES		0.8	NO		NO				0.9	NO	Distant Metastasis
TCGA-78-7540-01	6.71	1	2.02	0.58	Invasive mucinous	Invasive mucinous		66	L-Lower		TCGA-78-7540-F46104	TCGA-78-7540	TCGA-78-7540-01A			-24440		1197	0	881				0	NO			NO	Scheduled Follow-up Submission		2013-08-02	FEMALE	Lung Bronchioloalveolar Carcinoma Mucinous	No	C34.3	8253-03-01	C34.3	YES		0.8	NO		NO				1.3	NO
TCGA-78-7542-01	7.8124	2	3.49	0.44	Solid predominant Adc	Solid predominant Adc		56	R-Upper		TCGA-78-7542-F20456	TCGA-78-7542				-20763		321	0					0	NO			NO	Scheduled Follow-up Submission		2012-01-13	MALE	Lung Adenocarcinoma- Not Otherwise Specified (NOS)	No	C34.1	8140-03-01	C34.1	YES					NO
TCGA-78-7633-01	6.9801	1	2.19	0.75	Papillary predominant Adc	Papillary predominant Adc		67	L-Upper		TCGA-78-7633-F46157	TCGA-78-7633	TCGA-78-7633-01A			-24713		1528	0	994	1450		57	0	NO			NO	Scheduled Follow-up Submission	Progressive Disease	2013-08-29	MALE	Lung Adenocarcinoma Mixed Subtype	No	C34.1	8255-03-01	C34.1	YES		0.9	NO		NO				1	NO	Locoregional Recurrence
TCGA-78-8640-01	7.6964	2						59	L-Upper		TCGA-78-8640-F70500	TCGA-78-8640	TCGA-78-8640-01A			-21832			0	7062				0	NO			NO	Scheduled Follow-up Submission		2015-03-25	MALE	Lung Adenocarcinoma- Not Otherwise Specified (NOS)	No	C34.1	8140-03-01	C34.1	YES		0.7	NO		NO			Peripheral Lung	0.8	NO
TCGA-78-8648-01	6.9261	1						58	R-Upper			TCGA-78-8648	TCGA-78-8648-01A			-21443		1209	0				69	2	NO			NO			2012-10-23	FEMALE	Lung Adenocarcinoma- Not Otherwise Specified (NOS)	No	C34.1	8140-03-01	C34.1	YES		0.8	NO		NO			Peripheral Lung	1.2
TCGA-78-8655-01	6.4425	1						77	L-Lower		TCGA-78-8655-F46154	TCGA-78-8655				-28379			0	2360			93	0	NO			NO	Scheduled Follow-up Submission		2013-08-28	FEMALE	Lung Adenocarcinoma Mixed Subtype	No	C34.3	8255-03-01	C34.3	YES					NO			Peripheral Lung		YES
TCGA-78-8660-01	7.6268	2						69	R-Lower			TCGA-78-8660	TCGA-78-8660-01A			-25422		321	0				87	1	NO			NO			2012-10-23	MALE	Lung Adenocarcinoma- Not Otherwise Specified (NOS)	No	C34.3	8140-03-01	C34.3	YES		0.8	NO		NO			Peripheral Lung	1.1
TCGA-78-8662-01	7.7221	2						53	R-Upper			TCGA-78-8662	TCGA-78-8662-01A			-19563		3361	0				76	0	NO			NO			2012-10-23	FEMALE	Lung Adenocarcinoma- Not Otherwise Specified (NOS)	No	C34.1	8140-03-01	C34.1	YES			NO		NO			Peripheral Lung
TCGA-80-5607-01	6.8872	1	2.02	0.49	Acinar predominant Adc	Acinar predominant Adc			L-Upper		TCGA-80-5607-F15867	TCGA-80-5607	TCGA-80-5607-01A											1							2011-08-15	FEMALE	Lung Adenocarcinoma- Not Otherwise Specified (NOS)	No	C34.1	8140-03-01	C34.1	YES		0.8	NO					Peripheral Lung	1.4
TCGA-80-5608-01	7.2754	2	3.11	0.48	Acinar predominant Adc	Acinar predominant Adc			R-Upper		TCGA-80-5608-F72033	TCGA-80-5608	TCGA-80-5608-01A							2832				1					Scheduled Follow-up Submission		2015-04-02	FEMALE	Lung Adenocarcinoma- Not Otherwise Specified (NOS)	No	C34.1	8140-03-01	C34.1	YES		0.7	NO					Peripheral Lung	1.2	NO
TCGA-80-5611-01	7.2272	2							L-Upper		TCGA-80-5611-F72034	TCGA-80-5611	TCGA-80-5611-01A							2595				0					Scheduled Follow-up Submission		2015-04-02	MALE	Lung Solid Pattern Predominant Adenocarcinoma	No	C34.1	8230-03-01	C34.1	YES		0.8	NO					Peripheral Lung	1.2	NO
TCGA-83-5908-01	8.2611	2						59	L-Upper		TCGA-83-5908-F12196	TCGA-83-5908	TCGA-83-5908-01A			-21760			0	824				1	NO			NO		Stable Disease	2011-05-25	FEMALE	Lung Adenocarcinoma- Not Otherwise Specified (NOS)	No	C34.1	8140-03-01	C34.1	YES		1	NO	90	NO				1.9
TCGA-86-6562-01	7.0356	2	3.43	0.45	Micropapillary predom Adc	Micropapillary predom Adc		52	R-Upper		TCGA-86-6562-F29765	TCGA-86-6562	TCGA-86-6562-01A			-19301		376	0	0	274								Scheduled Follow-up Submission	Progressive Disease	2012-03-28	MALE	Lung Adenocarcinoma- Not Otherwise Specified (NOS)	No	C34.1	8140-03-01	C34.1	YES		1.4	NO	0	NO			Central Lung	1.9
TCGA-86-6851-01	6.7439	1	3.34	0.32	Acinar predominant Adc	Acinar predominant Adc		73	L-Upper		TCGA-86-6851-F53594	TCGA-86-6851	TCGA-86-6851-01A			-26808			0	179				0					Scheduled Follow-up Submission	Complete Remission/Response	2013-12-12	FEMALE	Lung Adenocarcinoma Mixed Subtype	No	C34.1	8255-03-01	C34.1	YES		0.7	NO	100					1	YES
TCGA-86-7701-01	7.0008	2						66	R-Upper		TCGA-86-7701-F58406	TCGA-86-7701	TCGA-86-7701-01A			-24209			0	947	900			2					Scheduled Follow-up Submission	Progressive Disease	2014-04-09	MALE	Lung Adenocarcinoma- Not Otherwise Specified (NOS)	No	C34.1	8140-03-01	C34.1	YES		1.7	NO	80				Peripheral Lung	1.8	NO	Distant Metastasis
TCGA-86-7711-01	8.6678	2						70	R-Lower		TCGA-86-7711-F41203	TCGA-86-7711	TCGA-86-7711-01A			-25719		1046	0	27				2					Scheduled Follow-up Submission	Progressive Disease	2013-03-13	MALE	Lung Adenocarcinoma- Not Otherwise Specified (NOS)	No	C34.3	8140-03-01	C34.3	YES		1.5	NO	80	NO			Peripheral Lung	1.8	NO
TCGA-86-7713-01	7.6562	2	2.14	0.79	Micropapillary predom Adc	Micropapillary predom Adc		70	R-Middle		TCGA-86-7713-F63513	TCGA-86-7713	TCGA-86-7713-01A			-25791			0	1157				0					Scheduled Follow-up Submission	Complete Remission/Response	2014-08-12	MALE	Lung Adenocarcinoma- Not Otherwise Specified (NOS)	No	C34.2	8140-03-01	C34.2	YES		1.2	NO	100	NO			Peripheral Lung	3	NO
TCGA-86-7714-01	5.6188	1			Lepidic predominant Adc	Lepidic predominant Adc		61	R-Lower		TCGA-86-7714-F53595	TCGA-86-7714				-22619		625	0	0				0	NO				Scheduled Follow-up Submission	Progressive Disease	2013-12-12	FEMALE	Lung Adenocarcinoma Mixed Subtype	No	C34.3	8255-03-01	C34.3	YES				0	NO			Peripheral Lung		NO
TCGA-86-7953-01	7.6986	2						69	L-Upper		TCGA-86-7953-F66262	TCGA-86-7953	TCGA-86-7953-01A			-25315			0	997				1	NO				Scheduled Follow-up Submission	Complete Remission/Response	2014-10-07	FEMALE	Lung Adenocarcinoma- Not Otherwise Specified (NOS)	No	C34.1	8250-03-01	C34.1	YES		1.2	NO	90				Peripheral Lung	3	NO
TCGA-86-7954-01	7.248	2						68	R-Lower		TCGA-86-7954-F57948	TCGA-86-7954	TCGA-86-7954-01A			-25062			0	605				0	NO				Scheduled Follow-up Submission	Complete Remission/Response	2014-03-28	FEMALE	Lung Bronchioloalveolar Carcinoma Nonmucinous	No	C34.3	8250-03-01	C34.3	YES		1	NO	100	NO			Peripheral Lung	1.1	NO
TCGA-86-7955-01	7.7198	2						62	R-Lower		TCGA-86-7955-F63517	TCGA-86-7955	TCGA-86-7955-01A			-22772			0	1072	820			0	NO				Scheduled Follow-up Submission	Complete Remission/Response	2014-08-12	MALE	Lung Adenocarcinoma- Not Otherwise Specified (NOS)	No	C34.3	8140-03-01	C34.3	YES		1.5	NO	100	NO			Peripheral Lung	2.1	NO	Locoregional Recurrence
TCGA-86-8054-01	8.5296	2						61	R-Upper		TCGA-86-8054-F65792	TCGA-86-8054	TCGA-86-8054-01A			-22584			0	1148				2	NO			NO	Scheduled Follow-up Submission	Complete Remission/Response	2014-09-30	MALE	Lung Acinar Adenocarcinoma	No	C34.1	8550-03-01	C34.1	YES		1.1	NO	80	NO			Central Lung	1.7	NO
TCGA-86-8055-01	7.1749	2						79	L-Upper		TCGA-86-8055-F40636	TCGA-86-8055	TCGA-86-8055-01A			-29124		124	0	10				2	NO				Scheduled Follow-up Submission	Complete Remission/Response	2013-02-26	MALE	Lung Adenocarcinoma- Not Otherwise Specified (NOS)	No	C34.1	8140-03-01	C34.1	YES		1.3	NO	80	NO			Peripheral Lung	3.2	NO
TCGA-86-8056-01	6.8751	1						63	Other (please specify)	Right upper, lower	TCGA-86-8056-F57951	TCGA-86-8056	TCGA-86-8056-01A			-23369			0	139				0	NO			NO	Scheduled Follow-up Submission		2014-03-28	FEMALE	Lung Adenocarcinoma Mixed Subtype	No	C34.1	8255-03-01	C34.1	YES		1.1	NO	100	NO			Peripheral Lung	1.4	YES
TCGA-86-8073-01	6.9341	1						58	L-Upper		TCGA-86-8073-F66082	TCGA-86-8073	TCGA-86-8073-01A			-21214			0	740				0	NO			NO	Scheduled Follow-up Submission	Complete Remission/Response	2014-10-02	MALE	Lung Bronchioloalveolar Carcinoma Nonmucinous	No	C34.1	8250-03-01	C34.1	YES		1.5	NO	100	NO			Peripheral Lung	1.8	NO
TCGA-86-8074-01	6.6856	1						62	L-Lower		TCGA-86-8074-F41667	TCGA-86-8074	TCGA-86-8074-01A			-22862			0	24				2	NO			NO	Scheduled Follow-up Submission		2013-03-26	FEMALE	Lung Adenocarcinoma- Not Otherwise Specified (NOS)	No	C34.3	8260-03-01	C34.3	YES		1.3	NO	80	NO			Peripheral Lung	2.3	YES
TCGA-86-8075-01	7.311	2						66	L-Upper		TCGA-86-8075-F63521	TCGA-86-8075	TCGA-86-8075-01A			-24402		694	0	43				1	NO			NO	Scheduled Follow-up Submission	Complete Remission/Response	2014-08-12	FEMALE	Lung Adenocarcinoma- Not Otherwise Specified (NOS)	No	C34.1	8140-03-01	C34.1	YES		1.6	NO	90	NO			Peripheral Lung	1.8	NO
TCGA-86-8076-01	6.0124	1						42	R-Upper		TCGA-86-8076-F63522	TCGA-86-8076	TCGA-86-8076-01A			-15605			0	993				0	NO			NO	Scheduled Follow-up Submission	Complete Remission/Response	2014-08-12	MALE	Lung Papillary Adenocarcinoma	No	C34.1	8260-03-01	C34.1	YES		1.2	NO	100	NO			Peripheral Lung	1.7	NO
TCGA-86-8278-01	6.9647	1						63	L-Lower		TCGA-86-8278-F59732	TCGA-86-8278	TCGA-86-8278-01A			-23117			0	944				1					Scheduled Follow-up Submission	Stable Disease	2014-05-20	FEMALE	Lung Adenocarcinoma- Not Otherwise Specified (NOS)	No	C34.30	8480-03-01	C34.3	YES		1.2	NO	90	NO			Peripheral Lung	2	NO
TCGA-86-8279-01	6.389	1						46	R-Upper		TCGA-86-8279-F59731	TCGA-86-8279	TCGA-86-8279-01A			-17032			0	949				1					Scheduled Follow-up Submission	Complete Remission/Response	2014-05-20	MALE	Lung Adenocarcinoma- Not Otherwise Specified (NOS)	No	C34.1	8140-03-01	C34.1	YES		1.5	NO	90	NO			Peripheral Lung	1.8	NO
TCGA-86-8280-01	6.398	1						54	L-Lower		TCGA-86-8280-F66079	TCGA-86-8280	TCGA-86-8280-01A			-19977			0	701				0					Scheduled Follow-up Submission	Complete Remission/Response	2014-10-02	FEMALE	Lung Bronchioloalveolar Carcinoma Nonmucinous	No	C34.3	8252-03-01	C34.3	YES		1.4	NO	100	NO			Peripheral Lung	2.8	NO
TCGA-86-8281-01	6.3785	1						75	R-Lower		TCGA-86-8281-F57953	TCGA-86-8281	TCGA-86-8281-01A			-27409			0	0				0					Scheduled Follow-up Submission		2014-04-21	MALE	Lung Adenocarcinoma- Not Otherwise Specified (NOS)	No	C34.3	8140-03-01	C34.3	YES		0.6	NO	100	NO			Peripheral Lung	1.6	YES
TCGA-86-8358-01	8.8334	2						44	R-Upper		TCGA-86-8358-F58410	TCGA-86-8358	TCGA-86-8358-01A			-16409			0	653				0					Scheduled Follow-up Submission	Complete Remission/Response	2014-04-09	MALE	Lung Adenocarcinoma- Not Otherwise Specified (NOS)	No	C34.1	8140-03-01	C34.1	YES		1.4	NO	100	NO			Peripheral Lung	1.7	NO
TCGA-86-8359-01	7.1609	2						52	L-Lower		TCGA-86-8359-F43296	TCGA-86-8359	TCGA-86-8359-01A			-19088		444	0	26				4					Scheduled Follow-up Submission		2013-05-16	MALE	Lung Adenocarcinoma- Not Otherwise Specified (NOS)	No	C34.3	8140-03-01	C34.3	YES		2	NO	20				Peripheral Lung	2.5	NO
TCGA-86-8585-01	7.2272	2						57	L-Upper		TCGA-86-8585-F46400	TCGA-86-8585	TCGA-86-8585-01A			-20918			0	353					NO				Scheduled Follow-up Submission	Complete Remission/Response	2013-09-19	MALE	Lung Solid Pattern Predominant Adenocarcinoma	No	C34.1	8230-03-01	C34.1	YES		2	NO		NO			Peripheral Lung	2.2	YES
TCGA-86-8668-01	6.2942	1						61	L-Lower		TCGA-86-8668-F66084	TCGA-86-8668	TCGA-86-8668-01A			-22383			0	423				0					Scheduled Follow-up Submission	Complete Remission/Response	2014-10-02	FEMALE	Lung Bronchioloalveolar Carcinoma Mucinous	No	C34.3	8253-03-01	C34.3	YES		1.6	NO	100	NO			Peripheral Lung	2	NO
TCGA-86-8669-01	6.9951	1						64	R-Upper		TCGA-86-8669-F66085	TCGA-86-8669	TCGA-86-8669-01A			-23443			0	938	849			0					Scheduled Follow-up Submission	Complete Remission/Response	2014-10-15	MALE	Lung Adenocarcinoma- Not Otherwise Specified (NOS)	No	C34.1	8140-03-01	C34.1	YES		1.5	NO	100	NO			Peripheral Lung	2.2	NO	Distant Metastasis
TCGA-86-8671-01	6.5679	1						72	R-Upper		TCGA-86-8671-F66089	TCGA-86-8671	TCGA-86-8671-01A			-26448			0	839				0					Scheduled Follow-up Submission	Complete Remission/Response	2014-10-02	FEMALE	Lung Papillary Adenocarcinoma	No	C34.1	8260-03-01	C34.1	YES		0.8	NO	100				Peripheral Lung	0.9	NO
TCGA-86-8672-01	6.7431	1						59	R-Upper		TCGA-86-8672-F46401	TCGA-86-8672	TCGA-86-8672-01A			-21682		19	0	15									Scheduled Follow-up Submission		2013-08-07	MALE	Lung Adenocarcinoma- Not Otherwise Specified (NOS)	No	C34.1	8140-03-01	C34.1	YES		1.7	NO		NO			Central Lung	2.2	NO
TCGA-86-8673-01	6.8444	1						61	L-Upper		TCGA-86-8673-F59092	TCGA-86-8673	TCGA-86-8673-01A	639		-22571			0	862	636								Scheduled Follow-up Submission	Complete Remission/Response	2014-04-30	MALE	Lung Bronchioloalveolar Carcinoma Nonmucinous	No	C34.1	8252-03-01	C34.1	YES		1.8	NO						2.9	NO	Locoregional Recurrence
TCGA-86-8674-01	6.1511	1						50	R-Middle		TCGA-86-8674-F59096	TCGA-86-8674	TCGA-86-8674-01A			-18479			0	806									Scheduled Follow-up Submission	Complete Remission/Response	2014-04-30	MALE	Lung Papillary Adenocarcinoma	No	C34.2	8260-03-01	C34.2	YES		1.5	NO					Peripheral Lung	2.5	NO
TCGA-86-A456-01	5.552	1						78	L-Upper		TCGA-86-A456-F67789	TCGA-86-A456	TCGA-86-A456-01A			-28533	90		0	896									Scheduled Follow-up Submission	Complete Remission/Response	2014-11-11	FEMALE	Lung Papillary Adenocarcinoma	No	C34.1	8260-03-01	C34.1	YES	580		NO	80				Peripheral Lung		NO
TCGA-86-A4D0-01	8.4228	2						48	R-Upper		TCGA-86-A4D0-F52852	TCGA-86-A4D0	TCGA-86-A4D0-01A			-17607	133	116	0	30				1	NO			NO	Scheduled Follow-up Submission	Complete Remission/Response	2013-12-06	MALE	Lung Adenocarcinoma- Not Otherwise Specified (NOS)	No	C34.1	8140-03-01	C34.1	YES	920		NO	90	NO					NO
TCGA-86-A4JF-01	6.9913	1						56	R-Upper		TCGA-86-A4JF-F70857	TCGA-86-A4JF	TCGA-86-A4JF-01A			-20491	140	737	0	0				4	NO			NO	Scheduled Follow-up Submission	Progressive Disease	2015-03-10	MALE	Lung Adenocarcinoma- Not Otherwise Specified (NOS)	No	C34.1	8140-03-01	C34.1	YES	940		NO	20	NO			Central Lung		NO
TCGA-86-A4P7-01	6.2283	1						63	L-Lower		TCGA-86-A4P7-F66092	TCGA-86-A4P7	TCGA-86-A4P7-01A			-23330	220		0	415				0	NO			NO	Scheduled Follow-up Submission	Complete Remission/Response	2014-10-02	FEMALE	Lung Adenocarcinoma- Not Otherwise Specified (NOS)	No	C34.3	8140-03-01	C34.3	YES	350		NO	100	NO			Peripheral Lung		NO
TCGA-86-A4P8-01	5.7322	1						59	R-Lower		TCGA-86-A4P8-F65331	TCGA-86-A4P8	TCGA-86-A4P8-01A			-21738	98		0	805			85	0	YES		FISH	YES	Scheduled Follow-up Submission	Complete Remission/Response	2014-09-22	FEMALE	Lung Adenocarcinoma- Not Otherwise Specified (NOS)	No	C34.3	8140-03-01	C34.3	YES	360		NO		NO					NO
TCGA-91-6828-01	6.7517	1			Acinar predominant Adc	Acinar predominant Adc		70	L-Lower		TCGA-91-6828-F21014	TCGA-91-6828	TCGA-91-6828-01A			-25870			0	323			71	2					Scheduled Follow-up Submission		2012-05-08	MALE	Lung Adenocarcinoma- Not Otherwise Specified (NOS)	No	C34.3	8140-03-01	C34.3	YES		0.8	NO		NO				1.5
TCGA-91-6829-01	7.7687	2	2.78	0.48	Acinar predominant Adc	Acinar predominant Adc		78	R-Lower		TCGA-91-6829-F32591	TCGA-91-6829	TCGA-91-6829-01A			-28841		1258	0					3					Scheduled Follow-up Submission	Progressive Disease	2012-06-04	MALE	Lung Bronchioloalveolar Carcinoma Nonmucinous	No	C34.3	8252-03-01	C34.3	YES		0.5	NO	0	NO				0.9	NO
TCGA-91-6830-01	6.6267	1						65	L-Upper		TCGA-91-6830-F32595	TCGA-91-6830			18	-23922			0	60	18								Scheduled Follow-up Submission		2012-06-04	FEMALE	Lung Adenocarcinoma- Not Otherwise Specified (NOS)	No	C34.1	8140-03-01	C34.1	YES					NO					YES	Distant Metastasis
TCGA-91-6831-01	8.2669	2						66	R-Middle		TCGA-91-6831-F32636	TCGA-91-6831	TCGA-91-6831-01A			-24436			0	310									Scheduled Follow-up Submission	Complete Remission/Response	2012-06-05	MALE	Lung Adenocarcinoma- Not Otherwise Specified (NOS)	No	C34.2	8140-03-01	C34.2	YES		0.6	NO		NO				0.6	YES
TCGA-91-6835-01	7.0112	2			Solid predominant Adc	Solid predominant Adc		81	R-Lower		TCGA-91-6835-F32643	TCGA-91-6835	TCGA-91-6835-01A			-29887			0	79			78		NO				Scheduled Follow-up Submission	Complete Remission/Response	2012-06-05	FEMALE	Lung Adenocarcinoma- Not Otherwise Specified (NOS)	No	C34.3	8140-03-01	C34.3	YES		0.5	NO		NO				1.1	YES
TCGA-91-6836-01	8.5377	2						52	R-Upper		TCGA-91-6836-F32646	TCGA-91-6836	TCGA-91-6836-01A			-19216			0	417			97		NO				Scheduled Follow-up Submission	Complete Remission/Response	2012-06-05	FEMALE	Lung Adenocarcinoma- Not Otherwise Specified (NOS)	No	C34.1	8140-03-01	C34.1	YES		0.6	NO		NO				0.9	NO
TCGA-91-6840-01	6.4364	1	2.83	0.62	Solid predominant Adc	Solid predominant Adc		59	R-Upper		TCGA-91-6840-F21664	TCGA-91-6840	TCGA-91-6840-01A			-21854			0	372									Scheduled Follow-up Submission		2012-05-08	FEMALE	Lung Adenocarcinoma- Not Otherwise Specified (NOS)	No	C34.1	8140-03-01	C34.1	YES		0.5	NO		NO				0.7
TCGA-91-6847-01	7.8589	2	3.86	0.86	Acinar predominant Adc	Acinar predominant Adc		62	R-Lower		TCGA-91-6847-F32637	TCGA-91-6847	TCGA-91-6847-01A			-22862			0	842	772								Scheduled Follow-up Submission	Stable Disease	2012-06-05	FEMALE	Lung Adenocarcinoma- Not Otherwise Specified (NOS)	No	C34.3	8140-03-01	C34.3	YES		0.4	NO		NO				1.1	YES	Distant Metastasis
TCGA-91-6848-01	8.599	2						59	L-Upper		TCGA-91-6848-F32641	TCGA-91-6848	TCGA-91-6848-01A			-21829			0	224									Scheduled Follow-up Submission	Complete Remission/Response	2012-06-05	MALE	Lung Adenocarcinoma- Not Otherwise Specified (NOS)	No	C34.1	8140-03-01	C34.1	YES		0.8	NO		YES	NO			1.1	YES
TCGA-91-6849-01	5.0867	1	1.93	0.6	Acinar predominant Adc	Acinar predominant Adc		75	L-Upper		TCGA-91-6849-F32642	TCGA-91-6849	TCGA-91-6849-01A			-27676			0	35			66		YES				Scheduled Follow-up Submission		2012-06-05	FEMALE	Lung Adenocarcinoma- Not Otherwise Specified (NOS)	No	C34.1	8140-03-01	C34.1	YES		0.5	NO	90	NO				1.5	YES
TCGA-91-7771-01	6.5035	1			Solid predominant Adc	Solid predominant Adc		62	R-Upper		TCGA-91-7771-F37916	TCGA-91-7771	TCGA-91-7771-01A			-22926			0	492					NO				Scheduled Follow-up Submission	Complete Remission/Response	2012-12-06	MALE	Lung Adenocarcinoma- Not Otherwise Specified (NOS)	No	C34.1	8140-03-01	C34.1	YES		0.9	NO		NO				3	NO
TCGA-91-8496-01	5.7687	1						63	L-Lower		TCGA-91-8496-F45467	TCGA-91-8496	TCGA-91-8496-01A			-23358			0	505				0	NO			NO	Scheduled Follow-up Submission	Complete Remission/Response	2013-07-15	FEMALE	Lung Bronchioloalveolar Carcinoma Nonmucinous	No	C34.3	8252-03-01	C34.3	YES		0.4	NO		NO				2	NO
TCGA-91-8497-01	6.5764	1						75	R-Upper		TCGA-91-8497-F58334	TCGA-91-8497	TCGA-91-8497-01A			-27632		434	0	174									Scheduled Follow-up Submission	Complete Remission/Response	2014-04-07	FEMALE	Lung Adenocarcinoma- Not Otherwise Specified (NOS)	No	C34.1	8140-03-01	C34.1	YES		0.7	NO		NO				1.8	NO
TCGA-91-8499-01	8.0381	2						76	L-Lower		TCGA-91-8499-F37976	TCGA-91-8499	TCGA-91-8499-01A			-27853			0	36					YES				Scheduled Follow-up Submission		2012-12-07	FEMALE	Lung Adenocarcinoma- Not Otherwise Specified (NOS)	No	C34.3	8140-03-01	C34.3	YES		0.6	NO		NO				1.2	YES
TCGA-91-A4BC-01	7.4968	2						59	R-Upper		TCGA-91-A4BC-F45192	TCGA-91-A4BC	TCGA-91-A4BC-01A			-21565	225		0	44			44		NO				Scheduled Follow-up Submission		2013-07-10	MALE	Lung Adenocarcinoma- Not Otherwise Specified (NOS)	No	C34.1	8140-03-01	C34.1	YES	280		NO		NO					YES
TCGA-91-A4BD-01	5.7213	1						78	L-Lower		TCGA-91-A4BD-F58335	TCGA-91-A4BD	TCGA-91-A4BD-01A			-28544	162		0	603			94	1	NO				Scheduled Follow-up Submission	Complete Remission/Response	2014-04-07	MALE	Lung Adenocarcinoma- Not Otherwise Specified (NOS)	No	C34.3	8140-03-01	C34.3	YES	220		NO		NO					NO
TCGA-93-7347-01	6.6152	1			Acinar predominant Adc	Acinar predominant Adc		76	R-Upper		TCGA-93-7347-F43155	TCGA-93-7347	TCGA-93-7347-01A			-27949			0	683			70		NO			NO	Scheduled Follow-up Submission		2013-05-14	FEMALE	Lung Adenocarcinoma Mixed Subtype	No	C34.1	8255-03-01	C34.1	YES		1	NO		NO			Central Lung	1	NO
TCGA-93-7348-01	5.8789	1	1.76	0.35	Acinar predominant Adc	Acinar predominant Adc		75	R-Upper		TCGA-93-7348-F43154	TCGA-93-7348	TCGA-93-7348-01A			-27456			0	531				0	NO			NO	Scheduled Follow-up Submission		2013-05-14	FEMALE	Lung Adenocarcinoma- Not Otherwise Specified (NOS)	No	C34.1	8140-03-01	C34.1	YES		1.2	NO	100	NO			Central Lung	1.5	NO
TCGA-93-8067-01	7.1858	2						77	L-Lower		TCGA-93-8067-F32193	TCGA-93-8067				-28453			0	186			47	2	NO			NO	Scheduled Follow-up Submission	Complete Remission/Response	2012-05-18	MALE	Lung Adenocarcinoma- Not Otherwise Specified (NOS)	No	C34.3	8140-03-01	C34.3	YES				80	NO			Peripheral Lung		NO
TCGA-93-A4JN-01	7.5462	2						71	L-Upper		TCGA-93-A4JN-F56980	TCGA-93-A4JN	TCGA-93-A4JN-01A			-26273	209		0	718				1	YES		FISH	YES	Scheduled Follow-up Submission	Stable Disease	2014-02-27	MALE	Lung Acinar Adenocarcinoma	No	C34.1	8550-03-01	C34.1	YES	330		NO	90	YES	NO				NO
TCGA-93-A4JO-01	6.7542	1						70	R-Lower			TCGA-93-A4JO	TCGA-93-A4JO-01A			-25898	230	33	0				81	1	NO			NO			2014-02-27	MALE	Lung Adenocarcinoma Mixed Subtype	No	C34.3	8255-03-01	C34.3	YES	390		NO	90	NO
TCGA-93-A4JP-01	6.705	1						64	R-Lower		TCGA-93-A4JP-F56970	TCGA-93-A4JP	TCGA-93-A4JP-01A			-23620	72		0	578	497			1	YES	L861Q		NO	Scheduled Follow-up Submission	Progressive Disease	2014-02-28	MALE	Lung Papillary Adenocarcinoma	No	C34.3	8260-03-01	C34.3	YES	450		NO		NO					NO	Distant Metastasis
TCGA-93-A4JQ-01	6.7705	1						49	R-Upper		TCGA-93-A4JQ-F57022	TCGA-93-A4JQ	TCGA-93-A4JQ-01A			-17951	57		0	526			83	0	NO			NO	Scheduled Follow-up Submission	Complete Remission/Response	2014-02-28	MALE	Lung Acinar Adenocarcinoma	No	C34.1	8550-03-01	C34.1	YES	290		NO		NO					NO
TCGA-95-7039-01	7.1723	2	5.71	0.42	Micropapillary predom Adc	Micropapillary predom Adc		54	R-Upper		TCGA-95-7039-F67192	TCGA-95-7039	TCGA-95-7039-01A			-19981			0	1272	1258			1					Additional New Tumor Event	Progressive Disease	2014-10-31	FEMALE	Lung Adenocarcinoma- Not Otherwise Specified (NOS)	No	C34.1	8140-03-01	C34.1	YES		0.8	NO						0.8	NO	Locoregional Recurrence
TCGA-95-7043-01	7.0927	2	3.72	0.77	Adenocarcinoma, NOS	Adenocarcinoma, NOS		63	R-Upper		TCGA-95-7043-F67188	TCGA-95-7043	TCGA-95-7043-01A			-23165		503	0	2									Scheduled Follow-up Submission	Progressive Disease	2014-10-31	FEMALE	Lung Adenocarcinoma Mixed Subtype	No	C34.1	8255-03-01	C34.1	YES		0.6	NO						0.6	NO
TCGA-95-7562-01	7.1691	2						71	R-Lower		TCGA-95-7562-F32832	TCGA-95-7562				-26000		87	0				57	1					Scheduled Follow-up Submission		2012-06-13	MALE	Lung Adenocarcinoma- Not Otherwise Specified (NOS)	No	C34.3	8140-03-01	C34.3	YES										NO
TCGA-95-7567-01	7.7567	2	2.66	0.53	Adenocarcinoma, NOS	Adenocarcinoma, NOS		61	R-Upper		TCGA-95-7567-F40935	TCGA-95-7567	TCGA-95-7567-01A			-22437			0	568				0					Scheduled Follow-up Submission	Complete Remission/Response	2013-03-06	MALE	Lung Adenocarcinoma Mixed Subtype	No	C34.1	8255-03-01	C34.1	YES		0.7	NO	100					1	NO
TCGA-95-7944-01	8.2772	2						71	L-Lower		TCGA-95-7944-F40938	TCGA-95-7944	TCGA-95-7944-01A			-26003			0	377			60						Scheduled Follow-up Submission	Complete Remission/Response	2013-03-07	MALE	Lung Adenocarcinoma- Not Otherwise Specified (NOS)	No	C34.3	8140-03-01	C34.3	YES		0.7	NO						1.3	NO
TCGA-95-7947-01	7.5286	2			0	Acinar predominant Adc		67	L-Upper		TCGA-95-7947-F40940	TCGA-95-7947	TCGA-95-7947-01A			-24752			0	477									Scheduled Follow-up Submission	Complete Remission/Response	2013-03-07	MALE	Lung Adenocarcinoma Mixed Subtype	No	C34.1	8255-03-01	C34.1	YES		0.6	NO						1.2	NO
TCGA-95-7948-01	6.805	1			0	Micropapillary predom Adc		42	R-Lower		TCGA-95-7948-F40945	TCGA-95-7948	TCGA-95-7948-01A			-15363			0	476			87						Scheduled Follow-up Submission	Complete Remission/Response	2013-03-07	FEMALE	Lung Adenocarcinoma Mixed Subtype	No	C34.3	8255-03-01	C34.3	YES		0.7	NO						1.3	NO
TCGA-95-8039-01	6.6992	1						72	R-Upper		TCGA-95-8039-F61691	TCGA-95-8039	TCGA-95-8039-01A			-26317			0	830	228		98	0					Scheduled Follow-up Submission	Complete Remission/Response	2014-07-03	MALE	Lung Acinar Adenocarcinoma	No	C34.1	8550-03-01	C34.1	YES		0.5	NO						0.9	NO	Locoregional Recurrence
TCGA-95-8494-01	7.5565	2						67	R-Middle		TCGA-95-8494-F58476	TCGA-95-8494				-24773			0	84					NO			NO	Scheduled Follow-up Submission		2014-04-10	MALE	Lung Adenocarcinoma- Not Otherwise Specified (NOS)	No	C34.2	8140-03-01	C34.2	YES					NO					YES
TCGA-95-A4VK-01	7.1626	2						74	R-Upper		TCGA-95-A4VK-F58477	TCGA-95-A4VK	TCGA-95-A4VK-01A			-27040	155		0	651	496		81	1	YES			NO	Scheduled Follow-up Submission	Stable Disease	2014-04-10	FEMALE	Lung Adenocarcinoma Mixed Subtype	No	C34.1	8255-03-01	C34.1	YES	140		NO		NO					NO	Distant Metastasis
TCGA-95-A4VN-01	7.8557	2						62	R-Lower		TCGA-95-A4VN-F58501	TCGA-95-A4VN	TCGA-95-A4VN-01A			-22927	23		0	553			50	1	YES			NO	Scheduled Follow-up Submission	Stable Disease	2014-04-11	FEMALE	Lung Solid Pattern Predominant Adenocarcinoma	No	C34.3	8140-03-01	C34.3	YES	150		NO		NO					NO
TCGA-95-A4VP-01	7.6273	2						66	L-Lower		TCGA-95-A4VP-F58502	TCGA-95-A4VP	TCGA-95-A4VP-01A			-24130	68		0	605	216			1	NO			NO	Scheduled Follow-up Submission	Stable Disease	2014-04-11	FEMALE	Lung Acinar Adenocarcinoma	No	C34.3	8550-03-01	C34.3	YES	640		NO		NO					NO	Distant Metastasis
TCGA-97-7546-01	6.7863	1	1.8	0.57	Lepidic predominant Adc	Lepidic predominant Adc		76	L-Upper		TCGA-97-7546-F31995	TCGA-97-7546	TCGA-97-7546-01A			-27913			0	1285	1255		60						Additional New Tumor Event		2012-05-15	FEMALE	Lung Acinar Adenocarcinoma	No	C34.1	8550-03-01	C34.1	YES		0.6	NO						1.2	NO	New Primary Tumor
TCGA-97-7547-01	6.3677	1						67	R-Upper		TCGA-97-7547-F37177	TCGA-97-7547	TCGA-97-7547-01A	1894		-24737			0	1965	1147		94						Scheduled Follow-up Submission	Progressive Disease	2012-11-29	FEMALE	Lung Papillary Adenocarcinoma	No	C34.1	8260-03-01	C34.1	YES		0.2	NO						0.7	NO	Locoregional Recurrence
TCGA-97-7552-01	6.3456	1	1.95	0.18	Invasive mucinous	Invasive mucinous		70	L-Lower		TCGA-97-7552-F37174	TCGA-97-7552				-25578			0	1932	798								Scheduled Follow-up Submission	Complete Remission/Response	2012-11-29	MALE	Lung Bronchioloalveolar Carcinoma Mucinous	No	C34.3	8253-03-01	C34.3	YES										NO	New Primary Tumor
TCGA-97-7553-01	6.8109	1	1.47	0.3	Acinar predominant Adc	Acinar predominant Adc		58	L-Lower		TCGA-97-7553-F31865	TCGA-97-7553	TCGA-97-7553-01A			-21518			0	1870			64						Scheduled Follow-up Submission		2012-05-14	FEMALE	Lung Bronchioloalveolar Carcinoma Nonmucinous	No	C34.3	8252-03-01	C34.3	YES		1	NO					Central Lung	1.5	NO
TCGA-97-7554-01	6.7458	1	2.28	0.49	Acinar predominant Adc	Acinar predominant Adc		83	L-Lower		TCGA-97-7554-F20552	TCGA-97-7554				-30327			0	775			53	1					Scheduled Follow-up Submission		2012-01-17	FEMALE	Lung Papillary Adenocarcinoma	No	C34.3	8260-03-01	C34.3	YES					YES	YES	G12V
TCGA-97-7937-01	6.6978	1			Acinar predominant Adc	Acinar predominant Adc		65	L-Upper		TCGA-97-7937-F33767	TCGA-97-7937	TCGA-97-7937-01A			-23919			0	564			89	0	YES		FISH	YES	Scheduled Follow-up Submission		2012-09-12	MALE	Lung Micropapillary Adenocarcinoma	No	C34.1	8507-03-01	C34.1	YES		1.1	NO		YES	NO			1.1	NO
TCGA-97-7938-01	6.3404	1			Lepidic predominant Adc	Lepidic predominant Adc		76	R-Upper		TCGA-97-7938-F57460	TCGA-97-7938	TCGA-97-7938-01A			-27980		18	0				53		YES			NO	Scheduled Follow-up Submission	Complete Remission/Response	2014-03-11	FEMALE	Lung Bronchioloalveolar Carcinoma Nonmucinous	No	C34.1	8252-03-01	C34.1	YES		0.8	NO		YES	YES	G12C		1.2	NO
TCGA-97-7941-01	6.2181	1			Acinar predominant Adc	Acinar predominant Adc		72	L-Upper		TCGA-97-7941-F33765	TCGA-97-7941	TCGA-97-7941-01A			-26298			0	484			57	0	YES			NO	Scheduled Follow-up Submission		2012-08-13	FEMALE	Lung Acinar Adenocarcinoma	No	C34.1	8550-03-01	C34.1	YES		1	NO		YES	YES	G12A		1.3	NO
TCGA-97-8171-01	5.8356	1						81	Other (please specify)	RUL and RML	TCGA-97-8171-F44232	TCGA-97-8171	TCGA-97-8171-01A		441	-29627			0	568	441		110	1	YES	Exon 19 Deletion		NO	Scheduled Follow-up Submission	Progressive Disease	2013-06-19	MALE	Lung Papillary Adenocarcinoma	No	C34.8	8260-03-01	C34.8	YES		0.8	NO		YES	NO			1.9	NO	Distant Metastasis
TCGA-97-8172-01	6.3501	1						75	R-Upper		TCGA-97-8172-F44230	TCGA-97-8172	TCGA-97-8172-01A			-27416			0	545			64.98	1	YES			NO	Scheduled Follow-up Submission	Complete Remission/Response	2013-06-19	FEMALE	Lung Acinar Adenocarcinoma	No	C34.1	8550-03-01	C34.1	YES		1.2	NO		YES	YES	G12V		1.7	NO
TCGA-97-8174-01	6.4144	1						67	R-Upper			TCGA-97-8174	TCGA-97-8174-01A			-24725		164	0				90	0	YES		FISH	YES			2012-06-13	MALE	Lung Papillary Adenocarcinoma	No	C34.1	8260-03-01	C34.1	YES		1.5	NO		YES	NO			1.5
TCGA-97-8175-01	7.0169	2						55	L-Upper		TCGA-97-8175-F44234	TCGA-97-8175	TCGA-97-8175-01A	294		-20206			0	551	294				YES		FISH	YES	Scheduled Follow-up Submission	Complete Remission/Response	2013-06-19	FEMALE	Lung Solid Pattern Predominant Adenocarcinoma	No	C34.1	8230-03-01	C34.1	YES		1	NO		YES	NO		Peripheral Lung	2	NO	Locoregional Recurrence
TCGA-97-8176-01	7.7827	2						63	R-Lower		TCGA-97-8176-F49542	TCGA-97-8176				-23170		468	0	252			61	0	YES			NO	Scheduled Follow-up Submission	Progressive Disease	2013-10-11	MALE	Lung Acinar Adenocarcinoma	No	C34.3	8550-03-01	C34.3	YES					YES	YES	G12S			NO
TCGA-97-8177-01	6.1629	1						59	L-Lower		TCGA-97-8177-F44243	TCGA-97-8177	TCGA-97-8177-01A			-21648			0	499			97	0	YES	L858R		NO	Scheduled Follow-up Submission	Complete Remission/Response	2013-06-19	FEMALE	Lung Adenocarcinoma Mixed Subtype	No	C34.3	8255-03-01	C34.3	YES		1.7	NO		YES	NO			2.4	NO
TCGA-97-8179-01	7.6382	2						72	R-Upper		TCGA-97-8179-F44247	TCGA-97-8179	TCGA-97-8179-01A			-26305			0	435			73	0	YES		FISH	YES	Scheduled Follow-up Submission	Complete Remission/Response	2013-06-19	MALE	Lung Acinar Adenocarcinoma	No	C34.1	8550-03-01	C34.1	YES		0.6	NO		YES	NO			0.8	NO
TCGA-97-8547-01	7.1362	2						78	R-Lower		TCGA-97-8547-F49559	TCGA-97-8547				-28801			0	657			87		YES	Exon 19 Deletion		NO	Scheduled Follow-up Submission	Complete Remission/Response	2013-10-03	FEMALE	Lung Adenocarcinoma Mixed Subtype	No	C34.3	8550-03-01	C34.3	YES					YES	NO				NO
TCGA-97-8552-01	6.0594	1						55	L-Lower		TCGA-97-8552-F49557	TCGA-97-8552	TCGA-97-8552-01A			-20331			0	626			75	0	YES	Exon 19 Deletion		NO	Scheduled Follow-up Submission	Complete Remission/Response	2013-10-03	FEMALE	Lung Bronchioloalveolar Carcinoma Nonmucinous	No	C34.3	8252-03-01	C34.3	YES		1.1	NO		YES	NO			1.6	NO
TCGA-97-A4LX-01	6.6804	1						81	Other (please specify)	Lingula	TCGA-97-A4LX-F57384	TCGA-97-A4LX	TCGA-97-A4LX-01A			-29915	127		0	614			61	0	NO			NO	Scheduled Follow-up Submission	Complete Remission/Response	2014-03-10	MALE	Lung Adenocarcinoma Mixed Subtype	No	C34.1	8255-03-01	C34.1	YES	50		NO		YES	YES	G12A			NO
TCGA-97-A4M0-01	5.5428	1						60	R-Upper		TCGA-97-A4M0-F57385	TCGA-97-A4M0	TCGA-97-A4M0-01A			-22206	136		0	652				0	NO			NO	Scheduled Follow-up Submission	Complete Remission/Response	2014-03-10	FEMALE	Lung Adenocarcinoma Mixed Subtype	No	C34.1	8255-03-01	C34.1	YES	150		NO		YES	YES	G12C			NO
TCGA-97-A4M1-01	5.1294	1						52	R-Upper		TCGA-97-A4M1-F57386	TCGA-97-A4M1				-19272			0	601			111	0	NO			NO	Scheduled Follow-up Submission	Complete Remission/Response	2014-03-10	FEMALE	Lung Adenocarcinoma Mixed Subtype	No	C34.1	8255-03-01	C34.1	YES					NO					NO
TCGA-97-A4M2-01	5.9958	1						66	R-Middle		TCGA-97-A4M2-F57453	TCGA-97-A4M2	TCGA-97-A4M2-01A			-24313	93		0	624			91	1	NO			NO	Scheduled Follow-up Submission	Complete Remission/Response	2014-03-12	MALE	Lung Adenocarcinoma Mixed Subtype	No	C34.2	8255-03-01	C34.2	YES	180		NO		YES	NO				NO
TCGA-97-A4M3-01	6.3841	1						69	R-Upper		TCGA-97-A4M3-F57436	TCGA-97-A4M3				-25384			0	540	54		106	1	NO			NO	Scheduled Follow-up Submission	Complete Remission/Response	2014-03-11	FEMALE	Lung Adenocarcinoma Mixed Subtype	No	C34.1	8255-03-01	C34.1	YES					YES	NO				NO	New Primary Tumor
TCGA-97-A4M5-01	6.7064	1						83	R-Upper		TCGA-97-A4M5-F57443	TCGA-97-A4M5	TCGA-97-A4M5-01A			-30665	104		0	634			51		NO			NO	Scheduled Follow-up Submission	Complete Remission/Response	2014-03-12	MALE	Lung Adenocarcinoma Mixed Subtype	No	C34.1	8255-03-01	C34.1	YES	200		NO		YES	YES	G12C			NO
TCGA-97-A4M6-01	6.2615	1						45	R-Lower		TCGA-97-A4M6-F57434	TCGA-97-A4M6	TCGA-97-A4M6-01A			-16764	115		0	568			92	0	YES	Exon 19 Deletion		NO	Scheduled Follow-up Submission	Complete Remission/Response	2014-03-11	FEMALE	Lung Adenocarcinoma Mixed Subtype	No	C34.3	8255-03-01	C34.3	YES	180		NO		YES	NO				NO
TCGA-97-A4M7-01	6.2419	1						74	R-Middle		TCGA-97-A4M7-F57383	TCGA-97-A4M7	TCGA-97-A4M7-01A			-27062	132		0	629			99	0	YES	L858R		NO	Scheduled Follow-up Submission	Complete Remission/Response	2014-03-10	MALE	Lung Adenocarcinoma Mixed Subtype	No	C34.2	8255-03-01	C34.2	YES	160		NO		YES	NO				NO
TCGA-99-7458-01	6.7071	1	1.79	0.36	Micropapillary predom Adc	Micropapillary predom Adc		74	R-Lower		TCGA-99-7458-F40777	TCGA-99-7458	TCGA-99-7458-01A			-27359			0	747				1	YES		RT-PCR	YES	Scheduled Follow-up Submission	Stable Disease	2013-04-17	FEMALE	Lung Bronchioloalveolar Carcinoma Nonmucinous	No	C34.3	8252-03-01	C34.3	YES		0.7	NO	90	YES	YES	G12A		1.2	NO
TCGA-99-8025-01	7.481	2						72	R-Upper		TCGA-99-8025-F57698	TCGA-99-8025	TCGA-99-8025-01A			-26634			0	1060			87	1	YES			YES	Scheduled Follow-up Submission	Complete Remission/Response	2014-05-23	FEMALE	Lung Adenocarcinoma- Not Otherwise Specified (NOS)	No	C34.1	8140-03-01	C34.1	YES		0.8	NO		YES	NO		Central Lung	1.2	NO
TCGA-99-8028-01	6.3921	1						50	L-Upper		TCGA-99-8028-F57699	TCGA-99-8028	TCGA-99-8028-01A			-18542			0	1118			71	0	YES		RT-PCR	YES	Scheduled Follow-up Submission	Complete Remission/Response	2014-04-17	FEMALE	Lung Adenocarcinoma- Not Otherwise Specified (NOS)	No	C34.1	8140-03-01	C34.1	YES		0.6	NO		YES	YES	G12C		1.3	NO
TCGA-99-8032-01	7.2407	2						61	R-Upper			TCGA-99-8032	TCGA-99-8032-01A			-22635			0	44			54	0	YES			NO			2012-06-15	MALE	Lung Adenocarcinoma- Not Otherwise Specified (NOS)	No	C34.1	8140-03-01	C34.1	YES		0.7	NO		YES	YES	G12C		1.3
TCGA-99-8033-01	7.7755	2						74	R-Upper		TCGA-99-8033-F58623	TCGA-99-8033	TCGA-99-8033-01A			-27342		656	0	170				2	YES			NO	Scheduled Follow-up Submission		2015-03-30	FEMALE	Lung Adenocarcinoma- Not Otherwise Specified (NOS)	No	C34.1	8140-03-01	C34.1	YES		0.6	NO		YES	NO		Peripheral Lung	0.6	NO
TCGA-99-AA5R-01	5.8831	1						70	L-Lower		TCGA-99-AA5R-F69298	TCGA-99-AA5R	TCGA-99-AA5R-01A			-25778	323		0	658			47	1	YES		IHC	YES	Scheduled Follow-up Submission		2014-12-31	FEMALE	Lung Adenocarcinoma- Not Otherwise Specified (NOS)	No	C34.3	8140-03-01	C34.3	YES	90		NO		YES	YES	G12C			NO
TCGA-J2-8192-01	6.2283	1						65	L-Upper		TCGA-J2-8192-F55390	TCGA-J2-8192	TCGA-J2-8192-01A			-23892			0	739	482		112		YES	Exon 19 Deletion		NO	Scheduled Follow-up Submission		2014-02-18	FEMALE	Lung Adenocarcinoma- Not Otherwise Specified (NOS)	No	C34.1	8140-03-01	C34.1	YES		0.7	NO		YES	NO			1	NO	Locoregional Recurrence
TCGA-J2-8194-01	6.8146	1						69	R-Lower		TCGA-J2-8194-F55317	TCGA-J2-8194	TCGA-J2-8194-01A		518	-25441			0	724	470		59						Scheduled Follow-up Submission	Partial Remission/Response	2014-01-03	FEMALE	Lung Adenocarcinoma Mixed Subtype	No	C34.3	8255-03-01	C34.3	YES		0.6	NO						0.8	NO	Distant Metastasis
TCGA-J2-A4AD-01	6.6426	1						61	L-Upper		TCGA-J2-A4AD-F55524	TCGA-J2-A4AD	TCGA-J2-A4AD-01A			-22414	178	550	0	287	524				NO			NO	Scheduled Follow-up Submission		2014-01-08	FEMALE	Lung Adenocarcinoma- Not Otherwise Specified (NOS)	No	C34.1	8140-03-01	C34.1	YES	110		NO		NO					NO	Locoregional Recurrence|Distant Metastasis
TCGA-J2-A4AE-01	5.8354	1						77	L-Upper		TCGA-J2-A4AE-F70639	TCGA-J2-A4AE	TCGA-J2-A4AE-01A			-28163	177		0	1079			89		NO			NO	Scheduled Follow-up Submission	Complete Remission/Response	2015-02-27	FEMALE	Lung Adenocarcinoma- Not Otherwise Specified (NOS)	No	C34.1	8140-03-01	C34.1	YES	90		NO		NO					NO
TCGA-J2-A4AG-01	6.1582	1						66	L-Upper		TCGA-J2-A4AG-F70848	TCGA-J2-A4AG	TCGA-J2-A4AG-01A			-24224	129		0	988					NO			NO	Scheduled Follow-up Submission	Complete Remission/Response	2015-03-10	FEMALE	Lung Adenocarcinoma- Not Otherwise Specified (NOS)	No	C34.1	8140-03-01	C34.1	YES	280		NO		NO					NO
TCGA-L4-A4E5-01	7.092	2						48	L-Upper		TCGA-L4-A4E5-F49031	TCGA-L4-A4E5	TCGA-L4-A4E5-01A			-17680	227		0	578			93	1	NO			NO	Scheduled Follow-up Submission	Complete Remission/Response	2013-09-25	FEMALE	Lung Adenocarcinoma- Not Otherwise Specified (NOS)	No	C34.1	8140-03-01	C34.1	YES	160		NO		NO			Central Lung		NO
TCGA-L4-A4E6-01	6.3977	1						67	R-Upper		TCGA-L4-A4E6-F51277	TCGA-L4-A4E6	TCGA-L4-A4E6-01A			-24631	22		0	435			98		NO			NO	Scheduled Follow-up Submission	Complete Remission/Response	2013-11-14	MALE	Lung Adenocarcinoma- Not Otherwise Specified (NOS)	No	C34.1	8140-03-01	C34.1	YES	210		NO		NO			Peripheral Lung		NO
TCGA-L9-A443-01	5.1736	1						63	L-Lower		TCGA-L9-A443-F46410	TCGA-L9-A443	TCGA-L9-A443-01A			-23062	50	193	0	116			61	1	NO			NO	Scheduled Follow-up Submission		2013-08-07	FEMALE	Lung Adenocarcinoma- Not Otherwise Specified (NOS)	No	C34.3	8140-03-01	C34.3	YES	230		NO		NO			Central Lung		NO
TCGA-L9-A444-01	6.7898	1						60	R-Upper		TCGA-L9-A444-F46270	TCGA-L9-A444	TCGA-L9-A444-01A			-22202	8		0	307			57	0	NO			NO	Scheduled Follow-up Submission	Complete Remission/Response	2013-08-05	FEMALE	Lung Adenocarcinoma- Not Otherwise Specified (NOS)	No	C34.1	8140-03-01	C34.1	YES	150		NO		NO			Central Lung		NO
TCGA-L9-A50W-01	5.9926	1						75	L-Lower		TCGA-L9-A50W-F50396	TCGA-L9-A50W	TCGA-L9-A50W-01A			-27414	205	442	0	266	389			0	YES	T790M	FISH	YES	Scheduled Follow-up Submission	Progressive Disease	2013-10-23	MALE	Lung Adenocarcinoma Mixed Subtype	No	C34.3	8255-03-01	C34.3	YES	240		NO		NO					NO	Distant Metastasis
TCGA-L9-A5IP-01	7.6738	2						40	R-Upper			TCGA-L9-A5IP	TCGA-L9-A5IP-01A			-14681	94	58	0						YES		FISH	YES			2013-05-14	FEMALE	Lung Adenocarcinoma- Not Otherwise Specified (NOS)	No	C34.1	8140-03-01	C34.1	YES	140		NO		NO
TCGA-L9-A743-01	7.2628	2						56	L-Upper		TCGA-L9-A743-F66554	TCGA-L9-A743	TCGA-L9-A743-01A			-20780	97		0	664			45	0	NO			NO	Scheduled Follow-up Submission	Complete Remission/Response	2014-10-20	MALE	Lung Adenocarcinoma- Not Otherwise Specified (NOS)	No	C34.1	8140-03-01	C34.1	YES	520		NO		NO			Central Lung		NO
TCGA-L9-A7SV-01	8.2735	2						69	L-Lower		TCGA-L9-A7SV-F65116	TCGA-L9-A7SV	TCGA-L9-A7SV-01A			-25298	42		0	565			55	0	NO			NO	Scheduled Follow-up Submission	Complete Remission/Response	2014-09-18	MALE	Lung Adenocarcinoma- Not Otherwise Specified (NOS)	No	C34.3	8140-03-01	C34.3	YES	220		NO		NO					NO
TCGA-L9-A8F4-01	7.4942	2						64	L-Upper		TCGA-L9-A8F4-F64972	TCGA-L9-A8F4	TCGA-L9-A8F4-01A			-23617	93		0	476			35	0	NO			NO	Scheduled Follow-up Submission		2014-09-16	FEMALE	Lung Adenocarcinoma- Not Otherwise Specified (NOS)	No	C34.1	8140-03-01	C34.1	YES	190		NO		NO					NO
TCGA-MN-A4N1-01	7.4617	2						60	R-Upper		TCGA-MN-A4N1-F56662	TCGA-MN-A4N1	TCGA-MN-A4N1-01A			-21939	330		0	827			55	0	YES		IHC	YES	Scheduled Follow-up Submission	Complete Remission/Response	2014-02-17	MALE	Lung Adenocarcinoma- Not Otherwise Specified (NOS)	No	C34.1	8140-03-01	C34.1	YES	140		NO	100	NO					NO
TCGA-MN-A4N4-01	6.3779	1						57	L-Upper		TCGA-MN-A4N4-F56667	TCGA-MN-A4N4	TCGA-MN-A4N4-01A			-20888	664		0	1175				1	NO			NO	Scheduled Follow-up Submission	Complete Remission/Response	2014-02-17	MALE	Lung Adenocarcinoma- Not Otherwise Specified (NOS)	No	C34.1	8140-03-01	C34.1	YES	120		NO	100	NO					NO
TCGA-MN-A4N5-01	7.4813	2						63	L-Upper		TCGA-MN-A4N5-F56665	TCGA-MN-A4N5	TCGA-MN-A4N5-01A			-23257	408		0	84			82	0	YES		IHC	YES	Scheduled Follow-up Submission		2014-02-17	MALE	Lung Adenocarcinoma- Not Otherwise Specified (NOS)	No	C34.1	8140-03-01	C34.1	YES	80		NO	100	NO					YES
TCGA-MP-A4SV-01	7.1856	2						67	L-Lower			TCGA-MP-A4SV	TCGA-MP-A4SV-01A			-24516	3964	2620	0				48		NO			NO			2013-04-02	MALE	Lung Adenocarcinoma- Not Otherwise Specified (NOS)	No	C34.3	8140-03-01	C34.3	YES	160		NO		NO
TCGA-MP-A4SW-01	6.7168	1						53	L-Upper			TCGA-MP-A4SW	TCGA-MP-A4SW-01A			-19640	3723	1778	0				102		NO			NO			2013-04-02	MALE	Lung Adenocarcinoma- Not Otherwise Specified (NOS)	No	C34.1	8140-03-01	C34.1	YES	130		NO		NO
TCGA-MP-A4SY-01	6.5016	1						61	R-Lower			TCGA-MP-A4SY	TCGA-MP-A4SY-01A			-22448	3620	1501	0				73	0	NO			NO			2013-04-02	MALE	Lung Adenocarcinoma- Not Otherwise Specified (NOS)	No	C34.3	8140-03-01	C34.3	YES	130		NO		NO			Central Lung
TCGA-MP-A4T4-01	7.7544	2						68	R-Lower			TCGA-MP-A4T4	TCGA-MP-A4T4-01A			-25052	2982	2617	0				53	0	NO			NO			2013-04-02	FEMALE	Lung Adenocarcinoma- Not Otherwise Specified (NOS)	No	C34.3	8140-03-01	C34.3	YES	440		NO		NO
TCGA-MP-A4T6-01	6.2277	1						76	L-Lower			TCGA-MP-A4T6	TCGA-MP-A4T6-01A			-27993	2778	1790	0				63		NO			NO			2013-04-02	FEMALE	Lung Adenocarcinoma- Not Otherwise Specified (NOS)	No	C34.3	8140-03-01	C34.3	YES	220		NO		NO			Peripheral Lung
TCGA-MP-A4T7-01	7.0535	2						75	R-Lower			TCGA-MP-A4T7	TCGA-MP-A4T7-01A			-27603	2710	167	0				57		NO			NO			2013-04-02	FEMALE	Lung Adenocarcinoma- Not Otherwise Specified (NOS)	No	C34.3	8140-03-01	C34.3	YES	280		NO		NO
TCGA-MP-A4T8-01	7.3977	2						68	L-Upper			TCGA-MP-A4T8	TCGA-MP-A4T8-01A			-25069	2352	161	0				102	1	NO			NO			2013-04-02	MALE	Lung Adenocarcinoma- Not Otherwise Specified (NOS)	No	C34.1	8140-03-01	C34.1	YES	130		NO		NO
TCGA-MP-A4T9-01	7.2786	2						54	L-Upper		TCGA-MP-A4T9-F41357	TCGA-MP-A4T9	TCGA-MP-A4T9-01A	1255		-19767	2332	1265	0		1248		106		NO			NO	Additional New Tumor Event	Progressive Disease	2013-03-15	FEMALE	Lung Adenocarcinoma- Not Otherwise Specified (NOS)	No	C34.1	8140-03-01	C34.1	YES	230		NO		NO					NO	Locoregional Recurrence
TCGA-MP-A4TA-01	7.6365	2						75	R-Upper			TCGA-MP-A4TA	TCGA-MP-A4TA-01A			-27513	2159	950	0				46	1	NO			NO			2013-04-02	FEMALE	Lung Adenocarcinoma- Not Otherwise Specified (NOS)	No	C34.1	8140-03-01	C34.1	YES	120		NO		NO			Peripheral Lung
TCGA-MP-A4TC-01	7.5922	2						77	R-Middle			TCGA-MP-A4TC	TCGA-MP-A4TC-01A			-28471	1604	74	0				68		NO			NO			2013-04-02	MALE	Lung Adenocarcinoma- Not Otherwise Specified (NOS)	No	C34.2	8140-03-01	C34.2	YES	230		NO		NO
TCGA-MP-A4TD-01	6.7518	1						71	L-Lower			TCGA-MP-A4TD	TCGA-MP-A4TD-01A			-25983	1471	307	0				61	0	NO			NO			2013-05-08	MALE	Lung Adenocarcinoma- Not Otherwise Specified (NOS)	No	C34.3	8140-03-01	C34.3	YES	230		NO		NO			Peripheral Lung
TCGA-MP-A4TE-01	6.6676	1						56	L-Lower		TCGA-MP-A4TE-F41405	TCGA-MP-A4TE	TCGA-MP-A4TE-01A			-20627	1009	896	0		845				NO			NO	Additional New Tumor Event		2013-03-18	MALE	Lung Adenocarcinoma- Not Otherwise Specified (NOS)	No	C34.3	8140-03-01	C34.3	YES	270		NO		YES	YES	G12C	Peripheral Lung		NO	Distant Metastasis
TCGA-MP-A4TF-01	7.4221	2						58	R-Upper			TCGA-MP-A4TF	TCGA-MP-A4TF-01A			-21387	784	336	0				77		NO			NO			2013-04-02	FEMALE	Lung Adenocarcinoma- Not Otherwise Specified (NOS)	No	C34.1	8140-03-01	C34.1	YES	240		NO		NO			Peripheral Lung
TCGA-MP-A4TH-01	6.8161	1						70	L-Lower		TCGA-MP-A4TH-F69949	TCGA-MP-A4TH	TCGA-MP-A4TH-01A			-25759	78		0	741			73		NO			NO	Scheduled Follow-up Submission	Complete Remission/Response	2015-01-22	FEMALE	Lung Adenocarcinoma- Not Otherwise Specified (NOS)	No	C34.3	8140-03-01	C34.3	YES	200		NO		NO			Peripheral Lung		NO
TCGA-MP-A4TI-01	7.4862	2						72	R-Lower			TCGA-MP-A4TI	TCGA-MP-A4TI-01A			-26565	780	429	0						YES			NO			2013-04-02	MALE	Lung Adenocarcinoma- Not Otherwise Specified (NOS)	No	C34.3	8140-03-01	C34.3	YES	200		NO		YES	YES	G12C
TCGA-MP-A4TJ-01	6.6953	1						62	R-Upper			TCGA-MP-A4TJ	TCGA-MP-A4TJ-01A			-22875	2204	339	0				29		NO			NO			2013-04-02	FEMALE	Lung Signet Ring Adenocarcinoma	No	C34.1	8490-03-01	C34.1	YES	270		NO		NO			Central Lung
TCGA-MP-A4TK-01	7.1134	2						56	R-Lower		TCGA-MP-A4TK-F41426	TCGA-MP-A4TK	TCGA-MP-A4TK-01A			-20581	3744	582	0		545		88		NO			NO	Additional New Tumor Event	Progressive Disease	2013-03-18	FEMALE	Lung Adenocarcinoma- Not Otherwise Specified (NOS)	No	C34.3	8140-03-01	C34.3	YES	170		NO		NO					NO	Distant Metastasis
TCGA-MP-A5C7-01	7.113	2						76	L-Upper		TCGA-MP-A5C7-F67079	TCGA-MP-A5C7	TCGA-MP-A5C7-01A			-28015	1555		0	2248			105	1	NO			NO	Scheduled Follow-up Submission	Complete Remission/Response	2014-10-30	FEMALE	Lung Adenocarcinoma- Not Otherwise Specified (NOS)	No	C34.1	8140-03-01	C34.1	YES	170		NO		NO			Central Lung		NO
TCGA-NJ-A4YF-01	7.2335	2						50	R-Upper		TCGA-NJ-A4YF-F50858	TCGA-NJ-A4YF	TCGA-NJ-A4YF-01A			-18584	1819		0	2161			77.5		NO			NO	Scheduled Follow-up Submission	Stable Disease	2013-11-01	FEMALE	Lung Adenocarcinoma Mixed Subtype	No	C34.1	8255-03-01	C34.1	YES	90		NO		NO					NO
TCGA-NJ-A4YG-01	6.2388	1						65	L-Upper		TCGA-NJ-A4YG-F70643	TCGA-NJ-A4YG	TCGA-NJ-A4YG-01A			-23812	1691		0	2261									Scheduled Follow-up Submission	Stable Disease	2015-02-27	MALE	Lung Adenocarcinoma- Not Otherwise Specified (NOS)	No	C34.1	8255-03-01	C34.1	YES	280		NO							NO
TCGA-NJ-A4YI-01	5.7913	1						87	R-Upper		TCGA-NJ-A4YI-F50887	TCGA-NJ-A4YI	TCGA-NJ-A4YI-01A			-31867	1385	4	0				52						Scheduled Follow-up Submission	Stable Disease	2013-11-01	FEMALE	Lung Papillary Adenocarcinoma	No	C34.1	8550-03-01	C34.1	YES	200		NO							NO
TCGA-NJ-A4YP-01	6.6045	1						52	R-Lower		TCGA-NJ-A4YP-F50888	TCGA-NJ-A4YP	TCGA-NJ-A4YP-01A			-19106	615		0	50					NO			NO	Scheduled Follow-up Submission	Stable Disease	2013-11-01	MALE	Lung Papillary Adenocarcinoma	No	C34.3	8255-03-01	C34.3	YES	70		NO		NO					YES
TCGA-NJ-A4YQ-01	7.4984	2						69	L-Upper		TCGA-NJ-A4YQ-F70646	TCGA-NJ-A4YQ	TCGA-NJ-A4YQ-01A			-25427	592		0	1432					NO			NO	Scheduled Follow-up Submission	Stable Disease	2015-02-27	FEMALE	Lung Adenocarcinoma- Not Otherwise Specified (NOS)	No	C34.1	8255-03-01	C34.1	YES	80		NO		NO					NO
TCGA-NJ-A55A-01	6.046	1						76	R-Lower		TCGA-NJ-A55A-F70649	TCGA-NJ-A55A	TCGA-NJ-A55A-01A			-28022	1199		0	15					NO			NO	Scheduled Follow-up Submission	Stable Disease	2015-02-27	FEMALE	Lung Adenocarcinoma- Not Otherwise Specified (NOS)	No	C34.3	8550-03-01	C34.3	YES	160		NO		NO					YES
TCGA-NJ-A55O-01	6.3808	1						56	R-Upper		TCGA-NJ-A55O-F50898	TCGA-NJ-A55O	TCGA-NJ-A55O-01A			-20628	428		0	13					NO			NO	Scheduled Follow-up Submission	Stable Disease	2013-11-01	FEMALE	Mucinous (Colloid) Carcinoma	No	C34.1	8480-03-01	C34.1	YES	150		NO		NO					YES
TCGA-NJ-A55R-01	6.6486	1						67	L-Upper		TCGA-NJ-A55R-F70652	TCGA-NJ-A55R	TCGA-NJ-A55R-01A			-24738	499		0	603					NO			NO	Scheduled Follow-up Submission	Stable Disease	2015-02-27	MALE	Lung Adenocarcinoma- Not Otherwise Specified (NOS)	No	C34.1	8230-03-01	C34.1	YES	200		NO		NO					YES
TCGA-NJ-A7XG-01	5.8566	1						49	L-Upper		TCGA-NJ-A7XG-F71390	TCGA-NJ-A7XG	TCGA-NJ-A7XG-01A			-18127	72		0	617					YES	Other			Scheduled Follow-up Submission	Stable Disease	2015-03-25	MALE	Lung Adenocarcinoma- Not Otherwise Specified (NOS)	No	C34.1	8140-03-01	C34.1	YES	140		NO		YES	NO				NO
TCGA-O1-A52J-01	7.0038	2						74	L-Lower			TCGA-O1-A52J	TCGA-O1-A52J-01A			-27223	2000	1798	0					1	NO			NO			2013-04-11	FEMALE	Lung Adenocarcinoma- Not Otherwise Specified (NOS)	No	C34.3	8140-03-01	C34.3	YES	50		NO		NO
TCGA-S2-AA1A-01	5.8194	1						68	R-Upper		TCGA-S2-AA1A-F67520	TCGA-S2-AA1A	TCGA-S2-AA1A-01A			-24903	95		0	513			65		NO			NO	Scheduled Follow-up Submission	Complete Remission/Response	2014-11-07	FEMALE	Lung Bronchioloalveolar Carcinoma Mucinous	No	C34.1	8253-03-01	C34.1	YES	170		NO		NO					NO
[truncated: 38 more columns]

## Sheet: Sheet3
CENPO	1low2high	age	0<60,1	gender1male2female	other_dx	other_dx	M	N	T	2	stage	stage	person_neoplasm_cancer_status	person_neoplasm_cancer_status	rad1at1on_therapy	rad1at1on_therapy	residual_tumor	residual_tumor残余肿瘤
4.4662	1	70	1	2	No	0	1	0	2a	2	Stage 1	1	TUMOR FREE	0	NO	0	R0	0
4.8961	1	60	1	1	No	0	0	0	2	2	Stage 1	1	TUMOR FREE	0	NO	0	R0	0
5.0867	1	75	1	2	No	0	1	2	2	1	Stage 3	3
5.1147	1	70	1	1	No	0	1	0	1b	1	Stage 1	1	TUMOR FREE	0	NO	0
5.1294	1	52	0	2	No	0	0	0	1a	1	Stage 1	1	TUMOR FREE	0	NO	0
5.1736	1	63	1	2	Yes, History of Prior Malignancy	1	1	0	1a	2	Stage 1	1	TUMOR FREE	0	NO	0	R0	0
5.4871	1	70	1	2	Yes	1		2	2b	2	Stage 3	3	WITH TUMOR	1	NO	0	R1	1
5.5026	1	80	1	1	No	0	0	0	2a	4	Stage 1	1	TUMOR FREE	0	NO	0	R0	0
5.5151	1	71	1	1	No	0	0	0	4	2	Stage 3	3			NO	0	R0	0
5.5428	1	60	1	2	No	0	0	0	2a	1	Stage 1	1	TUMOR FREE	0	NO	0
5.552	1	78	1	2	No	0	0	0	1a	1	Stage 1	1	TUMOR FREE	0	NO	0	R0	0
5.5527	1	63	1	2	No	0	0	0	1a	2	Stage 1	1	TUMOR FREE	0	NO	0
5.5562	1		0	1	No	0	0	0	2	2	Stage 1	1	TUMOR FREE	0	NO	0	R0	0
5.5908	1	51	0	2	No	0	0	1	2	1	Stage 2	2	WITH TUMOR	1	YES	1	R0	0
5.6188	1	61	1	2	No	0	0	2	1b	3	Stage 3	3	WITH TUMOR	1	NO	0	R0	0
5.6454	1	69	1	1	No	0	0	0	3	1	[Discrepancy]	[Discrepancy]	TUMOR FREE	0			R0	0
5.6472	1	56	0	1	No	0	0	0	1	1	Stage 1	1	TUMOR FREE	0	NO	0	R0	0
5.6775	1	68	1	2	Yes	1	1	0	1a	1	Stage 1	1	TUMOR FREE	0	NO	0	R0	0
5.6796	1	71	1	1	No	0	1	0	1b	2	Stage 1	1	TUMOR FREE	0	NO	0	R0	0
5.6912	1	64	1	2	No	0	1	1	2a	1	Stage 2	2	TUMOR FREE	0	NO	0	R0	0
5.7213	1	78	1	1	No	0	1	1	1b	2	Stage 2	2	TUMOR FREE	0	NO	0	RX	3
5.7227	1	73	1	1	Yes, History of Synchronous/Bilateral Malignancy	1	1	0	2a	1	Stage 1	1	TUMOR FREE	0	NO	0	R0	0
5.7322	1	59	0	2	No	0	1	2	1b	3	Stage 3	3	TUMOR FREE	0	YES	1
5.7355	1	70	1	2	No	0	0	0	3	2	Stage 2	2	TUMOR FREE	0	NO	0	R0	0
5.7687	1	63	1	2	No	0	1	NX	2a	2	Stage 1	1	TUMOR FREE	0	NO	0
5.7774	1	85	1	1	No	0			2b	2			TUMOR FREE	0	NO	0
5.7913	1	87	1	2	No	0	0	2	2	1	Stage 3	3			NO	0
5.7989	1	67	1	2	Yes	1	0	NX	1b	2	Stage 1	1	TUMOR FREE	0	NO	0
5.8083	1		0	2	No	0	0	1	2	2	Stage 2	2	WITH TUMOR	1	NO	0	R0	0
5.8166	1	65	1	1	No	0	0	0	2	1	Stage 1	1	TUMOR FREE	0	NO	0	R0	0
5.8194	1	68	1	2	No	0	0	0	1b	1	Stage 1	1	TUMOR FREE	0	NO	0	R0	0
5.8354	1	77	1	2	No	0	1	0	1a	2	Stage 1	1	TUMOR FREE	0	NO	0	R0	0
5.8356	1	81	1	1	No	0	1	2	2a	4	Stage 4	4	WITH TUMOR	1	NO	0
5.8566	1	49	0	1	No	0	0	1	4	1	Stage 3	3	WITH TUMOR	1	NO	0
5.8738	1	72	1	2	Yes	1	0	0	1	4	Stage 1	1	WITH TUMOR	1			R0	0
5.8777	1	62	1	1	No	0	1	1	4	1	Stage 4	4			NO	0	R0	0
5.8781	1	86	1	2	Yes	1	0	0	1	1	Stage 1	1	TUMOR FREE	0	YES	1
5.8789	1	75	1	2	No	0	1	0	1a	1	Stage 1	1	TUMOR FREE	0	NO	0	R0	0
5.8831	1	70	1	2	No	0	0	0	1a	4	Stage 1	1	TUMOR FREE	0	NO	0	R0	0
5.9152	1	59	0	2	No	0	0	2	4	2	Stage 3	3	WITH TUMOR	1	NO	0	R1	1
5.9167	1	78	1	2	No	0	0	0	2	3	Stage 1	1	TUMOR FREE	0	NO	0	R0	0
5.9328	1	45	0	2	No	0	0	2	3	4	Stage 3	3	WITH TUMOR	1	YES	1
5.9469	1	51	0	2	No	0	0	0	4	2	Stage 3	3	TUMOR FREE	0	NO	0
5.9776	1	72	1	1	No	0	0	0	2	1	Stage 1	1			NO	0	R0	0
5.9926	1	75	1	1	No	0	1	1	1b	1	Stage 2	2	WITH TUMOR	1	NO	0	R0	0
5.9958	1	66	1	1	Yes, History of Prior Malignancy	1	0	0	1a	2	Stage 1	1	TUMOR FREE	0	NO	0	R0	0
6.0026	1	74	1	2	No	0	0	NX	2	1	Stage 1	1	TUMOR FREE	0	NO	0	R0	0
6.0026	1	67	1	2	No	0	1	0	1a	1	Stage 1	1	WITH TUMOR	1	NO	0	R0	0
6.0124	1	42	0	1	No	0	0	0	1	1	Stage 1	1	TUMOR FREE	0	NO	0	R0	0
6.0166	1	67	1	2	No	0	0	0	1	2	Stage 1	1	WITH TUMOR	1	YES	1	R0	0
6.0331	1	65	1	1	No	0	0	0	2	1	Stage 1	1	WITH TUMOR	1	NO	0	R0	0
6.0345	1	70	1	2	Yes, History of Prior Malignancy	1	1	0	1a	2	Stage 1	1	TUMOR FREE	0	NO	0	R0	0
6.046	1	76	1	2	No	0	0	0	2	3	Stage 1	1	TUMOR FREE	0	NO	0
6.0515	1	77	1	2	No	0	1	0	3	1	Stage 2	2	WITH TUMOR	1	NO	0	R0	0
6.0594	1	55	0	2	No	0	1	0	1a	2	Stage I	1	TUMOR FREE	0	NO	0
6.0599	1	73	1	2	Yes	1	0	1	2a	1	Stage 2	2	WITH TUMOR	1	NO	0	R0	0
6.0748	1	72	1	2	Yes	1	1	0	1b	2	Stage 1	1	TUMOR FREE	0	NO	0
6.078	1	55	0	2	No	0	0	1	2	1	Stage 2	2	TUMOR FREE	0	NO	0	R0	0
6.0849	1	65	1	2	No	0	0	1	1	1	Stage 2	2	TUMOR FREE	0	NO	0	R0	0
6.1168	1	74	1	1	No	0	0	0	1a	2	Stage 1	1	TUMOR FREE	0	YES	1	R0	0
6.1213	1	84	1	2	No	0	0	0	2	2	Stage 1	1	TUMOR FREE	0			R0	0
6.1511	1	50	0	1	No	0	0	1	2a	2	Stage 2	2	TUMOR FREE	0	NO	0	R0	0
6.1565	1	64	1	2	No	0	1	0	2a	1	Stage 1	1	TUMOR FREE	0	NO	0	R0	0
6.1582	1	66	1	2	No	0	1	0	1b	1	Stage 1	1	TUMOR FREE	0	NO	0	R0	0
6.1606	1	70	1	2	No	0	0	0	1b	2	Stage 1	1	WITH TUMOR	1	NO	0	R0	0
6.1629	1	59	0	2	No	0	0	0	2a	2	Stage 1	1	TUMOR FREE	0	NO	0
6.1719	1	71	1	2	No	0	0	1	2	1	Stage 2	2	WITH TUMOR	1	NO	0
6.1853	1	79	1	2	No	0	0	1	1	2	Stage 2	2	WITH TUMOR	1	NO	0	R0	0
6.1905	1	65	1	1	No	0	0	1	2	2	Stage 2	2	TUMOR FREE	0			R0	0
6.2097	1	60	1	2	No	0	0	0	2a	2	Stage 1	1	WITH TUMOR	1			R0	0
6.2106	1	48	0	2	No	0	0	0	2	2	Stage 1	1	WITH TUMOR	1	NO	0	RX	3
6.2146	1	59	0	2	No	0	1	1	2	1	Stage 2	2	WITH TUMOR	1	NO	0
6.2181	1	72	1	2	No	0	1	0	1b	2	Stage 1	1	TUMOR FREE	0	NO	0	R0	0
6.2277	1	82	1	2	No	0	0	0	2	1	Stage 1	1	TUMOR FREE	0
6.2277	1	76	1	2	No	0	1	2	1	2	Stage 3	3	TUMOR FREE	0	NO	0	R0	0
6.2283	1	63	1	2	No	0	0	0	2a	2	Stage 1	1	TUMOR FREE	0	NO	0	R0	0
6.2283	1	65	1	2	Yes, History of Prior Malignancy	1	1	1	2a	2	Stage 2	2	TUMOR FREE	0	NO	0
6.2388	1	65	1	1	No	0	0	0	2	2	Stage 1	1	TUMOR FREE	0	NO	0
6.2417	1	84	1	1	Yes	1	0	1	2	1	Stage 2	2			YES	1	R0	0
6.2419	1	74	1	1	Yes, History of Synchronous/Bilateral Malignancy	1, History of Synchro0us/Bilateral Malignancy	0	0	1b	1	Stage 1	1	TUMOR FREE	0	NO	0	R0	0
6.2445	1	60	1	2	No	0	1	0	1a	1	Stage 1	1	TUMOR FREE	0	NO	0	R0	0
6.2523	1	41	0	1	No	0	1	1	1a	1	Stage 4	4	WITH TUMOR	1	NO	0	R0	0
6.2552	1	59	0	2	No	0	1	1	1a	1	Stage 2	2	TUMOR FREE	0	NO	0
6.2597	1	60	1	2	No	0	1	0	1b	1	Stage 1	1	TUMOR FREE	0	NO	0
6.2615	1	45	0	2	No	0	0	0	1a	2	Stage 1	1	TUMOR FREE	0	NO	0
6.264	1	84	1	1	No	0	0	0	2	2	Stage 1	1	WITH TUMOR	1	NO	0	R0	0
6.2656	1	76	1	1	No	0	0	0	2	2	Stage 1	1					R0	0
6.2664	1	67	1	2	Yes	1	0	0	2	1	Stage 1	1	WITH TUMOR	1	NO	0	R0	0
6.2698	1	77	1	2	No	0	0	0	1b	2	Stage 1	1	TUMOR FREE	0	NO	0	R0	0
6.2699	1	47	0	1	No	0	0	2	2	2	Stage 3	3	WITH TUMOR	1	YES	1
6.2769	1	78	1	1	No	0	1	0	2b	2	Stage 2	2	TUMOR FREE	0	NO	0	R0	0
6.2832	1	74	1	1	Yes, History of Prior Malignancy	1	1	0	2	1	Stage 1	1	TUMOR FREE	0	NO	0	R0	0
6.2942	1	61	1	2	No	0	0	0	1b	3	Stage 1	1	TUMOR FREE	0	NO	0	R0	0
6.3026	1	64	1	1	Yes	1	0	0	3	1	Stage 2	2	TUMOR FREE	0
6.3059	1	60	1	2	Yes	1	1	0	1	3	Stage 1	1	TUMOR FREE	0	NO	0
6.323	1	77	1	1	No	0	1	0	3	2	Stage 2	2	WITH TUMOR	1	NO	0
6.3286	1	72	1	1	No	0	0	0	2	1	Stage 1	1	TUMOR FREE	0	NO	0	R0	0
6.3306	1	72	1	1	No	0	0	0	1	2	Stage 1	1	WITH TUMOR	1	NO	0	R0	0
6.3307	1	76	1	1	No	0	1	0	2a	3	Stage 1	1	WITH TUMOR	1	NO	0	R0	0
6.3308	1	77	1	1	No	0	1	1	3	2	Stage 3	3	WITH TUMOR	1	NO	0	R0	0
6.334	1		0	2	No	0	0	2	2	1	Stage 3	3	TUMOR FREE	0	NO	0	R0	0
6.3404	1	76	1	2	No	0	1	0	1a	1	Stage 1	1	TUMOR FREE	0	NO	0	R0	0
6.3413	1	75	1	1	No	0	0	0	1	2	Stage 1	1			NO	0	R0	0
6.3432	1	78	1	2	No	0	1	0	2a	2	Stage 1	1	WITH TUMOR	1	NO	0	R0	0
6.3456	1	70	1	1	No	0	1	0	2	2	Stage 1	1	TUMOR FREE	0	NO	0
6.3501	1	75	1	2	Yes, History of Prior Malignancy	1	0	0	2a	2	Stage 1	1	TUMOR FREE	0	NO	0
6.3508	1	45	0	1	No	0	0	0	2	2	Stage 1	1	WITH TUMOR	1	NO	0	R0	0
6.3513	1	80	1	2	Yes	1	0	0	2	1	Stage 1	1	TUMOR FREE	0	NO	0	R0	0
6.3573	1	68	1	1	No	0	1	0	1	3	Stage 1	1	WITH TUMOR	1	NO	0	R0	0
6.3623	1		0	1	No	0	0	0	3	2	Stage 2	2	TUMOR FREE	0	NO	0	R0	0
6.3677	1	67	1	2	No	0	1	0	2	1	Stage 1	1	WITH TUMOR	1	NO	0
6.3779	1	57	0	1	No	0	0	0	1b	1	Stage 1	1	TUMOR FREE	0	NO	0	R0	0
6.3785	1	75	1	1	No	0	0	NX	1	1	Stage 1	1	TUMOR FREE	0
6.3808	1	56	0	2	No	0	0	1	1b	1	Stage 2	2	TUMOR FREE	0	NO	0
6.3829	1	61	1	2	No	0		NX	1	1	Stage 1	1	TUMOR FREE	0	NO	0
6.3841	1	69	1	2	Yes, History of Prior Malignancy	1	0	0	1b	2	Stage 1	1	TUMOR FREE	0	NO	0
6.389	1	46	0	1	No	0	0	1	2a	1	Stage 2	2	TUMOR FREE	0	YES	1	R0	0
6.3898	1	61	1	2	No	0	0	0	1	1	Stage 1	1			NO	0	R0	0
6.3921	1	50	0	2	No	0	0	0	1a	3	Stage 1	1	TUMOR FREE	0	NO	0	R0	0
6.3925	1	59	0	1	No	0	0	1	3	1	Stage 3	3	TUMOR FREE	0	NO	0	RX	3
6.3977	1	67	1	1	No	0	0	0	1	2	Stage 1	1	TUMOR FREE	0	NO	0	R0	0
6.398	1	54	0	2	No	0	0	0	2b	2	Stage 2	2	TUMOR FREE	0	NO	0	R0	0
6.4144	1	67	1	1	No	0	0	0	2b	2	Stage 2	2			NO	0
6.4204	1	66	1	1	Yes	1	0	2	2	3	Stage 3	3	WITH TUMOR	1	YES	1	RX	3
6.4229	1	72	1	2	Yes, History of Prior Malignancy	1	1	0	3	2	Stage 2	2	TUMOR FREE	0	NO	0	R0	0
6.4353	1	64	1	2	No	0	0	0	2a	1	Stage 1	1	WITH TUMOR	1	YES	1	R1	1
6.4364	1	59	0	2	No	0	0	0	1b	2	Stage 1	1	TUMOR FREE	0	NO	0	R0	0
6.4408	1	59	0	2	No	0	1	0	2a	1	Stage 1	1	TUMOR FREE	0	NO	0	R0	0
6.4425	1	77	1	2	No	0	0	0	1	2	Stage 1	1			NO	0	R0	0
6.4431	1	73	1	1	No	0	0	0	2	2	Stage 1	1	WITH TUMOR	1	NO	0	R0	0
6.4507	1	71	1	1	No	0	1	1	2a	1	Stage 2	2	WITH TUMOR	1	NO	0	R1	1
6.4523	1	58	0	1	No	0	0	0	1a	2	Stage 1	1	TUMOR FREE	0	NO	0	R0	0
6.4545	1	52	0	2	No	0	0	0	2a	2	Stage 1	1	TUMOR FREE	0	NO	0	R0	0
6.4549	1	74	1	2	Yes	1	0	0	2	2	Stage 1	1	TUMOR FREE	0	NO	0	R0	0
6.4609	1	75	1	2	No	0	0	0	2b	2	Stage 2	2			NO	0	R0	0
6.4615	1		0	2	No	0	0	0	2	2	Stage 1	1	TUMOR FREE	0	NO	0	R0	0
6.4675	1	74	1	2	No	0	0	0	2	2	Stage 1	1	TUMOR FREE	0	NO	0
6.4736	1	62	1	1	Yes	1	0	0	2	2	Stage 1	1					RX	3
6.4798	1	67	1	2	No	0	1	0	2a	2	Stage 1	1	WITH TUMOR	1	NO	0
6.4824	1	74	1	1	No	0	0	1	2	3	Stage 2	2	TUMOR FREE	0	NO	0	R0	0
6.4844	1	69	1	2	No	0	0	0	3	2	Stage 2	2	WITH TUMOR	1	NO	0	R1	1
6.4904	1	77	1	1	No	0	1	0	2	2	Stage 4	4	WITH TUMOR	1	NO	0	R0	0
6.4943	1	81	1	1	No	0	0	1	2	1	Stage 2	2	TUMOR FREE	0	NO	0	R0	0
6.4997	1	69	1	2	Yes	1	0	0	1	1	Stage 1	1	TUMOR FREE	0	NO	0	R0	0
6.5008	1	84	1	2	No	0	0	0	1	2	Stage I	1			YES	1	R0	0
6.5016	1	61	1	1	No	0	0	1	2	3	Stage 2	2	TUMOR FREE	0	NO	0	R0	0
6.5035	1	62	1	1	Yes	1	1	0	3	2	Stage 2	2	TUMOR FREE	0	NO	0
6.5051	1	43	0	1	No	0	0	0	2	1	Stage 1	1	WITH TUMOR	1	NO	0	R0	0
6.5232	1	60	1	1	No	0	0	0	1	3	Stage 1	1	WITH TUMOR	1	NO	0
6.5345	1	68	1	1	No	0	0	0	3	2	Stage 2	2	WITH TUMOR	1	NO	0
6.5373	1	85	1	2	No	0	1	NX	2	1	Stage 1	1	TUMOR FREE	0	YES	1
6.5395	1	56	0	2	Yes, History of Synchronous/Bilateral Malignancy	1	1	0	1	2	Stage 1	1			NO	0	R0	0
6.5546	1	69	1	2	No	0	1	2	2	1	Stage 3	3	WITH TUMOR	1	NO	0	R1	1
6.555	1	60	1	1	No	0	0	0	1b	2	Stage 1	1	TUMOR FREE	0	NO	0	RX	3
6.5639	1	70	1	2	No	0	0	2	2	1	Stage 3	3	WITH TUMOR	1	YES	1	R0	0
6.5643	1	75	1	2	Yes, History of Prior Malignancy	1	1	0	1a	1	Stage 1	1	TUMOR FREE	0	NO	0	R0	0
6.5645	1	70	1	2	No	0	0	0	1	2	Stage 1	1	TUMOR FREE	0			R0	0
6.5679	1	72	1	2	No	0	0	1	2b	1	Stage 2	2	TUMOR FREE	0	NO	0	R0	0
6.5764	1	75	1	2	No	0	1	0	1a	1	Stage 1	1	TUMOR FREE	0	NO	0
6.5766	1	57	0	2	No	0	0	0	1a	1	Stage 1	1	TUMOR FREE	0	NO	0	R0	0
6.5916	1	65	1	2	Yes	1	0	0	1	2	Stage 1	1	TUMOR FREE	0	NO	0	R0	0
6.6045	1	52	0	1	No	0	0	0	2a	2	Stage 1	1	TUMOR FREE	0	NO	0
6.605	1	58	0	2	No	0	0	0	2a	2	Stage 1	1	TUMOR FREE	0			R0	0
6.6081	1	65	1	2	No	0	0	0	2	2	Stage 1	1			NO	0	R0	0
6.6121	1	59	0	2	No	0	1	0	2	1	Stage 1	1	TUMOR FREE	0	NO	0	R0	0
6.6152	1	76	1	2	No	0	1	0	1a	3	Stage 1	1	TUMOR FREE	0	NO	0	R0	0
6.6228	1	62	1	2	No	0	1	0	3	1	Stage 2	2					R0	0
6.6267	1	65	1	2	No	0	1	1	1	2	Stage 2	2	WITH TUMOR	1	NO	0
6.6282	1	69	1	2	No	0	0	0	2a	1	Stage 1	1	TUMOR FREE	0			R0	0
6.6364	1	77	1	1	No	0	0	0	1	2	Stage 1	1	TUMOR FREE	0	NO	0
6.6376	1	61	1	1	No	0	0	2	2	1	Stage 3	3	TUMOR FREE	0			R0	0
6.6426	1	61	1	2	No	0	1	0	1a	2	Stage 1	1	WITH TUMOR	1	NO	0	RX	3
6.6435	1	57	0	1	No	0	0	0	2	1	Stage 1	1	TUMOR FREE	0			R0	0
6.6451	1	64	1	2	No	0	0	1	1b	2	Stage 2	2			NO	0	R0	0
6.6484	1	61	1	2	No	0	0	1	2	1	Stage 2	2	WITH TUMOR	1	NO	0	R0	0
6.6486	1	67	1	1	No	0	1	0	1b	2	Stage 1	1	TUMOR FREE	0	NO	0
6.6546	1	61	1	2	No	0	1	0	2a	1	Stage 1	1	TUMOR FREE	0	NO	0	R0	0
6.6579	1	58	0	2	Yes, History of Synchronous/Bilateral Malignancy	1	0	0	1b	2	Stage 1	1	TUMOR FREE	0	NO	0	R0	0
6.663	1	71	1	2	No	0	0	1	2	2	Stage 2	2	TUMOR FREE	0	NO	0	R0	0
6.6668	1	74	1	1	No	0	0	0	2a	2	[Discrepancy]	[Discrepancy]	WITH TUMOR	1	NO	0	R0	0
6.6676	1	56	0	1	No	0	1	0	2b	2	Stage 2	2	WITH TUMOR	1	NO	0	RX	3
6.6722	1	51	0	2	No	0		0	2a	2	Stage 1	1	TUMOR FREE	0	NO	0
6.6795	1	57	0	2	No	0	0	1	2	2	[Discrepancy]	[Discrepancy]	WITH TUMOR	1	YES	1
6.6804	1	81	1	1	Yes, History of Synchronous/Bilateral Malignancy	1	0	0	2a	1	Stage 1	1	TUMOR FREE	0	NO	0
6.6811	1	56	0	1	No	0	0	0	1b	1	Stage 1	1	TUMOR FREE	0	NO	0	R0	0
6.6856	1	62	1	2	No	0	0	1	1b	1	Stage 2	2	TUMOR FREE	0			R0	0
6.6953	1	62	1	2	No	0	0	0	1	2	Stage 1	1			NO	0	R0	0
6.6978	1	65	1	1	No	0	1	0	2a	1	Stage 1	1	TUMOR FREE	0	NO	0
6.6992	1	72	1	1	No	0	1	0	1	2	Stage 1	1	TUMOR FREE	0	NO	0	RX	3
6.7048	1	57	0	2	No	0	0	0	2b	TX	[Discrepancy]	[Discrepancy]	TUMOR FREE	0	NO	0	R0	0
6.705	1	64	1	1	No	0	1	NX	TX	1	Stage 4	4	WITH TUMOR	1	NO	0	RX	3
6.7064	1	83	1	1	No	0	0	0	1b	4	Stage 1	1	TUMOR FREE	0	NO	0
6.7071	1	74	1	2	No	0	0	0	4	2	Stage 3	3	WITH TUMOR	1	NO	0	R0	0
6.71	1	66	1	2	No	0	0	0	2	2	Stage 1	1					R0	0
6.7168	1	53	0	1	No	0	0	1	2	2	Stage 2	2			NO	0	R0	0
6.7178	1	79	1	2	No	0	0	0	2	2	Stage 1	1	TUMOR FREE	0	NO	0	R0	0
6.7214	1	73	1	2	No	0	0	0	2	TX	Stage 1	1	TUMOR FREE	0			RX	3
6.7224	1	49	0	2	No	0	1	NX	TX	2	Stage 4	4	WITH TUMOR	1	NO	0
6.7341	1	84	1	1	No	0	1	0	2a	3	Stage 1	1	TUMOR FREE	0	NO	0
6.7431	1	59	0	1	No	0	0	0	3	1	Stage 2	2	TUMOR FREE	0	NO	0	R0	0
6.7439	1	73	1	2	No	0	0	1	1b	2	Stage 2	2	TUMOR FREE	0	NO	0
6.7458	1	83	1	2	No	0	0	2	2a	1	Stage 3	3	TUMOR FREE	0	NO	0	R0	0
6.7515	1	76	1	2	No	0	0	1	1	1	Stage 2	2	WITH TUMOR	1	NO	0	R0	0
6.7517	1	70	1	1	No	0	0	0	1a	2	Stage 1	1	TUMOR FREE	0	NO	0	R0	0
6.7518	1	71	1	1	Yes, History of Prior Malignancy	1	0	2	2	2	Stage 3	3			NO	0	RX	3
6.7519	1	42	0	2	No	0	0	2	2	1	Stage 3	3	WITH TUMOR	1	YES	1	R0	0
6.7542	1	70	1	1	No	0	1	0	1a	2	Stage 1	1	TUMOR FREE	0	NO	0	RX	3
6.7688	1	79	1	1	No	0	0	0	2a	1	Stage 1	1	TUMOR FREE	0	NO	0	R0	0
6.7705	1	49	0	1	Yes, History of Prior Malignancy	1	1	0	1b	2	Stage 1	1	TUMOR FREE	0	NO	0	RX	3
6.7708	1	64	1	1	Yes	1	0	0	2a	1	Stage 1	1	WITH TUMOR	1	NO	0
6.7717	1	71	1	2	Yes	1	1	1	1b	2	Stage 2	2	WITH TUMOR	1	NO	0	R0	0
6.7858	1	55	0	2	No	0	1	0	2a	1	Stage 1	1	TUMOR FREE	0	NO	0	R0	0
6.7863	1	76	1	2	No	0	1	0	1	1	Stage 1	1	WITH TUMOR	1	YES	1	R0	0
6.7892	1	80	1	1	Yes, History of Synchronous/Bilateral Malignancy	1	0	0	1a	1	Stage 1	1	WITH TUMOR	1	NO	0	R0	0
6.7898	1	60	1	2	Yes, History of Prior Malignancy	1	1	0	1a	2	Stage 1	1	TUMOR FREE	0	NO	0	R0	0
6.7954	1	62	1	2	No	0	0	0	2	2	Stage 1	1	TUMOR FREE	0			R0	0
6.805	1	42	0	2	Yes	1	0	0	2a	1	Stage 1	1	TUMOR FREE	0	NO	0	R0	0
6.8109	1	58	0	2	No	0	1	0	1	2	Stage 1	1	TUMOR FREE	0	NO	0
6.8113	1	60	1	1	No	0	0	0	2	3	Stage 1	1	WITH TUMOR	1	NO	0	R0	0
6.813	1	60	1	1	No	0	0	2	3	3	Stage 3	3	TUMOR FREE	0			R0	0
6.8146	1	69	1	2	Yes, History of Prior Malignancy	1	1	0	3	1	Stage 2	2	WITH TUMOR	1	YES	1
6.8161	1	70	1	2	No	0	0	0	1a	1	Stage 1	1	TUMOR FREE	0	NO	0	R0	0
6.8187	1	73	1	2	No	0	0	0	1	2	Stage 1	1	TUMOR FREE	0	NO	0	R0	0
6.8339	1	70	1	2	No	0	1	0	2	1	Stage 4	4					R1	1
6.835	1	79	1	2	No	0	0	0	1	3	Stage 1	1	TUMOR FREE	0	NO	0	R0	0
6.84	1	74	1	1	Yes, History of Synchronous/Bilateral Malignancy	1	1	0	3	2	Stage 2	2	WITH TUMOR	1	NO	0	R0	0
6.8444	1	61	1	1	No	0	0	0	2	2	Stage 1	1	TUMOR FREE	0	NO	0	R0	0
6.8558	1	60	1	2	No	0	1	1	2a	1	Stage 2	2	TUMOR FREE	0	NO	0	R0	0
6.8673	1	69	1	1	No	0	0	0	1b	2	Stage 1	1			NO	0
6.8724	1	54	0	2	No	0	0	0	2	1	Stage 1	1	TUMOR FREE	0	NO	0	R0	0
6.8728	1	74	1	2	No	0	1	0	1	4	Stage 1	1			NO	0	R0	0
6.8751	1	63	1	2	No	0	0	0	4	1	Stage 3	3	TUMOR FREE	0			R0	0
6.8768	1	60	1	2	No	0	1	3	1a	2	Stage 3	3	WITH TUMOR	1	YES	1	R0	0
6.8799	1	67	1	2	No	0	0	1	2	2	Stage 2	2	WITH TUMOR	1	NO	0	R0	0
6.8872	1		0	2	Yes	1	0	1	2	2	Stage 2	2	WITH TUMOR	1	NO	0	R0	0
6.891	1	71	1	1	No	0	0	0	2	2	Stage 1	1	TUMOR FREE	0			R0	0
6.8958	1	58	0	1	No	0	1	0	2a	1	Stage 1	1	WITH TUMOR	1	NO	0	R0	0
6.8973	1	69	1	2	No	0	0	0	1	3	Stage 1	1	TUMOR FREE	0	NO	0	R0	0
6.9017	1	80	1	2	No	0	0	0	3	4	Stage 2	2	WITH TUMOR	1	NO	0	R0	0
6.9037	1	72	1	1	No	0	0	2	4	2	Stage 3	3	TUMOR FREE	0	YES	1
6.9044	1	54	0	2	No	0	0	0	2a	1	Stage 1	1	TUMOR FREE	0	NO	0
6.9048	1	80	1	2	No	0	0	0	1b	1	Stage 1	1	TUMOR FREE	0	NO	0	R0	0
6.9077	1	64	1	1	No	0	0	0	1b	2	Stage 1	1	TUMOR FREE	0	NO	0	R0	0
6.9236	1	57	0	2	Yes	1	1	NX	2	3	Stage 4	4	TUMOR FREE	0	NO	0	R2	2
6.9261	1	58	0	2	No	0	0	0	3	2	Stage 2	2			NO	0	R0	0
6.9341	1	58	0	1	No	0	0	0	2a	1	Stage 1	1	TUMOR FREE	0	NO	0	R0	0
6.942	1	63	1	2	Yes, History of Prior Malignancy	1	0	1	1b	3	Stage 2	2	TUMOR FREE	0	NO	0	R0	0
6.9441	1	70	1	1	No	0	0	0	3	4	Stage 2	2	WITH TUMOR	1	NO	0	R0	0
6.9476	1	56	0	1	No	0	1	0	4	1	[Discrepancy]	[Discrepancy]			NO	0
6.9635	1	49	0	2	No	0	0	2	1	2	Stage 3	3	WITH TUMOR	1	YES	1	R0	0
6.9647	1	63	1	2	No	0	0	1	2	2	Stage 2	2	WITH TUMOR	1	NO	0	R0	0
6.9664	1	69	1	1	No	0	1	1	2	2	Stage 2	2	TUMOR FREE	0	NO	0	R0	0
6.9801	1	67	1	1	Yes	1	0	0	2	4	Stage 1	1	WITH TUMOR	1			R0	0
6.9886	1	67	1	2	Yes	1	1	1	4	3	Stage 4	4					R2	2
6.9913	1	56	0	1	No	0	0	0	3	1	Stage 2	2	WITH TUMOR	1	NO	0	R0	0
6.9951	1	64	1	1	No	0	0	0	1b	4	Stage 1	1	TUMOR FREE	0	NO	0	R0	0
6.9985	1	76	1	1	Yes	1	0	1	4	1	Stage 3	3					R0	0
6.9998	1	69	1	2	Yes, History of Prior Malignancy	1	0	0	1b	2	Stage 1	1	TUMOR FREE	0	NO	0	R0	0
7.0008	2	66	1	1	No	0	1	0	2	2	Stage 4	4	WITH TUMOR	1	NO	0	R0	0
7.0032	2	58	0	2	No	0	1	0	2	1	Stage 1	1	TUMOR FREE	0	NO	0	R0	0
7.0038	2	74	1	2	No	0	1	0	1	2	Stage 1	1	WITH TUMOR	1	NO	0
7.0051	2	58	0	1	No	0	0	0	2a	1	Stage 1	1	TUMOR FREE	0	NO	0
7.0112	2	81	1	2	No	0	0	0	1	2	Stage 1	1	TUMOR FREE	0	NO	0	R0	0
7.0169	2	55	0	2	No	0	0	0	2a	2	Stage 1	1	TUMOR FREE	0	NO	0
7.0241	2	64	1	1	No	0	1	0	2	2	Stage 1	1	TUMOR FREE	0	NO	0	R0	0
7.0356	2	52	0	1	No	0	0	1	2a	1	Stage 2	2	WITH TUMOR	1	NO	0	R0	0
7.0436	2	72	1	2	Yes	1	1	0	1b	2	Stage 1	1	TUMOR FREE	0	NO	0	R0	0
7.0486	2	54	0	2	No	0	1	2	2a	2	Stage 3	3	WITH TUMOR	1	YES	1
7.0535	2	75	1	2	No	0	1	0	2	2	Stage 4	4			NO	0	R0	0
7.0542	2	65	1	1	Yes	1	0	0	2	2	Stage 1	1	WITH TUMOR	1	NO	0	R0	0
7.0554	2	59	0	1	No	0	1	1	2b	2	Stage 2	2	[Discrepancy]	[Discrepancy]	NO	0
7.0707	2	81	1	2	No	0	0	0	2a	2	Stage 1	1	TUMOR FREE	0	NO	0	R0	0
7.0893	2	65	1	2	No	0	0	1	2	2	Stage 2	2	WITH TUMOR	1	NO	0	R0	0
7.0902	2	76	1	2	Yes	1	1	0	2a	1	Stage 1	1	TUMOR FREE	0	NO	0	R0	0
7.092	2	48	0	2	No	0	0	0	1	1	Stage I	1	TUMOR FREE	0	NO	0	R0	0
7.0927	2	63	1	2	Yes	1	1	0	1a	3	Stage 1	1	WITH TUMOR	1
7.0946	2	68	1	1	Yes	1	0	0	3	2	Stage 2	2	WITH TUMOR	1	NO	0	R0	0
7.113	2	76	1	2	No	0	0	0	2	2	Stage 1	1	TUMOR FREE	0	NO	0	R0	0
7.1134	2	56	0	2	No	0	1	1	2	2	Stage 2	2	WITH TUMOR	1	NO	0	R0	0
7.116	2	63	1	1	No	0	1	2	2a	2	Stage 4	4	TUMOR FREE	0	YES	1	R0	0
7.129	2	77	1	1	No	0	1	1	2a	2	Stage 2	2	WITH TUMOR	1	NO	0	R0	0
7.1324	2	70	1	1	No	0	0	0	2	4	Stage 1	1	WITH TUMOR	1	YES	1
7.1345	2	61	1	1	No	0	1	2	4	2	Stage 4	4			NO	0	R0	0
7.1362	2	78	1	2	No	0	1	2	2a	2	Stage 3	3	TUMOR FREE	0	NO	0
7.1429	2	69	1	1	No	0	0	0	2b	2	Stage 2	2	TUMOR FREE	0	NO	0	R0	0
7.1444	2		0	2	No	0	0	0	2a	1	Stage 1	1	WITH TUMOR	1	NO	0	R0	0
7.1479	2	64	1	1	No	0	1	0	1b	1	Stage 1	1	TUMOR FREE	0	NO	0	R0	0
7.1504	2	62	1	2	No	0	0	0	1	1	Stage 1	1	TUMOR FREE	0	NO	0
7.1553	2	57	0	1	Yes, History of Prior Malignancy	1	1	0	1	2	Stage 1	1	TUMOR FREE	0	NO	0	R0	0
7.1555	2	85	1	1	No	0	0	0	2	2	Stage 1	1	TUMOR FREE	0	NO	0
7.1565	2	67	1	1	No	0	0	0	2	3	Stage 1	1	TUMOR FREE	0	NO	0	R0	0
7.1609	2	52	0	1	No	0	0	2	3	2	Stage 3	3	TUMOR FREE	0			R0	0
7.1626	2	74	1	2	Yes, History of Prior Malignancy	1	0	2	2b	2	Stage 3	3	WITH TUMOR	1	YES	1	RX	3
7.1636	2	68	1	1	Yes	1	0	0	2	1	Stage 1	1	TUMOR FREE	0	YES	1	R0	0
7.168	2	63	1	2	No	0	1	1	1	2	Stage 2	2	TUMOR FREE	0	NO	0	R0	0
7.1691	2	71	1	1	Yes, History of Prior Malignancy	1	0	1	2a	3	Stage 2	2	TUMOR FREE	0	NO	0	RX	3
7.1723	2	54	0	2	No	0	1	0	3	2	Stage 2	2	WITH TUMOR	1	NO	0
7.1749	2	79	1	1	No	0	0	1	2a	1	Stage 2	2	TUMOR FREE	0	NO	0	R0	0
7.1773	2	58	0	2	No	0	0	2	1	2	Stage 3	3	TUMOR FREE	0	NO	0	R0	0
7.1797	2	82	1	1	No	0	0	0	2	2	Stage 1	1	TUMOR FREE	0			R0	0
7.1856	2	67	1	1	No	0	0	0	2	2	Stage 1	1			NO	0	R0	0
7.1858	2	77	1	1	Yes, History of Prior Malignancy	1	1	0	2a	2	Stage 1	1	TUMOR FREE	0	NO	0	RX	3
7.1874	2		0	1	No	0	0	2	2	1	Stage 3	3			NO	0	R0	0
7.1949	2	71	1	2	No	0	0	0	1	3	Stage 1	1	WITH TUMOR	1	NO	0	R0	0
7.1965	2	46	0	2	No	0	1	0	3	2	Stage 2	2	TUMOR FREE	0			R0	0
7.1966	2	60	1	2	No	0	0	0	2	1	Stage 1	1	WITH TUMOR	1	YES	1	R0	0
7.1986	2	60	1	2	No	0	0	0	1	1	Stage 1	1	WITH TUMOR	1	NO	0	R0	0
7.2012	2	60	1	2	No	0	0	NX	1	1	Stage 1	1			NO	0	R0	0
7.2038	2	75	1	1	No	0	0	0	1b	3	Stage 1	1	TUMOR FREE	0	NO	0
7.2056	2	75	1	1	No	0	1	0	3	1	Stage 2	2	WITH TUMOR	1	NO	0	R0	0
7.2068	2	52	0	2	No	0	0	0	1b	2	Stage 1	1	TUMOR FREE	0	NO	0
7.2112	2	68	1	1	No	0	0	0	2	2	Stage 1	1					R0	0
7.2175	2		0	1	No	0	0	0	2	2	Stage 1	1	TUMOR FREE	0	NO	0	R0	0
7.2184	2	59	0	2	No	0	0	0	2	3	Stage 1	1	TUMOR FREE	0			R0	0
7.2264	2	69	1	1	Yes	1	0	2	3	2	Stage 3	3					R0	0
7.2272	2		0	1	Yes	1	0	0	2	2	Stage 1	1	TUMOR FREE	0	NO	0	R0	0
7.2272	2	57	0	1	No	0	0	0	2a	1	Stage 1	1	TUMOR FREE	0	NO	0	R0	0
7.2335	2	50	0	2	No	0	0	0	1	1	Stage 1	1	TUMOR FREE	0	NO	0
7.2407	2	61	1	1	No	0	0	0	1a	2	Stage 1	1	TUMOR FREE	0	NO	0	R0	0
7.2426	2	72	1	2	No	0	1	0	2a	2	Stage 1	1	WITH TUMOR	1	NO	0	RX	3
7.248	2	68	1	2	No	0	0	0	2	3	Stage 1	1	TUMOR FREE	0	NO	0	R0	0
7.2504	2	73	1	1	No	0	0	0	3	3	Stage 2	2	TUMOR FREE	0	NO	0
7.2526	2	73	1	1	Yes, History of Prior Malignancy	1	0	0	3	2	Stage 2	2	TUMOR FREE	0	NO	0
7.2563	2	51	0	2	No	0	0	0	2	2	Stage 1	1	TUMOR FREE	0	NO	0	R0	0
7.2567	2	87	1	2	Yes, History of Prior Malignancy	1	1	0	2a	1	Stage 1	1	TUMOR FREE	0	NO	0	R0	0
7.2568	2	73	1	2	No	0	0	0	1b	2	Stage 1	1	WITH TUMOR	1	NO	0	R0	0
7.262	2	72	1	1	No	0	0	0	2	2	Stage 1	1	TUMOR FREE	0	NO	0	R0	0
7.2628	2	56	0	1	Yes, History of Prior Malignancy	1	0	1	2a	1	Stage 2	2	TUMOR FREE	0	NO	0	R0	0
7.2682	2	68	1	2	Yes	1	1	2	1	1	Stage 3	3	TUMOR FREE	0	NO	0	R0	0
7.2754	2		0	2	No	0	0	0	1	2	Stage 1	1	TUMOR FREE	0	NO	0	R0	0
7.2786	2	54	0	2	No	0	1	2	2	2	Stage 3	3	WITH TUMOR	1	YES	1	RX	3
7.2798	2	68	1	2	No	0	0	1	2	1	Stage 2	2	TUMOR FREE	0	YES	1	R1	1
7.2853	2	59	0	1	No	0	1	0	1	3	Stage 1	1	TUMOR FREE	0	NO	0
7.2925	2	60	1	2	No	0	0	0	3	1	Stage 2	2	TUMOR FREE	0	NO	0
7.2953	2	52	0	2	No	0	0	0	1b	2	Stage 1	1	WITH TUMOR	1	YES	1	R0	0
7.2962	2		0	2	No	0	0	0	2	2	Stage 1	1	WITH TUMOR	1	NO	0	R0	0
7.3042	2	71	1	2	No	0	1	0	2a	2	Stage 1	1
7.3069	2	66	1	2	No	0	0	1	2	2	Stage 2	2	WITH TUMOR	1	NO	0	R0	0
7.311	2	66	1	2	No	0	0	0	2	3	Stage 1	1	TUMOR FREE	0	NO	0	R0	0
7.3124	2	76	1	2	No	0	1	2	3	2	Stage 3	3	WITH TUMOR	1	NO	0
7.3133	2	63	1	1	No	0	1	1	2a	2	Stage 2	2	TUMOR FREE	0	YES	1	RX	3
7.3152	2	55	0	2	No	0	0	0	2	2	Stage 1	1	TUMOR FREE	0	NO	0	R0	0
7.3238	2	51	0	1	No	0	1	0	2b	1	Stage 4	4	WITH TUMOR	1	YES	1	R0	0
7.3245	2	88	1	1	Yes, History of Synchronous/Bilateral Malignancy	1	1	0	1b	2	Stage 1	1	WITH TUMOR	1	NO	0	R0	0
7.3251	2	59	0	1	No	0	0	0	2	2	Stage 1	1	TUMOR FREE	0	NO	0
7.3274	2	79	1	2	No	0	0	1	2	1	Stage 2	2	WITH TUMOR	1	NO	0
7.337	2	73	1	1	No	0	0	0	1b	1	Stage 1	1	TUMOR FREE	0	NO	0
7.3445	2	70	1	1	No	0	1	2	1a	2	Stage 3	3	TUMOR FREE	0	NO	0	R0	0
7.3517	2	71	1	1	No	0	0	1	2	2	Stage 2	2			NO	0	R0	0
7.3565	2	59	0	2	Yes	1	0	1	2	3	Stage 2	2	WITH TUMOR	1	NO	0
7.3641	2	77	1	1	No	0	0	2	3	2	Stage 3	3	WITH TUMOR	1			R0	0
7.3649	2	55	0	2	No	0	0	2	2a	1	Stage 3	3	TUMOR FREE	0	NO	0
7.374	2	39	0	2	No	0	1	0	1a	2	Stage 1	1	WITH TUMOR	1	YES	1	R0	0
7.3747	2		0	1	No	0	0	0	2	1	Stage 1	1	WITH TUMOR	1	NO	0	R0	0
7.3785	2	74	1	2	Yes	1	0	0	1	2	Stage 1	1	TUMOR FREE	0	NO	0
7.3977	2	68	1	1	Yes, History of Prior Malignancy	1	0	2	2	4	Stage 3	3			NO	0	R0	0
7.4	2	72	1	2	No	0	0	1	4	1	Stage 3	3	WITH TUMOR	1	YES	1
7.4009	2	53	0	2	No	0	0	2	1	3	Stage 3	3	TUMOR FREE	0	YES	1	R0	0
7.412	2	67	1	1	No	0	1	2	3	2	Stage 3	3	WITH TUMOR	1	NO	0	R0	0
7.4155	2		0	2	No	0	0	0	2	2	Stage 1	1	TUMOR FREE	0	NO	0	R0	0
7.4221	2	58	0	2	No	0	0	0	2b	2	Stage 2	2	WITH TUMOR	1	NO	0	R0	0
7.4234	2	70	1	1	No	0	1	2	2	2	Stage 4	4	TUMOR FREE	0			RX	3
7.43	2	45	0	1	No	0	0	1	2a	2	Stage 2	2	WITH TUMOR	1	YES	1	R0	0
7.4404	2	63	1	1	No	0	1	0	2	2	Stage 1	1	TUMOR FREE	0	NO	0	R0	0
7.4492	2	73	1	2	No	0	1	0	2	2	Stage 1	1	TUMOR FREE	0	NO	0	R0	0
7.4558	2	68	1	1	No	0	0	1	2b	1	Stage 2	2	WITH TUMOR	1	YES	1	R0	0
7.4565	2	70	1	1	No	0	0	0	1	2	Stage 1	1	TUMOR FREE	0	NO	0	R0	0
7.4617	2	60	1	1	Yes, History of Prior Malignancy	1	0	1	2a	3	Stage 2	2	TUMOR FREE	0	NO	0	R0	0
7.477	2	72	1	1	No	0	0	2	3	4	Stage 3	3					R0	0
7.4782	2	65	1	2	No	0	0	2	4	2	Stage 3	3	TUMOR FREE	0	NO	0	R0	0
7.4797	2	67	1	2	No	0	1	2	2	3	Stage 3	3	WITH TUMOR	1	YES	1	R1	1
7.481	2	72	1	2	No	0	0	2	3	1	Stage 3	3	TUMOR FREE	0	NO	0	R0	0
7.4813	2	63	1	1	No	0	0	0	1a	1	Stage 1	1	TUMOR FREE	0	NO	0	R0	0
7.4847	2	56	0	2	No	0	0	2	1	2	Stage 3	3	TUMOR FREE	0	YES	1
7.4862	2	72	1	1	No	0	0	1	2a	3	Stage 2	2	WITH TUMOR	1			R0	0
7.491	2		0	2	No	0	0	2	3	2	Stage 3	3	WITH TUMOR	1	NO	0	R2	2
7.4942	2	64	1	2	No	0	1	0	2a	2	Stage 1	1	TUMOR FREE	0	YES	1	R0	0
7.4968	2	59	0	1	Yes, History of Synchronous/Bilateral Malignancy	1	1	0	2b	4	Stage 2	2
7.4984	2	52	0	2	No	0	1	1	4	1	Stage 4	4	WITH TUMOR	1	NO	0	R1	1
7.4984	2	69	1	2	No	0	0	0	1b	2	Stage 1	1	TUMOR FREE	0	NO	0	RX	3
7.5057	2	76	1	1	No	0	1	0	2a	2	Stage 1	1	TUMOR FREE	0	NO	0	R0	0
7.5117	2	75	1	1	Yes	1	0	1	2	4	Stage 2	2	WITH TUMOR	1	NO	0
7.5146	2	76	1	1	No	0	0	2	4	2	Stage 3	3	TUMOR FREE	0			R0	0
7.5174	2	54	0	1	No	0	1	0	2	2	Stage 1	1	TUMOR FREE	0	NO	0	R0	0
7.5274	2	82	1	1	Yes	1	0	2	2a	1	Stage 3	3	TUMOR FREE	0	NO	0
7.5286	2	67	1	1	Yes	1	0	0	1a	2	Stage 1	1	TUMOR FREE	0	NO	0	R0	0
7.5331	2	64	1	1	No	0	0	1	2b	2	Stage 2	2	TUMOR FREE	0	NO	0	R0	0
7.5365	2	67	1	1	Yes	1	0	2	2	1	Stage 3	3	WITH TUMOR	1			R0	0
7.5373	2	61	1	2	No	0	1	0	1b	1	Stage 1	1	WITH TUMOR	1	NO	0	R0	0
7.5377	2	70	1	2	No	0	0	0	1b	2	Stage I	1	TUMOR FREE	0	NO	0
7.5387	2	70	1	1	Yes	1	0	1	2a	2	Stage 2	2	WITH TUMOR	1	NO	0	R0	0
7.5456	2	72	1	1	No	0	0	0	2	2	Stage 1	1	TUMOR FREE	0	NO	0	R0	0
7.5462	2	71	1	1	No	0	1	0	2a	2	Stage 4	4	WITH TUMOR	1	NO	0	RX	3
7.5565	2	67	1	1	No	0	0	1	2a	1	Stage 2	2			NO	0
7.5598	2	70	1	2	No	0	1	0	1a	2	Stage 1	1	TUMOR FREE	0	NO	0	R0	0
7.5617	2	74	1	2	No	0	0	2	2	2	Stage 3	3	TUMOR FREE	0	NO	0	R0	0
7.5908	2	73	1	2	Yes, History of Prior Malignancy	1	1	0	2a	1	Stage 1	1	WITH TUMOR	1	NO	0	R0	0
7.5922	2	77	1	1	Yes, History of Prior Malignancy	1	0	2	1	3	Stage 3	3	TUMOR FREE	0	NO	0	R0	0
7.5962	2	81	1	1	No	0	1	0	3	2	Stage 2	2	TUMOR FREE	0	NO	0	R0	0
7.606	2	65	1	1	Yes	1	0	0	2	1	Stage 1	1	TUMOR FREE	0	NO	0	R0	0
7.6075	2	65	1	2	No	0	0	0	1	1	Stage 1	1	TUMOR FREE	0	NO	0	R0	0
7.6129	2	60	1	1	No	0	1	1	1a	1	Stage 4	4	WITH TUMOR	1	YES	1	R0	0
7.6151	2	81	1	2	Yes, History of Prior Malignancy	1	1	0	1b	4	Stage 1	1	TUMOR FREE	0	NO	0	R0	0
7.6193	2	71	1	1	No	0	0	0	4	2	Stage 3	3	WITH TUMOR	1	NO	0	R0	0
7.6217	2	51	0	1	No	0	1	2	2	1	Stage 3	3	WITH TUMOR	1	YES	1	R0	0
7.6257	2	38	0	1	No	0	0	0	1	2	Stage 1	1	TUMOR FREE	0			R0	0
7.6268	2	72	1	1	No	0	1	0	2	2	Stage 1	1	WITH TUMOR	1	NO	0
7.6268	2	69	1	1	Yes, History of Prior Malignancy	1	0	1	2	2	Stage 2	2	WITH TUMOR	1	YES	1	R0	0
7.6273	2	66	1	2	No	0	0	2	2b	2	Stage 3	3	WITH TUMOR	1	NO	0
7.6317	2	52	0	1	No	0	0	0	2	2	Stage 1	1	TUMOR FREE	0
7.633	2	54	0	1	No	0	0	0	2a	1	Stage 1	1	TUMOR FREE	0	NO	0	R0	0
7.6365	2	75	1	2	Yes, History of Prior Malignancy	1	0	0	1	4	Stage 1	1	WITH TUMOR	1	NO	0	R0	0
7.638	2	47	0	2	No	0	0	3	4	1	Stage 3	3	TUMOR FREE	0	NO	0	R0	0
7.6382	2	72	1	1	No	0	0	0	1a	1	Stage 1	1	TUMOR FREE	0	NO	0
7.6391	2	53	0	1	No	0	1	0	1a	2	Stage 1	1	TUMOR FREE	0	NO	0	R0	0
7.6398	2	77	1	2	Yes	1	0	2	2	2	Stage 3	3			NO	0	R0	0
7.6522	2		0	1	No	0	0	0	2	2	Stage 1	1	TUMOR FREE	0	NO	0	R0	0
7.6562	2	70	1	1	No	0	0	0	2b	2	Stage 2	2	TUMOR FREE	0	NO	0	R0	0
7.6672	2	66	1	1	No	0	0	2	2	2	Stage 3	3	WITH TUMOR	1	NO	0	R0	0
7.668	2	41	0	2	No	0	1	0	2	3	Stage I	1	TUMOR FREE	0	NO	0	R0	0
7.6738	2	40	0	2	No	0	1	2	3	1	Stage 4	4	WITH TUMOR	1	NO	0	R1	1
7.6797	2	77	1	2	No	0	0	0	1	1	Stage 1	1	TUMOR FREE	0			R0	0
7.6964	2	59	0	1	No	0	0	1	1	1	Stage 2	2	TUMOR FREE	0	NO	0	R0	0
7.6969	2	57	0	1	No	0	0	1	1b	1	Stage 2	2	TUMOR FREE	0	YES	1	R0	0
7.6986	2	69	1	2	No	0	0	0	1b	2	Stage 1	1	TUMOR FREE	0	NO	0	RX	3
7.7024	2	61	1	1	No	0	0	1	2	2	Stage 2	2	WITH TUMOR	1	NO	0
7.7198	2	62	1	1	No	0	0	0	2a	2	Stage 1	1	TUMOR FREE	0	YES	1	RX	3
7.7221	2	53	0	2	No	0	0	0	2	2	Stage 1	1			NO	0	R0	0
7.7273	2	58	0	1	No	0	0	2	2	2	Stage 3	3	WITH TUMOR	1	NO	0
7.7323	2	53	0	2	No	0	0	2	2	1	Stage 3	3	WITH TUMOR	1	YES	1	R0	0
7.7367	2	73	1	2	No	0	0	0	1b	2	Stage 1	1	TUMOR FREE	0	NO	0	R0	0
7.7483	2	69	1	2	Yes	1	0	0	2a	2	Stage 1	1	WITH TUMOR	1	NO	0
7.7521	2	65	1	2	Yes	1	0	1	2	2	Stage 2	2	TUMOR FREE	0	NO	0	R0	0
7.7544	2	68	1	2	No	0	0	1	2	2	Stage 2	2			NO	0	R0	0
7.7567	2	81	1	1	Yes	1	1	0	2b	2	Stage 2	2	WITH TUMOR	1	NO	0
7.7567	2	61	1	1	No	0	0	1	2b	3	Stage 2	2	TUMOR FREE	0	NO	0
7.7618	2	70	1	1	No	0	0	0	3	2	Stage 2	2	WITH TUMOR	1	YES	1	R1	1
7.7653	2	61	1	1	No	0	1	0	2a	2	Stage 1	1	TUMOR FREE	0	NO	0
7.7665	2	50	0	2	No	0	0	0	2b	2	Stage 2	2	WITH TUMOR	1	NO	0	R0	0
7.7685	2	51	0	1	No	0	0	0	2	2	Stage 1	1	WITH TUMOR	1			R0	0
7.7687	2	78	1	1	No	0	1	0	2	2	Stage 1	1	TUMOR FREE	0	NO	0	R0	0
7.772	2	75	1	2	No	0	0	0	2	1	Stage 1	1	WITH TUMOR	1	NO	0	R0	0
7.7737	2	58	0	1	No	0	0	1	1a	TX	[Discrepancy]	[Discrepancy]	TUMOR FREE	0	NO	0	R0	0
7.7755	2	74	1	2	No	0	1	NX	TX	3	Stage 4	4	WITH TUMOR	1	YES	1	R0	0
7.7827	2	63	1	1	No	0	0	1	3	1	Stage 3	3	TUMOR FREE	0	YES	1	R0	0
7.7899	2	62	1	1	No	0	1	2	1a	3	Stage 3	3	TUMOR FREE	0	NO	0	R0	0
7.792	2	73	1	2	No	0	0	1	3	2	Stage 3	3	WITH TUMOR	1	YES	1	R0	0
7.7939	2	53	0	1	No	0	0	2	2b	1	Stage 3	3	TUMOR FREE	0
7.7963	2	69	1	1	No	0	0	0	1	2	Stage 1	1	TUMOR FREE	0			R0	0
7.8124	2	56	0	1	No	0	0	0	2	2	Stage 1	1					R0	0
7.8196	2	58	0	2	No	0	0	0	2	2	Stage 1	1	TUMOR FREE	0	NO	0	R0	0
7.8235	2	50	0	2	No	0	1	1	2	1	Stage 2	2	WITH TUMOR	1	NO	0
7.8282	2	62	1	1	No	0	1	0	1	2	Stage 1	1	WITH TUMOR	1	NO	0
7.8557	2	62	1	2	Yes, History of Prior Malignancy	1	0	1	2a	2	Stage 2	2	TUMOR FREE	0	NO	0	R0	0
7.8589	2	62	1	2	No	0	1	0	2	2	Stage 1	1	WITH TUMOR	1	YES	1
7.8629	2	55	0	1	No	0	0	2	2	2	Stage 3	3	TUMOR FREE	0	NO	0	R0	0
7.8801	2	42	0	1	No	0	1	1	2	2	Stage 4	4	WITH TUMOR	1	NO	0	R0	0
7.8932	2		0	2	No	0	0	2	2	1	Stage 3	3	WITH TUMOR	1	NO	0	R0	0
7.8933	2	61	1	2	No	0	1	0	1b	1	Stage 1	1	WITH TUMOR	1	NO	0	R0	0
7.9271	2	56	0	1	No	0	0	0	1a	2	Stage 1	1	TUMOR FREE	0	NO	0	R0	0
7.9372	2		0	1	No	0	0	1	2	2	Stage 2	2	WITH TUMOR	1	NO	0	R0	0
7.9452	2	69	1	2	No	0	1	0	2	3	Stage 4	4	WITH TUMOR	1	NO	0	R0	0
7.954	2	79	1	2	No	0	0	2	3	3	Stage 3	3	WITH TUMOR	1	NO	0
7.9606	2	41	0	1	No	0	0	0	3	2	Stage 2	2	WITH TUMOR	1	YES	1	R0	0
7.9702	2	71	1	2	No	0	0	0	2	2	Stage 1	1	WITH TUMOR	1	YES	1
7.9822	2	59	0	1	No	0	0	1	2	2	Stage 2	2	WITH TUMOR	1	NO	0	R0	0
7.9863	2	73	1	2	No	0	0	2	2	1	Stage 3	3	WITH TUMOR	1	NO	0	R0	0
7.9894	2	72	1	2	No	0	0	0	1	2	Stage 1	1	WITH TUMOR	1	YES	1	R0	0
8.0254	2	41	0	1	No	0	0	0	2	1	Stage 1	1	TUMOR FREE	0	NO	0	R0	0
8.0381	2	76	1	2	No	0	1	0	1b	2	Stage 1	1			NO	0
8.0484	2	66	1	2	No	0	0	0	2a	1	Stage 1	1					R0	0
8.0517	2	47	0	2	Yes	1	0	1	1b	1	Stage 2	2	TUMOR FREE	0	NO	0
8.0537	2	59	0	1	No	0	1	1	1b	2	Stage 2	2	WITH TUMOR	1
8.0562	2	65	1	2	No	0	0	0	2	2	Stage 1	1	WITH TUMOR	1	NO	0	R0	0
8.1022	2	66	1	1	No	0	0	1	2	2	Stage 2	2	TUMOR FREE	0	NO	0	R0	0
8.1118	2	54	0	2	No	0	0	0	2a	2	Stage 1	1	TUMOR FREE	0			R0	0
8.1385	2	74	1	2	No	0	0	2	2	1	Stage 3	3	WITH TUMOR	1	YES	1
8.1402	2	52	0	2	No	0	1	0	1	2	Stage 4	4	TUMOR FREE	0	YES	1	R0	0
8.1441	2	42	0	2	No	0	0	0	2a	3	Stage 1	1	TUMOR FREE	0	NO	0
8.1478	2	79	1	2	No	0	0	1	3	1	Stage 3	3					R2	2
8.2611	2	59	0	2	No	0	0	0	1	2	Stage 1	1	TUMOR FREE	0	NO	0	R0	0
8.2669	2	66	1	1	No	0	1	0	2	2	Stage 1	1	TUMOR FREE	0	NO	0
8.2735	2	69	1	1	No	0	0	1	2a	1	Stage 2	2	TUMOR FREE	0	NO	0	R0	0
8.2772	2	71	1	1	No	0	0	0	1a	2	Stage 1	1	TUMOR FREE	0	NO	0	R0	0
8.287	2		0	1	No	0	0	0	2	2	Stage 1	1	TUMOR FREE	0	NO	0	R0	0
8.323	2	61	1	1	No	0	0	2	2	2	Stage 3	3	TUMOR FREE	0	YES	1	R0	0
8.3603	2	72	1	2	No	0	0	0	2	2	Stage 1	1	TUMOR FREE	0	NO	0
8.3667	2	72	1	2	Yes	1	0	0	2	1	Stage 1	1	WITH TUMOR	1	NO	0	R0	0
8.3826	2	51	0	2	No	0	1	0	1	2	Stage 1	1	WITH TUMOR	1	NO	0	R0	0
8.4057	2	76	1	2	Yes, History of Prior Malignancy	1	0	0	2b	2	Stage 2	2	WITH TUMOR	1	NO	0	R0	0
8.4087	2	55	0	1	No	0	0	1	2	2	Stage 2	2	TUMOR FREE	0	NO	0	R0	0
8.4152	2	68	1	1	No	0	0	2	2	2	Stage 3	3	TUMOR FREE	0			R0	0
8.421	2	71	1	2	No	0	0	2	2	2	Stage 3	3			NO	0	R0	0
8.4228	2	48	0	1	No	0	0	0	2b	3	Stage 2	2	TUMOR FREE	0	NO	0	R0	0
8.4297	2	61	1	1	No	0	1	0	3	1	Stage 2	2	WITH TUMOR	1	NO	0	R0	0
8.4498	2	62	1	1	No	0	1	0	1	2	Stage 1	1	WITH TUMOR	1	NO	0
8.5098	2	40	0	2	No	0	1	0	2	2	Stage 4	4	WITH TUMOR	1	NO	0	R0	0
8.5201	2	60	1	1	No	0	0	0	2	2	Stage 1	1	TUMOR FREE	0	NO	0	R0	0
8.5296	2	61	1	1	No	0	0	1	2b	2	Stage 2	2	TUMOR FREE	0	NO	0	R0	0
8.5377	2	52	0	2	Yes	1	1	0	2	1	Stage 1	1	TUMOR FREE	0	NO	0
8.5532	2	81	1	2	No	0	1	2	1	1	Stage 3	3	TUMOR FREE	0	NO	0
8.5708	2	61	1	1	No	0	1	0	1	1	Stage 4	4	WITH TUMOR	1	YES	1
8.5755	2	60	1	1	No	0	1	0	1a	4	Stage 1	1	TUMOR FREE	0	NO	0	R0	0
8.5803	2	57	0	1	No	0	0	2	4	2	Stage 3	3	WITH TUMOR	1	NO	0	R0	0
8.5932	2	69	1	1	No	0	0	2	2	2	Stage 3	3	WITH TUMOR	1	YES	1	R0	0
8.599	2	59	0	1	No	0	1	2	2	2	Stage 3	3	TUMOR FREE	0	NO	0
8.6273	2	63	1	2	No	0	1	0	2	2	Stage 4	4	WITH TUMOR	1	NO	0
8.6321	2	74	1	1	No	0	0	2	2	2	Stage 3	3	WITH TUMOR	1	YES	1
8.6678	2	70	1	1	No	0	0	1	2a	2	Stage 2	2	WITH TUMOR	1	NO	0	R0	0
8.6879	2	70	1	2	No	0	0	0	2b	2	[Discrepancy]	[Discrepancy]	TUMOR FREE	0	NO	0	R0	0
8.7776	2	65	1	1	No	0	0	1	2	2	Stage 2	2					R0	0
8.8035	2	62	1	1	No	0	0	2	2	2	Stage 3	3	TUMOR FREE	0	NO	0	R0	0
8.8334	2	44	0	1	No	0	0	0	2a	1	Stage 1	1	TUMOR FREE	0	NO	0	R0	0
8.8389	2	71	1	1	No	0	0	0	1a	2	Stage 1	1			NO	0
9.024	2	75	1	2	Yes	1	0	0	2	2	Stage 1	1	WITH TUMOR	1	NO	0	R1	1
9.0954	2	68	1	1	No	0	0	0	2	3	Stage 1	1					R0	0
9.4417	2	49	0	2	No	0	1	0	3	Stage 2	2	2	0	NO	0
