# Supplementary material for: Prognostic and immune infiltrative biomarkers of CENPO in pan–cancer and its relationship with lung adenocarcinoma cell proliferation and metastasis
Source: BMC Cancer. 2023 Aug 9;23:735. doi: 10.1186/s12885-023-11233-2 (PMC10410993; doi:10.1186/s12885-023-11233-2)
Supplement: Supplementary file 8 — Additional file 8. [file 12885_2023_11233_MOESM8_ESM.xlsx]

## Sheet: Sheet1
UCSC_Xena	Group	Type	Number	Download Links (gene expression RNAseq - HTSeq - FPKM)										Download Links (somatic mutation (SNPs and small INDELs) - VarScan2 Variant Aggregation and Masking)										Download Links (DNA methylation - Illumina Human Methylation 450)
UCSC_Xena-GDC-TCGA	ACC	Tumor	77	https://xenabrowser.net/datapages/?dataset=TCGA-ACC.htseq_fpkm.tsv&host=https%3A%2F%2Fgdc.xenahubs.net&removeHub=https%3A%2F%2Fxena.treehouse.gi.ucsc.edu%3A443										https://xenabrowser.net/datapages/?dataset=TCGA-ACC.varscan2_snv.tsv&host=https%3A%2F%2Fgdc.xenahubs.net&removeHub=https%3A%2F%2Fxena.treehouse.gi.ucsc.edu%3A443										https://xenabrowser.net/datapages/?dataset=TCGA-ACC.methylation450.tsv&host=https%3A%2F%2Fgdc.xenahubs.net&removeHub=https%3A%2F%2Fxena.treehouse.gi.ucsc.edu%3A443
	BLCA	Normal	19	https://xenabrowser.net/datapages/?dataset=TCGA-BLCA.htseq_fpkm.tsv&host=https%3A%2F%2Fgdc.xenahubs.net&removeHub=https%3A%2F%2Fxena.treehouse.gi.ucsc.edu%3A443										https://xenabrowser.net/datapages/?dataset=TCGA-BLCA.varscan2_snv.tsv&host=https%3A%2F%2Fgdc.xenahubs.net&removeHub=https%3A%2F%2Fxena.treehouse.gi.ucsc.edu%3A443										https://xenabrowser.net/datapages/?dataset=TCGA-BLCA.methylation450.tsv&host=https%3A%2F%2Fgdc.xenahubs.net&removeHub=https%3A%2F%2Fxena.treehouse.gi.ucsc.edu%3A443
		Tumor	411
	BRCA	Normal	99	https://xenabrowser.net/datapages/?dataset=TCGA-BRCA.htseq_fpkm.tsv&host=https%3A%2F%2Fgdc.xenahubs.net&removeHub=https%3A%2F%2Fxena.treehouse.gi.ucsc.edu%3A443										https://xenabrowser.net/datapages/?dataset=TCGA-BRCA.varscan2_snv.tsv&host=https%3A%2F%2Fgdc.xenahubs.net&removeHub=https%3A%2F%2Fxena.treehouse.gi.ucsc.edu%3A443										https://xenabrowser.net/datapages/?dataset=TCGA-BRCA.methylation450.tsv&host=https%3A%2F%2Fgdc.xenahubs.net&removeHub=https%3A%2F%2Fxena.treehouse.gi.ucsc.edu%3A443
		Tumor	1118
	CESC	Normal	3	https://xenabrowser.net/datapages/?dataset=TCGA-CESC.htseq_fpkm.tsv&host=https%3A%2F%2Fgdc.xenahubs.net&removeHub=https%3A%2F%2Fxena.treehouse.gi.ucsc.edu%3A443										https://xenabrowser.net/datapages/?dataset=TCGA-CESC.varscan2_snv.tsv&host=https%3A%2F%2Fgdc.xenahubs.net&removeHub=https%3A%2F%2Fxena.treehouse.gi.ucsc.edu%3A443										https://xenabrowser.net/datapages/?dataset=TCGA-CESC.methylation450.tsv&host=https%3A%2F%2Fgdc.xenahubs.net&removeHub=https%3A%2F%2Fxena.treehouse.gi.ucsc.edu%3A443
		Tumor	306
	CHOL	Normal	9	https://xenabrowser.net/datapages/?dataset=TCGA-CHOL.htseq_fpkm.tsv&host=https%3A%2F%2Fgdc.xenahubs.net&removeHub=https%3A%2F%2Fxena.treehouse.gi.ucsc.edu%3A443										https://xenabrowser.net/datapages/?dataset=TCGA-CHOL.varscan2_snv.tsv&host=https%3A%2F%2Fgdc.xenahubs.net&removeHub=https%3A%2F%2Fxena.treehouse.gi.ucsc.edu%3A443										https://xenabrowser.net/datapages/?dataset=TCGA-CHOL.methylation450.tsv&host=https%3A%2F%2Fgdc.xenahubs.net&removeHub=https%3A%2F%2Fxena.treehouse.gi.ucsc.edu%3A443
		Tumor	36
	COAD	Normal	41	https://xenabrowser.net/datapages/?dataset=TCGA-COAD.htseq_fpkm.tsv&host=https%3A%2F%2Fgdc.xenahubs.net&removeHub=https%3A%2F%2Fxena.treehouse.gi.ucsc.edu%3A443										https://xenabrowser.net/datapages/?dataset=TCGA-COAD.varscan2_snv.tsv&host=https%3A%2F%2Fgdc.xenahubs.net&removeHub=https%3A%2F%2Fxena.treehouse.gi.ucsc.edu%3A443										https://xenabrowser.net/datapages/?dataset=TCGA-COAD.methylation450.tsv&host=https%3A%2F%2Fgdc.xenahubs.net&removeHub=https%3A%2F%2Fxena.treehouse.gi.ucsc.edu%3A443
		Tumor	471
	DLBC	Tumor	48	https://xenabrowser.net/datapages/?dataset=TCGA-DLBC.htseq_fpkm.tsv&host=https%3A%2F%2Fgdc.xenahubs.net&removeHub=https%3A%2F%2Fxena.treehouse.gi.ucsc.edu%3A443										https://xenabrowser.net/datapages/?dataset=TCGA-DLBC.varscan2_snv.tsv&host=https%3A%2F%2Fgdc.xenahubs.net&removeHub=https%3A%2F%2Fxena.treehouse.gi.ucsc.edu%3A443										https://xenabrowser.net/datapages/?dataset=TCGA-DLBC.methylation450.tsv&host=https%3A%2F%2Fgdc.xenahubs.net&removeHub=https%3A%2F%2Fxena.treehouse.gi.ucsc.edu%3A443
	ESCA	Normal	11	https://xenabrowser.net/datapages/?dataset=TCGA-ESCA.htseq_fpkm.tsv&host=https%3A%2F%2Fgdc.xenahubs.net&removeHub=https%3A%2F%2Fxena.treehouse.gi.ucsc.edu%3A443										https://xenabrowser.net/datapages/?dataset=TCGA-ESCA.varscan2_snv.tsv&host=https%3A%2F%2Fgdc.xenahubs.net&removeHub=https%3A%2F%2Fxena.treehouse.gi.ucsc.edu%3A443										https://xenabrowser.net/datapages/?dataset=TCGA-ESCA.methylation450.tsv&host=https%3A%2F%2Fgdc.xenahubs.net&removeHub=https%3A%2F%2Fxena.treehouse.gi.ucsc.edu%3A443
		Tumor	162
	GBM	Normal	5	https://xenabrowser.net/datapages/?dataset=TCGA-GBM.htseq_fpkm.tsv&host=https%3A%2F%2Fgdc.xenahubs.net&removeHub=https%3A%2F%2Fxena.treehouse.gi.ucsc.edu%3A443										https://xenabrowser.net/datapages/?dataset=TCGA-GBM.varscan2_snv.tsv&host=https%3A%2F%2Fgdc.xenahubs.net&removeHub=https%3A%2F%2Fxena.treehouse.gi.ucsc.edu%3A443										https://xenabrowser.net/datapages/?dataset=TCGA-GBM.methylation450.tsv&host=https%3A%2F%2Fgdc.xenahubs.net&removeHub=https%3A%2F%2Fxena.treehouse.gi.ucsc.edu%3A443
		Tumor	168
	HNSC	Normal	44	https://xenabrowser.net/datapages/?dataset=TCGA-HNSC.htseq_fpkm.tsv&host=https%3A%2F%2Fgdc.xenahubs.net&removeHub=https%3A%2F%2Fxena.treehouse.gi.ucsc.edu%3A443										https://xenabrowser.net/datapages/?dataset=TCGA-HNSC.varscan2_snv.tsv&host=https%3A%2F%2Fgdc.xenahubs.net&removeHub=https%3A%2F%2Fxena.treehouse.gi.ucsc.edu%3A443										https://xenabrowser.net/datapages/?dataset=TCGA-HNSC.methylation450.tsv&host=https%3A%2F%2Fgdc.xenahubs.net&removeHub=https%3A%2F%2Fxena.treehouse.gi.ucsc.edu%3A443
		Tumor	502
	KICH	Normal	24	https://xenabrowser.net/datapages/?dataset=TCGA-KICH.htseq_fpkm.tsv&host=https%3A%2F%2Fgdc.xenahubs.net&removeHub=https%3A%2F%2Fxena.treehouse.gi.ucsc.edu%3A443										https://xenabrowser.net/datapages/?dataset=TCGA-KICH.varscan2_snv.tsv&host=https%3A%2F%2Fgdc.xenahubs.net&removeHub=https%3A%2F%2Fxena.treehouse.gi.ucsc.edu%3A443										https://xenabrowser.net/datapages/?dataset=TCGA-KICH.methylation450.tsv&host=https%3A%2F%2Fgdc.xenahubs.net&removeHub=https%3A%2F%2Fxena.treehouse.gi.ucsc.edu%3A443
		Tumor	65
	KIRC	Normal	72	https://xenabrowser.net/datapages/?dataset=TCGA-KIRC.htseq_fpkm.tsv&host=https%3A%2F%2Fgdc.xenahubs.net&removeHub=https%3A%2F%2Fxena.treehouse.gi.ucsc.edu%3A443										https://xenabrowser.net/datapages/?dataset=TCGA-KIRC.varscan2_snv.tsv&host=https%3A%2F%2Fgdc.xenahubs.net&removeHub=https%3A%2F%2Fxena.treehouse.gi.ucsc.edu%3A443										https://xenabrowser.net/datapages/?dataset=TCGA-KIRC.methylation450.tsv&host=https%3A%2F%2Fgdc.xenahubs.net&removeHub=https%3A%2F%2Fxena.treehouse.gi.ucsc.edu%3A443
		Tumor	535
	KIRP	Normal	32	https://xenabrowser.net/datapages/?dataset=TCGA-KIRP.htseq_fpkm.tsv&host=https%3A%2F%2Fgdc.xenahubs.net&removeHub=https%3A%2F%2Fxena.treehouse.gi.ucsc.edu%3A443										https://xenabrowser.net/datapages/?dataset=TCGA-KIRP.varscan2_snv.tsv&host=https%3A%2F%2Fgdc.xenahubs.net&removeHub=https%3A%2F%2Fxena.treehouse.gi.ucsc.edu%3A443										https://xenabrowser.net/datapages/?dataset=TCGA-KIRP.methylation450.tsv&host=https%3A%2F%2Fgdc.xenahubs.net&removeHub=https%3A%2F%2Fxena.treehouse.gi.ucsc.edu%3A443
		Tumor	289
	LAML	Tumor	151	https://xenabrowser.net/datapages/?dataset=TCGA-LAML.htseq_fpkm.tsv&host=https%3A%2F%2Fgdc.xenahubs.net&removeHub=https%3A%2F%2Fxena.treehouse.gi.ucsc.edu%3A443										https://xenabrowser.net/datapages/?dataset=TCGA-LAML.varscan2_snv.tsv&host=https%3A%2F%2Fgdc.xenahubs.net&removeHub=https%3A%2F%2Fxena.treehouse.gi.ucsc.edu%3A443										https://xenabrowser.net/datapages/?dataset=TCGA-LAML.methylation450.tsv&host=https%3A%2F%2Fgdc.xenahubs.net&removeHub=https%3A%2F%2Fxena.treehouse.gi.ucsc.edu%3A443
	LGG	Tumor	529	https://xenabrowser.net/datapages/?dataset=TCGA-LGG.htseq_fpkm.tsv&host=https%3A%2F%2Fgdc.xenahubs.net&removeHub=https%3A%2F%2Fxena.treehouse.gi.ucsc.edu%3A443										https://xenabrowser.net/datapages/?dataset=TCGA-LGG.varscan2_snv.tsv&host=https%3A%2F%2Fgdc.xenahubs.net&removeHub=https%3A%2F%2Fxena.treehouse.gi.ucsc.edu%3A443										https://xenabrowser.net/datapages/?dataset=TCGA-LGG.methylation450.tsv&host=https%3A%2F%2Fgdc.xenahubs.net&removeHub=https%3A%2F%2Fxena.treehouse.gi.ucsc.edu%3A443
	LIHC	Normal	50	https://xenabrowser.net/datapages/?dataset=TCGA-LIHC.htseq_fpkm.tsv&host=https%3A%2F%2Fgdc.xenahubs.net&removeHub=https%3A%2F%2Fxena.treehouse.gi.ucsc.edu%3A443										https://xenabrowser.net/datapages/?dataset=TCGA-LIHC.varscan2_snv.tsv&host=https%3A%2F%2Fgdc.xenahubs.net&removeHub=https%3A%2F%2Fxena.treehouse.gi.ucsc.edu%3A443										https://xenabrowser.net/datapages/?dataset=TCGA-LIHC.methylation450.tsv&host=https%3A%2F%2Fgdc.xenahubs.net&removeHub=https%3A%2F%2Fxena.treehouse.gi.ucsc.edu%3A443
		Tumor	374
	LUAD	Normal	59	https://xenabrowser.net/datapages/?dataset=TCGA-LUAD.htseq_fpkm.tsv&host=https%3A%2F%2Fgdc.xenahubs.net&removeHub=https%3A%2F%2Fxena.treehouse.gi.ucsc.edu%3A443										https://xenabrowser.net/datapages/?dataset=TCGA-LUAD.varscan2_snv.tsv&host=https%3A%2F%2Fgdc.xenahubs.net&removeHub=https%3A%2F%2Fxena.treehouse.gi.ucsc.edu%3A443										https://xenabrowser.net/datapages/?dataset=TCGA-LUAD.methylation450.tsv&host=https%3A%2F%2Fgdc.xenahubs.net&removeHub=https%3A%2F%2Fxena.treehouse.gi.ucsc.edu%3A443
		Tumor	526
	LUSC	Normal	49	https://xenabrowser.net/datapages/?dataset=TCGA-LUSC.htseq_fpkm.tsv&host=https%3A%2F%2Fgdc.xenahubs.net&removeHub=https%3A%2F%2Fxena.treehouse.gi.ucsc.edu%3A443										https://xenabrowser.net/datapages/?dataset=TCGA-LUSC.varscan2_snv.tsv&host=https%3A%2F%2Fgdc.xenahubs.net&removeHub=https%3A%2F%2Fxena.treehouse.gi.ucsc.edu%3A443										https://xenabrowser.net/datapages/?dataset=TCGA-LUSC.methylation450.tsv&host=https%3A%2F%2Fgdc.xenahubs.net&removeHub=https%3A%2F%2Fxena.treehouse.gi.ucsc.edu%3A443
		Tumor	501
	MESO	Tumor	86	https://xenabrowser.net/datapages/?dataset=TCGA-MESO.htseq_fpkm.tsv&host=https%3A%2F%2Fgdc.xenahubs.net&removeHub=https%3A%2F%2Fxena.treehouse.gi.ucsc.edu%3A443										https://xenabrowser.net/datapages/?dataset=TCGA-MESO.varscan2_snv.tsv&host=https%3A%2F%2Fgdc.xenahubs.net&removeHub=https%3A%2F%2Fxena.treehouse.gi.ucsc.edu%3A443										https://xenabrowser.net/datapages/?dataset=TCGA-MESO.methylation450.tsv&host=https%3A%2F%2Fgdc.xenahubs.net&removeHub=https%3A%2F%2Fxena.treehouse.gi.ucsc.edu%3A443
	OV	Tumor	379	https://xenabrowser.net/datapages/?dataset=TCGA-OV.htseq_fpkm.tsv&host=https%3A%2F%2Fgdc.xenahubs.net&removeHub=https%3A%2F%2Fxena.treehouse.gi.ucsc.edu%3A443										https://xenabrowser.net/datapages/?dataset=TCGA-OV.varscan2_snv.tsv&host=https%3A%2F%2Fgdc.xenahubs.net&removeHub=https%3A%2F%2Fxena.treehouse.gi.ucsc.edu%3A443										https://xenabrowser.net/datapages/?dataset=TCGA-OV.methylation450.tsv&host=https%3A%2F%2Fgdc.xenahubs.net&removeHub=https%3A%2F%2Fxena.treehouse.gi.ucsc.edu%3A443
	PAAD	Normal	4	https://xenabrowser.net/datapages/?dataset=TCGA-PAAD.htseq_fpkm.tsv&host=https%3A%2F%2Fgdc.xenahubs.net&removeHub=https%3A%2F%2Fxena.treehouse.gi.ucsc.edu%3A443										https://xenabrowser.net/datapages/?dataset=TCGA-PAAD.varscan2_snv.tsv&host=https%3A%2F%2Fgdc.xenahubs.net&removeHub=https%3A%2F%2Fxena.treehouse.gi.ucsc.edu%3A443										https://xenabrowser.net/datapages/?dataset=TCGA-PAAD.methylation450.tsv&host=https%3A%2F%2Fgdc.xenahubs.net&removeHub=https%3A%2F%2Fxena.treehouse.gi.ucsc.edu%3A443
		Tumor	178
	PCPG	Normal	3	https://xenabrowser.net/datapages/?dataset=TCGA-PCPG.htseq_fpkm.tsv&host=https%3A%2F%2Fgdc.xenahubs.net&removeHub=https%3A%2F%2Fxena.treehouse.gi.ucsc.edu%3A443										https://xenabrowser.net/datapages/?dataset=TCGA-PCPG.varscan2_snv.tsv&host=https%3A%2F%2Fgdc.xenahubs.net&removeHub=https%3A%2F%2Fxena.treehouse.gi.ucsc.edu%3A443										https://xenabrowser.net/datapages/?dataset=TCGA-PCPG.methylation450.tsv&host=https%3A%2F%2Fgdc.xenahubs.net&removeHub=https%3A%2F%2Fxena.treehouse.gi.ucsc.edu%3A443
		Tumor	183
	PRAD	Normal	52	https://xenabrowser.net/datapages/?dataset=TCGA-PRAD.htseq_fpkm.tsv&host=https%3A%2F%2Fgdc.xenahubs.net&removeHub=https%3A%2F%2Fxena.treehouse.gi.ucsc.edu%3A443										https://xenabrowser.net/datapages/?dataset=TCGA-PRAD.varscan2_snv.tsv&host=https%3A%2F%2Fgdc.xenahubs.net&removeHub=https%3A%2F%2Fxena.treehouse.gi.ucsc.edu%3A443										https://xenabrowser.net/datapages/?dataset=TCGA-PRAD.methylation450.tsv&host=https%3A%2F%2Fgdc.xenahubs.net&removeHub=https%3A%2F%2Fxena.treehouse.gi.ucsc.edu%3A443
		Tumor	499
	READ	Normal	10	https://xenabrowser.net/datapages/?dataset=TCGA-READ.htseq_fpkm.tsv&host=https%3A%2F%2Fgdc.xenahubs.net&removeHub=https%3A%2F%2Fxena.treehouse.gi.ucsc.edu%3A443										https://xenabrowser.net/datapages/?dataset=TCGA-READ.varscan2_snv.tsv&host=https%3A%2F%2Fgdc.xenahubs.net&removeHub=https%3A%2F%2Fxena.treehouse.gi.ucsc.edu%3A443										https://xenabrowser.net/datapages/?dataset=TCGA-READ.methylation450.tsv&host=https%3A%2F%2Fgdc.xenahubs.net&removeHub=https%3A%2F%2Fxena.treehouse.gi.ucsc.edu%3A443
		Tumor	167
	SARC	Normal	2	https://xenabrowser.net/datapages/?dataset=TCGA-SARC.htseq_fpkm.tsv&host=https%3A%2F%2Fgdc.xenahubs.net&removeHub=https%3A%2F%2Fxena.treehouse.gi.ucsc.edu%3A443										https://xenabrowser.net/datapages/?dataset=TCGA-SARC.varscan2_snv.tsv&host=https%3A%2F%2Fgdc.xenahubs.net&removeHub=https%3A%2F%2Fxena.treehouse.gi.ucsc.edu%3A443										https://xenabrowser.net/datapages/?dataset=TCGA-SARC.methylation450.tsv&host=https%3A%2F%2Fgdc.xenahubs.net&removeHub=https%3A%2F%2Fxena.treehouse.gi.ucsc.edu%3A443
		Tumor	263
	SKCM	Normal	1	https://xenabrowser.net/datapages/?dataset=TCGA-SKCM.htseq_fpkm.tsv&host=https%3A%2F%2Fgdc.xenahubs.net&removeHub=https%3A%2F%2Fxena.treehouse.gi.ucsc.edu%3A443										https://xenabrowser.net/datapages/?dataset=TCGA-SKCM.varscan2_snv.tsv&host=https%3A%2F%2Fgdc.xenahubs.net&removeHub=https%3A%2F%2Fxena.treehouse.gi.ucsc.edu%3A443										https://xenabrowser.net/datapages/?dataset=TCGA-SKCM.methylation450.tsv&host=https%3A%2F%2Fgdc.xenahubs.net&removeHub=https%3A%2F%2Fxena.treehouse.gi.ucsc.edu%3A443
		Tumor	472
	STAD	Normal	32	https://xenabrowser.net/datapages/?dataset=TCGA-STAD.htseq_fpkm.tsv&host=https%3A%2F%2Fgdc.xenahubs.net&removeHub=https%3A%2F%2Fxena.treehouse.gi.ucsc.edu%3A443										https://xenabrowser.net/datapages/?dataset=TCGA-STAD.varscan2_snv.tsv&host=https%3A%2F%2Fgdc.xenahubs.net&removeHub=https%3A%2F%2Fxena.treehouse.gi.ucsc.edu%3A443										https://xenabrowser.net/datapages/?dataset=TCGA-STAD.methylation450.tsv&host=https%3A%2F%2Fgdc.xenahubs.net&removeHub=https%3A%2F%2Fxena.treehouse.gi.ucsc.edu%3A443
		Tumor	375
	TGCT	Tumor	156	https://xenabrowser.net/datapages/?dataset=TCGA-TGCT.htseq_fpkm.tsv&host=https%3A%2F%2Fgdc.xenahubs.net&removeHub=https%3A%2F%2Fxena.treehouse.gi.ucsc.edu%3A443										https://xenabrowser.net/datapages/?dataset=TCGA-TGCT.varscan2_snv.tsv&host=https%3A%2F%2Fgdc.xenahubs.net&removeHub=https%3A%2F%2Fxena.treehouse.gi.ucsc.edu%3A443										https://xenabrowser.net/datapages/?dataset=TCGA-TGCT.methylation450.tsv&host=https%3A%2F%2Fgdc.xenahubs.net&removeHub=https%3A%2F%2Fxena.treehouse.gi.ucsc.edu%3A443
	THCA	Normal	58	https://xenabrowser.net/datapages/?dataset=TCGA-THCA.htseq_fpkm.tsv&host=https%3A%2F%2Fgdc.xenahubs.net&removeHub=https%3A%2F%2Fxena.treehouse.gi.ucsc.edu%3A443										https://xenabrowser.net/datapages/?dataset=TCGA-THCA.varscan2_snv.tsv&host=https%3A%2F%2Fgdc.xenahubs.net&removeHub=https%3A%2F%2Fxena.treehouse.gi.ucsc.edu%3A443										https://xenabrowser.net/datapages/?dataset=TCGA-THCA.methylation450.tsv&host=https%3A%2F%2Fgdc.xenahubs.net&removeHub=https%3A%2F%2Fxena.treehouse.gi.ucsc.edu%3A443
		Tumor	510
	THYM	Normal	2	https://xenabrowser.net/datapages/?dataset=TCGA-THYM.htseq_fpkm.tsv&host=https%3A%2F%2Fgdc.xenahubs.net&removeHub=https%3A%2F%2Fxena.treehouse.gi.ucsc.edu%3A443										https://xenabrowser.net/datapages/?dataset=TCGA-THYM.varscan2_snv.tsv&host=https%3A%2F%2Fgdc.xenahubs.net&removeHub=https%3A%2F%2Fxena.treehouse.gi.ucsc.edu%3A443										https://xenabrowser.net/datapages/?dataset=TCGA-THYM.methylation450.tsv&host=https%3A%2F%2Fgdc.xenahubs.net&removeHub=https%3A%2F%2Fxena.treehouse.gi.ucsc.edu%3A443
		Tumor	119
	UCEC	Normal	35	https://xenabrowser.net/datapages/?dataset=TCGA-UCEC.htseq_fpkm.tsv&host=https%3A%2F%2Fgdc.xenahubs.net&removeHub=https%3A%2F%2Fxena.treehouse.gi.ucsc.edu%3A443										https://xenabrowser.net/datapages/?dataset=TCGA-UCEC.varscan2_snv.tsv&host=https%3A%2F%2Fgdc.xenahubs.net&removeHub=https%3A%2F%2Fxena.treehouse.gi.ucsc.edu%3A443										https://xenabrowser.net/datapages/?dataset=TCGA-UCEC.methylation450.tsv&host=https%3A%2F%2Fgdc.xenahubs.net&removeHub=https%3A%2F%2Fxena.treehouse.gi.ucsc.edu%3A443
		Tumor	538
	UCS	Tumor	56	https://xenabrowser.net/datapages/?dataset=TCGA-UCS.htseq_fpkm.tsv&host=https%3A%2F%2Fgdc.xenahubs.net&removeHub=https%3A%2F%2Fxena.treehouse.gi.ucsc.edu%3A443										https://xenabrowser.net/datapages/?dataset=TCGA-UCS.varscan2_snv.tsv&host=https%3A%2F%2Fgdc.xenahubs.net&removeHub=https%3A%2F%2Fxena.treehouse.gi.ucsc.edu%3A443										https://xenabrowser.net/datapages/?dataset=TCGA-UCS.methylation450.tsv&host=https%3A%2F%2Fgdc.xenahubs.net&removeHub=https%3A%2F%2Fxena.treehouse.gi.ucsc.edu%3A443
	UVM	Tumor	80	https://xenabrowser.net/datapages/?dataset=TCGA-UVM.htseq_fpkm.tsv&host=https%3A%2F%2Fgdc.xenahubs.net&removeHub=https%3A%2F%2Fxena.treehouse.gi.ucsc.edu%3A443										https://xenabrowser.net/datapages/?dataset=TCGA-UVM.varscan2_snv.tsv&host=https%3A%2F%2Fgdc.xenahubs.net&removeHub=https%3A%2F%2Fxena.treehouse.gi.ucsc.edu%3A443										https://xenabrowser.net/datapages/?dataset=TCGA-UVM.methylation450.tsv&host=https%3A%2F%2Fgdc.xenahubs.net&removeHub=https%3A%2F%2Fxena.treehouse.gi.ucsc.edu%3A443
UCSC_Xena-TCGA	LUAD	Normal	59	https://tcga-xena-hub.s3.us-east-1.amazonaws.com/download/TCGA.LUAD.sampleMap%2FHiSeqV2.gz; Full metadata
		Tumor	517
TCGA Pan-Cancer	Download link(TCGA Pan-Cancer (PANCAN)- Curated clinical data)
	https://xenabrowser.net/datapages/?dataset=Survival_SupplementalTable_S1_20171025_xena_sp&host=https%3A%2F%2Fpancanatlas.xenahubs.net&removeHub=https%3A%2F%2Fxena.treehouse.gi.ucsc.edu%3A443
