# Supplementary material for: Prognostic and immune infiltrative biomarkers of CENPO in pan–cancer and its relationship with lung adenocarcinoma cell proliferation and metastasis
Source: BMC Cancer. 2023 Aug 9;23:735. doi: 10.1186/s12885-023-11233-2 (PMC10410993; doi:10.1186/s12885-023-11233-2)
Supplement: Supplementary file 10 — Additional file 10. [file 12885_2023_11233_MOESM10_ESM.xlsx]

## Sheet: Sheet1
ID	CENPO	Type
TCGA-50-5931-11	5.647	Normal
TCGA-49-4512-11	6.1621	Normal
TCGA-49-6743-11	5.981	Normal
TCGA-44-6148-11	6.0978	Normal
TCGA-50-5939-11	5.7037	Normal
TCGA-55-6984-11	6.1524	Normal
TCGA-44-2657-11	6.5533	Normal
TCGA-55-6986-11	5.6539	Normal
TCGA-91-6835-11	6.052	Normal
TCGA-55-6975-11	6.1463	Normal
TCGA-91-6849-11	5.5887	Normal
TCGA-55-6983-11	6.0819	Normal
TCGA-55-6978-11	5.201	Normal
TCGA-44-5645-11	5.7276	Normal
TCGA-55-6981-11	6.2209	Normal
TCGA-50-5935-11	6.4784	Normal
TCGA-44-3396-11	6.0654	Normal
TCGA-55-6968-11	6.2362	Normal
TCGA-49-6745-11	6.1434	Normal
TCGA-50-5936-11	5.6996	Normal
TCGA-91-6836-11	5.959	Normal
TCGA-44-2655-11	6.3999	Normal
TCGA-55-6980-11	5.8827	Normal
TCGA-44-6146-11	5.9704	Normal
TCGA-38-4626-11	5.7102	Normal
TCGA-38-4627-11	6.3368	Normal
TCGA-50-6595-11	6.0389	Normal
TCGA-50-5930-11	5.5129	Normal
TCGA-55-6985-11	5.6056	Normal
TCGA-55-6972-11	5.3691	Normal
TCGA-73-4676-11	5.7292	Normal
TCGA-44-3398-11	6.3263	Normal
TCGA-91-6831-11	4.7885	Normal
TCGA-55-6971-11	5.6474	Normal
TCGA-44-2661-11	6.1844	Normal
TCGA-55-6969-11	6.3875	Normal
TCGA-55-6970-11	6.2509	Normal
TCGA-50-5933-11	5.2604	Normal
TCGA-91-6829-11	6.3139	Normal
TCGA-44-6778-11	5.777	Normal
TCGA-38-4625-11	5.6336	Normal
TCGA-49-6761-11	6.3308	Normal
TCGA-91-6847-11	6.3805	Normal
TCGA-44-6145-11	6.0612	Normal
TCGA-91-6828-11	5.5477	Normal
TCGA-44-6144-11	5.6009	Normal
TCGA-38-4632-11	6.2797	Normal
TCGA-55-6979-11	5.3635	Normal
TCGA-44-6147-11	5.9479	Normal
TCGA-49-4490-11	5.9526	Normal
TCGA-44-2665-11	6.1652	Normal
TCGA-50-5932-11	5.6911	Normal
TCGA-44-2662-11	5.8297	Normal
TCGA-44-2668-11	6.4555	Normal
TCGA-49-6744-11	6.351	Normal
TCGA-49-6742-11	6.8752	Normal
TCGA-55-6982-11	6.2562	Normal
TCGA-44-6777-11	6.1454	Normal
TCGA-44-6776-11	5.9108	Normal
TCGA-69-7978-01	7.0554	Tumor
TCGA-62-8399-01	8.8035	Tumor
TCGA-78-7539-01	6.4609	Tumor
TCGA-73-4658-01	6.3513	Tumor
TCGA-44-6775-01	7.2426	Tumor
TCGA-44-2655-01	6.5916	Tumor
TCGA-44-3398-01	6.2698	Tumor
TCGA-62-8397-01	5.7355	Tumor
TCGA-53-A4EZ-01	7.3133	Tumor
TCGA-50-7109-01	6.5232	Tumor
TCGA-38-6178-01	5.4871	Tumor
TCGA-86-8056-01	6.8751	Tumor
TCGA-55-1592-01	7.0542	Tumor
TCGA-86-A4JF-01	6.9913	Tumor
TCGA-69-7974-01	7.0486	Tumor
TCGA-86-A456-01	5.552	Tumor
TCGA-97-8547-01	7.1362	Tumor
TCGA-55-1595-01	7.3785	Tumor
TCGA-NJ-A4YP-01	6.6045	Tumor
TCGA-05-4424-01	7.7618	Tumor
TCGA-97-A4M7-01	6.2419	Tumor
TCGA-44-2668-01	7.7685	Tumor
TCGA-NJ-A55A-01	6.046	Tumor
TCGA-05-5420-01	7.5365	Tumor
TCGA-55-1594-01	8.4152	Tumor
TCGA-44-2659-01	6.0849	Tumor
TCGA-78-7162-01	6.3413	Tumor
TCGA-38-4632-01	7.8801	Tumor
TCGA-49-6761-01	7.2682	Tumor
TCGA-91-6828-01	6.7517	Tumor
TCGA-05-4418-01	7.2264	Tumor
TCGA-99-AA5R-01	5.8831	Tumor
TCGA-55-7903-01	7.1479	Tumor
TCGA-55-A492-01	6.0345	Tumor
TCGA-55-8616-01	6.605	Tumor
TCGA-86-7954-01	7.248	Tumor
TCGA-05-4433-01	7.1797	Tumor
TCGA-69-8253-01	6.2552	Tumor
TCGA-86-8674-01	6.1511	Tumor
TCGA-69-7765-01	6.9476	Tumor
TCGA-86-8672-01	6.7431	Tumor
TCGA-MP-A4T6-01	6.2277	Tumor
TCGA-97-7547-01	6.3677	Tumor
TCGA-55-7911-01	7.5598	Tumor
TCGA-91-6835-01	7.0112	Tumor
TCGA-55-A48Z-01	6.8768	Tumor
TCGA-50-5045-01	6.6795	Tumor
TCGA-55-7913-01	7.8933	Tumor
TCGA-86-8075-01	7.311	Tumor
TCGA-97-8177-01	6.1629	Tumor
TCGA-55-7907-01	7.129	Tumor
TCGA-44-8117-01	6.9044	Tumor
TCGA-86-8668-01	6.2942	Tumor
TCGA-78-8660-01	7.6268	Tumor
TCGA-05-4415-01	8.5803	Tumor
TCGA-75-6212-01	5.8083	Tumor
TCGA-67-6215-01	6.4545	Tumor
TCGA-05-4430-01	7.2184	Tumor
TCGA-49-6742-01	7.5387	Tumor
TCGA-38-4627-01	6.6451	Tumor
TCGA-69-7979-01	7.3042	Tumor
TCGA-69-7973-01	8.1441	Tumor
TCGA-73-7499-01	7.0707	Tumor
TCGA-44-A47A-01	6.3432	Tumor
TCGA-78-8662-01	7.7221	Tumor
TCGA-55-8085-01	6.9077	Tumor
TCGA-75-6206-01	7.2175	Tumor
TCGA-50-5932-01	7.5117	Tumor
TCGA-50-6594-01	7.954	Tumor
TCGA-49-AARQ-01	7.668	Tumor
TCGA-55-7574-01	6.4353	Tumor
TCGA-50-5066-01	7.5456	Tumor
TCGA-86-A4P7-01	6.2283	Tumor
TCGA-64-5779-01	8.323	Tumor
TCGA-55-8096-01	6.4798	Tumor
TCGA-97-8175-01	7.0169	Tumor
TCGA-44-A4SS-01	7.337	Tumor
TCGA-91-7771-01	6.5035	Tumor
TCGA-86-8278-01	6.9647	Tumor
TCGA-55-8087-01	6.4408	Tumor
TCGA-MP-A4T8-01	7.3977	Tumor
TCGA-L9-A5IP-01	7.6738	Tumor
TCGA-55-6979-01	7.3565	Tumor
TCGA-69-7980-01	7.5377	Tumor
TCGA-62-A472-01	6.9441	Tumor
TCGA-49-4507-01	7.792	Tumor
TCGA-55-6642-01	7.4404	Tumor
TCGA-86-7701-01	7.0008	Tumor
TCGA-62-A46R-01	6.8724	Tumor
TCGA-62-A46V-01	5.9167	Tumor
TCGA-44-6146-01	6.3026	Tumor
TCGA-49-4501-01	6.2664	Tumor
TCGA-55-7914-01	6.7717	Tumor
TCGA-73-4659-01	7.6672	Tumor
TCGA-86-8669-01	6.9951	Tumor
TCGA-49-AAQV-01	7.168	Tumor
TCGA-78-7149-01	5.5151	Tumor
TCGA-86-8055-01	7.1749	Tumor
TCGA-91-6829-01	7.7687	Tumor
TCGA-78-7163-01	4.8961	Tumor
TCGA-62-8398-01	7.8629	Tumor
TCGA-38-A44F-01	5.5026	Tumor
TCGA-38-4631-01	8.3667	Tumor
TCGA-L9-A7SV-01	8.2735	Tumor
TCGA-49-AAR2-01	7.0241	Tumor
TCGA-MP-A4SY-01	6.5016	Tumor
TCGA-05-4432-01	8.1022	Tumor
TCGA-05-4398-01	7.638	Tumor
TCGA-75-6211-01	7.2962	Tumor
TCGA-44-6778-01	7.2853	Tumor
TCGA-55-8510-01	6.7858	Tumor
TCGA-50-5946-02	7.8282	Tumor
TCGA-MP-A4TD-01	6.7518	Tumor
TCGA-55-8205-01	8.4057	Tumor
TCGA-55-7573-01	6.0748	Tumor
TCGA-MP-A4T4-01	7.7544	Tumor
TCGA-97-7941-01	6.2181	Tumor
TCGA-55-7994-01	7.5962	Tumor
TCGA-05-4420-01	8.0254	Tumor
TCGA-50-6591-01	8.6273	Tumor
TCGA-38-4630-01	9.024	Tumor
TCGA-49-6743-01	8.5532	Tumor
TCGA-55-8206-01	6.6811	Tumor
TCGA-MP-A5C7-01	7.113	Tumor
TCGA-49-AARE-01	8.3826	Tumor
TCGA-75-6203-01	6.334	Tumor
TCGA-86-7955-01	7.7198	Tumor
TCGA-49-6744-01	5.6912	Tumor
TCGA-95-A4VN-01	7.8557	Tumor
TCGA-55-7576-01	7.633	Tumor
TCGA-53-7626-01	6.7515	Tumor
TCGA-97-7546-01	6.7863	Tumor
TCGA-44-7672-01	7.2068	Tumor
TCGA-62-A46O-01	8.0562	Tumor
TCGA-55-6984-01	6.1719	Tumor
TCGA-97-8174-01	6.4144	Tumor
TCGA-35-4123-01	7.6257	Tumor
TCGA-93-A4JO-01	6.7542	Tumor
TCGA-97-7937-01	6.6978	Tumor
TCGA-50-6597-01	6.7178	Tumor
TCGA-99-8033-01	7.7755	Tumor
TCGA-55-7570-01	8.5755	Tumor
TCGA-38-4626-01	6.7048	Tumor
TCGA-69-7764-01	7.2038	Tumor
TCGA-05-5715-01	6.6282	Tumor
TCGA-50-6590-01	8.3603	Tumor
TCGA-86-7713-01	7.6562	Tumor
TCGA-S2-AA1A-01	5.8194	Tumor
TCGA-75-7027-01	8.287	Tumor
TCGA-50-5049-01	7.1324	Tumor
TCGA-55-8505-01	7.7899	Tumor
TCGA-49-AAR0-01	7.1553	Tumor
TCGA-MP-A4T9-01	7.2786	Tumor
TCGA-95-7567-01	7.7567	Tumor
TCGA-05-4422-01	7.2112	Tumor
TCGA-86-8673-01	6.8444	Tumor
TCGA-55-6543-01	6.2597	Tumor
TCGA-NJ-A7XG-01	5.8566	Tumor
TCGA-86-8280-01	6.398	Tumor
TCGA-99-8028-01	6.3921	Tumor
TCGA-55-7725-01	5.6775	Tumor
TCGA-64-5778-01	6.8113	Tumor
TCGA-86-8671-01	6.5679	Tumor
TCGA-05-4403-01	6.2656	Tumor
TCGA-69-7763-01	6.8673	Tumor
TCGA-49-4506-01	7.2798	Tumor
TCGA-97-A4M1-01	5.1294	Tumor
TCGA-86-8359-01	7.1609	Tumor
TCGA-05-4405-01	6.4549	Tumor
TCGA-62-A470-01	6.264	Tumor
TCGA-49-4487-01	7.9894	Tumor
TCGA-44-6145-01	7.1504	Tumor
TCGA-91-8499-01	8.0381	Tumor
TCGA-95-8494-01	7.5565	Tumor
TCGA-64-1681-01	6.3898	Tumor
TCGA-55-A491-01	7.6151	Tumor
TCGA-75-6214-01	7.8932	Tumor
TCGA-86-6851-01	6.7439	Tumor
TCGA-80-5607-01	6.8872	Tumor
TCGA-91-6849-01	5.0867	Tumor
TCGA-62-8402-01	7.9863	Tumor
TCGA-78-7156-01	5.8777	Tumor
TCGA-50-5941-01	7.3649	Tumor
TCGA-62-A46Y-01	6.5639	Tumor
TCGA-44-7660-01	7.6268	Tumor
TCGA-MP-A4TF-01	7.4221	Tumor
TCGA-05-4402-01	6.9236	Tumor
TCGA-62-A471-01	7.5331	Tumor
TCGA-55-8513-01	6.0515	Tumor
TCGA-05-4397-01	8.7776	Tumor
TCGA-05-5429-01	6.813	Tumor
TCGA-78-7167-01	6.4904	Tumor
TCGA-50-8459-01	6.5345	Tumor
TCGA-93-8067-01	7.1858	Tumor
TCGA-44-6776-01	6.3059	Tumor
TCGA-75-7031-01	6.4615	Tumor
TCGA-44-7667-01	9.4417	Tumor
TCGA-35-3615-01	6.6435	Tumor
TCGA-86-A4P8-01	5.7322	Tumor
TCGA-44-2666-01	6.5051	Tumor
TCGA-44-5643-01	7.7939	Tumor
TCGA-44-2661-01	6.4997	Tumor
TCGA-69-8255-01	8.8389	Tumor
TCGA-49-4514-01	6.835	Tumor
TCGA-78-7154-01	7.477	Tumor
TCGA-55-8507-01	7.6391	Tumor
TCGA-95-A4VP-01	7.6273	Tumor
TCGA-50-6595-01	8.1385	Tumor
TCGA-78-7155-01	9.0954	Tumor
TCGA-05-4382-01	7.1636	Tumor
TCGA-05-5428-01	7.6969	Tumor
TCGA-44-5644-01	6.6722	Tumor
TCGA-55-6978-01	7.7567	Tumor
TCGA-NJ-A55R-01	6.6486	Tumor
TCGA-91-6840-01	6.4364	Tumor
TCGA-55-8094-01	7.3238	Tumor
TCGA-44-7661-01	7.7483	Tumor
TCGA-NJ-A4YF-01	7.2335	Tumor
TCGA-67-6217-01	6.0599	Tumor
TCGA-86-A4D0-01	8.4228	Tumor
TCGA-50-5939-01	7.1555	Tumor
TCGA-05-4410-01	6.4736	Tumor
TCGA-55-7816-01	6.7224	Tumor
TCGA-50-5051-01	6.7519	Tumor
TCGA-86-8279-01	6.389	Tumor
TCGA-55-6970-01	7.4797	Tumor
TCGA-49-4488-01	6.8728	Tumor
TCGA-97-7552-01	6.3456	Tumor
TCGA-95-7947-01	7.5286	Tumor
TCGA-05-4425-01	6.8339	Tumor
TCGA-78-7633-01	6.9801	Tumor
TCGA-64-1678-01	8.6879	Tumor
TCGA-80-5608-01	7.2754	Tumor
TCGA-64-5775-01	7.6193	Tumor
TCGA-55-8508-01	6.8558	Tumor
TCGA-44-2656-01	7.3251	Tumor
TCGA-55-7281-01	6.1606	Tumor
TCGA-J2-8194-01	6.8146	Tumor
TCGA-78-7150-01	7.9822	Tumor
TCGA-44-A47G-01	6.8187	Tumor
TCGA-99-8025-01	7.481	Tumor
TCGA-50-6592-01	7.9702	Tumor
TCGA-05-4249-01	7.1565	Tumor
TCGA-97-7553-01	6.8109	Tumor
TCGA-75-5125-01	7.9372	Tumor
TCGA-67-3772-01	6.2277	Tumor
TCGA-78-7147-01	6.8799	Tumor
TCGA-38-4628-01	7.0893	Tumor
TCGA-99-8032-01	7.2407	Tumor
TCGA-78-8648-01	6.9261	Tumor
TCGA-62-A46S-01	6.4431	Tumor
TCGA-NJ-A55O-01	6.3808	Tumor
TCGA-44-6779-01	7.8235	Tumor
TCGA-97-7938-01	6.3404	Tumor
TCGA-MP-A4SW-01	6.7168	Tumor
TCGA-49-AARN-01	6.5395	Tumor
TCGA-55-8097-01	6.2445	Tumor
TCGA-93-A4JQ-01	6.7705	Tumor
TCGA-55-8299-01	7.5373	Tumor
TCGA-4B-A93V-01	7.2953	Tumor
TCGA-75-6207-01	7.1874	Tumor
TCGA-05-4417-01	7.2563	Tumor
TCGA-78-7143-01	6.7954	Tumor
TCGA-44-3396-01	7.5617	Tumor
TCGA-53-7624-01	8.5098	Tumor
TCGA-75-5147-01	7.4155	Tumor
TCGA-55-1596-01	8.4087	Tumor
TCGA-44-5645-01	6.3829	Tumor
TCGA-05-4244-01	7.4234	Tumor
TCGA-55-6971-01	6.6121	Tumor
TCGA-73-7498-01	6.6579	Tumor
TCGA-49-AARO-01	7.374	Tumor
TCGA-05-4396-01	6.9985	Tumor
TCGA-69-8254-01	5.7774	Tumor
TCGA-J2-A4AG-01	6.1582	Tumor
TCGA-50-5066-02	7.262	Tumor
TCGA-78-7146-01	8.421	Tumor
TCGA-73-4677-01	6.6668	Tumor
TCGA-97-7554-01	6.7458	Tumor
TCGA-L9-A443-01	5.1736	Tumor
TCGA-55-6987-01	6.6364	Tumor
TCGA-78-7220-01	7.7323	Tumor
TCGA-64-1677-01	7.6398	Tumor
TCGA-73-4666-01	8.1402	Tumor
TCGA-49-4486-01	6.3306	Tumor
TCGA-MN-A4N5-01	7.4813	Tumor
TCGA-78-7152-01	6.0331	Tumor
TCGA-83-5908-01	8.2611	Tumor
TCGA-50-6593-01	6.9635	Tumor
TCGA-MP-A4TC-01	7.5922	Tumor
TCGA-78-7542-01	7.8124	Tumor
TCGA-55-8615-01	7.412	Tumor
TCGA-55-A493-01	8.1118	Tumor
TCGA-71-6725-01	6.2106	Tumor
TCGA-73-4668-01	7.3069	Tumor
TCGA-78-7158-01	5.9152	Tumor
TCGA-44-7659-01	5.1147	Tumor
TCGA-05-5425-01	7.4558	Tumor
TCGA-64-1679-01	7.1773	Tumor
TCGA-55-8506-01	6.6228	Tumor
TCGA-78-7166-01	6.2417	Tumor
TCGA-91-8496-01	5.7687	Tumor
TCGA-55-7283-01	7.3124	Tumor
TCGA-55-A4DG-01	5.6796	Tumor
TCGA-44-8119-01	7.2526	Tumor
TCGA-71-8520-01	7.1966	Tumor
TCGA-44-A47B-01	6.7688	Tumor
TCGA-73-4670-01	7.9452	Tumor
TCGA-MP-A4T7-01	7.0535	Tumor
TCGA-55-8203-01	6.9998	Tumor
TCGA-64-5774-01	8.5201	Tumor
TCGA-50-5933-01	6.9037	Tumor
TCGA-50-5946-01	8.4498	Tumor
TCGA-50-8460-01	6.1168	Tumor
TCGA-05-4250-01	8.1478	Tumor
TCGA-L9-A50W-01	5.9926	Tumor
TCGA-44-7662-01	7.7653	Tumor
TCGA-97-A4M6-01	6.2615	Tumor
TCGA-44-7669-01	8.0537	Tumor
TCGA-78-8640-01	7.6964	Tumor
TCGA-50-5931-01	7.772	Tumor
TCGA-44-3918-01	7.1986	Tumor
TCGA-93-7347-01	6.6152	Tumor
TCGA-38-7271-01	5.8738	Tumor
TCGA-55-7724-01	7.0902	Tumor
TCGA-73-A9RS-01	7.9606	Tumor
TCGA-49-4494-01	7.3641	Tumor
TCGA-49-4512-01	6.5546	Tumor
TCGA-62-8395-01	6.9017	Tumor
TCGA-55-A57B-01	6.9048	Tumor
TCGA-97-A4M5-01	6.7064	Tumor
TCGA-67-3774-01	6.7214	Tumor
TCGA-J2-8192-01	6.2283	Tumor
TCGA-78-7535-01	6.3508	Tumor
TCGA-95-A4VK-01	7.1626	Tumor
TCGA-38-4629-01	7.0946	Tumor
TCGA-35-5375-01	6.6376	Tumor
TCGA-38-4625-01	8.0484	Tumor
TCGA-91-6836-01	8.5377	Tumor
TCGA-73-4675-01	6.3925	Tumor
TCGA-62-8394-01	7.4782	Tumor
TCGA-86-7711-01	8.6678	Tumor
TCGA-78-7160-01	7.1345	Tumor
TCGA-55-6982-01	7.3274	Tumor
TCGA-55-6712-01	6.4507	Tumor
TCGA-55-7995-01	7.7367	Tumor
TCGA-69-A59K-01	7.2925	Tumor
TCGA-50-5936-01	7.7273	Tumor
TCGA-73-4676-01	7.43	Tumor
TCGA-86-6562-01	7.0356	Tumor
TCGA-35-4122-01	7.7963	Tumor
TCGA-75-6205-01	7.1444	Tumor
TCGA-80-5611-01	7.2272	Tumor
TCGA-93-A4JP-01	6.705	Tumor
TCGA-50-5935-01	5.8781	Tumor
TCGA-05-4389-01	7.4565	Tumor
TCGA-44-A479-01	7.4492	Tumor
TCGA-67-4679-01	5.6454	Tumor
TCGA-44-8120-01	7.0051	Tumor
TCGA-55-8089-01	7.9271	Tumor
TCGA-67-3773-01	6.1213	Tumor
TCGA-MP-A4TA-01	7.6365	Tumor
TCGA-50-5072-01	8.6321	Tumor
TCGA-55-8091-01	6.2832	Tumor
TCGA-97-A4LX-01	6.6804	Tumor
TCGA-55-6968-01	8.5708	Tumor
TCGA-MP-A4TH-01	6.8161	Tumor
TCGA-NJ-A4YQ-01	7.4984	Tumor
TCGA-44-A4SU-01	6.0026	Tumor
TCGA-49-4490-01	5.9328	Tumor
TCGA-97-A4M3-01	6.3841	Tumor
TCGA-J2-A4AD-01	6.6426	Tumor
TCGA-55-7227-01	6.3308	Tumor
TCGA-49-4505-01	6.6484	Tumor
TCGA-78-7153-01	6.6081	Tumor
TCGA-50-5944-01	6.8973	Tumor
TCGA-97-8172-01	6.3501	Tumor
TCGA-97-8171-01	5.8356	Tumor
TCGA-69-7761-01	6.7341	Tumor
TCGA-49-AARR-01	6.3573	Tumor
TCGA-L4-A4E6-01	6.3977	Tumor
TCGA-55-A48Y-01	7.1429	Tumor
TCGA-93-7348-01	5.8789	Tumor
TCGA-91-6847-01	7.8589	Tumor
TCGA-55-6980-01	5.6472	Tumor
TCGA-86-7953-01	7.6986	Tumor
TCGA-86-7714-01	5.6188	Tumor
TCGA-86-8585-01	7.2272	Tumor
TCGA-55-8511-01	7.5908	Tumor
TCGA-55-8092-01	7.2056	Tumor
TCGA-62-A46U-01	6.663	Tumor
TCGA-55-8208-01	7.2568	Tumor
TCGA-64-1676-01	6.4523	Tumor
TCGA-91-A4BD-01	5.7213	Tumor
TCGA-78-7145-01	7.4984	Tumor
TCGA-97-8179-01	7.6382	Tumor
TCGA-44-2662-01	7.606	Tumor
TCGA-86-8074-01	6.6856	Tumor
TCGA-78-7540-01	6.71	Tumor
TCGA-05-4426-01	6.891	Tumor
TCGA-50-8457-01	5.5527	Tumor
TCGA-75-5122-01	7.3747	Tumor
TCGA-55-6975-01	7.7024	Tumor
TCGA-86-8073-01	6.9341	Tumor
TCGA-86-8076-01	6.0124	Tumor
TCGA-62-A46P-01	5.8166	Tumor
TCGA-J2-A4AE-01	5.8354	Tumor
TCGA-67-3770-01	6.5645	Tumor
TCGA-55-A490-01	6.2769	Tumor
TCGA-44-4112-01	6.2097	Tumor
TCGA-49-6745-01	7.5274	Tumor
TCGA-93-A4JN-01	7.5462	Tumor
TCGA-86-8054-01	8.5296	Tumor
TCGA-55-A4DF-01	7.3245	Tumor
TCGA-75-5146-01	7.6522	Tumor
TCGA-05-4384-01	6.4204	Tumor
TCGA-55-8207-01	5.7227	Tumor
TCGA-69-7760-01	7.2504	Tumor
TCGA-49-4510-01	5.5908	Tumor
TCGA-64-5815-01	6.4824	Tumor
TCGA-55-8620-01	7.6129	Tumor
TCGA-73-4662-01	7.6075	Tumor
TCGA-49-AAR4-01	7.6217	Tumor
TCGA-55-7910-01	7.7665	Tumor
TCGA-55-8621-01	6.5643	Tumor
TCGA-55-6981-01	7.4009	Tumor
TCGA-MP-A4TJ-01	6.6953	Tumor
TCGA-50-5942-01	6.0166	Tumor
TCGA-05-4434-01	6.9886	Tumor
TCGA-78-7148-01	7.3517	Tumor
TCGA-69-8453-01	6.323	Tumor
TCGA-97-8176-01	7.7827	Tumor
TCGA-67-3771-01	7.6797	Tumor
TCGA-78-8655-01	6.4425	Tumor
TCGA-95-7948-01	6.805	Tumor
TCGA-78-7161-01	6.4844	Tumor
TCGA-05-4427-01	7.7521	Tumor
TCGA-97-A4M2-01	5.9958	Tumor
TCGA-50-5068-01	6.2146	Tumor
TCGA-44-6148-01	6.555	Tumor
TCGA-78-7536-01	8.5932	Tumor
TCGA-50-5044-01	7.4	Tumor
TCGA-55-A48X-01	6.942	Tumor
TCGA-55-A494-01	6.6546	Tumor
TCGA-91-A4BC-01	7.4968	Tumor
TCGA-55-6986-01	6.4675	Tumor
TCGA-44-2657-01	6.0026	Tumor
TCGA-49-6767-01	7.1965	Tumor
TCGA-67-6216-01	6.5766	Tumor
TCGA-50-5930-01	6.2699	Tumor
TCGA-97-8552-01	6.0594	Tumor
TCGA-86-8281-01	6.3785	Tumor
TCGA-95-8039-01	6.6992	Tumor
TCGA-55-8204-01	7.2567	Tumor
TCGA-64-5781-01	7.3152	Tumor
TCGA-NJ-A4YI-01	5.7913	Tumor
TCGA-L9-A444-01	6.7898	Tumor
TCGA-MP-A4SV-01	7.1856	Tumor
TCGA-55-8090-01	6.7892	Tumor
TCGA-95-7944-01	8.2772	Tumor
TCGA-NJ-A4YG-01	6.2388	Tumor
TCGA-91-6830-01	6.6267	Tumor
TCGA-75-7030-01	6.3623	Tumor
TCGA-55-8512-01	6.2523	Tumor
TCGA-44-6777-01	6.5373	Tumor
TCGA-55-6985-01	7.0032	Tumor
TCGA-MP-A4TE-01	6.6676	Tumor
TCGA-L4-A4E5-01	7.092	Tumor
TCGA-55-6969-01	7.6317	Tumor
TCGA-55-7815-01	6.3307	Tumor
TCGA-05-4390-01	7.8196	Tumor
TCGA-78-7537-01	5.9776	Tumor
TCGA-55-7284-01	6.84	Tumor
TCGA-55-8614-01	7.5057	Tumor
TCGA-75-5126-01	7.491	Tumor
TCGA-95-7043-01	7.0927	Tumor
TCGA-L9-A8F4-01	7.4942	Tumor
TCGA-44-7670-01	8.0517	Tumor
TCGA-95-7039-01	7.1723	Tumor
TCGA-MP-A4TI-01	7.4862	Tumor
TCGA-44-2665-01	6.078	Tumor
TCGA-05-4395-01	7.5146	Tumor
TCGA-O1-A52J-01	7.0038	Tumor
TCGA-55-5899-01	7.7737	Tumor
TCGA-55-7728-01	6.1565	Tumor
TCGA-99-7458-01	6.7071	Tumor
TCGA-97-A4M0-01	5.5428	Tumor
TCGA-91-6848-01	8.599	Tumor
TCGA-50-5055-01	6.1853	Tumor
TCGA-44-7671-01	6.7708	Tumor
TCGA-05-5423-01	6.1905	Tumor
TCGA-55-8619-01	6.4229	Tumor
TCGA-64-1680-01	7.116	Tumor
TCGA-49-AAR3-01	6.9664	Tumor
TCGA-55-8514-01	4.4662	Tumor
TCGA-91-8497-01	6.5764	Tumor
TCGA-49-AAR9-01	8.4297	Tumor
TCGA-44-6774-01	7.4847	Tumor
TCGA-44-3919-01	7.1949	Tumor
TCGA-44-6147-01	5.7989	Tumor
TCGA-55-8301-01	6.8958	Tumor
TCGA-95-7562-01	7.1691	Tumor
TCGA-55-6983-01	6.4943	Tumor
TCGA-53-7813-01	5.9469	Tumor
TCGA-MN-A4N1-01	7.4617	Tumor
TCGA-78-7159-01	7.2012	Tumor
TCGA-50-6673-01	6.5008	Tumor
TCGA-75-7025-01	5.5562	Tumor
TCGA-55-7726-01	7.0436	Tumor
TCGA-L9-A743-01	7.2628	Tumor
TCGA-86-8358-01	8.8334	Tumor
TCGA-55-6972-01	6.3286	Tumor
TCGA-55-7727-01	7.3445	Tumor
TCGA-91-6831-01	8.2669	Tumor
TCGA-MN-A4N4-01	6.3779	Tumor
TCGA-55-8302-01	7.5174	Tumor
TCGA-MP-A4TK-01	7.1134	Tumor
