# Supplementary material for: Prognostic and immune infiltrative biomarkers of CENPO in pan–cancer and its relationship with lung adenocarcinoma cell proliferation and metastasis
Source: BMC Cancer. 2023 Aug 9;23:735. doi: 10.1186/s12885-023-11233-2 (PMC10410993; doi:10.1186/s12885-023-11233-2)
Supplement: Supplementary file 11 — Additional file 11. [file 12885_2023_11233_MOESM11_ESM.xlsx]

## Sheet: Sheet1
cancer	cut off value	sensitivity	specificity	YI
BLCA	1.461	0.806	0.895	0.701
BRCA	1.351	0.787	0.938	0.725
COAD	1.739	0.793	0.927	0.719
ESCA	1.409	0.92	0.727	0.647
GBM	1.672	0.904	1	0.904
HNSC	1.439	0.841	1	0.841
KICH	0.896	0.6	0.958	0.558
LIHC	0.451	0.874	0.88	0.754
LUAD	1.366	0.744	0.966	0.71
LUSC	1.48	0.948	1	0.948
PRAD	1.089	0.732	0.655	0.923
READ	1.576	0.862	0.9	0.762
SARC	0.951	0.962	1	0.962
STAD	1.315	0.896	0.969	0.865
THCA	1.657	0.024	1	0.024
UCEC	1.149	0.921	0.835	0.914
