# Supplementary material for: Prognostic and immune infiltrative biomarkers of CENPO in pan–cancer and its relationship with lung adenocarcinoma cell proliferation and metastasis
Source: BMC Cancer. 2023 Aug 9;23:735. doi: 10.1186/s12885-023-11233-2 (PMC10410993; doi:10.1186/s12885-023-11233-2)
Supplement: Supplementary file 14 — Additional file 14. [file 12885_2023_11233_MOESM14_ESM.xls]

## Sheet: Sheet1
gene p value drug	CENPO
durgSenstivity.5Z)-7-Oxozeaenol	0.00014
durgSenstivity.681640	p < 2.22e−16
durgSenstivity.AG-014699	5.1e−10
durgSenstivity.AICAR	1.7e−05
durgSenstivity.AMG-706	1.1e−07
durgSenstivity.ATRA	0.00018
durgSenstivity.Axitinib	5.2e−08
durgSenstivity.AZ628	0.00019
durgSenstivity.AZD7762	7.4e−07
durgSenstivity.BI-2536	p < 2.22e−16
durgSenstivity.BIRB 0796	p < 2.22e−16
durgSenstivity.Bleomycin	0.00029
durgSenstivity.BMS345541	0.00081
durgSenstivity.Bosutinib	1.8e−11
durgSenstivity.Bryostatin 1	8.7e−14
durgSenstivity.BX-795	2.2e−07
durgSenstivity.CAL-101	0.00016
durgSenstivity.Camptothecin	3.3e−07
durgSenstivity.CCT007093	1.6e−12
durgSenstivity.CCT018159	p < 2.22e−16
durgSenstivity.CGP-082996	1.1e−08
durgSenstivity.CH5424802	1.4e−10
durgSenstivity.Cisplatin	p < 2.22e−16
durgSenstivity.CP724714	0.00023
durgSenstivity.Cytarabine	9.1e−11
durgSenstivity.Dabrafenib	8.6e−06
durgSenstivity.Docetaxel	7.3e−16
durgSenstivity.EHT 1864	0.00059
durgSenstivity.Elesclomol	4.4e−05
durgSenstivity.Embelin	0.00058
durgSenstivity.Epothilone B	7.6e−13
durgSenstivity.Erlotinib	3.6e−09
durgSenstivity.Etoposide	2.3e−09
durgSenstivity.EX-527	2.4e−12
durgSenstivity.FTI-277	p < 2.22e−16
durgSenstivity.GDC0449	p < 2.22e−16
durgSenstivity.Gefitinib	1.6e−15
durgSenstivity.Gemcitabine	2.6e−12
durgSenstivity.GNF-2	8.4e−14
durgSenstivity.GSK429286A	9.1e−13
durgSenstivity.GSK-650394	2.3e−08
durgSenstivity.GSK1904529A	2.5e−14
durgSenstivity.GSK2126458	3.9e−05
durgSenstivity.GW 441756	2.4e−05
durgSenstivity.GW-2580	7e−13
durgSenstivity.GW843682X	p < 2.22e−16
durgSenstivity.HG-5-88-01	3.8e−06
durgSenstivity.HG-6-64-1	0.00018
durgSenstivity.I-BET-762	0.0003
durgSenstivity.IOX2	3.4e−14
durgSenstivity.JNJ-26854165	5e−06
durgSenstivity.JNK Inhibitor VIII	p < 2.22e−16
durgSenstivity.JNK-9L	5.8e−09
durgSenstivity.JQ12	4.9e−08
durgSenstivity.KIN001-055	5e−05
durgSenstivity.KIN001-102	8.2e−08
durgSenstivity.KIN001-266	5.3e−05
durgSenstivity.KIN001-270	0.00043
durgSenstivity.KU-55933	1.9e−09
durgSenstivity.Lenalidomide	p < 2.22e−16
durgSenstivity.LFM-A13	4.2e−13
durgSenstivity.Masitinib	0.00032
durgSenstivity.Methotrexate	p < 2.22e−16
durgSenstivity.Midostaurin	0.00061
durgSenstivity.Mitomycin C	4.2e−06
durgSenstivity.MK-2206	6.2e−13
durgSenstivity.MLN4924	6.5e−06
durgSenstivity.MS-275	1.3e−14
durgSenstivity.Nilotinib	9.2e−14
durgSenstivity.NPK76-II-72-1	1.2e−06
durgSenstivity.NSC-87877	p < 2.22e−16
durgSenstivity.NSC-207895	3.8e−14
durgSenstivity.NU-7441	7.2e−07
durgSenstivity.Nutlin-3a (-)	1.2e−08
durgSenstivity.Obatoclax Mesylate	0.00087
durgSenstivity.OSU-03012	1.4e−05
durgSenstivity.Paclitaxel	1.7e−13
durgSenstivity.Pazopanib	0.00018
durgSenstivity.PD-173074	1.3e−11
durgSenstivity.PD-0325901	1e−06
durgSenstivity.PF-562271	0.00011
durgSenstivity.PF-4708671	7.6e−07
durgSenstivity.PHA-665752	2.9e−12
durgSenstivity.Pyrimethamine	p < 2.22e−16
durgSenstivity.QS11	0.00011
durgSenstivity.Rapamycin	6.9e−07
durgSenstivity.RO-3306	p < 2.22e−16
durgSenstivity.Roscovitine	3.3e−15
durgSenstivity.rTRAIL	1.6e−12
durgSenstivity.SB 216763	p < 2.22e−16
durgSenstivity.SB 505124	0.00089
durgSenstivity.SGC0946	6.9e−06
durgSenstivity.SL 0101-1	6.7e−14
durgSenstivity.STF-62247	0.00025
durgSenstivity.TAE684	2.2e−05
durgSenstivity.Tamoxifen	6.1e−05
durgSenstivity.Temozolomide	p < 2.22e−16
durgSenstivity.TGX221	1.4e−05
durgSenstivity.Thapsigargin	1.8e−11
durgSenstivity.Tivozanib	0.0002
durgSenstivity.Trametinib	0.00032
durgSenstivity.TW 37	3.7e−12
durgSenstivity.Veliparib	2.8e−15
durgSenstivity.Vinblastine	p < 2.22e−16
durgSenstivity.Vinorelbine	3.6e−12
durgSenstivity.Vorinostat	2.7e−09
durgSenstivity.VX-680	2.5e−09
durgSenstivity.VX-702	2.4e−11
durgSenstivity.XMD8-85	1.9e−07
durgSenstivity.XMD15-27	1.7e−06
durgSenstivity.YK 4-279	1e−07
durgSenstivity.YM155	1.5e−12
durgSenstivity.ZM-447439	9.5e−12
durgSenstivity.ZSTK474	9.4e−07
